# Supplementary material for: UV-B induces the expression of flavonoid biosynthetic pathways in blueberry (Vaccinium corymbosum) calli
Source: Frontiers journal article supplement (doi:10.3389/fpls.2022.1079087), 2022-11-22
Supplement: Data_Sheet_1.PDF [file Data_Sheet_1.PDF]

0h\_vs\_1h

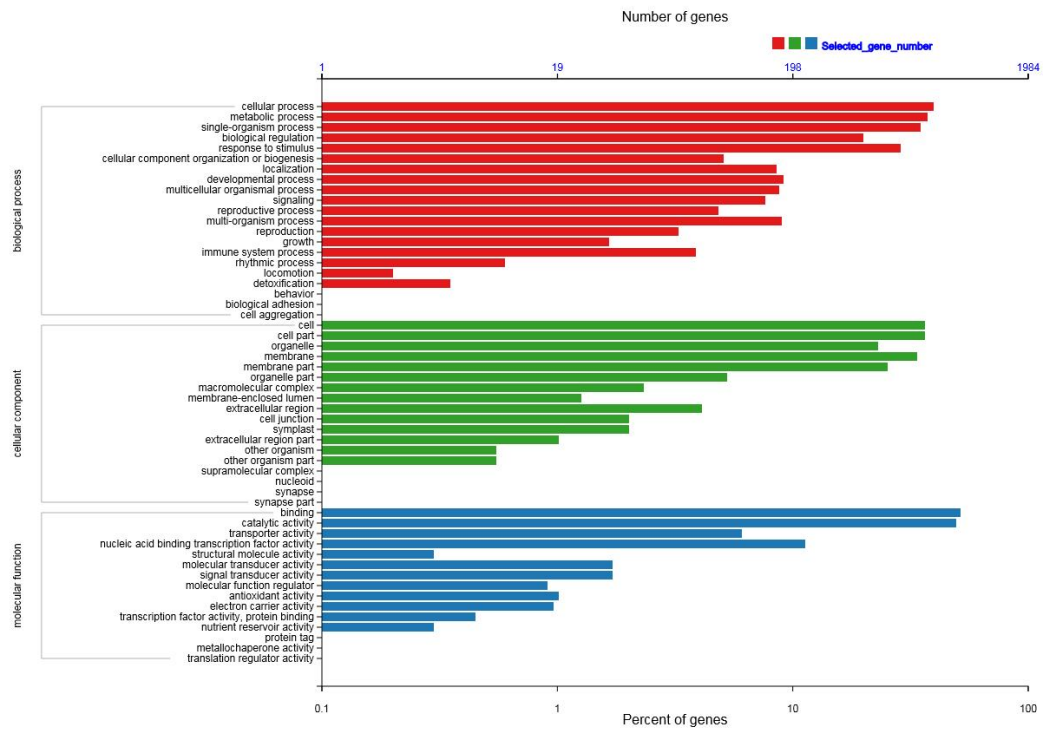

0h\_vs\_3h

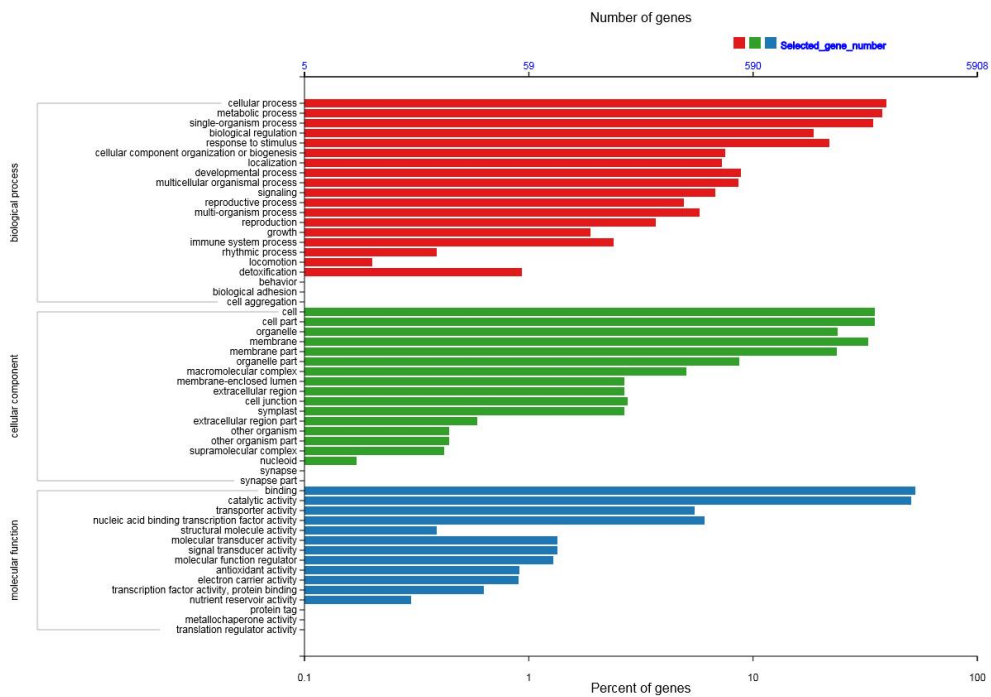

0h\_vs\_6h

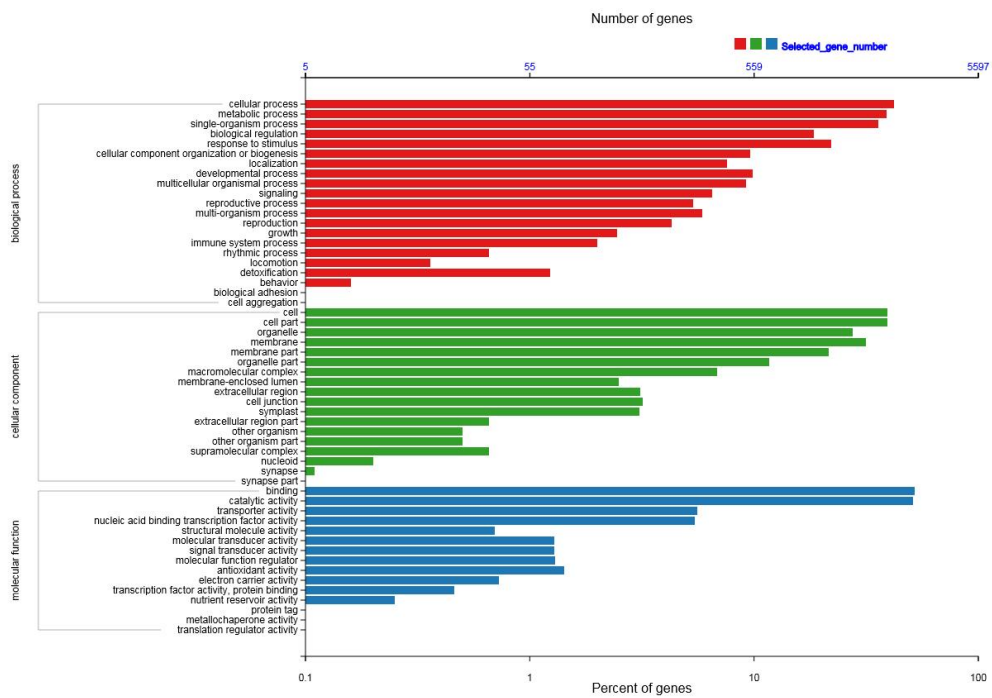

0h\_vs\_12h

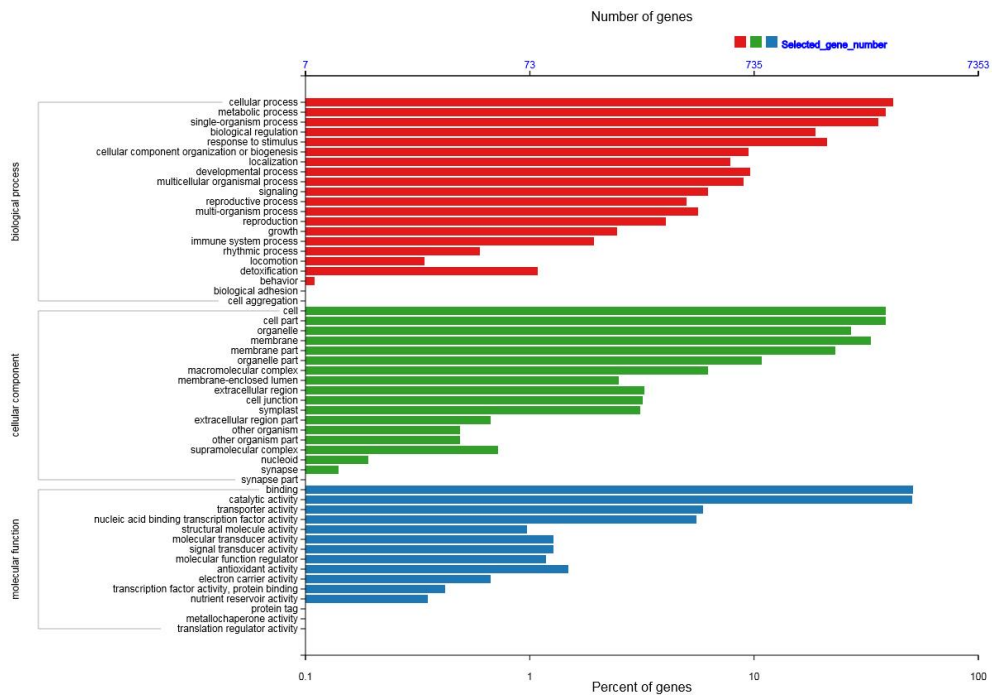

0h\_vs\_24h

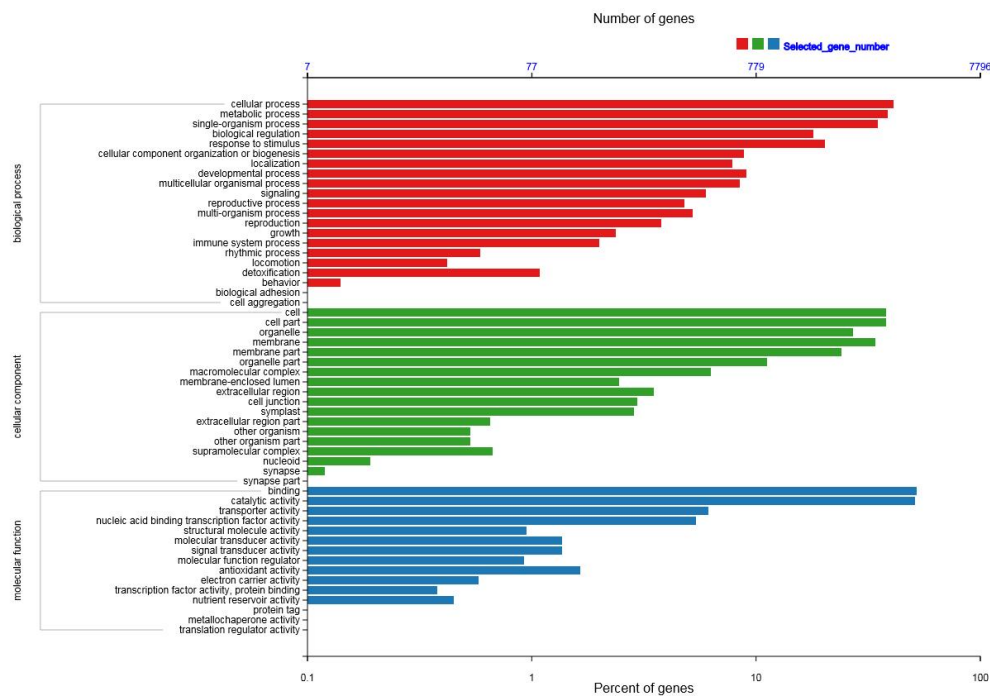

0h\_vs\_UV (1h, 3h, 6h, 12h, 24h)

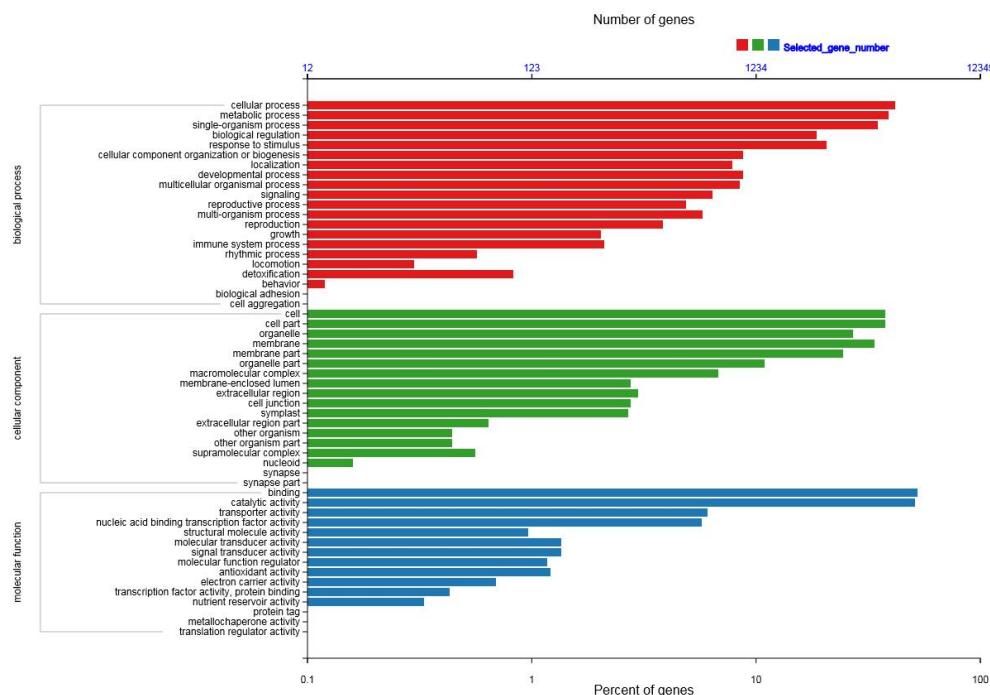

Supplementary Figure S1 | GO classifications of DEGs under UV-B treatment in three main categories: biological process (red), cellular component (green) and molecular function (blue).
