# Supplementary material for: UV-B induces the expression of flavonoid biosynthetic pathways in blueberry (Vaccinium corymbosum) calli
Source: Frontiers journal article supplement (doi:10.3389/fpls.2022.1079087), 2022-11-22
Supplement: Data_Sheet_2.PDF [file Data_Sheet_2.PDF]

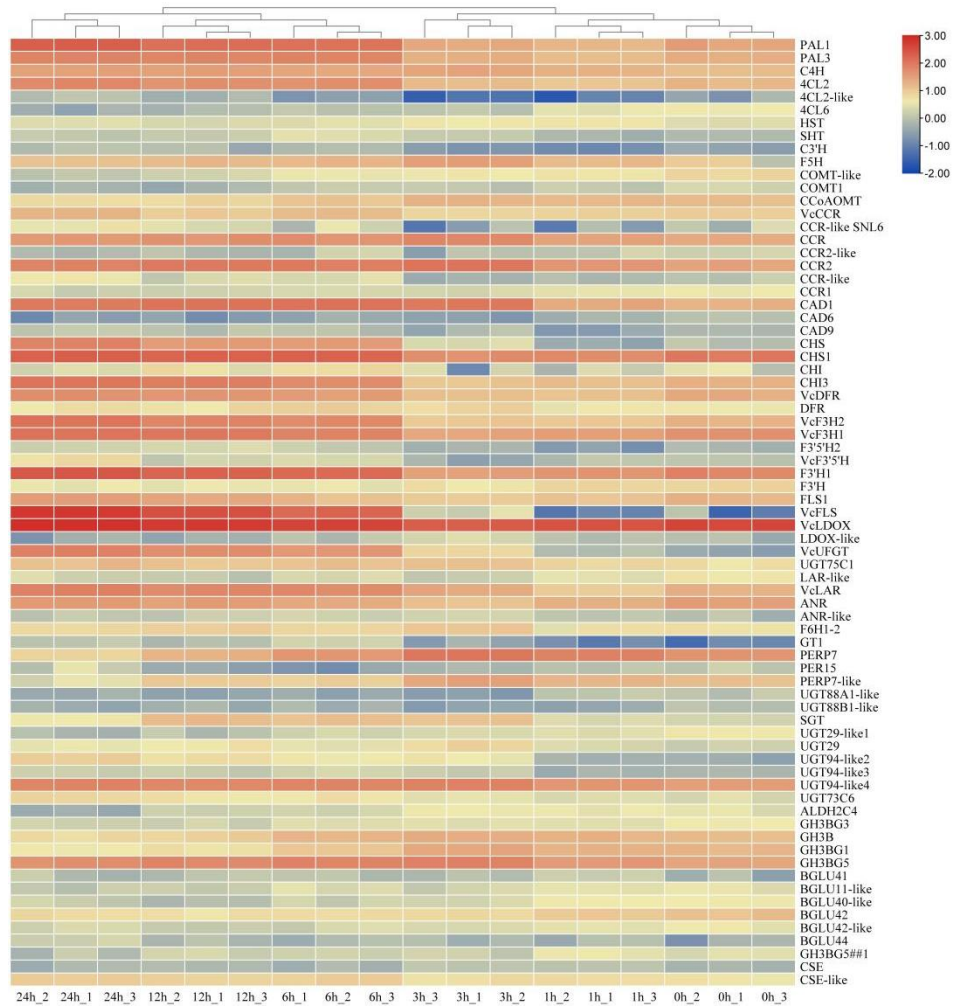

Supplementary Figure S2 | Heatmap analysis for differential expression levels of genes from the phenylpropanoid, flavonoid, flavonol and anthocyanin KEGG pathways. The gradation from red to blue represents the transition from large to small values of  $\log_{10}(\text{FPKM})$ .
