# Supplementary material for: UV-B induces the expression of flavonoid biosynthetic pathways in blueberry (Vaccinium corymbosum) calli
Source: Frontiers journal article supplement (doi:10.3389/fpls.2022.1079087), 2022-11-22
Supplement: Data_Sheet_3.PDF [file Data_Sheet_3.PDF]

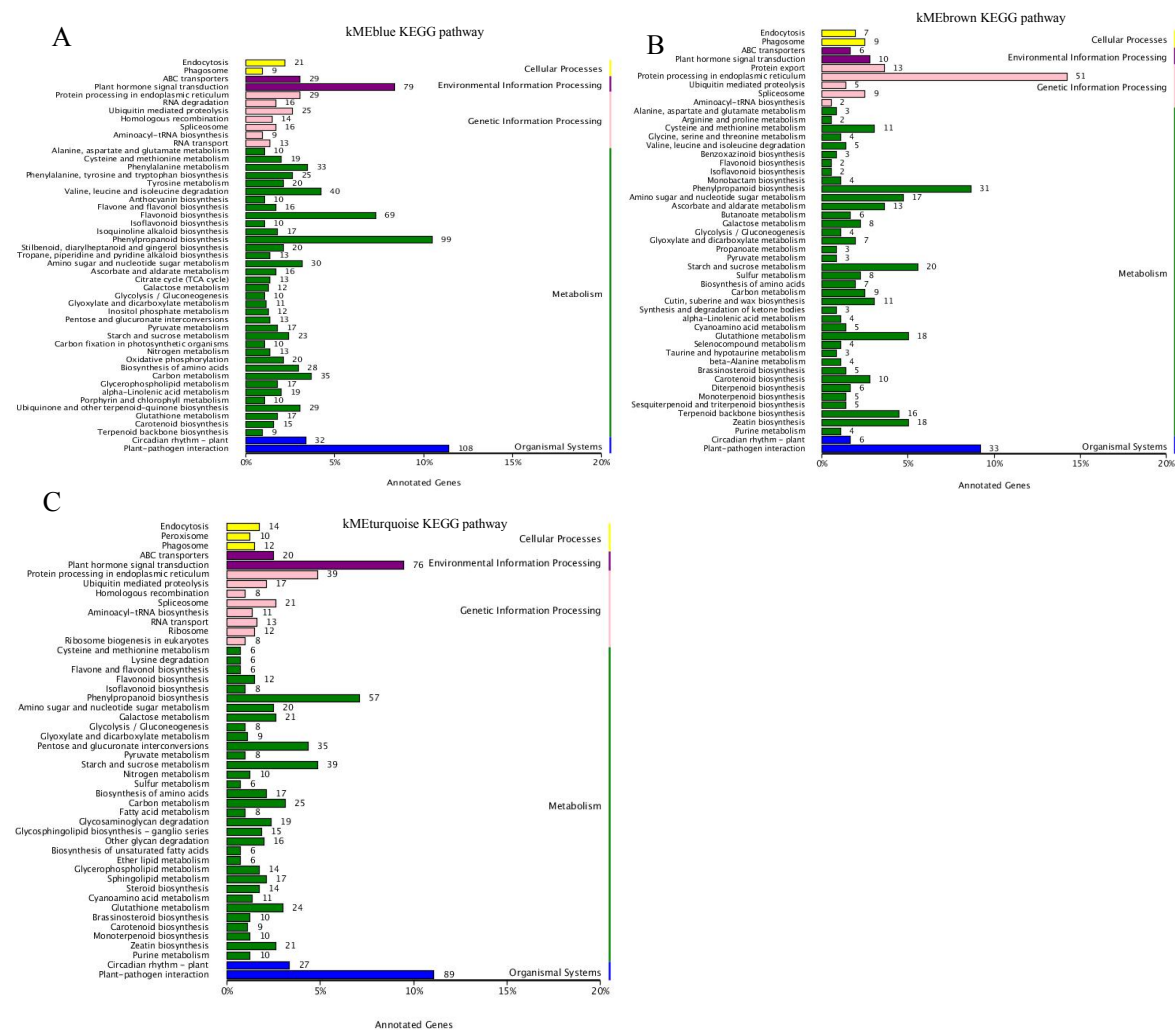

Supplementary Figure S3 | KEGG enrichment pathway analysis for the kMEblue (A), kMEbrown (B) and kMEquoise (C) modules from the weighted gene co-expression network.
