# Supplementary material for: UV-B induces the expression of flavonoid biosynthetic pathways in blueberry (Vaccinium corymbosum) calli
Source: Frontiers journal article supplement (doi:10.3389/fpls.2022.1079087), 2022-11-22
Supplement: Data_Sheet_5.PDF [file Data_Sheet_5.PDF]

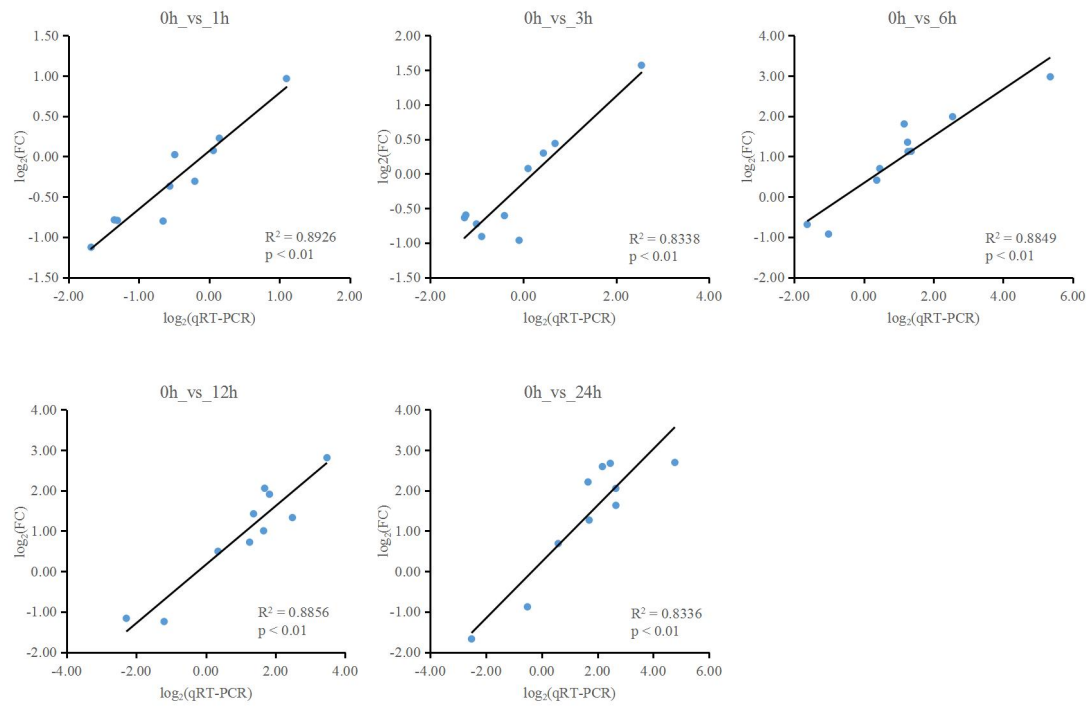

Supplementary Figure S5 | Validation of transcript expression changes by qRT-qPCR.

The figure is based on  $\log_2(2^{-\Delta\Delta C_t})$  data from qRT-PCR and  $\log_2(\text{fold change})$  data from RNA-seq. The linear trend line and the  $R^2$  are shown.
