# Supplementary material for: UV-B induces the expression of flavonoid biosynthetic pathways in blueberry (Vaccinium corymbosum) calli
Source: Frontiers journal article supplement (doi:10.3389/fpls.2022.1079087), 2022-11-22
Supplement: Data_Sheet_6.xls [file Data_Sheet_6.xls]

## Sheet: Table S1
Table S1 Primers used for qRT- PCR
Gene	Forward primer (5'-3')	Reverse primer (5'-3')
4CL2	TGCCACCCATCGTTCTTG	GCTTAGCCCTGACTTTATCCT
VcCHI3	GAGTTCACGACCACCAAG	AGCAGAAATAAGGGCATC
DFR	CACCTATTGGAGTTGCCTAA	ACCAGCCTCTTGACTGTCTT
VcF3'5'H	GGTGAAGGGACATAGTGAGT	GGTGCCAGCAGTGAATAG
VcF3H-2	GGTGTTATCAGAGGCTATGGG	TGTCGCTTGAGTCCGAGTGT
VcLAR	TCACCCTAGTCCGTGCTAT	CCTCCGCTTCTCGTTGTA
MYB44	TTCCTCATCCGATTCCACTC	CGGCCTTTAATGTACTTGCT
MYB114	TGATTCTCAGGCTTCACA	CTCTTTCTCCACCATTTC
VcMYBPA1	CTAACGACCAACCACCA	CAACAAGAAACCCAACG
ARF18	TCAGGATACTTCGGGTGC	CAGAAACTTTAGGGACAAA

## Sheet: Table S2
Table S2 List of differential expressed genes (DEGs) and their functional annotation
Gene ID	0h_1_FPKM	0h_2_FPKM	0h_3_FPKM	1h_1_FPKM	1h_2_FPKM	1h_3_FPKM	3h_1_FPKM	3h_2_FPKM	3h_3_FPKM	6h_1_FPKM	6h_2_FPKM	6h_3_FPKM	12h_1_FPKM	12h_2_FPKM	12h_3_FPKM	24h_1_FPKM	24h_2_FPKM	24h_3_FPKM	0h_vs_1h_DESeq2_FDR	0h_vs_1h_DESeq2_log2FC	0h_vs_1h_DESeq2_(FDR_0.01_FC_2)_regulated	0h_vs_3h_DESeq2_FDR	0h_vs_3h_DESeq2_log2FC	0h_vs_3h_DESeq2_(FDR_0.01_FC_2)_regulated	0h_vs_6h_DESeq2_FDR	0h_vs_6h_DESeq2_log2FC	0h_vs_6h_DESeq2_(FDR_0.01_FC_2)_regulated	0h_vs_12h_DESeq2_FDR	0h_vs_12h_DESeq2_log2FC	0h_vs_12h_DESeq2_(FDR_0.01_FC_2)_regulated	0h_vs_24h_DESeq2_FDR	0h_vs_24h_DESeq2_log2FC	0h_vs_24h_DESeq2_(FDR_0.01_FC_2)_regulated	COG_class_annotation	GO_annotation	KEGG_pathway_annotation	KOG_class_annotation	Pfam_annotation	Swiss_Prot_annotation	eggNOG_class_annotation	NR_annotation
VaccDscaff1-augustus-gene-0.30	0.398241	0.747784	0.320853	0.855724	0.870911	1.30887	0.898892	1.76465	1.48375	1.27172	1.97194	1.34105	3.38007	2.16958	1.30908	2.30347	1.64689	2.51163	0.00943143	0.952983	normal	2.62e-05	1.55218	up	2.42e-06	1.64459	up	4.83e-09	2.22731	up	6.45e-12	2.18639	up	--	--	K22849|6.4e-57|vvi:100242564|K22849 diacylglycerol O-acyltransferase 3, plant [EC:2.3.1.20] | (RefSeq) uncharacterized LOC100242564	--	--	Diacylglycerol O-acyltransferase 3 OS=Arabidopsis thaliana OX=3702 GN=DGAT3 PE=1 SV=2	--	hypothetical protein C3L33_13072, partial [Rhododendron williamsianum]
VaccDscaff1-augustus-gene-1.28	0.179291	0.433322	0.391134	0.140712	0.338058	0.289391	0.430861	0.603989	0.558652	0.952177	0.709273	1.21742	1.25615	0.724328	0.711542	0.843036	0.945843	0.849833	--	--	--	--	--	--	0.000980756	1.44917	up	0.00325215	1.41744	up	0.00121115	1.41991	up	Signal transduction mechanisms;; Transcription	Molecular Function: calcium ion binding (GO:0005509);; Biological Process: guanosine tetraphosphate metabolic process (GO:0015969);; Molecular Function: kinase activity (GO:0016301);;	K00951|3.7e-223|vvi:100263094|K00951 GTP pyrophosphokinase [EC:2.7.6.5] | (RefSeq) probable GTP diphosphokinase CRSH, chloroplastic	Signal transduction mechanisms	Region found in RelA / SpoT proteins	Probable GTP diphosphokinase CRSH, chloroplastic OS=Arabidopsis thaliana OX=3702 GN=CRSH PE=2 SV=1	Signal transduction mechanisms	GTP diphosphokinase [Actinidia chinensis var. chinensis]
VaccDscaff1-augustus-gene-10.41	2.68799	4.24408	2.55675	1.82343	3.25861	2.3817	1.82129	2.20885	1.50396	0.992011	1.42299	0.803371	0.465355	0.900505	0.764173	1.49042	0.905335	0.87542	0.662789	-0.195415	normal	0.0422181	-0.567129	normal	5.56e-06	-1.34334	down	8.24e-10	-1.8897	down	7.96e-06	-1.32519	down	--	Biological Process: polysaccharide biosynthetic process (GO:0000271);; Biological Process: response to acid chemical (GO:0001101);; Cellular Component: cellular_component (GO:0005575);; Cellular Component: intracellular (GO:0005622);; Cellular Component: cell (GO:0005623);; Cellular Component: cytoplasm (GO:0005737);; Cellular Component: endoplasmic reticulum (GO:0005783);; Cellular Component: Go…	K03377|1.1e-250|nnu:104607047|K03377 N-acetylneuraminate 9-O-acetyltransferase [EC:2.3.1.45] | (RefSeq) protein REDUCED WALL ACETYLATION 3	General function prediction only	10 TM Acyl Transferase domain found in Cas1p	Protein REDUCED WALL ACETYLATION 2 OS=Arabidopsis thaliana OX=3702 GN=RWA2 PE=1 SV=1	Posttranslational modification, protein turnover, chaperones	hypothetical protein C3L33_13019, partial [Rhododendron williamsianum]
VaccDscaff1-augustus-gene-11.31	3.49567	2.99222	2.88364	5.14018	5.55974	5.84432	6.40203	8.47045	8.45468	7.38774	7.11511	7.84246	5.22305	5.97533	5.05078	4.61866	5.48151	4.99138	1.13e-08	0.906758	normal	2.27e-19	1.47352	up	1.3e-21	1.36522	up	7.16e-08	0.941353	normal	7.71e-07	0.8297	normal	RNA processing and modification	Molecular Function: molecular_function (GO:0003674);; Molecular Function: catalytic activity (GO:0003824);; Molecular Function: polynucleotide adenylyltransferase activity (GO:0004652);; Cellular Component: cellular_component (GO:0005575);; Cellular Component: intracellular (GO:0005622);; Cellular Component: cell (GO:0005623);; Cellular Component: nucleus (GO:0005634);; Cellular Component: cytopl…	K14376|8.0e-190|cit:102610335|K14376 poly(A) polymerase [EC:2.7.7.19] | (RefSeq) nuclear poly(A) polymerase 3	RNA processing and modification	Poly(A) polymerase central domain	Nuclear poly(A) polymerase 3 OS=Arabidopsis thaliana OX=3702 GN=PAPS3 PE=1 SV=1	RNA processing and modification	hypothetical protein C3L33_13016, partial [Rhododendron williamsianum]
VaccDscaff1-augustus-gene-116.48	18.1206	17.8065	16.0154	23.9161	22.0542	21.6856	49.5592	43.0106	46.8326	42.6362	41.9697	37.2473	36.506	39.013	36.9946	24.4653	21.3899	21.9933	1.11e-07	0.500127	normal	9.31e-75	1.6021	up	2.33e-50	1.35639	up	1.92e-44	1.27229	up	1.57e-08	0.537567	normal	Posttranslational modification, protein turnover, chaperones	Molecular Function: protein binding (GO:0005515);;	K00799|3.1e-131|adu:107482147|K00799 glutathione S-transferase [EC:2.5.1.18] | (RefSeq) uncharacterized protein LOC107482147	Posttranslational modification, protein turnover, chaperones	Glutathione S-transferase, N-terminal domain	Probable glutathione S-transferase OS=Nicotiana tabacum OX=4097 PE=2 SV=1	Posttranslational modification, protein turnover, chaperones	uncharacterized protein LOC107482147 [Arachis duranensis]
VaccDscaff1-augustus-gene-116.49	18.0006	18.1933	17.0919	23.6565	23.4746	24.2108	45.9507	42.0049	43.2731	36.5867	32.3123	31.5273	30.2984	33.0153	32.6456	20.9256	19.54	20.3505	1.01e-09	0.539158	normal	4.49e-75	1.47924	up	6.11e-32	1.04129	up	2.3e-27	1.00561	up	0.000208156	0.343606	normal	Posttranslational modification, protein turnover, chaperones	Molecular Function: protein binding (GO:0005515);;	K00799|5.3e-85|pop:18102470|K00799 glutathione S-transferase [EC:2.5.1.18] | (RefSeq) probable glutathione S-transferase	Posttranslational modification, protein turnover, chaperones	Glutathione S-transferase, N-terminal domain	Probable glutathione S-transferase OS=Glycine max OX=3847 GN=HSP26-A PE=2 SV=1	Posttranslational modification, protein turnover, chaperones	hypothetical protein C3L33_12631, partial [Rhododendron williamsianum]
VaccDscaff1-augustus-gene-12.27	5.16345	6.0954	3.42644	5.99507	5.24912	5.59729	2.12849	2.63995	2.41599	2.26567	2.87402	2.13209	2.1512	1.76774	1.43373	1.20763	1.38213	2.15047	0.434614	0.293103	normal	0.0138067	-0.793179	normal	0.0153502	-0.815052	normal	0.000537494	-1.20911	down	0.000132959	-1.38831	down	--	--	--	General function prediction only	--	--	Function unknown	hypothetical protein C3L33_13006, partial [Rhododendron williamsianum]
VaccDscaff1-augustus-gene-128.27	1.69649	1.51369	1.57988	0.730954	0.856975	0.859393	0.324189	0.52648	0.572861	0.694319	0.342672	0.783673	0.647172	0.38991	0.481985	0.646376	0.639738	0.511428	2.58e-05	-0.802902	normal	2.49e-10	-1.51512	down	1.89e-05	-1.21241	down	1.27e-09	-1.44909	down	4.22e-10	-1.23746	down	--	--	--	--	--	COP1-interacting protein 7 OS=Arabidopsis thaliana OX=3702 GN=CIP7 PE=1 SV=1	--	COP1-interacting protein 7-like isoform X3 [Camellia sinensis]
VaccDscaff1-augustus-gene-128.28	0.847385	0.978157	0.625497	0.640453	0.553787	0.682965	1.16104	0.702136	0.792368	1.12379	0.851363	0.848571	1.69353	1.42387	1.16949	2.00689	1.55454	1.73185	0.644539	-0.225437	normal	0.480901	0.283269	normal	0.382573	0.317006	normal	0.00173145	0.936208	normal	1.39e-06	1.22587	up	--	Molecular Function: RNA binding (GO:0003723);;	--	--	RNA recognition motif. (a.k.a. RRM, RBD, or RNP domain)	--	Function unknown	uncharacterized protein LOC114269137 isoform X2 [Camellia sinensis]
VaccDscaff1-augustus-gene-129.21	0.92472	1.5794	1.35076	2.41809	1.41564	1.57404	3.38479	1.84825	1.59035	3.50409	3.85867	1.68661	2.33817	4.06777	2.30822	2.00376	2.30248	2.39597	0.262226	0.505738	normal	0.0253516	0.933369	normal	0.00136722	1.25146	up	0.000791116	1.26727	up	0.00830035	0.917441	normal	--	Molecular Function: protein binding (GO:0005515);;	--	--	FBD	F-box/FBD/LRR-repeat protein At2g04230 OS=Arabidopsis thaliana OX=3702 GN=At2g04230 PE=2 SV=1	Function unknown	hypothetical protein C3L33_12599, partial [Rhododendron williamsianum]
VaccDscaff1-augustus-gene-146.29	3.33032	2.89353	3.44202	1.83447	2.57382	1.96067	1.90628	2.43123	2.00526	2.33623	1.50426	1.87302	1.80758	1.45177	0.8183	1.76434	1.50924	1.76691	0.0541811	-0.453512	normal	0.0364172	-0.415761	normal	0.00441082	-0.611146	normal	0.000368213	-1.03387	down	2.39e-05	-0.771317	normal	Amino acid transport and metabolism	Biological Process: oligopeptide transport (GO:0006857);; Cellular Component: integral component of membrane (GO:0016021);; Molecular Function: transmembrane transporter activity (GO:0022857);;	K14638|7.6e-159|sind:105156148|K14638 solute carrier family 15 (peptide/histidine transporter), member 3/4 | (RefSeq) protein NRT1/ PTR FAMILY 8.3	Amino acid transport and metabolism	POT family	Protein NRT1/ PTR FAMILY 8.3 OS=Arabidopsis thaliana OX=3702 GN=NPF8.3 PE=1 SV=1	Amino acid transport and metabolism	Protein NRT1/ PTR FAMILY 8.3 like [Actinidia chinensis var. chinensis]
VaccDscaff1-augustus-gene-147.21	0.658598	0.538589	0.434598	1.32549	1.19303	1.45309	1.47226	1.52084	1.5901	0.355255	0.514388	0.287527	0.307716	0.409158	0.360955	0.24803	0.232371	0.017983	1.19e-05	1.22919	up	4.23e-09	1.59302	up	0.541215	-0.3251	normal	0.423385	-0.397166	normal	0.0615999	-1.25792	normal	Function unknown	Molecular Function: 4-hydroxybenzoate decaprenyltransferase activity (GO:0002083);; Biological Process: ubiquinone biosynthetic process (GO:0006744);; Biological Process: isoprenoid biosynthetic process (GO:0008299);; Cellular Component: integral component of mitochondrial inner membrane (GO:0031305);; Molecular Function: 4-hydroxybenzoate nonaprenyltransferase activity (GO:0047293);; Biological …	K15363|1.5e-63|bna:111210893|K15363 fanconi-associated nuclease 1 [EC:3.1.21.- 3.1.4.1] | (RefSeq) fanconi-associated nuclease 1 homolog	--	OPT oligopeptide transporter protein	Probable metal-nicotianamine transporter YSL7 OS=Arabidopsis thaliana OX=3702 GN=YSL7 PE=2 SV=1	Function unknown	hypothetical protein TEA_004635 [Camellia sinensis var. sinensis]
VaccDscaff1-augustus-gene-149.10	6.448	4.65783	7.40476	6.0011	6.14994	6.19599	2.97899	3.102	3.52294	21.9611	20.2904	18.0548	22.6591	24.3592	23.3536	36.0115	38.4009	33.5821	0.76914	0.103141	normal	0.00050915	-0.748867	normal	3.3e-27	1.79983	up	3.32e-36	2.05837	up	1.78e-67	2.6671	up	Carbohydrate transport and metabolism	Cellular Component: integral component of membrane (GO:0016021);; Molecular Function: transmembrane transporter activity (GO:0022857);;	K08193|3.1e-176|nsy:104249188|K08193 MFS transporter, ACS family, solute carrier family 17 (sodium-dependent inorganic phosphate cotransporter), other | (RefSeq) probable anion transporter 3, chloroplastic	Carbohydrate transport and metabolism	Major Facilitator Superfamily	Probable anion transporter 3, chloroplastic OS=Arabidopsis thaliana OX=3702 GN=ANTR3 PE=2 SV=2	Carbohydrate transport and metabolism	probable anion transporter 3, chloroplastic [Camellia sinensis]
VaccDscaff1-augustus-gene-150.12	1.58555	1.2916	1.56058	0.892739	0.942423	1.12853	1.27567	1.33299	2.52693	2.11866	2.1975	1.87516	3.20275	4.28692	3.03104	5.48102	3.72629	6.09491	0.383404	-0.386227	normal	0.408383	0.360931	normal	0.0611897	0.582715	normal	1.18e-06	1.35221	up	5.29e-13	1.87321	up	--	--	--	--	--	--	--	uncharacterized protein LOC114270909 [Camellia sinensis]
VaccDscaff1-augustus-gene-150.17	0.650426	0.678057	0.638587	0.361831	0.405624	0.350336	0.518443	0.344202	0.295606	0.40723	0.325302	0.318578	0.299962	0.287398	0.155307	0.257465	0.418669	0.326289	0.106985	-0.58863	normal	0.188019	-0.525406	normal	0.044677	-0.709168	normal	0.00541882	-1.13861	down	0.0368986	-0.782084	normal	Lipid transport and metabolism	Molecular Function: acetyl-CoA carboxylase activity (GO:0003989);; Cellular Component: cellular_component (GO:0005575);; Cellular Component: intracellular (GO:0005622);; Cellular Component: cell (GO:0005623);; Cellular Component: cytoplasm (GO:0005737);; Biological Process: fatty acid biosynthetic process (GO:0006633);; Cellular Component: acetyl-CoA carboxylase complex (GO:0009317);; Cellular Co…	K01962|3.7e-181|sly:101256513|K01962 acetyl-CoA carboxylase carboxyl transferase subunit alpha [EC:6.4.1.2 2.1.3.15] | (RefSeq) acetyl-coenzyme A carboxylase carboxyl transferase subunit alpha, chloroplastic	--	Acetyl co-enzyme A carboxylase carboxyltransferase alpha subunit	Acetyl-coenzyme A carboxylase carboxyl transferase subunit alpha, chloroplastic OS=Arabidopsis thaliana OX=3702 GN=CAC3 PE=1 SV=1	Lipid transport and metabolism	hypothetical protein C3L33_12533, partial [Rhododendron williamsianum]
VaccDscaff1-augustus-gene-152.15	4.32601	4.12747	2.72039	4.24575	3.91836	3.4495	10.1991	7.90946	9.28478	6.45163	6.57535	6.62165	5.49205	5.28138	6.1523	7.4352	5.1159	5.62413	0.651154	0.170084	normal	1.61e-13	1.44699	up	5.35e-06	0.924978	normal	0.00072797	0.744749	normal	0.000386479	0.83877	normal	Cell wall/membrane/envelope biogenesis	Molecular Function: protein kinase activity (GO:0004672);; Molecular Function: ATP binding (GO:0005524);;	K14500|1.6e-205|oeu:111375126|K14500 BR-signaling kinase [EC:2.7.11.1] | (RefSeq) probable serine/threonine-protein kinase At5g41260	--	Protein tyrosine and serine/threonine kinase	Serine/threonine-protein kinase BSK5 OS=Arabidopsis thaliana OX=3702 GN=BSK5 PE=1 SV=1	Signal transduction mechanisms	Serine/threonine-protein kinase [Actinidia chinensis var. chinensis]
VaccDscaff1-augustus-gene-16.36	9.90007	11.318	9.7586	14.2507	21.246	20.9062	37.7527	37.9158	32.292	16.095	16.133	15.4584	19.5416	15.4409	17.1618	20.8981	18.7858	17.2369	3.43e-10	0.955662	normal	1.78e-98	1.97629	up	7.05e-16	0.751629	normal	1.49e-14	0.908204	normal	3.34e-24	1.02673	up	Energy production and conversion	Molecular Function: ATP citrate synthase activity (GO:0003878);;	K01648|0.0e+00|rcu:8258819|K01648 ATP citrate (pro-S)-lyase [EC:2.3.3.8] | (RefSeq) ATP-citrate synthase beta chain protein 2	Energy production and conversion	Citrate synthase, C-terminal domain	ATP-citrate synthase beta chain protein 2 OS=Arabidopsis thaliana OX=3702 GN=ACLB-2 PE=1 SV=1	Energy production and conversion	ACL beta1 [Vaccinium corymbosum]
VaccDscaff1-augustus-gene-162.24	4.5889	4.68845	5.07158	25.3081	24.363	25.3933	11.5774	12.3653	12.8208	5.91373	5.25585	5.014	5.91475	5.91747	5.49006	2.13876	2.5622	2.51901	2.68e-177	2.48032	up	6.83e-48	1.53236	up	0.0456674	0.303376	normal	0.00338125	0.431303	normal	3.79e-07	-0.826421	normal	--	Molecular Function: catalytic activity (GO:0003824);; Cellular Component: cellular_component (GO:0005575);; Cellular Component: cell (GO:0005623);; Cellular Component: plasma membrane (GO:0005886);; Biological Process: multicellular organism development (GO:0007275);; Biological Process: biological_process (GO:0008150);; Cellular Component: membrane (GO:0016020);; Biological Process: multicellula…	K01102|3.5e-129|gmx:100794388|K01102 pyruvate dehydrogenase phosphatase [EC:3.1.3.43] | (RefSeq) probable protein phosphatase 2C 4	Signal transduction mechanisms	Protein phosphatase 2C	Probable protein phosphatase 2C 4 OS=Arabidopsis thaliana OX=3702 GN=PLL5 PE=2 SV=1	Signal transduction mechanisms	hypothetical protein C3L33_12487, partial [Rhododendron williamsianum]
VaccDscaff1-augustus-gene-163.30	5.09767	4.73344	5.53795	9.744	9.79171	9.67106	20.1871	18.5777	19.6054	11.3974	13.4295	13.3286	13.1145	12.2124	11.5527	12.5757	13.2913	11.747	3.38e-18	1.02742	up	2.99e-90	2.09635	up	1.7e-26	1.42878	up	4.04e-28	1.41421	up	4.76e-34	1.43511	up	Posttranslational modification, protein turnover, chaperones	Molecular Function: ATP binding (GO:0005524);;	K03283|0.0e+00|pavi:110756627|K03283 heat shock 70kDa protein 1/2/6/8 | (RefSeq) heat shock cognate 70 kDa protein 2	Posttranslational modification, protein turnover, chaperones	Hsp70 protein	Heat shock 70 kDa protein 1 OS=Arabidopsis thaliana OX=3702 GN=HSP70-1 PE=1 SV=3	Posttranslational modification, protein turnover, chaperones	hypothetical protein F0562_016737 [Nyssa sinensis]
VaccDscaff1-augustus-gene-169.17	0.400145	0.339478	0.507148	0.581108	0.720144	0.466505	2.51639	2.23625	2.164	0.993153	1.05023	1.10823	1.65045	1.719	1.1824	0.412547	0.395873	0.508383	0.367689	0.466305	normal	4.87e-20	2.5239	up	0.0001602	1.34174	up	4.19e-08	1.90716	up	--	--	--	--	Molecular Function: protein binding (GO:0005515);;	--	--	F-box domain	FBD-associated F-box protein At5g22730 OS=Arabidopsis thaliana OX=3702 GN=At5g22730 PE=2 SV=2	Function unknown	hypothetical protein C3L33_12456, partial [Rhododendron williamsianum]
VaccDscaff1-augustus-gene-176.29	11.5098	7.73969	10.643	7.30714	2.53646	5.46959	22.1064	21.7833	25.573	6.94314	9.16853	10.4815	5.45571	4.87394	5.61813	0.475324	1.33071	2.5116	0.0342629	-0.7217	normal	1.08e-16	1.37609	up	0.924016	-0.0344617	normal	0.000833028	-0.729422	normal	0.000170964	-2.22023	down	Inorganic ion transport and metabolism	Molecular Function: peroxidase activity (GO:0004601);; Biological Process: response to oxidative stress (GO:0006979);; Molecular Function: heme binding (GO:0020037);;	K00434|4.8e-81|cann:107842932|K00434 L-ascorbate peroxidase [EC:1.11.1.11] | (RefSeq) L-ascorbate peroxidase 2, cytosolic	--	Peroxidase	L-ascorbate peroxidase 2, cytosolic OS=Arabidopsis thaliana OX=3702 GN=APX2 PE=2 SV=3	Energy production and conversion	L-ascorbate peroxidase, cytosolic isoform X1 [Cinnamomum micranthum f. kanehirae]
VaccDscaff1-augustus-gene-178.22	1.38839	1.18412	1.44125	1.56347	1.14643	1.05349	0.70691	1.00091	1.19708	0.961231	0.608333	0.884344	0.444787	0.193393	0.378208	0.553604	0.642816	0.468026	0.968301	0.0253363	normal	0.486058	-0.272199	normal	0.126691	-0.543975	normal	2.78e-05	-1.66117	down	0.00146492	-1.0716	down	--	Molecular Function: molecular_function (GO:0003674);; Molecular Function: binding (GO:0005488);; Molecular Function: protein binding (GO:0005515);; Cellular Component: cellular_component (GO:0005575);; Cellular Component: intracellular (GO:0005622);; Cellular Component: cell (GO:0005623);; Cellular Component: nucleus (GO:0005634);; Cellular Component: cytoskeleton (GO:0005856);; Cellular Componen…	--	--	Protein of unknown function (DUF4005)	Protein IQ-DOMAIN 1 OS=Arabidopsis thaliana OX=3702 GN=IQD1 PE=1 SV=1	Function unknown	hypothetical protein C3L33_12423, partial [Rhododendron williamsianum]
VaccDscaff1-augustus-gene-18.40	1.24833	1.08165	1.11488	1.61074	1.41575	1.60019	5.47932	5.36547	5.97078	4.85647	3.2698	3.58021	4.06089	4.33377	4.62493	6.31773	5.78967	5.77479	0.0540514	0.511707	normal	3.57e-55	2.43279	up	1.63e-19	1.84084	up	1.21e-31	2.04474	up	3.88e-60	2.50017	up	Coenzyme transport and metabolism	Cellular Component: cellular_component (GO:0005575);; Cellular Component: intracellular (GO:0005622);; Cellular Component: cell (GO:0005623);; Cellular Component: cytoplasm (GO:0005737);; Cellular Component: cytosol (GO:0005829);; Cellular Component: intracellular part (GO:0044424);; Cellular Component: cytoplasmic part (GO:0044444);; Cellular Component: cell part (GO:0044464);;	K20896|4.6e-86|sot:102592180|K20896 formylaminopyrimidine deformylase / aminopyrimidine aminohydrolase [EC:3.5.1.- 3.5.99.-] | (RefSeq) probable bifunctional TENA-E protein	--	TENA/THI-4/PQQC family	Probable bifunctional TENA-E protein OS=Glycine max OX=3847 GN=TENA_E PE=2 SV=1	Transcription	hypothetical protein C3L33_12971, partial [Rhododendron williamsianum]
VaccDscaff1-augustus-gene-18.51	0.382644	0.720208	0.499617	0.511209	0.382906	0.506663	0.726554	0.708742	0.685333	1.09391	0.723428	1.06514	2.64247	3.22274	2.35619	2.61553	1.89831	2.51415	--	--	--	0.310301	0.519325	normal	0.0674238	0.851397	normal	1.89e-12	2.36608	up	3.46e-10	2.15172	up	--	Biological Process: polysaccharide catabolic process (GO:0000272);; Molecular Function: pattern binding (GO:0001871);; Biological Process: defense response to nematode (GO:0002215);; Biological Process: immune system process (GO:0002376);; Molecular Function: molecular_function (GO:0003674);; Molecular Function: catalytic activity (GO:0003824);; Molecular Function: hydrolase activity, hydrolyzing…	K19891|1.4e-52|ath:AT2G01630|K19891 glucan endo-1,3-beta-glucosidase 1/2/3 [EC:3.2.1.39] | (RefSeq) O-Glycosyl hydrolases family 17 protein	--	Glycosyl hydrolases family 17	Lichenase OS=Nicotiana plumbaginifolia OX=4092 GN=GN1 PE=2 SV=3	Carbohydrate transport and metabolism	hypothetical protein C3L33_12968, partial [Rhododendron williamsianum]
VaccDscaff1-augustus-gene-185.22	3.98949	4.71759	3.70266	2.30568	3.09608	2.52772	3.97032	4.58331	4.38098	22.9179	21.791	21.1054	19.4603	16.9431	18.9178	21.0752	20.0271	21.0613	0.0161853	-0.497767	normal	0.159607	0.241388	normal	6.36e-135	2.52072	up	3.57e-88	2.30186	up	3.24e-134	2.46591	up	Amino acid transport and metabolism	Biological Process: response to acid chemical (GO:0001101);; Molecular Function: molecular_function (GO:0003674);; Molecular Function: catalytic activity (GO:0003824);; Cellular Component: cellular_component (GO:0005575);; Cellular Component: intracellular (GO:0005622);; Cellular Component: cell (GO:0005623);; Cellular Component: cytoplasm (GO:0005737);; Cellular Component: cytosol (GO:0005829);;…	K10775|0.0e+00|dcr:108217754|K10775 phenylalanine ammonia-lyase [EC:4.3.1.24] | (RefSeq) phenylalanine ammonia-lyase 3	Secondary metabolites biosynthesis, transport and catabolism	Aromatic amino acid lyase	Phenylalanine ammonia-lyase OS=Camellia sinensis OX=4442 GN=PAL PE=2 SV=1	Secondary metabolites biosynthesis, transport and catabolism	hypothetical protein C3L33_12401, partial [Rhododendron williamsianum]
VaccDscaff1-augustus-gene-186.19	2.47426	2.89165	2.37814	1.2835	1.77865	1.44348	1.8254	1.95693	2.32874	8.1738	9.38456	7.7336	8.30047	7.65956	7.75182	8.56376	8.61733	8.54452	0.00893248	-0.617497	normal	0.5292	-0.155108	normal	2.9e-35	1.81512	up	7.09e-38	1.75813	up	2.16e-52	1.87047	up	Amino acid transport and metabolism	Biological Process: response to acid chemical (GO:0001101);; Molecular Function: molecular_function (GO:0003674);; Molecular Function: catalytic activity (GO:0003824);; Cellular Component: cellular_component (GO:0005575);; Cellular Component: intracellular (GO:0005622);; Cellular Component: cell (GO:0005623);; Cellular Component: cytoplasm (GO:0005737);; Cellular Component: cytosol (GO:0005829);;…	K10775|0.0e+00|dcr:108217754|K10775 phenylalanine ammonia-lyase [EC:4.3.1.24] | (RefSeq) phenylalanine ammonia-lyase 3	Secondary metabolites biosynthesis, transport and catabolism	Aromatic amino acid lyase	Phenylalanine ammonia-lyase OS=Camellia sinensis OX=4442 GN=PAL PE=2 SV=1	Secondary metabolites biosynthesis, transport and catabolism	hypothetical protein C3L33_12401, partial [Rhododendron williamsianum]
VaccDscaff1-augustus-gene-187.25	4.81468	5.52975	4.83646	3.20042	3.17829	3.03972	4.44226	4.96926	4.7472	15.4676	15.5704	15.4984	15.8322	14.7687	14.8951	15.3967	15.9781	14.8121	0.000236153	-0.546073	normal	0.621221	0.0853866	normal	2.76e-69	1.73855	up	1.17e-59	1.73702	up	4.09e-71	1.75195	up	Amino acid transport and metabolism	Biological Process: response to acid chemical (GO:0001101);; Molecular Function: molecular_function (GO:0003674);; Molecular Function: catalytic activity (GO:0003824);; Cellular Component: cellular_component (GO:0005575);; Cellular Component: intracellular (GO:0005622);; Cellular Component: cell (GO:0005623);; Cellular Component: cytoplasm (GO:0005737);; Cellular Component: cytosol (GO:0005829);;…	K10775|0.0e+00|dcr:108217754|K10775 phenylalanine ammonia-lyase [EC:4.3.1.24] | (RefSeq) phenylalanine ammonia-lyase 3	Secondary metabolites biosynthesis, transport and catabolism	Aromatic amino acid lyase	Phenylalanine ammonia-lyase OS=Camellia sinensis OX=4442 GN=PAL PE=2 SV=1	Secondary metabolites biosynthesis, transport and catabolism	hypothetical protein C3L33_12401, partial [Rhododendron williamsianum]
VaccDscaff1-augustus-gene-188.24	1.12484	0.308024	0.690561	0.858882	0.598449	0.585787	2.27661	1.41262	1.64569	4.07928	4.43481	6.04093	4.91042	4.86856	3.35066	3.97028	5.32267	5.08542	--	--	--	0.0156626	1.27473	normal	1.69e-10	2.56619	up	4.58e-09	2.52022	up	6.48e-11	2.67313	up	Energy production and conversion	--	K01512|8.5e-41|nsy:104232143|K01512 acylphosphatase [EC:3.6.1.7] | (RefSeq) uncharacterized protein LOC104232143	Energy production and conversion	Acylphosphatase	--	Energy production and conversion	hypothetical protein C3L33_12388, partial [Rhododendron williamsianum]
VaccDscaff1-augustus-gene-189.21	4.71916	4.49189	4.02403	11.9929	14.5382	13.005	15.6861	15.9493	15.0518	11.4439	11.7744	13.2378	10.0882	11.5993	10.6768	11.947	11.6403	9.25424	1.22e-33	1.64702	up	7.91e-65	1.98318	up	3.66e-30	1.57203	up	4.32e-23	1.4344	up	5.35e-21	1.44624	up	--	Molecular Function: molecular_function (GO:0003674);; Molecular Function: binding (GO:0005488);; Molecular Function: copper ion binding (GO:0005507);; Cellular Component: cellular_component (GO:0005575);; Cellular Component: intracellular (GO:0005622);; Cellular Component: cell (GO:0005623);; Cellular Component: cytoplasm (GO:0005737);; Biological Process: transport (GO:0006810);; Biological Proc…	--	Inorganic ion transport and metabolism	Heavy-metal-associated domain	Heavy metal-associated isoprenylated plant protein 3 OS=Arabidopsis thaliana OX=3702 GN=HIPP03 PE=1 SV=1	Inorganic ion transport and metabolism	hypothetical protein C3L33_12387, partial [Rhododendron williamsianum]
VaccDscaff1-augustus-gene-20.21	4.78456	4.58654	4.40866	3.42509	2.93274	3.32141	2.41942	2.71561	2.37632	2.57137	2.69501	2.81503	1.85958	1.96489	2.14906	1.91942	1.63262	1.79557	0.0349919	-0.368307	normal	1.28e-05	-0.68016	normal	6.43e-05	-0.629198	normal	5.19e-10	-1.03392	down	9.32e-14	-1.19474	down	Lipid transport and metabolism;; Secondary metabolites biosynthesis, transport and catabolism	Molecular Function: molecular_function (GO:0003674);; Molecular Function: catalytic activity (GO:0003824);; Molecular Function: acetate-CoA ligase activity (GO:0003987);; Cellular Component: cellular_component (GO:0005575);; Cellular Component: intracellular (GO:0005622);; Cellular Component: cell (GO:0005623);; Cellular Component: cytoplasm (GO:0005737);; Cellular Component: peroxisome (GO:00057…	K01913|2.8e-289|vvi:100267152|K01913 acetate/butyrate---CoA ligase [EC:6.2.1.1 6.2.1.2] | (RefSeq) acetate/butyrate--CoA ligase AAE7, peroxisomal	Lipid transport and metabolism	AMP-binding enzyme	Acetate/butyrate--CoA ligase AAE7, peroxisomal OS=Arabidopsis thaliana OX=3702 GN=AAE7 PE=1 SV=1	Lipid transport and metabolism	hypothetical protein C3L33_12958, partial [Rhododendron williamsianum]
VaccDscaff1-augustus-gene-20.28	0.571057	1.03268	0.784367	0.517474	0.554532	0.371454	0.637116	0.431163	0.473562	0.303082	0.3494	0.202724	0.167771	0.060144	0.118986	0.148352	0.392723	0.080949	0.248326	-0.494656	normal	0.319042	-0.408391	normal	0.00223026	-1.20652	down	1.93e-07	-2.32535	down	0.00278536	-1.58401	down	--	--	--	--	Domain of unknown function (DUF4378)	--	Function unknown	uncharacterized protein LOC114269402 [Camellia sinensis]
VaccDscaff1-augustus-gene-21.20	1.86782	1.02999	1.34856	1.42939	1.01077	1.34268	1.2223	1.30288	1.20515	0.502183	0.474538	0.831889	0.591242	1.08954	0.681738	0.372915	0.318968	0.248019	0.965629	-0.0322729	normal	0.994277	-0.00402131	normal	0.0291779	-0.987723	normal	0.210999	-0.610869	normal	6.24e-05	-1.80793	down	--	Molecular Function: transcription regulatory region sequence-specific DNA binding (GO:0000976);; Molecular Function: RNA polymerase II regulatory region sequence-specific DNA binding (GO:0000977);; Molecular Function: RNA polymerase II transcription factor activity, sequence-specific DNA binding (GO:0000981);; Molecular Function: RNA polymerase II regulatory region DNA binding (GO:0001012);; Mole…	K21630|3.1e-06|cmax:111478040|K21630 GATA-type zinc finger protein 1 | (RefSeq) GATA transcription factor 6-like	Transcription	GATA zinc finger	GATA transcription factor 15 OS=Arabidopsis thaliana OX=3702 GN=GATA15 PE=2 SV=2	Transcription	hypothetical protein C3L33_12948, partial [Rhododendron williamsianum]
VaccDscaff1-augustus-gene-210.33	1.76306	3.845	3.34441	1.69274	1.47653	1.95851	1.86874	1.60015	1.26567	7.7385	12.4919	12.3386	12.6971	10.369	12.4128	17.7186	12.7897	16.3158	0.16471	-0.562413	normal	0.0828402	-0.680053	normal	7.16e-11	1.89491	up	4.06e-16	2.08136	up	7.89e-23	2.47017	up	--	--	--	Amino acid transport and metabolism	Serine hydrolase (FSH1)	Rhodanese-like domain-containing protein 6 OS=Arabidopsis thaliana OX=3702 GN=STR6 PE=2 SV=1	Amino acid transport and metabolism	dihydrofolate reductase-like isoform X1 [Camellia sinensis]
VaccDscaff1-augustus-gene-212.15	1.13556	1.34434	0.7363	0.68246	0.428227	0.624421	0.392969	0.259654	0.360661	0.16602	0.392651	0.375524	0.145114	0.147313	0.040136	0	0.096523	0.198619	0.0913658	-0.634968	normal	0.000130232	-1.37692	down	0.00042665	-1.46072	down	1.41e-09	-2.72136	down	0.0287057	-1.86064	normal	--	Biological Process: amino acid transmembrane transport (GO:0003333);; Cellular Component: plasma membrane (GO:0005886);; Molecular Function: amino acid transmembrane transporter activity (GO:0015171);; Cellular Component: integral component of membrane (GO:0016021);;	K13946|1.5e-262|nta:107819848|K13946 auxin influx carrier (AUX1 LAX family) | (RefSeq) auxin transporter-like protein 2	Amino acid transport and metabolism	Transmembrane amino acid transporter protein	Auxin transporter-like protein 2 OS=Medicago truncatula OX=3880 GN=LAX2 PE=2 SV=1	Amino acid transport and metabolism	PREDICTED: auxin transporter-like protein 4 isoform X1 [Nicotiana tabacum]
VaccDscaff1-augustus-gene-22.33	22.7717	24.7762	21.7198	19.9673	9.34098	22.7359	34.9302	20.7061	37.1667	15.6644	13.2834	15.2203	13.7486	16.4177	12.7473	4.9869	5.00557	6.61739	0.482129	-0.261341	normal	0.00404697	0.595298	normal	3.16e-05	-0.5122	normal	0.00086698	-0.519612	normal	5e-34	-1.87998	down	--	Molecular Function: protein phosphatase inhibitor activity (GO:0004864);; Biological Process: defense response (GO:0006952);; Biological Process: abscisic acid-activated signaling pathway (GO:0009738);; Molecular Function: abscisic acid binding (GO:0010427);; Molecular Function: signaling receptor activity (GO:0038023);;	--	--	Pathogenesis-related protein Bet v 1 family	Major allergen Pru ar 1 OS=Prunus armeniaca OX=36596 PE=1 SV=1	Function unknown	Major allergen Pru ar like [Actinidia chinensis var. chinensis]
VaccDscaff1-augustus-gene-22.34	67.8525	64.0656	69.4359	54.1015	61.4039	65.8895	159.265	137.738	145.343	59.3173	73.0827	67.2535	72.36	91.8319	67.0482	20.9779	18.9957	17.2872	0.906496	-0.0263573	normal	5.92e-54	1.31417	up	0.4159	0.121348	normal	0.0158621	0.360102	normal	7.54e-59	-1.65358	down	--	Molecular Function: protein phosphatase inhibitor activity (GO:0004864);; Biological Process: defense response (GO:0006952);; Biological Process: abscisic acid-activated signaling pathway (GO:0009738);; Molecular Function: abscisic acid binding (GO:0010427);; Molecular Function: signaling receptor activity (GO:0038023);;	--	--	Pathogenesis-related protein Bet v 1 family	Major allergen Pru ar 1 OS=Prunus armeniaca OX=36596 PE=1 SV=1	Function unknown	Major allergen Pru ar like [Actinidia chinensis var. chinensis]
VaccDscaff1-augustus-gene-22.44	17.8755	18.0858	14.1102	35.1103	41.7292	42.1641	124.297	125.394	118.326	18.2697	18.0304	15.5065	11.0896	12.4428	9.21213	3.52466	3.08442	2.68935	1.63e-19	1.32429	up	9.23e-189	3.03838	up	0.416489	0.180319	normal	0.0610099	-0.436264	normal	9.96e-23	-2.2213	down	--	Biological Process: defense response (GO:0006952);;	--	--	Pathogenesis-related protein Bet v 1 family	Major allergen Pru ar 1 OS=Prunus armeniaca OX=36596 PE=1 SV=1	Function unknown	hypothetical protein C3L33_12944, partial [Rhododendron williamsianum]
VaccDscaff1-augustus-gene-233.17	1.38977	1.14004	0.484893	0.606875	2.70204	0.510138	0.608377	0.312843	0.486555	0.619469	1.63396	1.7619	0.780611	0.250044	1.4868	1.3043	2.01745	2.73005	0.66882	0.3005	normal	0.102826	-0.800486	normal	0.373363	0.486516	normal	0.897628	-0.097262	normal	0.00946786	1.08549	up	Coenzyme transport and metabolism	Biological Process: chlorophyll biosynthetic process (GO:0015995);; Cellular Component: integral component of membrane (GO:0016021);; Molecular Function: chlorophyll synthetase activity (GO:0046408);;	K04040|2.1e-155|cmo:103502144|K04040 chlorophyll/bacteriochlorophyll a synthase [EC:2.5.1.62 2.5.1.133] | (RefSeq) chlorophyll synthase, chloroplastic	--	UbiA prenyltransferase family	Chlorophyll synthase, chloroplastic OS=Oryza sativa subsp. japonica OX=39947 GN=CHLG PE=2 SV=1	Coenzyme transport and metabolism	homogentisate solanesyltransferase, chloroplastic-like [Rhododendron dauricum]
VaccDscaff1-augustus-gene-234.26	0.789871	0.72767	0.671911	0.551962	0.66181	0.193944	0.149063	0.264011	0.411678	0.44194	0.258767	0.402543	0.528996	0.547213	0.717511	0.23254	0.414204	0.625754	0.40772	-0.410949	normal	0.00157406	-1.13363	down	0.00439437	-0.816256	normal	0.696305	-0.123917	normal	0.128907	-0.594388	normal	Translation, ribosomal structure and biogenesis	Cellular Component: chloroplast (GO:0009507);; Biological Process: response to abscisic acid (GO:0009737);; Molecular Function: metal ion binding (GO:0046872);; Molecular Function: metalloaminopeptidase activity (GO:0070006);; Biological Process: protein initiator methionine removal (GO:0070084);;	K01265|1.9e-128|csv:101204976|K01265 methionyl aminopeptidase [EC:3.4.11.18] | (RefSeq) methionine aminopeptidase 1D, chloroplastic/mitochondrial isoform X1	Posttranslational modification, protein turnover, chaperones	Metallopeptidase family M24	Methionine aminopeptidase 1D, chloroplastic/mitochondrial OS=Arabidopsis thaliana OX=3702 GN=MAP1D PE=1 SV=1	Posttranslational modification, protein turnover, chaperones	Methionine aminopeptidase [Actinidia chinensis var. chinensis]
VaccDscaff1-augustus-gene-236.29	0.036256	0	0.022797	0.200289	0.423322	0.347626	0.748243	0.653178	0.715487	0.179239	0.226775	0.026026	0	0.139065	0.083007	0.080973	0	0	--	--	--	2.31e-11	3.74791	up	--	--	--	--	--	--	--	--	--	Inorganic ion transport and metabolism	Cellular Component: integral component of plasma membrane (GO:0005887);; Molecular Function: ammonium transmembrane transporter activity (GO:0008519);;	K03320|4.0e-252|zju:107405371|K03320 ammonium transporter, Amt family | (RefSeq) ammonium transporter 2-like	Inorganic ion transport and metabolism	Ammonium Transporter Family	Ammonium transporter 3 member 1 OS=Oryza sativa subsp. japonica OX=39947 GN=AMT3-1 PE=2 SV=1	Inorganic ion transport and metabolism	hypothetical protein F0562_015198 [Nyssa sinensis]
VaccDscaff1-augustus-gene-237.24	3.92798	3.77911	4.75455	6.31827	4.2563	6.59618	8.77781	7.85019	9.2562	5.58266	6.75471	5.53005	5.4633	6.93439	6.41958	4.30064	3.77244	5.71185	0.054904	0.536455	normal	8.95e-11	1.21253	up	0.00647444	0.634831	normal	0.00123848	0.736337	normal	0.314324	0.295745	normal	--	--	--	--	Protein of unknown function, DUF538	Uncharacterized protein At5g01610 OS=Arabidopsis thaliana OX=3702 GN=At5g01610 PE=1 SV=1	Function unknown	uncharacterized protein At5g01610-like [Camellia sinensis]
VaccDscaff1-augustus-gene-238.33	0.194512	0.59009	0.084744	0.139317	0.146294	0.032966	0.124937	1.37728	0.977729	1.26384	0.250383	0.286341	0.942029	0.773919	0.167277	1.30446	1.085	1.36738	--	--	--	--	--	--	--	--	--	--	--	--	0.000766626	1.91661	up	--	--	--	Function unknown	Protein of unknown function (DUF1640)	--	Function unknown	hypothetical protein C3L33_20779, partial [Rhododendron williamsianum]
VaccDscaff1-augustus-gene-239.30	1.23983	1.43076	1.35456	1.21961	0.818356	1.0498	0.607766	0.630256	0.69816	0.61321	0.499756	0.373128	0.219297	0.148087	0.091431	0.275319	0.402454	0.196991	0.567811	-0.226821	normal	0.00183552	-0.829733	normal	3.74e-05	-1.21686	down	1.91e-13	-2.72454	down	8.21e-09	-1.9394	down	Cell wall/membrane/envelope biogenesis	Molecular Function: protein kinase activity (GO:0004672);; Molecular Function: protein binding (GO:0005515);; Molecular Function: ATP binding (GO:0005524);; Cellular Component: cellular_component (GO:0005575);; Cellular Component: cell wall (GO:0005618);; Cellular Component: cell (GO:0005623);; Cellular Component: plasma membrane (GO:0005886);; Cellular Component: cell-cell junction (GO:0005911);…	K20359|1.5e-138|eus:EUTSA_v10006389mg|K20359 PRA1 family protein 1 | (RefSeq) hypothetical protein	--	Protein kinase domain	Probable leucine-rich repeat receptor-like protein kinase IMK3 OS=Arabidopsis thaliana OX=3702 GN=IMK3 PE=1 SV=1	Signal transduction mechanisms	hypothetical protein C3L33_22570, partial [Rhododendron williamsianum]
VaccDscaff1-augustus-gene-241.25	10.4505	8.22504	9.4471	13.165	14.7843	15.5317	20.6444	21.2977	22.5776	8.51963	7.44747	8.12161	10.6761	10.0144	11.6167	6.34062	5.07094	5.86616	1.17e-07	0.730881	normal	1.66e-32	1.37028	up	0.63767	-0.091717	normal	0.0199344	0.355854	normal	0.000769174	-0.542551	normal	Secondary metabolites biosynthesis, transport and catabolism;; Defense mechanisms	Molecular Function: monooxygenase activity (GO:0004497);; Molecular Function: iron ion binding (GO:0005506);; Molecular Function: oxidoreductase activity, acting on paired donors, with incorporation or reduction of molecular oxygen (GO:0016705);; Molecular Function: heme binding (GO:0020037);;	K20667|5.5e-209|qsu:112003765|K20667 beta-amyrin 28-monooxygenase [EC:1.14.14.126] | (RefSeq) beta-amyrin 28-oxidase-like isoform X1	Secondary metabolites biosynthesis, transport and catabolism;; Lipid transport and metabolism	Cytochrome P450	Beta-amyrin 28-monooxygenase OS=Vitis vinifera OX=29760 GN=CYP716A17 PE=1 SV=2	Secondary metabolites biosynthesis, transport and catabolism	Beta-amyrin 28-oxidase [Actinidia chinensis var. chinensis]
VaccDscaff1-augustus-gene-253.29	0.304538	0.390204	0.467866	0.357249	0.386389	0.673357	0.883229	0.835584	0.825724	1.23968	0.834849	0.672722	0.60076	0.572929	0.789343	0.748531	0.599551	0.549366	--	--	--	0.00192156	1.2027	up	0.00319319	1.23204	up	0.070704	0.839345	normal	0.0868072	0.787734	normal	--	Molecular Function: nucleic acid binding (GO:0003676);; Cellular Component: nucleus (GO:0005634);; Biological Process: transcription, DNA-templated (GO:0006351);; Biological Process: regulation of transcription, DNA-templated (GO:0006355);; Molecular Function: zinc ion binding (GO:0008270);;	K03145|2.8e-113|vvi:100263760|K03145 transcription elongation factor S-II | (RefSeq) transcription elongation factor TFIIS	Transcription	Transcription factor S-II (TFIIS), central domain	Transcription elongation factor TFIIS OS=Arabidopsis thaliana OX=3702 GN=TFIIS PE=1 SV=1	Transcription	hypothetical protein F0562_015108 [Nyssa sinensis]
VaccDscaff1-augustus-gene-254.25	1.71668	2.18125	1.72737	1.97589	1.68043	1.73687	0.785194	1.2962	1.16366	0.738916	0.98905	0.57443	0.329726	0.815866	0.787635	0.481254	0.410709	0.849303	0.914699	0.0606489	normal	0.129464	-0.564097	normal	0.00424226	-1.06022	down	0.00344369	-1.25534	down	0.000407809	-1.40906	down	--	--	--	--	--	--	Function unknown	hypothetical protein C3L33_12266, partial [Rhododendron williamsianum]
VaccDscaff1-augustus-gene-257.21	1.63147	1.95726	2.04461	1.27361	1.3858	2.06893	0.52015	0.176624	0.576928	0.201505	0.120211	0.331858	0.272957	0.249592	0.090388	0	0.253965	0.10303	0.880051	-0.0977012	normal	0.00016803	-1.72162	down	1.34e-08	-2.52995	down	5.97e-08	-2.61639	down	6.38e-08	-3.12979	down	--	--	--	--	LURP-one-related	--	Function unknown	hypothetical protein C3L33_12254, partial [Rhododendron williamsianum]
VaccDscaff1-augustus-gene-260.30	2.70106	3.21608	2.75797	1.83605	1.83172	1.85006	1.40022	1.69245	1.53419	1.4185	1.28115	1.74088	1.0135	0.820989	1.20545	1.16673	1.17141	0.924077	0.00840364	-0.502514	normal	0.000165996	-0.704853	normal	5.86e-05	-0.816139	normal	6.35e-10	-1.32395	down	7.07e-10	-1.23357	down	--	--	--	Posttranslational modification, protein turnover, chaperones	--	--	Posttranslational modification, protein turnover, chaperones	hypothetical protein C3L33_12240, partial [Rhododendron williamsianum]
VaccDscaff1-augustus-gene-270.26	0.911262	1.35184	1.25363	1.37361	0.796865	1.28927	0.438588	0.588332	0.759682	0.755259	0.453572	0.687467	0	0.209145	0.260956	0.276736	0.267546	0.179315	0.876483	0.0943793	normal	0.0515262	-0.728704	normal	0.0597802	-0.699155	normal	0.0788	-1.48611	normal	2.28e-07	-1.97731	down	--	Molecular Function: GTPase activity (GO:0003924);; Molecular Function: structural constituent of cytoskeleton (GO:0005200);; Molecular Function: GTP binding (GO:0005525);; Cellular Component: cytoplasm (GO:0005737);; Cellular Component: microtubule (GO:0005874);; Biological Process: microtubule-based process (GO:0007017);;	K07375|7.9e-263|sind:105159935|K07375 tubulin beta | (RefSeq) tubulin beta-5 chain	Cytoskeleton	Tubulin/FtsZ family, GTPase domain	Tubulin beta-1 chain OS=Oryza sativa subsp. japonica OX=39947 GN=TUBB1 PE=2 SV=2	Cytoskeleton	hypothetical protein F0562_015396 [Nyssa sinensis]
VaccDscaff1-augustus-gene-271.13	3.39183	3.06616	2.69851	5.04158	6.06879	4.90968	6.25413	6.13377	6.90548	4.94212	4.10809	4.53361	3.38003	4.11393	5.49601	4.22366	4.13979	4.18025	7.3e-09	0.895419	normal	1.4e-21	1.24531	up	3.66e-06	0.689526	normal	0.00180665	0.648427	normal	3.03e-05	0.601912	normal	--	Cellular Component: nucleus (GO:0005634);;	--	--	TFIIS helical bundle-like domain	Probable mediator of RNA polymerase II transcription subunit 26b OS=Arabidopsis thaliana OX=3702 GN=MED26B PE=2 SV=1	Transcription	hypothetical protein C3L33_12219, partial [Rhododendron williamsianum]
VaccDscaff1-augustus-gene-273.42	0.608653	0.588156	0.441961	0.424544	0.411879	0.426549	0.865001	0.477246	1.00661	2.03004	1.76153	1.73266	2.20096	1.67797	2.00378	3.01935	3.24679	3.17386	0.714182	-0.204814	normal	0.108558	0.65196	normal	3.52e-14	1.8074	up	1.21e-14	1.94012	up	4.33e-38	2.61865	up	--	Molecular Function: protein binding (GO:0005515);;	--	--	F-box domain	F-box protein At2g26850 OS=Arabidopsis thaliana OX=3702 GN=At2g26850 PE=2 SV=1	Function unknown	hypothetical protein C3L33_12212, partial [Rhododendron williamsianum]
VaccDscaff1-augustus-gene-278.21	0.677625	1.18424	0.877873	0	0.681171	0.310261	0.006701	0.784086	0	0.158897	0.049186	0.182897	0.460312	0.189864	0.367201	0.196322	0	0.598514	0.637136	-0.276502	normal	0.552928	-0.495769	normal	1.38e-05	-2.15771	down	0.0284515	-1.10534	normal	0.118548	-1.21108	normal	--	Molecular Function: ubiquitin-protein transferase activity (GO:0004842);; Molecular Function: metal ion binding (GO:0046872);;	K11968|5.8e-219|lsv:111918223|K11968 ariadne-1 [EC:2.3.2.31] | (RefSeq) probable E3 ubiquitin-protein ligase ARI2	Posttranslational modification, protein turnover, chaperones	IBR domain, a half RING-finger domain	Probable E3 ubiquitin-protein ligase ARI2 OS=Arabidopsis thaliana OX=3702 GN=ARI2 PE=2 SV=1	Posttranslational modification, protein turnover, chaperones	E3 ubiquitin-protein like [Actinidia chinensis var. chinensis]
VaccDscaff1-augustus-gene-278.26	0.193029	0.405004	0.214628	0.24923	0.335136	0.30241	0.261932	0.260355	0.333875	0.444508	0.444933	0.440899	0.283508	0.694178	0.966671	0.877491	1.03497	0.731621	--	--	--	--	--	--	--	--	--	--	--	--	0.00169206	1.61149	up	--	--	--	--	--	--	--	unnamed protein product [Digitaria exilis]
VaccDscaff1-augustus-gene-279.11	1.65457	0.736383	1.25345	1.46857	0.940735	1.21822	1.48001	1.57503	1.66701	1.40751	1.71366	1.24577	2.7853	2.87116	2.22616	2.53701	1.57644	3.06788	0.87523	0.0988088	normal	0.12579	0.527951	normal	0.354872	0.368373	normal	6.04e-05	1.22293	up	0.00196289	1.07859	up	--	Cellular Component: nucleus (GO:0005634);;	K14788|5.7e-308|vvi:100257259|K14788 ribosome biogenesis protein ENP2 | (RefSeq) nucleolar protein 10	General function prediction only	NUC153 domain	--	Translation, ribosomal structure and biogenesis	hypothetical protein F0562_017490 [Nyssa sinensis]
VaccDscaff1-augustus-gene-280.22	0.512185	0.321249	0.317582	1.19532	1.10022	0.969989	1.25738	1.43463	1.17041	1.23626	1.13791	1.12217	1.94018	1.82359	1.37134	1.42795	1.52168	1.28954	0.00455076	1.17168	up	8.21e-05	1.71818	up	0.00080373	1.51252	up	9.5e-07	2.1102	up	1.71e-05	1.87044	up	--	Biological Process: mitochondrial fission (GO:0000266);; Cellular Component: mitochondrial outer membrane (GO:0005741);; Cellular Component: integral component of membrane (GO:0016021);; Biological Process: peroxisome fission (GO:0016559);;	K17969|3.9e-74|tcc:18598795|K17969 mitochondrial fission 1 protein | (RefSeq) mitochondrial fission 1 protein A	Cell wall/membrane/envelope biogenesis	Fis1 C-terminal tetratricopeptide repeat	Mitochondrial fission 1 protein A OS=Arabidopsis thaliana OX=3702 GN=FIS1A PE=1 SV=1	Cell wall/membrane/envelope biogenesis	Mitochondrial fission 1 protein like [Actinidia chinensis var. chinensis]
VaccDscaff1-augustus-gene-282.19	0.616847	0.497005	0.551837	0.43938	0.500424	0.47917	0.723567	0.05061	0.747029	0.888047	0.770305	0.113606	1.02222	1.00824	1.08894	1.00798	0.848679	1.15628	0.88095	-0.0882096	normal	0.960291	0.0425521	normal	0.797981	0.186522	normal	8.44e-05	1.03288	up	0.00034162	0.980302	normal	General function prediction only	Molecular Function: molecular_function (GO:0003674);; Molecular Function: catalytic activity (GO:0003824);; Molecular Function: triglyceride lipase activity (GO:0004806);; Cellular Component: cellular_component (GO:0005575);; Cellular Component: intracellular (GO:0005622);; Cellular Component: cell (GO:0005623);; Cellular Component: lipid droplet (GO:0005811);; Biological Process: lipid metabolic…	K14674|0.0e+00|vvi:100258980|K14674 TAG lipase / steryl ester hydrolase / phospholipase A2 / LPA acyltransferase [EC:3.1.1.3 3.1.1.13 3.1.1.4 2.3.1.51] | (RefSeq) triacylglycerol lipase SDP1	General function prediction only	Domain of unknown function (DUF3336)	Triacylglycerol lipase SDP1 OS=Arabidopsis thaliana OX=3702 GN=SDP1 PE=1 SV=1	Lipid transport and metabolism	hypothetical protein C3L33_12183, partial [Rhododendron williamsianum]
VaccDscaff1-augustus-gene-286.15	7.59683	8.8256	8.01426	9.37765	9.6821	8.09218	18.7892	21.4528	20.7576	18.9126	17.9508	16.7886	21.906	19.2075	25.2699	17.324	18.8581	17.4199	0.0353682	0.272484	normal	2.65e-70	1.49843	up	1.9e-48	1.26166	up	8.96e-50	1.59196	up	3.86e-51	1.28345	up	Defense mechanisms	Molecular Function: ATP binding (GO:0005524);; Cellular Component: integral component of membrane (GO:0016021);; Molecular Function: ATPase activity (GO:0016887);; Molecular Function: ATPase activity, coupled to transmembrane movement of substances (GO:0042626);;	K05658|0.0e+00|vvi:100267452|K05658 ATP-binding cassette, subfamily B (MDR/TAP), member 1 [EC:7.6.2.2] | (RefSeq) ABC transporter B family member 11	Secondary metabolites biosynthesis, transport and catabolism	ABC transporter transmembrane region	ABC transporter B family member 11 OS=Arabidopsis thaliana OX=3702 GN=ABCB11 PE=2 SV=1	Secondary metabolites biosynthesis, transport and catabolism	ABC transporter B family member 21 like [Actinidia chinensis var. chinensis]
VaccDscaff1-augustus-gene-288.28	0.202424	0.273544	0.393097	0.355037	0.284791	0.292208	0.906995	1.062	0.791518	0.838009	1.02184	0.692631	0.315816	0.314967	0.199301	0.289617	0.380778	0.453832	--	--	--	0.000133506	1.64532	up	0.00122803	1.4671	up	--	--	--	--	--	--	--	Molecular Function: UDP-glycosyltransferase activity (GO:0008194);;	K13495|2.9e-157|jre:109018092|K13495 cis-zeatin O-glucosyltransferase [EC:2.4.1.215] | (RefSeq) zeatin O-glucosyltransferase-like	Carbohydrate transport and metabolism;; Energy production and conversion	UDP-glucoronosyl and UDP-glucosyl transferase	Zeatin O-glucosyltransferase OS=Phaseolus lunatus OX=3884 GN=ZOG1 PE=2 SV=1	--	Zeatin O-glucosyltransferase [Actinidia chinensis var. chinensis]
VaccDscaff1-augustus-gene-29.26	1.90234	1.43424	1.04203	1.98132	2.13876	1.58225	2.46939	2.25368	1.72155	2.20141	2.16334	1.4163	2.58338	4.4211	2.93246	2.0827	2.09127	2.66167	0.44509	0.397186	normal	0.125381	0.666073	normal	0.328236	0.479082	normal	0.00197913	1.24605	up	0.0814799	0.736621	normal	--	Biological Process: cytoplasmic translation (GO:0002181);; Molecular Function: molecular_function (GO:0003674);; Molecular Function: nucleic acid binding (GO:0003676);; Molecular Function: RNA binding (GO:0003723);; Molecular Function: mRNA binding (GO:0003729);; Molecular Function: structural constituent of ribosome (GO:0003735);; Molecular Function: structural molecule activity (GO:0005198);; M…	K02891|2.8e-53|rcu:8278743|K02891 large subunit ribosomal protein L22e | (RefSeq) 60S ribosomal protein L22-2	Translation, ribosomal structure and biogenesis	Ribosomal L22e protein family	60S ribosomal protein L22-2 OS=Arabidopsis thaliana OX=3702 GN=RPL22B PE=2 SV=1	Translation, ribosomal structure and biogenesis	hypothetical protein C3L33_12897, partial [Rhododendron williamsianum]
VaccDscaff1-augustus-gene-291.25	0.102151	0.062228	0.111852	0.188623	0.104803	0.195347	0.656689	0.585725	0.699231	1.66479	1.59983	1.74725	1.11683	1.03311	1.15909	1.40197	1.12291	1.76773	--	--	--	1.49e-15	2.75849	up	5.51e-51	4.07053	up	3.61e-30	3.54193	up	1.07e-34	3.89961	up	Coenzyme transport and metabolism	Biological Process: chlorophyll biosynthetic process (GO:0015995);; Molecular Function: magnesium chelatase activity (GO:0016851);;	K03403|0.0e+00|gra:105799490|K03403 magnesium chelatase subunit H [EC:6.6.1.1] | (RefSeq) magnesium-chelatase subunit ChlH, chloroplastic	--	CobN/Magnesium Chelatase	Magnesium-chelatase subunit ChlH, chloroplastic OS=Arabidopsis thaliana OX=3702 GN=CHLH PE=1 SV=1	Coenzyme transport and metabolism	Magnesium-chelatase subunit ChlH like [Actinidia chinensis var. chinensis]
VaccDscaff1-augustus-gene-291.29	3.78467	2.99265	2.75294	1.31716	1.41253	1.51499	1.08621	1.79872	1.0149	0.424959	0.584446	0.613786	0.296399	0.145468	0.174702	0.145032	0	0.142003	0.000710095	-0.92625	normal	0.00145414	-1.03831	down	1.27e-12	-2.25036	down	9.24e-19	-3.41229	down	1.94e-21	-4.2543	down	--	--	K03097|1.6e-14|aip:107632886|K03097 casein kinase II subunit alpha [EC:2.7.11.1] | (RefSeq) casein kinase II subunit alpha-like isoform X3	--	Protein of unknown function (DUF642)	--	Function unknown	hypothetical protein C3L33_12130, partial [Rhododendron williamsianum]
VaccDscaff1-augustus-gene-292.28	0.75169	0.628212	0.617446	0.232032	0.417053	0.469122	0.092365	0.186533	0.158362	0.428069	0.275358	0.330275	0.204595	0.104221	0.242871	0.328493	0.263187	0.243439	0.141011	-0.595621	normal	7.62e-07	-1.82026	down	0.0242191	-0.765765	normal	5.66e-05	-1.57582	down	0.00160756	-1.05126	down	Signal transduction mechanisms	Molecular Function: protein kinase activity (GO:0004672);; Molecular Function: protein binding (GO:0005515);; Cellular Component: cellular_component (GO:0005575);; Cellular Component: cell (GO:0005623);; Cellular Component: plasma membrane (GO:0005886);; Biological Process: protein phosphorylation (GO:0006468);; Cellular Component: membrane (GO:0016020);; Cellular Component: cell part (GO:0044464…	K13415|2.3e-48|sind:105179029|K13415 protein brassinosteroid insensitive 1 [EC:2.7.10.1 2.7.11.1] | (RefSeq) systemin receptor SR160-like	--	Leucine rich repeat	Leucine-rich repeat receptor-like tyrosine-protein kinase PXC3 OS=Arabidopsis thaliana OX=3702 GN=PXC3 PE=2 SV=1	Signal transduction mechanisms	hypothetical protein C3L33_12132, partial [Rhododendron williamsianum]
VaccDscaff1-augustus-gene-299.29	4.95517	5.20484	4.68811	4.19226	2.8317	4.08032	2.44877	2.67175	3.36608	1.72094	1.98961	3.03604	2.0188	1.65963	1.29312	1.23859	1.08085	1.57554	0.392036	-0.268302	normal	0.00825242	-0.606365	normal	0.00043612	-0.966052	normal	1.22e-07	-1.35564	down	1.7e-12	-1.71453	down	Lipid transport and metabolism	Molecular Function: molecular_function (GO:0003674);; Molecular Function: catalytic activity (GO:0003824);; Molecular Function: monooxygenase activity (GO:0004497);; Cellular Component: cellular_component (GO:0005575);; Cellular Component: intracellular (GO:0005622);; Cellular Component: cell (GO:0005623);; Cellular Component: cytoplasm (GO:0005737);; Cellular Component: endoplasmic reticulum (GO…	K10256|1.8e-170|qsu:112015494|K10256 omega-6 fatty acid desaturase / acyl-lipid omega-6 desaturase (Delta-12 desaturase) [EC:1.14.19.6 1.14.19.22] | (RefSeq) delta(12)-fatty-acid desaturase FAD2	--	Fatty acid desaturase	Delta(12)-fatty-acid desaturase FAD2 OS=Vernicia fordii OX=73154 GN=FAD2 PE=1 SV=1	Lipid transport and metabolism	hypothetical protein C3L33_12174, partial [Rhododendron williamsianum]
VaccDscaff1-augustus-gene-299.30	5.8957	6.90453	5.82022	5.55644	7.15533	5.20332	13.2728	13.5333	12.5238	6.21978	5.22492	5.47828	4.92134	5.7436	5.23305	3.89654	3.44323	4.0409	0.872227	0.0623623	normal	4.19e-22	1.25016	up	0.990399	-0.00352422	normal	0.798727	-0.0632463	normal	0.00345033	-0.548167	normal	Lipid transport and metabolism	Molecular Function: molecular_function (GO:0003674);; Molecular Function: catalytic activity (GO:0003824);; Molecular Function: monooxygenase activity (GO:0004497);; Cellular Component: cellular_component (GO:0005575);; Cellular Component: intracellular (GO:0005622);; Cellular Component: cell (GO:0005623);; Cellular Component: cytoplasm (GO:0005737);; Cellular Component: endoplasmic reticulum (GO…	K10256|1.4e-170|sind:105159686|K10256 omega-6 fatty acid desaturase / acyl-lipid omega-6 desaturase (Delta-12 desaturase) [EC:1.14.19.6 1.14.19.22] | (RefSeq) delta(12)-fatty-acid desaturase FAD2	--	Fatty acid desaturase	Delta(12)-fatty-acid desaturase FAD2 OS=Vernicia fordii OX=73154 GN=FAD2 PE=1 SV=1	Lipid transport and metabolism	hypothetical protein C3L33_12174, partial [Rhododendron williamsianum]
VaccDscaff1-augustus-gene-302.27	0.036912	0.208457	0.256388	0.536805	0.507826	1.75194	0.219895	0.592961	0.728567	0.186418	0.120382	0.271645	0.086399	0.350287	0.271088	0.212898	0	0.142707	0.00143825	1.42613	up	--	--	--	--	--	--	--	--	--	--	--	--	Lipid transport and metabolism	Molecular Function: molecular_function (GO:0003674);; Molecular Function: catalytic activity (GO:0003824);; Molecular Function: monooxygenase activity (GO:0004497);; Cellular Component: cellular_component (GO:0005575);; Cellular Component: intracellular (GO:0005622);; Cellular Component: cell (GO:0005623);; Cellular Component: cytoplasm (GO:0005737);; Cellular Component: endoplasmic reticulum (GO…	K10256|8.2e-192|ini:109150720|K10256 omega-6 fatty acid desaturase / acyl-lipid omega-6 desaturase (Delta-12 desaturase) [EC:1.14.19.6 1.14.19.22] | (RefSeq) delta(12)-fatty-acid desaturase FAD2-like	--	Fatty acid desaturase	Delta(12)-fatty-acid desaturase FAD2 OS=Vernicia fordii OX=73154 GN=FAD2 PE=1 SV=1	Lipid transport and metabolism	hypothetical protein C3L33_12174, partial [Rhododendron williamsianum]
VaccDscaff1-augustus-gene-302.30	0.986491	0.883433	1.749	0.555226	0.868224	1.0975	1.79055	0.836241	1.36044	1.82396	3.14783	1.80453	0.99827	0.990069	0.949205	0.225248	0.25578	0.198237	0.651996	-0.287062	normal	0.595766	0.292699	normal	0.026653	0.943143	normal	0.83421	-0.123294	normal	0.000106238	-1.99715	down	Lipid transport and metabolism	Molecular Function: molecular_function (GO:0003674);; Molecular Function: catalytic activity (GO:0003824);; Cellular Component: cellular_component (GO:0005575);; Cellular Component: intracellular (GO:0005622);; Cellular Component: cell (GO:0005623);; Cellular Component: cytoplasm (GO:0005737);; Cellular Component: endoplasmic reticulum (GO:0005783);; Cellular Component: endoplasmic reticulum memb…	K10256|2.7e-171|ini:109150720|K10256 omega-6 fatty acid desaturase / acyl-lipid omega-6 desaturase (Delta-12 desaturase) [EC:1.14.19.6 1.14.19.22] | (RefSeq) delta(12)-fatty-acid desaturase FAD2-like	--	Fatty acid desaturase	Delta(12)-fatty-acid desaturase FAD2 OS=Vernicia fordii OX=73154 GN=FAD2 PE=1 SV=1	Lipid transport and metabolism	hypothetical protein C3L33_12174, partial [Rhododendron williamsianum]
VaccDscaff1-augustus-gene-303.36	41.8522	48.4233	35.6587	20.6273	12.1437	23.6654	15.6468	7.63293	15.2302	16.546	9.97047	14.7956	12.3088	4.11937	5.74108	4.63434	5.02404	12.0931	0.00186113	-0.910172	normal	3.47e-05	-1.42371	down	2.83e-19	-1.45317	down	5.37e-06	-2.10459	down	1.38e-06	-2.17084	down	--	Biological Process: reproduction (GO:0000003);; Biological Process: defense response to nematode (GO:0002215);; Biological Process: developmental process involved in reproduction (GO:0003006);; Molecular Function: peroxidase activity (GO:0004601);; Cellular Component: cellular_component (GO:0005575);; Cellular Component: intracellular (GO:0005622);; Cellular Component: cell (GO:0005623);; Cellula…	K00430|9.0e-147|mesc:110620727|K00430 peroxidase [EC:1.11.1.7] | (RefSeq) peroxidase A2-like	--	Peroxidase	Peroxidase 15 OS=Ipomoea batatas OX=4120 GN=pod PE=1 SV=1	Secondary metabolites biosynthesis, transport and catabolism	hypothetical protein C3L33_22501, partial [Rhododendron williamsianum]
VaccDscaff1-augustus-gene-307.25	2.92758	2.67826	2.99816	1.91695	2.22759	1.25826	0.949697	1.36404	1.20406	1.24134	1.58025	0.805957	1.99878	1.69193	1.5203	0.81514	1.47963	1.03809	0.0589814	-0.507701	normal	5.9e-08	-1.0809	down	3.69e-05	-1.06521	down	0.00782968	-0.548531	normal	1.53e-06	-1.18509	down	Replication, recombination and repair	Molecular Function: chromatin binding (GO:0003682);; Cellular Component: nucleus (GO:0005634);; Molecular Function: methyltransferase activity (GO:0008168);; Biological Process: methylation (GO:0032259);;	K00558|2.6e-291|vvi:100252100|K00558 DNA (cytosine-5)-methyltransferase 1 [EC:2.1.1.37] | (RefSeq) putative DNA (cytosine-5)-methyltransferase CMT1	--	C-5 cytosine-specific DNA methylase	DNA (cytosine-5)-methyltransferase CMT3 OS=Oryza sativa subsp. japonica OX=39947 GN=CMT3 PE=2 SV=1	Chromatin structure and dynamics	DNA (cytosine-5)-methyltransferase 1-like [Camellia sinensis]
VaccDscaff1-augustus-gene-308.30	1.07043	0.825389	1.24632	2.35194	2.23996	1.91774	5.53235	5.77783	6.50984	3.45823	5.61885	5.28837	3.55003	5.67895	3.36586	3.06886	3.06384	4.44423	0.000731257	1.01887	up	2.29e-31	2.60557	up	1.74e-14	2.20156	up	2.65e-11	2.06576	up	3.77e-10	1.83365	up	Translation, ribosomal structure and biogenesis	Molecular Function: RNA binding (GO:0003723);;	K12900|2.3e-71|mesc:110622935|K12900 FUS-interacting serine-arginine-rich protein 1 | (RefSeq) serine/arginine-rich SC35-like splicing factor SCL33	General function prediction only	RNA recognition motif. (a.k.a. RRM, RBD, or RNP domain)	Serine/arginine-rich SC35-like splicing factor SCL30A OS=Arabidopsis thaliana OX=3702 GN=SCL30A PE=1 SV=1	RNA processing and modification	Serine/arginine-rich SC35-like splicing factor SCL30A [Actinidia chinensis var. chinensis]
VaccDscaff1-augustus-gene-309.26	10.0333	9.43724	9.66945	7.1309	7.5524	7.75209	4.855	4.55481	4.40118	3.81737	3.62269	4.82919	3.74063	4.34035	4.34873	3.68343	3.35231	4.82718	0.110695	-0.246768	normal	1.09e-11	-0.884312	normal	1.64e-12	-1.10347	down	2.43e-13	-1.05874	down	2.36e-11	-1.12567	down	--	Molecular Function: GTPase activity (GO:0003924);; Cellular Component: cellular_component (GO:0005575);; Cellular Component: intracellular (GO:0005622);; Cellular Component: cell (GO:0005623);; Cellular Component: cytoskeleton (GO:0005856);; Cellular Component: organelle (GO:0043226);; Cellular Component: non-membrane-bounded organelle (GO:0043228);; Cellular Component: intracellular organelle (G…	K07374|1.5e-253|aip:107632203|K07374 tubulin alpha | (RefSeq) tubulin alpha-3 chain	Cytoskeleton	Tubulin/FtsZ family, GTPase domain	Tubulin alpha-3 chain OS=Arabidopsis thaliana OX=3702 GN=TUBA3 PE=1 SV=2	Cytoskeleton	hypothetical protein C3L33_12117, partial [Rhododendron williamsianum]
VaccDscaff1-augustus-gene-311.33	0.812056	0.718286	0.788571	1.17238	1.15329	1.54967	0.441094	0.283857	0.518156	0.407415	0.267573	0.31443	0.338959	0.567144	0.597548	0.3109	0.313835	0.206804	0.00611618	0.775223	normal	0.0940372	-0.656726	normal	0.00571254	-1.00899	down	0.290185	-0.446606	normal	0.000901228	-1.24662	down	Amino acid transport and metabolism	Molecular Function: nucleotide binding (GO:0000166);; Biological Process: cellular amino acid metabolic process (GO:0006520);; Molecular Function: oxidoreductase activity, acting on the CH-NH2 group of donors, NAD or NADP as acceptor (GO:0016639);;	K00261|9.3e-226|pxb:103956212|K00261 glutamate dehydrogenase (NAD(P)+) [EC:1.4.1.3] | (RefSeq) glutamate dehydrogenase 1	Amino acid transport and metabolism	Glutamate/Leucine/Phenylalanine/Valine dehydrogenase	Glutamate dehydrogenase B OS=Nicotiana plumbaginifolia OX=4092 GN=GDHB PE=2 SV=1	Amino acid transport and metabolism	Glutamate dehydrogenase [Actinidia chinensis var. chinensis]
VaccDscaff1-augustus-gene-312.27	0.996445	0.91554	1.51639	1.03922	0.033513	0.117868	0.697573	0.632542	0.546996	0.638337	0.569296	0.455696	0.074599	0	0.611351	0	0.093549	0.097303	0.490372	-0.413203	normal	0.106588	-0.633448	normal	0.0335365	-0.83749	normal	0.27495	-0.989705	normal	3.03e-09	-3.30664	down	--	Biological Process: regulation of transcription, DNA-templated (GO:0006355);; Molecular Function: zinc ion binding (GO:0008270);; Molecular Function: sequence-specific DNA binding (GO:0043565);;	K21630|2.5e-28|cmax:111478040|K21630 GATA-type zinc finger protein 1 | (RefSeq) GATA transcription factor 6-like	Transcription	GATA zinc finger	GATA transcription factor 12 OS=Arabidopsis thaliana OX=3702 GN=GATA12 PE=2 SV=1	Transcription	hypothetical protein C3L33_12100, partial [Rhododendron williamsianum]
VaccDscaff1-augustus-gene-314.20	1.99788	2.15506	1.81123	2.29948	2.06166	2.34508	2.39014	3.27845	3.06162	2.59008	3.0082	1.98068	4.46572	3.68478	3.23738	3.47275	3.85146	3.43221	0.362364	0.274657	normal	0.00161966	0.712533	normal	0.0916233	0.463551	normal	1.21e-06	1.07183	up	2.37e-07	0.985505	normal	Signal transduction mechanisms	Molecular Function: magnesium ion binding (GO:0000287);; Molecular Function: molecular_function (GO:0003674);; Molecular Function: catalytic activity (GO:0003824);; Molecular Function: pyruvate kinase activity (GO:0004743);; Cellular Component: cellular_component (GO:0005575);; Cellular Component: intracellular (GO:0005622);; Cellular Component: cell (GO:0005623);; Cellular Component: cytoplasm (…	K00873|1.5e-236|cmo:103491640|K00873 pyruvate kinase [EC:2.7.1.40] | (RefSeq) pyruvate kinase, cytosolic isozyme	Carbohydrate transport and metabolism	Pyruvate kinase, barrel domain	Pyruvate kinase, cytosolic isozyme OS=Nicotiana tabacum OX=4097 PE=2 SV=1	Carbohydrate transport and metabolism	hypothetical protein C3L33_12094, partial [Rhododendron williamsianum]
VaccDscaff1-augustus-gene-314.23	2.45243	3.95392	2.903	1.89574	1.45508	1.91996	0.295858	0.209338	0.45694	0.764572	0.80962	1.04967	0.057763	0.145252	0.125552	0.555862	0.194926	0.177755	0.0615546	-0.604776	normal	8.16e-15	-2.81144	down	5.37e-07	-1.5851	down	1.27e-20	-4.10517	down	1.12e-11	-2.85684	down	--	Cellular Component: extracellular region (GO:0005576);; Cellular Component: cell wall (GO:0005618);; Biological Process: plant-type cell wall organization (GO:0009664);; Cellular Component: membrane (GO:0016020);;	K20628|5.7e-115|rcu:8263413|K20628 expansin | (RefSeq) expansin-A15	--	Expansin C-terminal domain	Expansin-A15 OS=Arabidopsis thaliana OX=3702 GN=EXPA15 PE=2 SV=2	Function unknown	Expansin-A15 like [Actinidia chinensis var. chinensis]
VaccDscaff1-augustus-gene-314.24	1.10766	1.20658	0.839434	0.961686	1.36326	0.904333	3.64661	4.0627	2.74498	4.34577	2.89225	3.33309	2.75067	3.55954	3.79904	4.05613	4.08801	3.98023	0.833806	0.128904	normal	1.38e-12	1.83449	up	1.9e-12	1.79263	up	7.94e-12	1.77778	up	1.79e-20	2.04396	up	--	Molecular Function: molecular_function (GO:0003674);; Molecular Function: catalytic activity (GO:0003824);; Cellular Component: cellular_component (GO:0005575);; Cellular Component: intracellular (GO:0005622);; Cellular Component: cell (GO:0005623);; Cellular Component: cytoplasm (GO:0005737);; Biological Process: biological_process (GO:0008150);; Biological Process: metabolic process (GO:0008152…	K03671|1.1e-08|ppp:112286750|K03671 thioredoxin 1 | (RefSeq) thioredoxin F-type, chloroplastic-like	Posttranslational modification, protein turnover, chaperones	Thioredoxin	Thioredoxin-like 1-1, chloroplastic OS=Arabidopsis thaliana OX=3702 GN=At1g08570 PE=2 SV=1	Posttranslational modification, protein turnover, chaperones	hypothetical protein C3L33_12093, partial [Rhododendron williamsianum]
VaccDscaff1-augustus-gene-316.27	31.71	32.3346	32.1862	32.8582	31.4963	34.2926	80.0903	75.1445	73.7949	80.3843	78.2096	77.3107	77.9568	75.5678	78.1561	58.49	58.4446	62.8754	0.0853873	0.159483	normal	2.7e-101	1.43201	up	6.69e-116	1.4227	up	3.27e-99	1.42568	up	1.55e-56	1.0537	up	--	Molecular Function: UDP-glycosyltransferase activity (GO:0008194);;	K22950|4.1e-111|fve:101295404|K22950 acylphloroglucinol glucosyltransferase [EC:2.4.1.358] | (RefSeq) anthocyanidin 3-O-glucosyltransferase 2-like	Carbohydrate transport and metabolism;; Energy production and conversion	UDP-glucoronosyl and UDP-glucosyl transferase	Putative UDP-glucose flavonoid 3-O-glucosyltransferase 3 OS=Fragaria ananassa OX=3747 GN=GT3 PE=2 SV=1	--	hypothetical protein HYC85_012329 [Camellia sinensis]
VaccDscaff1-augustus-gene-318.34	0.36131	0.411554	0.284435	0.442406	0.330849	0.496574	0.809027	0.90955	1.06279	0.559521	0.313118	0.428361	0.696771	0.7203	0.506992	0.432603	0.516948	0.229277	--	--	--	0.000634203	1.40965	up	--	--	--	--	--	--	--	--	--	--	Molecular Function: UDP-glycosyltransferase activity (GO:0008194);;	K22950|2.5e-100|fve:101295404|K22950 acylphloroglucinol glucosyltransferase [EC:2.4.1.358] | (RefSeq) anthocyanidin 3-O-glucosyltransferase 2-like	Carbohydrate transport and metabolism;; Energy production and conversion	UDP-glucoronosyl and UDP-glucosyl transferase	UDP-glycosyltransferase 71E1 OS=Stevia rebaudiana OX=55670 GN=UGT71E1 PE=2 SV=1	--	hypothetical protein HYC85_012255 [Camellia sinensis]
VaccDscaff1-augustus-gene-318.37	1.60863	1.99286	1.71981	1.33875	1.69592	1.73277	10.5829	10.2573	10.4151	6.67152	6.77091	6.13414	4.72392	7.26326	5.56838	3.31251	2.55521	3.86659	0.959316	-0.0298626	normal	2.74e-71	2.70185	up	3.06e-28	1.97167	up	2.46e-15	1.83834	up	7.83e-05	1.00215	up	--	Molecular Function: UDP-glycosyltransferase activity (GO:0008194);;	K22950|1.8e-109|fve:101295404|K22950 acylphloroglucinol glucosyltransferase [EC:2.4.1.358] | (RefSeq) anthocyanidin 3-O-glucosyltransferase 2-like	Carbohydrate transport and metabolism;; Energy production and conversion	UDP-glucoronosyl and UDP-glucosyl transferase	UDP-glycosyltransferase 71E1 OS=Stevia rebaudiana OX=55670 GN=UGT71E1 PE=2 SV=1	--	hypothetical protein HYC85_012329 [Camellia sinensis]
VaccDscaff1-augustus-gene-318.39	1.39894	1.07057	1.61486	2.0784	1.92729	2.51403	5.85344	5.23068	5.82959	4.95687	5.00755	4.1351	4.38457	5.30997	4.50246	3.31408	2.97475	3.32634	0.0125598	0.717088	normal	4.4e-28	2.17903	up	1.21e-17	1.85787	up	2.47e-17	1.90787	up	7.39e-09	1.3534	up	--	Molecular Function: UDP-glycosyltransferase activity (GO:0008194);;	K22950|1.6e-115|fve:101295404|K22950 acylphloroglucinol glucosyltransferase [EC:2.4.1.358] | (RefSeq) anthocyanidin 3-O-glucosyltransferase 2-like	Carbohydrate transport and metabolism;; Energy production and conversion	UDP-glucoronosyl and UDP-glucosyl transferase	UDP-glycosyltransferase 71E1 OS=Stevia rebaudiana OX=55670 GN=UGT71E1 PE=2 SV=1	--	hypothetical protein HYC85_012329 [Camellia sinensis]
VaccDscaff1-augustus-gene-319.26	1.36646	1.26496	1.0812	1.19716	1.15756	0.891951	0.695134	0.659153	0.751616	0.52977	0.545941	0.47234	0.166106	0.171853	0.623294	0.258144	0.393541	0.445307	0.905082	-0.0625063	normal	0.0335977	-0.607223	normal	0.000238033	-1.06357	down	0.000575495	-1.61656	down	3.55e-06	-1.52191	down	--	Cellular Component: Golgi membrane (GO:0000139);; Cellular Component: integral component of membrane (GO:0016021);; Biological Process: pectin biosynthetic process (GO:0045489);; Molecular Function: polygalacturonate 4-alpha-galacturonosyltransferase activity (GO:0047262);; Biological Process: cell wall organization (GO:0071555);;	K20867|6.9e-224|qsu:112029506|K20867 galacturonosyltransferase 12/13/14/15 [EC:2.4.1.-] | (RefSeq) probable galacturonosyltransferase 15 isoform X1	--	Glycosyl transferase family 8	Probable galacturonosyltransferase 15 OS=Arabidopsis thaliana OX=3702 GN=GAUT15 PE=2 SV=1	Carbohydrate transport and metabolism	hypothetical protein C3L33_12073, partial [Rhododendron williamsianum]
VaccDscaff1-augustus-gene-32.25	0.825711	0.44086	0.845691	0.580832	0.666661	0.490414	0.752157	1.13772	0.608522	0.936227	1.25557	0.815002	1.58886	1.35734	1.57103	1.26488	1.09431	1.04547	0.813061	-0.137263	normal	0.335649	0.395635	normal	0.0928741	0.604918	normal	2.1e-05	1.20999	up	0.00925106	0.807612	normal	General function prediction only	Molecular Function: GTP binding (GO:0005525);;	K00031|3.9e-07|ghi:107885926|K00031 isocitrate dehydrogenase [EC:1.1.1.42] | (RefSeq) cytosolic isocitrate dehydrogenase [NADP]-like	--	Translocase of chloroplast 159/132, membrane anchor domain	Translocase of chloroplast 159, chloroplastic OS=Arabidopsis thaliana OX=3702 GN=TOC159 PE=1 SV=1	Function unknown	hypothetical protein C3L33_12888, partial [Rhododendron williamsianum]
VaccDscaff1-augustus-gene-332.28	2.13975	2.15395	1.39349	1.21642	1.02746	1.09756	0.856231	0.59836	1.01527	1.41338	1.85081	1.25209	0.409167	0.754165	0.498005	0.480511	0.476109	1.03223	0.107949	-0.554943	normal	0.00663186	-0.951286	normal	0.654747	-0.185667	normal	5.94e-05	-1.50834	down	0.00212377	-1.25879	down	--	--	--	--	--	--	Function unknown	hypothetical protein C3L33_12037, partial [Rhododendron williamsianum]
VaccDscaff1-augustus-gene-332.29	1.20742	1.32124	1.52572	0.950244	0.714074	1.10386	0.139425	0.286539	0.190686	0.283134	0.113095	0.591818	0.238698	0.110924	0.097172	0.075062	0.071265	0.124481	0.483303	-0.340668	normal	4.59e-07	-2.19507	down	0.00168396	-1.59979	down	1.02e-07	-2.5786	down	6.41e-11	-3.17448	down	--	Molecular Function: molecular_function (GO:0003674);; Molecular Function: catalytic activity (GO:0003824);; Cellular Component: cellular_component (GO:0005575);; Cellular Component: intracellular (GO:0005622);; Cellular Component: cell (GO:0005623);; Cellular Component: cytoplasm (GO:0005737);; Cellular Component: vacuole (GO:0005773);; Cellular Component: Golgi apparatus (GO:0005794);; Cellular …	K23877|1.4e-24|adu:107488880|K23877 xyloglucan O-acetyltransferase | (RefSeq) LOW QUALITY PROTEIN: protein ALTERED XYLOGLUCAN 4-like	--	GDSL/SGNH-like Acyl-Esterase family found in Pmr5 and Cas1p	Protein trichome birefringence-like 39 OS=Arabidopsis thaliana OX=3702 GN=TBL39 PE=2 SV=1	Function unknown	hypothetical protein HYC85_012346 [Camellia sinensis]
VaccDscaff1-augustus-gene-334.27	5.08867	4.72356	5.98188	5.38474	4.41476	5.09419	4.38306	3.86117	3.82125	2.46526	2.46679	2.13066	2.49208	2.41744	2.38765	2.42828	2.0368	1.92051	0.925161	0.0390895	normal	0.42067	-0.200136	normal	8.42e-06	-0.990974	normal	4.86e-05	-0.923038	normal	8.42e-07	-1.12488	down	General function prediction only	Molecular Function: GTPase activity (GO:0003924);; Molecular Function: GTP binding (GO:0005525);; Cellular Component: cellular_component (GO:0005575);; Cellular Component: intracellular (GO:0005622);; Cellular Component: cell (GO:0005623);; Cellular Component: cytoplasm (GO:0005737);; Cellular Component: endosome (GO:0005768);; Cellular Component: endomembrane system (GO:0012505);; Cellular Compo…	K07904|1.3e-114|crb:17876452|K07904 Ras-related protein Rab-11A | (RefSeq) ras-related protein RABA1f	Intracellular trafficking, secretion, and vesicular transport	Ras family	Ras-related protein RABA1f OS=Arabidopsis thaliana OX=3702 GN=RABA1F PE=2 SV=1	Intracellular trafficking, secretion, and vesicular transport	hypothetical protein C3L33_12025, partial [Rhododendron williamsianum]
VaccDscaff1-augustus-gene-339.18	0.805801	0.858144	0.781383	0.738671	0.711291	0.822545	1.20144	1.45799	1.37816	1.78923	1.29523	1.68456	0.880232	1.11131	1.17189	0.684088	0.901661	1.03198	0.972462	0.0257655	normal	0.00672584	0.864437	normal	0.00084774	1.03507	up	0.200244	0.503203	normal	0.601251	0.239107	normal	Amino acid transport and metabolism	Biological Process: cellular amino acid metabolic process (GO:0006520);; Molecular Function: transaminase activity (GO:0008483);; Biological Process: biosynthetic process (GO:0009058);; Molecular Function: pyridoxal phosphate binding (GO:0030170);;	K00815|5.1e-179|cic:CICLE_v10015356mg|K00815 tyrosine aminotransferase [EC:2.6.1.5] | (RefSeq) hypothetical protein	Amino acid transport and metabolism	Aminotransferase class I and II	Nicotianamine aminotransferase 1 OS=Oryza sativa subsp. japonica OX=39947 GN=NAAT1 PE=1 SV=1	Amino acid transport and metabolism	Aminotransferase [Actinidia chinensis var. chinensis]
VaccDscaff1-augustus-gene-342.28	9.10366	9.59812	8.96124	8.99895	8.98948	8.61252	3.97894	4.05916	3.28207	3.3077	3.14765	3.21902	3.59702	3.63427	3.72284	4.0774	4.93212	4.20968	0.740065	0.0673725	normal	1e-14	-1.09014	down	3.3e-26	-1.36484	down	4.27e-18	-1.16356	down	5.12e-11	-0.905959	normal	Carbohydrate transport and metabolism	Molecular Function: hydrolase activity, hydrolyzing O-glycosyl compounds (GO:0004553);; Biological Process: carbohydrate metabolic process (GO:0005975);; Cellular Component: integral component of membrane (GO:0016021);;	K19355|3.5e-206|oeu:111389730|K19355 mannan endo-1,4-beta-mannosidase [EC:3.2.1.78] | (RefSeq) mannan endo-1,4-beta-mannosidase 2-like isoform X1	--	Cellulase (glycosyl hydrolase family 5)	Mannan endo-1,4-beta-mannosidase 2 OS=Arabidopsis thaliana OX=3702 GN=MAN2 PE=2 SV=1	Carbohydrate transport and metabolism	Mannan endo-1,4-beta-mannosidase [Actinidia chinensis var. chinensis]
VaccDscaff1-augustus-gene-342.30	0.142779	0.045682	0.254142	0.874137	0.434032	0.857112	1.57755	0.72223	1.18932	1.73545	1.77064	1.21558	2.22401	2.7195	1.59801	2.26116	1.29455	2.1515	--	--	--	--	--	--	1.91e-07	2.74294	up	2.32e-10	3.36723	up	5.99e-09	3.20846	up	--	--	--	--	--	--	--	Fork head domain transcription factor slp2 like [Actinidia chinensis var. chinensis]
VaccDscaff1-augustus-gene-342.32	6.45808	8.69292	8.94008	7.62642	8.69282	8.98428	15.0985	13.3189	13.7155	14.0802	13.7209	8.29917	6.79175	13.6901	14.2394	14.8919	15.0809	15.1631	0.422702	0.189094	normal	5.15e-12	0.981024	normal	0.00127798	0.698018	normal	0.0109438	0.666796	normal	1.58e-14	1.05147	up	--	--	K13192|9.3e-20|dzi:111300937|K13192 RNA-binding protein 26 | (RefSeq) zinc finger CCCH domain-containing protein 41-like	--	UBA-like domain (DUF1421)	--	Function unknown	hypothetical protein C3L33_11995, partial [Rhododendron williamsianum]
VaccDscaff1-augustus-gene-343.30	0.746686	0.640672	0.512944	0.669391	0.427259	0.28852	1.06047	0.785298	0.966404	1.20994	1.13626	0.922603	1.27716	1.10885	1.10831	1.29171	1.37817	1.27086	0.688489	-0.247354	normal	0.036153	0.70161	normal	0.00621742	0.859291	normal	0.00124982	0.991069	normal	3.42e-05	1.15507	up	--	--	--	General function prediction only	PPR repeat	Pentatricopeptide repeat-containing protein At2g20710, mitochondrial OS=Arabidopsis thaliana OX=3702 GN=At2g20710 PE=2 SV=1	Function unknown	hypothetical protein C3L33_11993, partial [Rhododendron williamsianum]
VaccDscaff1-augustus-gene-345.26	1.14976	1.098	1.08597	0.859037	0.670375	1.20788	0.423365	0.355992	0.577497	0.275674	0.376145	0.683621	0.25682	0.132711	0.20545	0.129221	0.142944	0.179893	0.799247	-0.135452	normal	0.00140072	-1.03956	down	0.00572504	-1.08766	down	5.59e-09	-2.15115	down	1.31e-12	-2.53732	down	--	Molecular Function: protein serine/threonine phosphatase activity (GO:0004722);;	K17506|4.9e-21|mng:MNEG_3991|K17506 protein phosphatase 1L [EC:3.1.3.16] | (RefSeq) hypothetical protein	Signal transduction mechanisms	Protein phosphatase 2C	Probable protein phosphatase 2C 52 OS=Arabidopsis thaliana OX=3702 GN=At4g03415 PE=1 SV=1	Signal transduction mechanisms	Protein like [Actinidia chinensis var. chinensis]
VaccDscaff1-augustus-gene-348.34	2.19279	2.1766	2.65596	10.7418	15.9635	12.5015	9.88659	12.3185	8.89351	4.10016	4.78973	4.56215	3.69752	2.66886	3.70111	1.98129	3.05465	2.19243	5.36e-38	2.44075	up	4.86e-33	2.27983	up	3.06e-06	1.04135	up	0.0150024	0.660854	normal	0.605872	0.187062	normal	Coenzyme transport and metabolism	Molecular Function: alternative oxidase activity (GO:0009916);; Biological Process: oxidation-reduction process (GO:0055114);;	K17893|2.1e-143|cann:107853552|K17893 ubiquinol oxidase [EC:1.10.3.11] | (RefSeq) ubiquinol oxidase 2, mitochondrial-like	--	Alternative oxidase	Ubiquinol oxidase 1, mitochondrial OS=Nicotiana tabacum OX=4097 GN=AOX1 PE=1 SV=1	Energy production and conversion	hypothetical protein C3L33_08881, partial [Rhododendron williamsianum]
VaccDscaff1-augustus-gene-353.30	3.38341	5.0995	3.22186	2.61139	4.90981	3.15412	4.34987	3.71359	3.44994	1.80413	2.18404	2.78411	2.38144	1.7812	1.26144	0.628855	1.0135	1.72134	0.993342	-0.0055896	normal	0.577903	0.159821	normal	0.0266422	-0.629743	normal	0.00360787	-0.897327	normal	1.25e-05	-1.54844	down	--	Molecular Function: nucleoside transmembrane transporter activity (GO:0005337);; Cellular Component: integral component of membrane (GO:0016021);;	K15014|2.2e-200|egr:104424835|K15014 solute carrier family 29 (equilibrative nucleoside transporter), member 1/2/3 | (RefSeq) equilibrative nucleotide transporter 3	Nucleotide transport and metabolism	Nucleoside transporter	Equilibrative nucleotide transporter 3 OS=Arabidopsis thaliana OX=3702 GN=ENT3 PE=1 SV=1	Nucleotide transport and metabolism	Equilibrative nucleotide transporter like [Actinidia chinensis var. chinensis]
VaccDscaff1-augustus-gene-359.30	2.33186	1.99916	2.01771	1.15785	1.28383	1.2504	1.23819	0.473203	0.510245	0.749885	1.12051	1.13434	0.114978	0.338781	0.154263	0.372132	0.226558	0.414905	0.112207	-0.567765	normal	0.00766026	-1.1744	down	0.0171689	-0.871787	normal	1.15e-09	-2.81427	down	7.38e-09	-2.27571	down	--	--	--	--	Protein of unknown function (DUF1218)	--	Function unknown	hypothetical protein C3L33_11931, partial [Rhododendron williamsianum]
VaccDscaff1-augustus-gene-36.30	2.75451	2.61918	2.60244	3.41387	2.70696	3.00142	3.47238	5.29143	5.24032	5.99131	7.31655	4.93898	8.61349	6.91428	6.70107	7.5781	7.21291	8.50231	0.399698	0.296861	normal	0.000208848	0.961155	normal	5.67e-08	1.2879	up	4.94e-14	1.60847	up	6.5e-19	1.6748	up	--	Cellular Component: mitochondrion (GO:0005739);;	--	--	--	--	--	Integrator complex subunit like [Actinidia chinensis var. chinensis]
VaccDscaff1-augustus-gene-366.27	4.74058	4.59615	4.95568	3.05976	2.78998	2.81859	1.70803	2.05448	1.93752	2.30374	2.07884	2.02703	2.01664	1.45113	1.45835	1.80934	1.92356	2.08051	6.29e-07	-0.583689	normal	1.29e-19	-1.13009	down	1.07e-17	-1.01427	down	5.02e-16	-1.35178	down	2.3e-20	-1.1352	down	Transcription	Molecular Function: ADP binding (GO:0043531);;	K13459|1.2e-131|vvi:104880791|K13459 disease resistance protein RPS2 | (RefSeq) probable disease resistance protein At4g27220	Signal transduction mechanisms	NB-ARC domain	Probable disease resistance protein At4g27220 OS=Arabidopsis thaliana OX=3702 GN=At4g27220 PE=2 SV=1	Signal transduction mechanisms	hypothetical protein HYC85_012180 [Camellia sinensis]
VaccDscaff1-augustus-gene-367.18	0.383633	0.660638	0.34789	0	0.170308	0.153214	0.373027	0.647446	0.067342	1.26797	2.03302	1.79242	0.301651	0.219965	0.231021	0.758468	1.09946	0.702144	--	--	--	--	--	--	7.83e-06	1.78598	up	--	--	--	0.0655685	0.930509	normal	Secondary metabolites biosynthesis, transport and catabolism;; General function prediction only	Molecular Function: oxidoreductase activity (GO:0016491);;	K19825|1.1e-65|cann:107868137|K19825 2-alkenal reductase (NADP+) [EC:1.3.1.102] | (RefSeq) 2-alkenal reductase (NADP(+)-dependent)	General function prediction only	Zinc-binding dehydrogenase	2-alkenal reductase (NADP(+)-dependent) OS=Nicotiana tabacum OX=4097 GN=DBR PE=1 SV=1	Function unknown	2-alkenal reductase [Actinidia chinensis var. chinensis]
VaccDscaff1-augustus-gene-368.30	4.7848	4.70572	4.92187	2.44033	2.85143	2.93556	1.17745	1.04765	1.1304	2.25575	1.9105	1.96221	1.78046	1.03191	1.26972	1.76859	1.73436	1.54537	0.002328	-0.647686	normal	1.28e-17	-1.85594	down	1.38e-07	-1.0697	down	1.01e-09	-1.59922	down	1.57e-10	-1.32855	down	Energy production and conversion	Molecular Function: dihydrolipoyllysine-residue succinyltransferase activity (GO:0004149);; Biological Process: tricarboxylic acid cycle (GO:0006099);; Cellular Component: oxoglutarate dehydrogenase complex (GO:0045252);;	K00658|1.2e-170|nnu:104596619|K00658 2-oxoglutarate dehydrogenase E2 component (dihydrolipoamide succinyltransferase) [EC:2.3.1.61] | (RefSeq) dihydrolipoyllysine-residue succinyltransferase component of 2-oxoglutarate dehydrogenase complex 2, mitochondrial-like	Energy production and conversion	2-oxoacid dehydrogenases acyltransferase (catalytic domain)	Dihydrolipoyllysine-residue succinyltransferase component of 2-oxoglutarate dehydrogenase complex 2, mitochondrial OS=Arabidopsis thaliana OX=3702 GN=At4g26910 PE=1 SV=2	Energy production and conversion	PREDICTED: dihydrolipoyllysine-residue succinyltransferase component of 2-oxoglutarate dehydrogenase complex 2, mitochondrial-like [Nelumbo nucifera]
VaccDscaff1-augustus-gene-370.22	0.667795	0.533756	0.693604	0.478701	0.366064	0.326727	0.262456	0.307889	0.216265	0.327399	0.47736	0.460307	0.338332	0.416659	0.371387	0.482205	0.575892	0.477389	0.145887	-0.495808	normal	0.000668138	-1.02292	down	0.213555	-0.424675	normal	0.0673381	-0.565119	normal	0.66888	-0.144394	normal	Replication, recombination and repair	Molecular Function: molecular_function (GO:0003674);; Molecular Function: catalytic activity (GO:0003824);; Molecular Function: DNA-(apurinic or apyrimidinic site) lyase activity (GO:0003906);; Cellular Component: cellular_component (GO:0005575);; Cellular Component: intracellular (GO:0005622);; Cellular Component: cell (GO:0005623);; Cellular Component: nucleus (GO:0005634);; Biological Process:…	K10773|1.0e-12|aof:109835777|K10773 endonuclease III [EC:4.2.99.18] | (RefSeq) putative DNA glycosylase At3g47830 isoform X1	--	RRM in Demeter	DNA glycosylase/AP lyase ROS1 OS=Arabidopsis thaliana OX=3702 GN=ROS1 PE=1 SV=2	Replication, recombination and repair	hypothetical protein C3L33_06772, partial [Rhododendron williamsianum]
VaccDscaff1-augustus-gene-372.30	2.04281	1.49581	2.04468	1.09572	0.89155	1.14204	0.873603	1.04371	0.779553	0.617672	0.530659	0.528545	0.146676	0.411006	0.228339	0.093899	0.071192	0.100027	0.0699184	-0.60957	normal	0.0117286	-0.814663	normal	3.89e-06	-1.48627	down	5.53e-09	-2.44236	down	1.68e-18	-3.80088	down	--	Molecular Function: hydrolase activity, hydrolyzing O-glycosyl compounds (GO:0004553);; Biological Process: carbohydrate metabolic process (GO:0005975);;	K19891|7.3e-100|smo:SELMODRAFT_442025|K19891 glucan endo-1,3-beta-glucosidase 1/2/3 [EC:3.2.1.39] | (RefSeq) hypothetical protein	--	Glycosyl hydrolases family 17	Glucan endo-1,3-beta-glucosidase 12 OS=Arabidopsis thaliana OX=3702 GN=At4g29360 PE=2 SV=1	Carbohydrate transport and metabolism	hypothetical protein C3L33_11888, partial [Rhododendron williamsianum]
VaccDscaff1-augustus-gene-373.37	2.55345	1.7424	2.17879	2.02074	2.20365	2.02394	3.02858	3.25118	2.79438	8.45958	10.3971	9.8486	6.81534	5.23472	8.10592	11.9049	12.5229	11.815	0.888006	0.0699856	normal	0.00665144	0.654695	normal	6.78e-33	2.23077	up	2.01e-15	1.75514	up	3.53e-59	2.60794	up	Secondary metabolites biosynthesis, transport and catabolism;; Defense mechanisms	Molecular Function: monooxygenase activity (GO:0004497);; Molecular Function: iron ion binding (GO:0005506);; Cellular Component: integral component of membrane (GO:0016021);; Molecular Function: oxidoreductase activity, acting on paired donors, with incorporation or reduction of molecular oxygen (GO:0016705);; Molecular Function: heme binding (GO:0020037);;	K09754|6.7e-258|jre:109019007|K09754 5-O-(4-coumaroyl)-D-quinate 3'-monooxygenase [EC:1.14.14.96] | (RefSeq) cytochrome P450 98A2	Secondary metabolites biosynthesis, transport and catabolism	Cytochrome P450	Cytochrome P450 98A2 OS=Glycine max OX=3847 GN=CYP98A2 PE=2 SV=1	Secondary metabolites biosynthesis, transport and catabolism	cytochrome P450 98A2 [Juglans regia]
VaccDscaff1-augustus-gene-375.20	1.47542	1.28938	1.39317	1.44153	1.18462	2.42254	2.4538	1.70666	3.2488	2.37649	2.75212	2.14582	1.91405	2.37211	2.26768	2.24717	4.00417	2.83322	0.459197	0.344169	normal	0.00195783	0.966015	normal	0.000604903	0.90413	normal	0.0041831	0.790659	normal	2.41e-05	1.235	up	--	Molecular Function: protein tyrosine phosphatase activity (GO:0004725);; Molecular Function: protein tyrosine/serine/threonine phosphatase activity (GO:0008138);;	K04459|8.2e-114|qsu:111986801|K04459 dual specificity MAP kinase phosphatase [EC:3.1.3.16 3.1.3.48] | (RefSeq) protein-tyrosine-phosphatase IBR5	Defense mechanisms	Dual specificity phosphatase, catalytic domain	Protein-tyrosine-phosphatase IBR5 OS=Arabidopsis thaliana OX=3702 GN=IBR5 PE=1 SV=1	Defense mechanisms	Protein-tyrosine-phosphatase [Actinidia chinensis var. chinensis]
VaccDscaff1-augustus-gene-377.26	1.90817	1.85095	2.02455	2.12453	1.56149	1.91393	1.18721	1.02649	1.08073	0.587587	0.999849	0.808046	0.53999	0.726877	0.388797	0.479943	0.413393	0.540641	0.840487	0.07691	normal	0.00352609	-0.610889	normal	4.14e-05	-1.08765	down	1.94e-08	-1.5759	down	9.42e-15	-1.79871	down	--	Biological Process: reproduction (GO:0000003);; Biological Process: cell morphogenesis (GO:0000902);; Biological Process: cell morphogenesis involved in differentiation (GO:0000904);; Biological Process: developmental process involved in reproduction (GO:0003006);; Molecular Function: molecular_function (GO:0003674);; Molecular Function: actin binding (GO:0003779);; Molecular Function: binding (G…	K17275|1.3e-297|nsy:104233904|K17275 plastin-1 | (RefSeq) fimbrin-like protein 2	Cytoskeleton	Calponin homology (CH) domain	Fimbrin-5 OS=Arabidopsis thaliana OX=3702 GN=FIM5 PE=1 SV=1	Cytoskeleton	hypothetical protein C3L33_11867, partial [Rhododendron williamsianum]
VaccDscaff1-augustus-gene-388.23	0.648406	0.728454	0.348034	0.583301	0.947409	0.930196	3.61247	3.70135	3.36485	4.9675	5.20694	5.0231	1.61898	2.97201	2.95189	1.51618	2.55779	1.80821	0.40245	0.464013	normal	3.41e-20	2.66383	up	8.64e-32	3.10405	up	3.27e-08	2.12562	up	4.89e-06	1.79499	up	--	Cellular Component: photosystem I (GO:0009522);; Cellular Component: photosystem II (GO:0009523);; Cellular Component: chloroplast thylakoid membrane (GO:0009535);; Biological Process: photosynthesis, light harvesting (GO:0009765);; Cellular Component: integral component of membrane (GO:0016021);; Molecular Function: chlorophyll binding (GO:0016168);; Biological Process: protein-chromophore linka…	K08913|5.0e-140|oeu:111412055|K08913 light-harvesting complex II chlorophyll a/b binding protein 2 | (RefSeq) chlorophyll a-b binding protein 37, chloroplastic	--	Chlorophyll A-B binding protein	Chlorophyll a-b binding protein 4, chloroplastic OS=Solanum lycopersicum OX=4081 GN=CAB4 PE=2 SV=1	Energy production and conversion	chlorophyll a-b binding protein 37, chloroplastic [Camellia sinensis]
VaccDscaff1-augustus-gene-394.18	0.16058	0.061394	0.159587	0.138504	0.24489	0.160498	0.365722	0.350294	0.382945	0.168235	0.178624	0.33231	0.234528	0.211814	0.389768	0.259989	0.13823	0.198062	--	--	--	0.00201892	1.47161	up	--	--	--	--	--	--	--	--	--		Molecular Function: protein kinase activity (GO:0004672);; Molecular Function: ATP binding (GO:0005524);; Cellular Component: integral component of membrane (GO:0016021);;	K13416|2.0e-70|oeu:111411740|K13416 brassinosteroid insensitive 1-associated receptor kinase 1 [EC:2.7.10.1 2.7.11.1] | (RefSeq) BRASSINOSTEROID INSENSITIVE 1-associated receptor kinase 1-like	--	Protein tyrosine and serine/threonine kinase	Probable LRR receptor-like serine/threonine-protein kinase At1g53440 OS=Arabidopsis thaliana OX=3702 GN=At1g53440 PE=2 SV=2	Signal transduction mechanisms	hypothetical protein F0562_010543 [Nyssa sinensis]
VaccDscaff1-augustus-gene-396.23	4.04838	3.80266	4.63999	3.55724	3.09779	4.0875	3.17972	0.724129	1.87789	2.61814	0.994054	1.84635	3.55579	2.10473	1.92533	4.09035	1.3629	3.11149	0.810886	-0.0859846	normal	0.0429058	-0.848013	normal	0.00103092	-1.01364	down	0.0718358	-0.533021	normal	0.335024	-0.37494	normal	--	--	--	--	--	Protein FLX-like 1 OS=Arabidopsis thaliana OX=3702 GN=FLXL1 PE=1 SV=1	Function unknown	hypothetical protein C3L33_11835, partial [Rhododendron williamsianum]
VaccDscaff1-augustus-gene-396.27	1.42421	0.8754	0.960084	2.08495	2.39242	2.95341	1.33362	0.90554	1.15967	0.511988	1.03722	0.4118	0.999501	0.523959	0.372305	0.541494	0.593469	0.928359	7.18e-06	1.17189	up	0.563716	0.229231	normal	0.279561	-0.52785	normal	0.248279	-0.561491	normal	0.263257	-0.465238	normal	Cell wall/membrane/envelope biogenesis	Molecular Function: molecular_function (GO:0003674);; Molecular Function: catalytic activity (GO:0003824);; Cellular Component: cellular_component (GO:0005575);; Cellular Component: intracellular (GO:0005622);; Cellular Component: cell (GO:0005623);; Cellular Component: cytoplasm (GO:0005737);; Cellular Component: cytosol (GO:0005829);; Cellular Component: cell-cell junction (GO:0005911);; Biolog…	K12450|0.0e+00|egr:104450065|K12450 UDP-glucose 4,6-dehydratase [EC:4.2.1.76] | (RefSeq) trifunctional UDP-glucose 4,6-dehydratase/UDP-4-keto-6-deoxy-D-glucose 3,5-epimerase/UDP-4-keto-L-rhamnose-reductase RHM1	Carbohydrate transport and metabolism	GDP-mannose 4,6 dehydratase	Trifunctional UDP-glucose 4,6-dehydratase/UDP-4-keto-6-deoxy-D-glucose 3,5-epimerase/UDP-4-keto-L-rhamnose-reductase RHM1 OS=Arabidopsis thaliana OX=3702 GN=RHM1 PE=1 SV=1	Carbohydrate transport and metabolism	hypothetical protein C3L33_11837, partial [Rhododendron williamsianum]
VaccDscaff1-augustus-gene-398.30	8.06548	7.03585	6.90234	20.3535	20.2888	23.4934	42.2107	39.4173	43.6156	29.0982	27.8121	27.389	19.6947	18.9176	21.6059	15.0149	12.9674	13.7765	6.24e-44	1.62839	up	1.34e-165	2.67583	up	2.17e-89	2.05402	up	1.18e-41	1.59999	up	9.36e-18	1.06949	up	Secondary metabolites biosynthesis, transport and catabolism	Molecular Function: oxidoreductase activity (GO:0016491);; Molecular Function: metal ion binding (GO:0046872);;	K04125|1.9e-149|pop:7459116|K04125 gibberellin 2beta-dioxygenase [EC:1.14.11.13] | (RefSeq) gibberellin 2-beta-dioxygenase 1	Secondary metabolites biosynthesis, transport and catabolism;; General function prediction only	2OG-Fe(II) oxygenase superfamily	Gibberellin 2-beta-dioxygenase 1 OS=Pisum sativum OX=3888 GN=GA2OX1 PE=1 SV=1	Secondary metabolites biosynthesis, transport and catabolism	hypothetical protein F0562_008109 [Nyssa sinensis]
VaccDscaff1-augustus-gene-4.37	0.305402	0.718966	0.329446	0.559994	0.411055	0.577661	0.621356	0.565078	0.906116	0.938699	1.02688	0.888763	0.928688	1.0573	1.15674	0.843414	1.23693	0.743898	0.758315	0.220024	normal	0.187209	0.701747	normal	0.021631	1.05463	normal	0.006036	1.24832	up	0.0268089	1.09034	normal	--	Molecular Function: GTP binding (GO:0005525);; Cellular Component: integral component of membrane (GO:0016021);;	K15121|1.1e-145|cmo:103483917|K15121 solute carrier family 25, member 44 | (RefSeq) solute carrier family 25 member 44-like	Energy production and conversion	Mitochondrial carrier protein	ADP-ribosylation factor 1 OS=Arabidopsis thaliana OX=3702 GN=ARF1 PE=1 SV=2	Energy production and conversion	hypothetical protein EZV62_000040 [Acer yangbiense]
VaccDscaff1-augustus-gene-410.32	3.39663	3.10886	1.93135	2.08493	1.4683	2.89157	0	0.022756	1.92372	0.670592	0.809191	0	0.669468	1.59529	0.049852	0.871589	0.253522	0.924376	0.658375	-0.224054	normal	0.502435	-0.53928	normal	0.212204	-0.974456	normal	0.205197	-1.07452	normal	5.27e-05	-1.72053	down	Energy production and conversion	Biological Process: tricarboxylic acid cycle (GO:0006099);; Molecular Function: phosphoenolpyruvate carboxylase activity (GO:0008964);; Biological Process: carbon fixation (GO:0015977);;	K01595|3.8e-67|egr:104448531|K01595 phosphoenolpyruvate carboxylase [EC:4.1.1.31] | (RefSeq) phosphoenolpyruvate carboxylase, housekeeping isozyme	--	Phosphoenolpyruvate carboxylase	Phosphoenolpyruvate carboxylase 1 OS=Sorghum bicolor OX=4558 GN=PEPC PE=2 SV=1	Energy production and conversion	phosphoenolpyruvate carboxylase [Vaccinium corymbosum]
VaccDscaff1-augustus-gene-411.35	2.92962	2.63877	2.40022	2.66747	2.56464	2.54772	1.8461	1.60082	1.62704	1.10087	1.03226	0.841688	0.746719	0.702647	0.70926	0.914971	1.22187	0.97108	0.774929	0.0864261	normal	0.0196099	-0.457832	normal	9.04e-10	-1.24703	down	2.96e-15	-1.67635	down	2.12e-08	-1.18082	down	--	Biological Process: response to acid chemical (GO:0001101);; Molecular Function: protein binding (GO:0005515);; Biological Process: response to stress (GO:0006950);; Biological Process: response to osmotic stress (GO:0006970);; Biological Process: biological_process (GO:0008150);; Biological Process: response to abiotic stimulus (GO:0009628);; Biological Process: response to salt stress (GO:00096…	K09527|1.6e-110|pmum:103319855|K09527 DnaJ homolog subfamily C member 7 | (RefSeq) TPR repeat-containing thioredoxin TTL1	General function prediction only	Tetratricopeptide repeat	TPR repeat-containing thioredoxin TTL1 OS=Arabidopsis thaliana OX=3702 GN=TTL1 PE=1 SV=1	Posttranslational modification, protein turnover, chaperones	hypothetical protein C3L33_11723, partial [Rhododendron williamsianum]
VaccDscaff1-augustus-gene-414.40	2.02073	2.42771	2.65551	2.8466	2.3177	2.49275	2.8543	3.30354	3.01018	4.66054	4.68459	5.297	4.5607	4.45424	4.95213	4.80806	5.56527	5.8674	0.502131	0.218933	normal	0.0116735	0.540808	normal	3.9e-10	1.15118	up	1.91e-09	1.1173	up	4.96e-13	1.32798	up	Secondary metabolites biosynthesis, transport and catabolism	Molecular Function: molecular_function (GO:0003674);; Molecular Function: catalytic activity (GO:0003824);; Molecular Function: homogentisate 1,2-dioxygenase activity (GO:0004411);; Cellular Component: cellular_component (GO:0005575);; Cellular Component: intracellular (GO:0005622);; Cellular Component: cell (GO:0005623);; Cellular Component: cytoplasm (GO:0005737);; Cellular Component: cytosol (…	K00451|2.4e-254|sot:102579798|K00451 homogentisate 1,2-dioxygenase [EC:1.13.11.5] | (RefSeq) homogentisate 1,2-dioxygenase	Amino acid transport and metabolism	homogentisate 1,2-dioxygenase	Homogentisate 1,2-dioxygenase OS=Arabidopsis thaliana OX=3702 GN=HGO PE=2 SV=2	Amino acid transport and metabolism	hypothetical protein C3L33_11710, partial [Rhododendron williamsianum]
VaccDscaff1-augustus-gene-416.35	3.15672	2.46334	1.60086	2.85072	2.96161	2.32057	1.386	1.93307	3.29026	13.3248	13.1717	10.2319	9.50816	8.74072	10.2308	16.8574	17.1568	16.2702	0.491255	0.266498	normal	0.914488	0.0530703	normal	1.96e-31	2.40779	up	6.56e-24	2.09294	up	4.78e-56	2.90488	up	Amino acid transport and metabolism	Biological Process: cellular amino acid metabolic process (GO:0006520);; Molecular Function: transaminase activity (GO:0008483);; Biological Process: biosynthetic process (GO:0009058);; Molecular Function: pyridoxal phosphate binding (GO:0030170);;	K00815|2.6e-191|jcu:105637437|K00815 tyrosine aminotransferase [EC:2.6.1.5] | (RefSeq) probable aminotransferase TAT2	Amino acid transport and metabolism	Aminotransferase class I and II	Probable aminotransferase TAT2 OS=Arabidopsis thaliana OX=3702 GN=At5g53970 PE=2 SV=1	Amino acid transport and metabolism	aromatic amino acid aminotransferase 1 [Camellia sinensis]
VaccDscaff1-augustus-gene-418.36	0.640162	0.798677	0.771919	0.41382	0.225423	0.295978	0.35827	0.378373	0.402957	0.234176	0.271812	0.286372	0.310417	0.226284	0.327942	0.479692	0.223183	0.509038	0.0114149	-0.910771	normal	0.0289751	-0.732396	normal	0.000316197	-1.24854	down	0.00245536	-1.10334	down	0.114954	-0.663981	normal	--	Biological Process: mitochondrial fission (GO:0000266);; Biological Process: mitotic cell cycle (GO:0000278);; Biological Process: mitotic cytokinesis (GO:0000281);; Biological Process: cytokinesis (GO:0000910);; Biological Process: cytokinesis by cell plate formation (GO:0000911);; Molecular Function: molecular_function (GO:0003674);; Molecular Function: catalytic activity (GO:0003824);; Molecul…	K17065|4.3e-17|fve:101305238|K17065 dynamin 1-like protein [EC:3.6.5.5] | (RefSeq) dynamin-related protein 3A-like	Intracellular trafficking, secretion, and vesicular transport;; General function prediction only	Dynamin family	Dynamin-related protein 5A OS=Arabidopsis thaliana OX=3702 GN=DRP5A PE=2 SV=1	Intracellular trafficking, secretion, and vesicular transport	hypothetical protein C3L33_11689, partial [Rhododendron williamsianum]
VaccDscaff1-augustus-gene-420.31	8.21802	7.89634	6.75001	8.43386	5.06231	8.73297	7.92187	7.45523	7.89262	6.46741	6.92884	6.25401	4.97198	5.16507	4.04774	2.76551	3.93882	3.14124	0.828022	0.0808069	normal	0.108936	0.208938	normal	0.632788	-0.083558	normal	0.00161929	-0.516677	normal	2.73e-10	-1.05009	down	Lipid transport and metabolism;; Secondary metabolites biosynthesis, transport and catabolism;; General function prediction only	Molecular Function: molecular_function (GO:0003674);; Molecular Function: catalytic activity (GO:0003824);; Molecular Function: binding (GO:0005488);; Molecular Function: protein binding (GO:0005515);; Cellular Component: cellular_component (GO:0005575);; Cellular Component: intracellular (GO:0005622);; Cellular Component: cell (GO:0005623);; Cellular Component: cytoplasm (GO:0005737);; Biologica…	K00218|5.5e-195|vvi:100255647|K00218 protochlorophyllide reductase [EC:1.3.1.33] | (RefSeq) protochlorophyllide reductase, chloroplastic	Secondary metabolites biosynthesis, transport and catabolism	short chain dehydrogenase	Protochlorophyllide reductase, chloroplastic OS=Cucumis sativus OX=3659 GN=PORA PE=2 SV=1	Secondary metabolites biosynthesis, transport and catabolism	hypothetical protein C3L33_11677, partial [Rhododendron williamsianum]
VaccDscaff1-augustus-gene-421.19	9.30038	9.47792	10.2699	9.36506	11.1321	10.5504	22.9509	21.7981	21.2688	44.9081	48.1565	50.2163	42.826	45.6264	37.8471	51.1771	50.7647	47.3434	0.228433	0.21396	normal	2.03e-43	1.3618	up	1.94e-135	2.42053	up	1.04e-85	2.26898	up	4.1e-192	2.50743	up	--	Cellular Component: cellular_component (GO:0005575);; Cellular Component: intracellular (GO:0005622);; Cellular Component: cell (GO:0005623);; Cellular Component: cytoplasm (GO:0005737);; Cellular Component: peroxisome (GO:0005777);; Cellular Component: peroxisomal membrane (GO:0005778);; Cellular Component: integral component of peroxisomal membrane (GO:0005779);; Cellular Component: membrane (G…	K13348|2.1e-147|nsy:104220752|K13348 protein Mpv17 | (RefSeq) uncharacterized protein LOC104220752	General function prediction only	Mpv17 / PMP22 family	--	Function unknown	hypothetical protein C3L33_11673, partial [Rhododendron williamsianum]
VaccDscaff1-augustus-gene-421.21	53.6665	55.6921	48.8433	56.3869	56.9485	56.85	33.191	29.2367	29.3179	24.1161	21.0324	21.422	19.7753	17.9511	21.0546	14.1412	14.5552	13.4585	0.0075599	0.228482	normal	2.42e-10	-0.596928	normal	4.31e-36	-1.10931	down	1.47e-38	-1.26131	down	2.76e-84	-1.74762	down	--	--	--	--	Root cap	--	Function unknown	Cobyrinate a,c-diamide synthase [Actinidia chinensis var. chinensis]
VaccDscaff1-augustus-gene-423.37	2.06312	1.70904	2.52876	0.812937	1.38686	1.17206	0.95404	0.77084	0.810058	1.74579	1.05668	1.14867	1.14247	1.42533	1.17797	1.65333	1.58348	1.43746	0.00900879	-0.708645	normal	8.83e-07	-1.09947	down	0.0504853	-0.526774	normal	0.0163115	-0.575143	normal	0.248956	-0.274043	normal	--	Molecular Function: motor activity (GO:0003774);; Molecular Function: actin binding (GO:0003779);; Molecular Function: ATP binding (GO:0005524);; Cellular Component: myosin complex (GO:0016459);;	K10357|0.0e+00|oeu:111394761|K10357 myosin V | (RefSeq) myosin-2	Cytoskeleton	Myosin head (motor domain)	Myosin-2 OS=Arabidopsis thaliana OX=3702 GN=VIII-2 PE=2 SV=1	Cytoskeleton	Myosin-2 like [Actinidia chinensis var. chinensis]
VaccDscaff1-augustus-gene-427.31	3.42216	3.73731	3.27169	3.08117	2.70733	4.37775	2.53237	2.76725	2.61456	0.786034	1.05184	0.435551	0.360751	0.28328	0.114047	0	0.102223	0.356043	0.856252	0.0828659	normal	0.385551	-0.206541	normal	4.76e-10	-1.91815	down	8.98e-22	-3.32058	down	0.00282634	-2.44696	down	--	--	K03283|6.4e-32|cann:107854185|K03283 heat shock 70kDa protein 1/2/6/8 | (RefSeq) heat shock cognate 70 kDa protein 2-like	--	Lecithin retinol acyltransferase	Protein LEAD-SENSITIVE 1 OS=Arabidopsis thaliana OX=3702 GN=PSE1 PE=2 SV=1	Function unknown	LRAT-like domain [Macleaya cordata]
VaccDscaff1-augustus-gene-432.26	9.58421	10.5295	5.66278	8.53582	7.37202	8.26111	4.11848	5.26586	4.57559	3.32786	1.44421	1.87327	2.26158	2.60792	1.92525	1.78663	1.02201	0.717938	0.946515	0.0342718	normal	0.0167544	-0.669277	normal	3.22e-07	-1.69636	down	1.16e-08	-1.67904	down	4.4e-13	-2.53914	down	--	--	--	--	Protein of unknown function, DUF538	--	Function unknown	hypothetical protein C3L33_11630, partial [Rhododendron williamsianum]
VaccDscaff1-augustus-gene-433.41	1.09995	1.27425	0.680607	1.89931	3.2079	3.23468	3.05895	2.40607	3.45057	2.72287	1.97645	2.33219	1.75595	0.658407	0.511307	1.80535	1.05202	1.39357	0.00019784	1.26699	up	1.24e-06	1.60274	up	0.000551737	1.2172	up	0.894032	0.100062	normal	0.223776	0.570933	normal	Posttranslational modification, protein turnover, chaperones	--	K13993|3.7e-15|cmax:111478336|K13993 HSP20 family protein | (RefSeq) 18.1 kDa class I heat shock protein-like	--	Hsp20/alpha crystallin family	21.7 kDa class VI heat shock protein OS=Arabidopsis thaliana OX=3702 GN=HSP21.7 PE=2 SV=1	Function unknown	hypothetical protein C3L33_11619, partial [Rhododendron williamsianum]
VaccDscaff1-augustus-gene-434.23	15.9883	20.9221	19.2998	16.536	15.8907	17.2591	8.38011	10.2489	9.81597	9.24371	10.7246	8.89694	7.80555	7.70545	7.22151	15.3586	13.6594	15.5994	0.844651	-0.0495809	normal	2.8e-08	-0.787575	normal	6.38e-08	-0.814002	normal	4.08e-15	-1.12927	down	0.253933	-0.176483	normal	Coenzyme transport and metabolism	Molecular Function: molecular_function (GO:0003674);; Molecular Function: binding (GO:0005488);; Molecular Function: iron ion binding (GO:0005506);; Cellular Component: cellular_component (GO:0005575);; Cellular Component: intracellular (GO:0005622);; Cellular Component: cell (GO:0005623);; Cellular Component: cytoplasm (GO:0005737);; Cellular Component: cytosol (GO:0005829);; Biological Process:…	K03146|2.8e-162|cit:102626594|K03146 cysteine-dependent adenosine diphosphate thiazole synthase [EC:2.4.2.60] | (RefSeq) thiamine thiazole synthase, chloroplastic	General function prediction only	Thi4 family	Thiamine thiazole synthase, chloroplastic OS=Citrus sinensis OX=2711 GN=THI1 PE=2 SV=1	Coenzyme transport and metabolism	hypothetical protein C3L33_11612, partial [Rhododendron williamsianum]
VaccDscaff1-augustus-gene-436.33	0.864362	1.09262	1.26254	0.82778	1.02445	0.858814	0.820227	0.662785	0.793379	0.847886	0.964735	1.01189	1.61267	1.37322	1.02168	2.25471	1.79889	2.40089	0.901125	-0.0963863	normal	--	--	--	--	--	--	0.385327	0.447447	normal	0.00416796	1.08968	up	--	Cellular Component: cellular_component (GO:0005575);; Cellular Component: intracellular (GO:0005622);; Cellular Component: cell (GO:0005623);; Cellular Component: cytoplasm (GO:0005737);; Biological Process: transport (GO:0006810);; Biological Process: intracellular protein transport (GO:0006886);; Biological Process: organelle organization (GO:0006996);; Biological Process: protein localization …	--	--	--	Protein LHCP TRANSLOCATION DEFECT OS=Arabidopsis thaliana OX=3702 GN=LTD PE=1 SV=1	Function unknown	hypothetical protein C3L33_11601, partial [Rhododendron williamsianum]
VaccDscaff1-augustus-gene-437.22	2.79171	4.02008	2.82587	5.12202	4.65095	5.78032	11.501	11.6956	12.5462	6.13166	5.17427	5.14158	5.69204	4.21546	5.79655	5.15196	4.05262	5.32608	7.69e-05	0.774607	normal	3.76e-43	2.05	up	2.4e-06	0.887203	normal	6.21e-05	0.851077	normal	0.000404543	0.737448	normal	Carbohydrate transport and metabolism	Cellular Component: integral component of membrane (GO:0016021);;	--	--	BT1 family	Probable folate-biopterin transporter 4 OS=Arabidopsis thaliana OX=3702 GN=At5g54860 PE=2 SV=1	Function unknown	Folate-biopterin transporter like [Actinidia chinensis var. chinensis]
VaccDscaff1-augustus-gene-44.27	3.29465	3.52542	2.47124	1.70661	1.69026	2.18388	1.41674	1.35491	1.1214	1.42057	1.47954	1.304	0.733388	0.570304	1.01176	1.61201	1.10664	1.33108	0.0235641	-0.564365	normal	6.42e-06	-1.03602	down	1.35e-05	-0.973133	normal	4.56e-11	-1.78007	down	2.65e-05	-1.01171	down	Signal transduction mechanisms	Molecular Function: molecular_function (GO:0003674);; Molecular Function: catalytic activity (GO:0003824);; Molecular Function: protein kinase activity (GO:0004672);; Molecular Function: protein serine/threonine kinase activity (GO:0004674);; Molecular Function: cyclin-dependent protein serine/threonine kinase activity (GO:0004693);; Molecular Function: ATP binding (GO:0005524);; Cellular Compone…	K08819|8.1e-276|vvi:100240938|K08819 cyclin-dependent kinase 12/13 [EC:2.7.11.22 2.7.11.23] | (RefSeq) probable serine/threonine-protein kinase At1g54610	Cell cycle control, cell division, chromosome partitioning	Protein kinase domain	Probable serine/threonine-protein kinase At1g54610 OS=Arabidopsis thaliana OX=3702 GN=At1g54610 PE=1 SV=1	Signal transduction mechanisms	hypothetical protein C3L33_12834, partial [Rhododendron williamsianum]
VaccDscaff1-augustus-gene-44.34	2.50248	2.82119	2.65768	1.45104	1.55034	1.64167	1.18097	1.30435	0.935765	1.39517	1.38861	1.46392	1.59908	1.16323	0.825383	1.47303	1.24808	1.38845	0.00299849	-0.618426	normal	5.36e-06	-1.00778	down	0.000141917	-0.760159	normal	0.000933963	-0.940664	normal	8.75e-05	-0.789151	normal	--	Molecular Function: molecular_function (GO:0003674);; Molecular Function: transcription factor activity, sequence-specific DNA binding (GO:0003700);; Molecular Function: binding (GO:0005488);; Molecular Function: protein binding (GO:0005515);; Molecular Function: phospholipid binding (GO:0005543);; Biological Process: regulation of transcription, DNA-templated (GO:0006355);; Biological Process: b…	K19600|2.6e-47|mis:MICPUN_63330|K19600 tubby-related protein 1 | (RefSeq) tubby-like protein	General function prediction only	Tub family	Tubby-like F-box protein 3 OS=Arabidopsis thaliana OX=3702 GN=TULP3 PE=1 SV=1	Function unknown	Tubby-like F-box protein [Actinidia chinensis var. chinensis]
VaccDscaff1-augustus-gene-441.31	5.50635	6.47201	6.8576	4.43154	4.2897	4.38188	2.82785	2.83909	3.30035	2.90463	2.1488	2.77771	2.35006	2.12641	2.40148	3.16849	3.03789	2.67155	0.00819561	-0.387705	normal	7e-10	-0.8752	normal	5.3e-13	-1.11786	down	3.52e-18	-1.27859	down	1.42e-10	-0.923106	normal	--	Molecular Function: molecular_function (GO:0003674);; Molecular Function: binding (GO:0005488);; Molecular Function: protein binding (GO:0005515);; Molecular Function: histone binding (GO:0042393);; Molecular Function: lysine-acetylated histone binding (GO:0070577);; Molecular Function: modification-dependent protein binding (GO:0140030);; Molecular Function: acetylation-dependent protein binding…	K22184|1.6e-211|vvi:100267501|K22184 bromodomain-containing protein 9 | (RefSeq) uncharacterized LOC100267501	--	Bromodomain	Transcription factor GTE10 OS=Arabidopsis thaliana OX=3702 GN=GTE10 PE=1 SV=2	Function unknown	hypothetical protein C3L33_11572, partial [Rhododendron williamsianum]
VaccDscaff1-augustus-gene-442.31	2.45608	1.45086	2.22152	2.0059	1.56971	1.62652	0.420826	1.05193	0.723785	1.57455	1.0282	1.17146	0.609408	1.19284	0.598347	1.02638	1.25531	1.46716	0.870663	-0.0945948	normal	0.00393307	-1.17637	down	0.157899	-0.532204	normal	0.00894716	-1.08785	down	0.160366	-0.523523	normal	Transcription	Molecular Function: RNA binding (GO:0003723);; Molecular Function: ribonuclease III activity (GO:0004525);; Biological Process: RNA processing (GO:0006396);;	K11592|5.7e-54|bna:106375864|K11592 endoribonuclease Dicer [EC:3.1.26.-] | (RefSeq) endoribonuclease Dicer homolog 1	RNA processing and modification	Ribonuclease III domain	Ribonuclease 3-like protein 2 OS=Arabidopsis thaliana OX=3702 GN=RTL2 PE=1 SV=1	RNA processing and modification	Ribonuclease 3-like protein [Actinidia chinensis var. chinensis]
VaccDscaff1-augustus-gene-444.27	0.792879	0.692038	0.978746	0.803014	0.289322	0.80574	0.404138	0.184539	0.248608	0.537678	0.588546	0.693305	0.665323	0.343897	0.51088	0.939888	0.869598	0.844296	0.800349	-0.17403	normal	0.00679778	-1.21265	down	0.53386	-0.286776	normal	0.30915	-0.486276	normal	0.533687	0.252455	normal	Posttranslational modification, protein turnover, chaperones	Biological Process: protein folding (GO:0006457);; Biological Process: protein transport (GO:0015031);;	K03545|3.1e-221|qsu:112016925|K03545 trigger factor | (RefSeq) trigger factor-like protein TIG, Chloroplastic	--	Bacterial trigger factor protein (TF) C-terminus	Trigger factor-like protein TIG, Chloroplastic OS=Arabidopsis thaliana OX=3702 GN=TIG PE=1 SV=1	Posttranslational modification, protein turnover, chaperones	Trigger factor-like protein TIG, Chloroplastic [Actinidia chinensis var. chinensis]
VaccDscaff1-augustus-gene-444.28	11.3117	11.8526	8.95744	6.3789	6.51858	6.05331	4.26787	4.65742	5.02847	3.99566	3.17604	2.6835	2.97327	2.86231	4.20335	3.31955	3.80053	3.13975	1.27e-05	-0.616999	normal	2.57e-12	-1.00502	down	2.59e-19	-1.53841	down	7.58e-17	-1.49646	down	4.86e-22	-1.47706	down	--	Biological Process: microtubule cytoskeleton organization (GO:0000226);; Molecular Function: microtubule binding (GO:0008017);;	K16732|1.2e-252|qsu:112012954|K16732 protein regulator of cytokinesis 1 | (RefSeq) 65-kDa microtubule-associated protein 1-like	Cell cycle control, cell division, chromosome partitioning;; Cytoskeleton	Microtubule associated protein (MAP65/ASE1 family)	65-kDa microtubule-associated protein 1 OS=Arabidopsis thaliana OX=3702 GN=MAP65-1 PE=1 SV=1	--	Microtubule-associated protein [Actinidia chinensis var. chinensis]
VaccDscaff1-augustus-gene-445.16	34.4641	35.1284	30.3303	41.225	40.8372	45.9567	25.204	23.2133	15.1583	12.0792	9.09273	10.6846	8.14861	7.92869	8.42864	7.5833	6.77941	7.38966	3.22e-09	0.478633	normal	0.00763439	-0.45845	normal	5.85e-51	-1.50806	down	4.4e-102	-1.85842	down	1.74e-132	-2.03786	down	Function unknown	Biological Process: cell morphogenesis (GO:0000902);; Biological Process: cell morphogenesis involved in differentiation (GO:0000904);; Molecular Function: molecular_function (GO:0003674);; Molecular Function: catalytic activity (GO:0003824);; Molecular Function: binding (GO:0005488);; Molecular Function: calcium ion binding (GO:0005509);; Cellular Component: cellular_component (GO:0005575);; Cel…	K01126|2.5e-19|hbr:110650283|K01126 glycerophosphoryl diester phosphodiesterase [EC:3.1.4.46] | (RefSeq) glycerophosphodiester phosphodiesterase GDPD6-like isoform X1	Energy production and conversion	Glycerophosphoryl diester phosphodiesterase family	Glycerophosphodiester phosphodiesterase GDPDL3 OS=Arabidopsis thaliana OX=3702 GN=GDPDL3 PE=2 SV=3	Energy production and conversion	hypothetical protein C3L33_11546, partial [Rhododendron williamsianum]
VaccDscaff1-augustus-gene-446.33	3.13162	3.49891	2.88812	3.3337	3.09303	3.35213	2.28252	2.37741	2.42139	2.11575	1.71855	1.88543	1.03352	1.11487	1.01552	0.889108	0.856495	0.989733	0.564364	0.157945	normal	0.266768	-0.237495	normal	0.00468184	-0.584272	normal	4.43e-10	-1.38714	down	1.81e-13	-1.59914	down	--	--	--	--	--	--	Function unknown	uncharacterized protein LOC114318819 [Camellia sinensis]
VaccDscaff1-augustus-gene-447.29	4.21645	7.11741	4.1292	7.30899	5.78148	6.81417	11.0245	9.64244	9.14879	6.21756	5.77862	6.12958	5.83656	5.70925	8.04332	6.18812	4.23416	5.36915	0.112834	0.455245	normal	6.55e-07	1.10712	up	0.203709	0.353837	normal	0.0827253	0.489552	normal	0.574388	0.186113	normal	Signal transduction mechanisms	Molecular Function: molecular_function (GO:0003674);; Molecular Function: catalytic activity (GO:0003824);; Molecular Function: protein kinase activity (GO:0004672);; Molecular Function: protein serine/threonine kinase activity (GO:0004674);; Molecular Function: ATP binding (GO:0005524);; Cellular Component: cellular_component (GO:0005575);; Cellular Component: intracellular (GO:0005622);; Cellul…	K08867|5.3e-146|cam:101501137|K08867 WNK lysine deficient protein kinase [EC:2.7.11.1] | (RefSeq) probable serine/threonine-protein kinase WNK11	General function prediction only	Protein kinase domain	Probable serine/threonine-protein kinase WNK11 OS=Arabidopsis thaliana OX=3702 GN=WNK11 PE=2 SV=1	Signal transduction mechanisms	hypothetical protein C3L33_11540, partial [Rhododendron williamsianum]
VaccDscaff1-augustus-gene-447.30	10.6544	11.3231	9.69654	26.1568	23.0219	26.5685	13.4141	15.3227	13.655	4.35259	4.22196	5.50405	5.45074	4.59028	5.37422	4.49833	3.71319	4.7081	1.48e-40	1.35927	up	4.52e-07	0.601056	normal	2.05e-10	-1.02286	down	7.79e-09	-0.86621	normal	9.85e-14	-1.122	down	--	Molecular Function: molecular_function (GO:0003674);; Molecular Function: nucleic acid binding (GO:0003676);; Molecular Function: DNA binding (GO:0003677);; Molecular Function: transcription factor activity, sequence-specific DNA binding (GO:0003700);; Molecular Function: binding (GO:0005488);; Cellular Component: cellular_component (GO:0005575);; Cellular Component: intracellular (GO:0005622);; …	K14494|6.3e-61|pop:18099385|K14494 DELLA protein | (RefSeq) DELLA protein GAI	--	GRAS domain family	Scarecrow-like transcription factor PAT1 OS=Arabidopsis thaliana OX=3702 GN=PAT1 PE=1 SV=1	Transcription	hypothetical protein C3L33_11537, partial [Rhododendron williamsianum]
VaccDscaff1-augustus-gene-448.48	9.43827	8.40911	7.05437	8.28416	11.001	10.5139	11.6338	12.667	12.2843	4.36209	3.78669	4.48231	5.0815	4.70392	6.19372	3.82859	3.07999	3.33165	0.0807575	0.366141	normal	1.88e-07	0.729804	normal	1.7e-06	-0.834374	normal	0.0139201	-0.475562	normal	5.91e-10	-1.11217	down	--	Biological Process: transition metal ion transport (GO:0000041);; Molecular Function: molecular_function (GO:0003674);; Molecular Function: transporter activity (GO:0005215);; Molecular Function: zinc ion transmembrane transporter activity (GO:0005385);; Cellular Component: cellular_component (GO:0005575);; Biological Process: transport (GO:0006810);; Biological Process: ion transport (GO:0006811…	K14709|3.1e-121|tcc:18593308|K14709 solute carrier family 39 (zinc transporter), member 1/2/3 | (RefSeq) zinc transporter 11	Inorganic ion transport and metabolism	ZIP Zinc transporter	Zinc transporter 11 OS=Arabidopsis thaliana OX=3702 GN=ZIP11 PE=2 SV=1	Inorganic ion transport and metabolism	hypothetical protein C3L33_11529, partial [Rhododendron williamsianum]
VaccDscaff1-augustus-gene-45.25	1.42206	1.48274	1.50633	1.16561	0.812251	1.01144	0.982948	0.935039	0.921365	0.588599	0.664624	0.477301	0.622222	0.544607	0.751741	0.64997	0.493159	0.634687	0.0940131	-0.404533	normal	0.0189005	-0.443769	normal	3.96e-08	-1.17744	down	1.76e-06	-1.01884	down	4.06e-08	-1.12914	down	Signal transduction mechanisms	Molecular Function: protein kinase activity (GO:0004672);; Molecular Function: ATP binding (GO:0005524);;	K17545|0.0e+00|vvi:100259712|K17545 serine/threonine-protein kinase ULK4 [EC:2.7.11.1] | (RefSeq) serine/threonine-protein kinase RUNKEL	General function prediction only	Protein kinase domain	Serine/threonine-protein kinase RUNKEL OS=Arabidopsis thaliana OX=3702 GN=RUK PE=1 SV=1	Signal transduction mechanisms	Serine/threonine-protein kinase [Actinidia chinensis var. chinensis]
VaccDscaff1-augustus-gene-452.35	4.59006	4.70813	3.76409	3.29536	3.75552	3.24549	8.2265	7.67744	8.29103	5.91095	4.70574	5.2569	6.98606	4.60274	4.31489	5.18671	5.63726	5.0342	0.388522	-0.211366	normal	4.05e-16	1.06319	up	0.0157841	0.407685	normal	0.0686096	0.443074	normal	0.00688217	0.429082	normal	Cell motility	Cellular Component: integral component of membrane (GO:0016021);; Molecular Function: cellulose synthase (UDP-forming) activity (GO:0016760);; Biological Process: cellulose biosynthetic process (GO:0030244);; Biological Process: cell wall organization (GO:0071555);;	K10999|2.0e-97|mdm:103446310|K10999 cellulose synthase A [EC:2.4.1.12] | (RefSeq) LOW QUALITY PROTEIN: cellulose synthase A catalytic subunit 8 [UDP-forming]	--	Cellulose synthase	Cellulose synthase-like protein E1 OS=Arabidopsis thaliana OX=3702 GN=CSLE1 PE=2 SV=1	Carbohydrate transport and metabolism	Cellulose synthase-like protein [Actinidia chinensis var. chinensis]
VaccDscaff1-augustus-gene-452.36	4.34598	5.49098	4.51452	7.4409	5.90493	7.33142	10.4573	9.95094	10.6241	12.3945	9.1303	12.3803	10.1224	10.9621	11.4281	9.29825	8.28832	8.85657	0.000552631	0.626153	normal	1.94e-20	1.28389	up	2.22e-16	1.34703	up	1.97e-19	1.32751	up	4.14e-12	1.02742	up	--	--	K02433|2.9e-20|apro:F751_6020|K02433 aspartyl-tRNA(Asn)/glutamyl-tRNA(Gln) amidotransferase subunit A [EC:6.3.5.6 6.3.5.7] | (RefSeq) Glutamyl-tRNA(Gln) amidotransferase subunit A	Lipid transport and metabolism	CRAL/TRIO domain	--	Lipid transport and metabolism	Phosphatidylinositol/phosphatidylcholine transfer protein [Actinidia chinensis var. chinensis]
VaccDscaff1-augustus-gene-453.26	5.22155	4.67079	4.90015	6.40631	6.3744	6.50392	4.33257	5.25673	4.73482	3.12795	3.21911	3.49208	2.43265	2.33578	2.91266	2.16727	1.91308	2.2676	0.000167383	0.495487	normal	0.443076	0.136911	normal	0.00466296	-0.451354	normal	3.1e-06	-0.777403	normal	2.1e-11	-1.05329	down	--	--	--	Function unknown	AI-2E family transporter	--	Defense mechanisms	hypothetical protein C3L33_11499, partial [Rhododendron williamsianum]
VaccDscaff1-augustus-gene-454.27	1.67684	1.60619	1.74486	0.80313	0.510523	0.640492	0.182711	0.165926	0.22924	0.265507	0.210036	0.307203	0.177253	0.217909	0.368991	0.248599	0.246677	0.354107	8.85e-07	-1.12767	down	3.49e-28	-2.79761	down	1.79e-23	-2.4563	down	2.01e-17	-2.46446	down	2.11e-20	-2.32629	down	Signal transduction mechanisms	Molecular Function: protein serine/threonine kinase activity (GO:0004674);; Molecular Function: ATP binding (GO:0005524);; Cellular Component: integral component of membrane (GO:0016021);;	K00924|1.4e-71|smo:SELMODRAFT_165220|K00924 kinase [EC:2.7.1.-] | (RefSeq) hypothetical protein	--	Leucine rich repeat	LRR receptor-like serine/threonine-protein kinase OS=Arabidopsis thaliana OX=3702 GN=RGI3 PE=1 SV=1	Signal transduction mechanisms	LRR receptor-like serine/threonine-protein kinase [Camellia sinensis]
VaccDscaff1-augustus-gene-459.28	3.13718	2.84343	2.78542	2.71129	2.29224	2.39306	3.16093	3.00138	3.2221	5.0767	4.51207	4.42652	5.15044	5.58258	6.1815	7.32081	7.40752	7.9823	0.742627	-0.113556	normal	0.168401	0.279654	normal	1.4e-06	0.79594	normal	2.49e-11	1.09275	up	1.58e-27	1.51306	up	Coenzyme transport and metabolism	Cellular Component: mitochondrion (GO:0005739);; Biological Process: heme a biosynthetic process (GO:0006784);; Cellular Component: integral component of membrane (GO:0016021);; Molecular Function: oxidoreductase activity, acting on the CH-CH group of donors (GO:0016627);;	K02259|2.8e-205|nto:104120308|K02259 cytochrome c oxidase assembly protein subunit 15 | (RefSeq) cytochrome c oxidase assembly protein COX15 isoform X1	Posttranslational modification, protein turnover, chaperones	Cytochrome oxidase assembly protein	Cytochrome c oxidase assembly protein COX15 OS=Arabidopsis thaliana OX=3702 GN=COX15 PE=2 SV=1	Posttranslational modification, protein turnover, chaperones	Cytochrome c oxidase assembly protein [Actinidia chinensis var. chinensis]
VaccDscaff1-augustus-gene-461.71	1.67552	1.77012	1.50957	1.34219	1.49636	1.74039	0.743021	0.640739	0.84474	0.65964	0.75393	1.01008	0.547161	0.53543	0.504628	0.75381	0.660128	1.1154	0.986541	0.00944623	normal	0.000241096	-0.934242	normal	0.00200659	-0.864832	normal	1.16e-07	-1.42229	down	0.00760349	-0.782335	normal	--	Molecular Function: transcription factor activity, sequence-specific DNA binding (GO:0003700);; Cellular Component: nucleus (GO:0005634);; Molecular Function: sequence-specific DNA binding (GO:0043565);;	K18835|3.4e-241|vvi:100261730|K18835 WRKY transcription factor 2 | (RefSeq) probable WRKY transcription factor 2	--	WRKY DNA -binding domain	Probable WRKY transcription factor 2 OS=Arabidopsis thaliana OX=3702 GN=WRKY2 PE=1 SV=1	Transcription	probable WRKY transcription factor 2 [Camellia sinensis]
VaccDscaff1-augustus-gene-49.17	0.91097	0.766032	0.756588	1.1147	0.901258	0.879213	1.59564	1.54682	1.78957	1.04822	0.855221	0.580436	0.917055	1.08021	0.959616	0.725857	0.597989	0.757678	0.346384	0.337411	normal	1.16e-07	1.1677	up	0.7075	0.159015	normal	0.153227	0.430427	normal	0.871514	-0.0636329	normal	Cell wall/membrane/envelope biogenesis	Molecular Function: protein kinase activity (GO:0004672);; Molecular Function: ATP binding (GO:0005524);; Cellular Component: integral component of membrane (GO:0016021);;	K13415|1.2e-112|han:110929858|K13415 protein brassinosteroid insensitive 1 [EC:2.7.10.1 2.7.11.1] | (RefSeq) systemin receptor SR160-like	--	Leucine rich repeat	MDIS1-interacting receptor like kinase 2 OS=Arabidopsis thaliana OX=3702 GN=MIK2 PE=1 SV=3	--	MDIS1-interacting receptor like kinase 2-like isoform X1 [Camellia sinensis]
VaccDscaff1-augustus-gene-55.31	2.27346	1.82082	2.07809	5.88295	4.54588	3.47925	3.38718	5.96016	3.28838	9.14386	8.51178	4.57756	10.1609	4.44041	5.75532	4.33345	5.03483	2.19565	1.02e-05	1.1577	up	0.000157604	1.1534	up	9.25e-12	1.88284	up	8.91e-09	1.79841	up	0.00411917	1.00523	up	--	Molecular Function: hydrolase activity (GO:0016787);;	K09651|8.8e-19|boe:106315955|K09651 rhomboid domain-containing protein 1 [EC:3.4.21.-] | (RefSeq) rhomboid-like protein 14, mitochondrial isoform X1	General function prediction only	Dienelactone hydrolase family	Endo-1,3;1,4-beta-D-glucanase OS=Zea mays OX=4577 PE=1 SV=1	Replication, recombination and repair	endo-1,3;1,4-beta-D-glucanase-like [Camellia sinensis]
VaccDscaff1-augustus-gene-6.18	3.2996	2.61878	2.69445	1.85823	1.68488	2.02161	1.04766	1.06589	0.971653	1.39226	1.25885	1.46268	1.40384	1.47544	1.63747	1.76465	1.77951	1.96152	0.000266621	-0.493523	normal	3.94e-25	-1.28558	down	2.06e-13	-0.926392	normal	5.46e-09	-0.766648	normal	0.000108491	-0.48892	normal	--	--	K19525|0.0e+00|vvi:100258011|K19525 vacuolar protein sorting-associated protein 13A/C | (RefSeq) uncharacterized LOC100258011	Intracellular trafficking, secretion, and vesicular transport	Vacuolar sorting-associated protein 13, N-terminal	--	Intracellular trafficking, secretion, and vesicular transport	hypothetical protein C3L33_13039, partial [Rhododendron williamsianum]
VaccDscaff1-augustus-gene-64.21	4.18787	5.30598	5.24428	3.8455	4.02136	3.96497	3.18436	3.47268	2.91747	2.33547	2.20938	2.16973	1.53835	0.984683	1.37973	0.967585	1.53195	1.19883	0.477188	-0.183958	normal	0.0286541	-0.428418	normal	1.43e-07	-0.978333	normal	1.09e-13	-1.70646	down	5.54e-15	-1.80042	down	--	Molecular Function: GTPase activity (GO:0003924);; Molecular Function: structural constituent of cytoskeleton (GO:0005200);; Molecular Function: GTP binding (GO:0005525);; Cellular Component: cytoplasm (GO:0005737);; Cellular Component: microtubule (GO:0005874);; Biological Process: microtubule-based process (GO:0007017);;	K07374|2.2e-257|dzi:111281785|K07374 tubulin alpha | (RefSeq) tubulin alpha-2 chain	Cytoskeleton	Tubulin/FtsZ family, GTPase domain	Tubulin alpha chain OS=Prunus dulcis OX=3755 GN=TUBA PE=2 SV=1	Cytoskeleton	hypothetical protein CBR_g11996 [Chara braunii]
VaccDscaff1-augustus-gene-65.27	3.61046	3.62382	3.48531	2.3025	2.75856	2.05303	1.04494	1.55841	0.9016	1.3824	1.54263	1.5274	1.19792	1.55324	1.09133	1.31024	1.54873	1.55375	0.046819	-0.442025	normal	8.22e-09	-1.37931	down	3.35e-09	-1.10963	down	6.37e-09	-1.28246	down	4.73e-09	-1.10751	down	--	Biological Process: metal ion transport (GO:0030001);; Molecular Function: metal ion binding (GO:0046872);;	--	Inorganic ion transport and metabolism	Heavy-metal-associated domain	Heavy metal-associated isoprenylated plant protein 32 OS=Arabidopsis thaliana OX=3702 GN=HIPP32 PE=2 SV=1	Inorganic ion transport and metabolism	Heavy metal-associated isoprenylated plant protein [Actinidia chinensis var. chinensis]
VaccDscaff1-augustus-gene-69.26	2.90693	2.54047	2.66095	3.35235	2.87911	3.75522	14.9833	14.9679	15.1647	6.61012	8.30867	8.73689	11.0278	11.5917	10.3334	6.79653	7.3192	7.142	0.0840806	0.401703	normal	6.17e-119	2.63666	up	1.86e-21	1.64416	up	2.77e-53	2.16172	up	8.02e-27	1.52783	up	Carbohydrate transport and metabolism	Biological Process: response to acid chemical (GO:0001101);; Molecular Function: molecular_function (GO:0003674);; Molecular Function: transporter activity (GO:0005215);; Molecular Function: sugar:proton symporter activity (GO:0005351);; Molecular Function: glucose transmembrane transporter activity (GO:0005355);; Molecular Function: hydrogen:glucose symporter activity (GO:0005356);; Molecular Fu…	K24193|1.1e-255|sind:105171358|K24193 MFS transporter, SP family, sugar:H+ symporter | (RefSeq) sugar transport protein 13	General function prediction only	Sugar (and other) transporter	Sugar transport protein 13 OS=Arabidopsis thaliana OX=3702 GN=STP13 PE=1 SV=2	Intracellular trafficking, secretion, and vesicular transport	hypothetical protein C3L33_12306, partial [Rhododendron williamsianum]
VaccDscaff1-augustus-gene-73.30	1.5045	1.91616	0.783936	1.56462	1.33424	0.822961	1.0587	0.744416	1.11713	0.989057	0.37996	0.38687	0.417209	0.196977	0.593352	0.357197	0.573817	0.401393	0.961358	-0.0351047	normal	0.467004	-0.309633	normal	0.0285689	-0.991895	normal	0.000647443	-1.48852	down	0.000333227	-1.40066	down	General function prediction only	Molecular Function: protein kinase activity (GO:0004672);; Molecular Function: ATP binding (GO:0005524);;	K20606|4.6e-241|hbr:110655229|K20606 mitogen-activated protein kinase kinase kinase ANP1 [EC:2.7.11.25] | (RefSeq) mitogen-activated protein kinase kinase kinase NPK1-like	Signal transduction mechanisms	Protein kinase domain	Mitogen-activated protein kinase kinase kinase NPK1 OS=Nicotiana tabacum OX=4097 GN=NPK1 PE=1 SV=1	Signal transduction mechanisms	Mitogen-activated protein kinase kinase [Actinidia chinensis var. chinensis]
VaccDscaff1-augustus-gene-75.26	1.56331	1.88184	1.92629	0.783799	0.898834	1.57159	1.16468	1.27598	0.697168	0.396244	0.362267	0.992161	0.945624	0.812177	1.06882	0.73467	0.377006	0.485669	0.245623	-0.489953	normal	0.129797	-0.551981	normal	0.00145217	-1.33191	down	0.0243282	-0.728261	normal	2.71e-05	-1.48913	down	Lipid transport and metabolism;; Secondary metabolites biosynthesis, transport and catabolism;; General function prediction only	Cellular Component: integral component of membrane (GO:0016021);; Molecular Function: oxidoreductase activity (GO:0016491);;	K04708|4.9e-129|pop:18102699|K04708 3-dehydrosphinganine reductase [EC:1.1.1.102] | (RefSeq) 3-dehydrosphinganine reductase TSC10A	Secondary metabolites biosynthesis, transport and catabolism	short chain dehydrogenase	3-dehydrosphinganine reductase TSC10A OS=Arabidopsis thaliana OX=3702 GN=TSC10A PE=1 SV=1	Secondary metabolites biosynthesis, transport and catabolism	3-dehydrosphinganine reductase TSC10A [Camellia sinensis]
VaccDscaff1-augustus-gene-77.29	2.48435	3.11666	3.22273	4.36032	2.62469	3.09342	1.63235	2.13328	1.91572	4.43102	4.84782	4.90499	4.54402	3.92033	3.82328	7.61097	7.43081	7.19112	0.422273	0.289512	normal	0.105694	-0.437182	normal	8.21e-05	0.798958	normal	0.00523447	0.629484	normal	1.62e-18	1.46984	up	Replication, recombination and repair	Molecular Function: nucleotidase activity (GO:0008252);;	K03787|9.5e-83|pmum:103324062|K03787 5'-nucleotidase [EC:3.1.3.5] | (RefSeq) 5'-nucleotidase SurE	--	Survival protein SurE	--	Function unknown	5'-nucleotidase [Actinidia chinensis var. chinensis]
VaccDscaff1-augustus-gene-79.40	8.38967	7.55147	8.56663	13.0575	14.5237	15.219	34.0006	40.6551	36.4861	19.8375	17.9651	20.1529	18.2431	16.957	18.7039	8.68276	8.58424	8.14833	3.78e-10	0.899469	normal	1.54e-91	2.34657	up	2.27e-27	1.35912	up	1.74e-22	1.2877	up	0.253013	0.202947	normal	Translation, ribosomal structure and biogenesis;; Posttranslational modification, protein turnover, chaperones	Molecular Function: N-acetyltransferase activity (GO:0008080);;	--	--	Acetyltransferase (GNAT) domain	--	Translation, ribosomal structure and biogenesis	hypothetical protein GOBAR_DD33354 [Gossypium barbadense]
VaccDscaff1-augustus-gene-81.19	0.809667	0.739745	0.820919	0.510982	0.172524	0.597433	0.564734	0.25925	0.464002	0.395666	0.376733	0.444969	0.347851	0.381601	0.53566	0.234585	0.244197	0.215638	0.238258	-0.57126	normal	0.123748	-0.636403	normal	0.0243984	-0.771323	normal	0.0595486	-0.703796	normal	1.86e-05	-1.51998	down	--	Biological Process: reproduction (GO:0000003);; Molecular Function: regulatory region nucleic acid binding (GO:0001067);; Biological Process: developmental process involved in reproduction (GO:0003006);; Molecular Function: molecular_function (GO:0003674);; Molecular Function: nucleic acid binding (GO:0003676);; Molecular Function: DNA binding (GO:0003677);; Molecular Function: transcription fact…	--	Inorganic ion transport and metabolism	Tesmin/TSO1-like CXC domain, cysteine-rich domain	CRC domain-containing protein TSO1 OS=Arabidopsis thaliana OX=3702 GN=TSO1 PE=1 SV=1	Inorganic ion transport and metabolism	hypothetical protein C3L33_12716, partial [Rhododendron williamsianum]
VaccDscaff1-augustus-gene-86.29	33.2704	38.8857	37.6243	36.3071	40.4658	37.3092	73.3283	83.7946	84.814	105.559	110.995	110.566	124.525	118.867	123.794	120.942	123.475	119.93	0.195824	0.177713	normal	4.42e-47	1.31825	up	8.05e-84	1.70082	up	7.27e-110	1.89706	up	5.5e-129	1.87985	up	General function prediction only	--	K01456|2.1e-108|pavi:110759676|K01456 peptide-N4-(N-acetyl-beta-glucosaminyl)asparagine amidase [EC:3.5.1.52] | (RefSeq) peptide-N(4)-(N-acetyl-beta- glucosaminyl)asparagine amidase-like	Energy production and conversion	Aldo/keto reductase family	Perakine reductase OS=Rauvolfia serpentina OX=4060 GN=PR PE=1 SV=1	Energy production and conversion	hypothetical protein C3L33_12703, partial [Rhododendron williamsianum]
VaccDscaff1-augustus-gene-87.21	1.74075	1.33211	4.25622	5.17441	2.61858	4.85239	5.20237	3.41841	4.6506	6.0829	5.77022	5.66502	3.66457	3.85315	3.68775	5.10765	4.11319	6.13463	0.126668	0.685992	normal	0.0265271	0.938132	normal	0.000953922	1.2595	up	0.112034	0.708501	normal	0.00681467	1.12585	up	Amino acid transport and metabolism	--	--	--	Aluminium induced protein	Stem-specific protein TSJT1 OS=Nicotiana tabacum OX=4097 GN=TSJT1 PE=2 SV=1	Function unknown	hypothetical protein C3L33_22298, partial [Rhododendron williamsianum]
VaccDscaff1-augustus-gene-88.20	6.25797	6.17654	6.76649	9.13633	9.41468	9.17798	28.6605	28.9136	30.9732	10.9652	10.9025	9.81203	10.0719	8.76545	10.1885	7.54729	8.62951	9.61172	2.28e-07	0.639005	normal	2.46e-148	2.37757	up	7.43e-12	0.847394	normal	1.51e-08	0.75048	normal	0.000112645	0.574963	normal	Inorganic ion transport and metabolism	Biological Process: sulfate assimilation (GO:0000103);; Molecular Function: adenylylsulfate kinase activity (GO:0004020);; Molecular Function: sulfate adenylyltransferase (ATP) activity (GO:0004781);;	K13811|3.1e-222|vvi:100259752|K13811 3'-phosphoadenosine 5'-phosphosulfate synthase [EC:2.7.7.4 2.7.1.25] | (RefSeq) ATP sulfurylase 1, chloroplastic-like	Inorganic ion transport and metabolism	ATP-sulfurylase	ATP sulfurylase 1, chloroplastic OS=Arabidopsis thaliana OX=3702 GN=APS1 PE=1 SV=1	Inorganic ion transport and metabolism	ATP sulfurylase 1, chloroplastic-like [Camellia sinensis]
VaccDscaff1-processed-gene-112.4	16.1349	14.7293	19.348	14.8705	18.9427	16.1466	8.27007	13.4499	6.51932	7.64067	11.5962	8.22024	2.78608	2.8424	2.87939	1.79016	2.1362	1.98782	0.73158	0.109751	normal	0.0276318	-0.622899	normal	0.00256257	-0.710932	normal	6.66e-29	-2.34193	down	8.2e-40	-2.86952	down	--	--	--	--	--	--	--	hypothetical protein C3L33_12643, partial [Rhododendron williamsianum]
VaccDscaff1-processed-gene-113.5	4.49201	3.26946	3.55485	3.68822	1.50761	4.29853	2.40663	2.89347	3.01896	8.58056	10.3217	10.2168	2.72593	3.38501	2.79266	2.71578	2.18844	3.38551	0.895963	-0.0947738	normal	0.529573	-0.245153	normal	1.78e-09	1.43774	up	0.681668	-0.173068	normal	0.492711	-0.277204	normal	--	--	--	--	--	--	--	--
VaccDscaff1-processed-gene-114.7	1.87932	1.18443	1.55489	2.36964	2.88185	3.02888	1.46461	3.03779	2.07232	1.83018	2.01748	0.622047	0.420311	0.582094	1.09808	0.0512	0.045198	0.299498	0.00195795	0.859036	normal	0.0798669	0.646413	normal	0.899755	0.0790049	normal	0.0395412	-0.918402	normal	1.49e-07	-2.84121	down	Carbohydrate transport and metabolism;; Amino acid transport and metabolism;; Inorganic ion transport and metabolism;; General function prediction only	Cellular Component: integral component of membrane (GO:0016021);; Molecular Function: transmembrane transporter activity (GO:0022857);; Biological Process: transmembrane transport (GO:0055085);;	K08176|5.7e-276|sind:105158458|K08176 MFS transporter, PHS family, inorganic phosphate transporter | (RefSeq) inorganic phosphate transporter 1-4-like	Inorganic ion transport and metabolism	Sugar (and other) transporter	Low affinity inorganic phosphate transporter 1 OS=Petunia hybrida OX=4102 GN=PT1 PE=2 SV=1	Inorganic ion transport and metabolism	hypothetical protein C3L33_12639, partial [Rhododendron williamsianum]
VaccDscaff1-processed-gene-115.0	2.14501	2.89628	1.9746	9.12575	9.87388	9.75627	13.7962	15.1615	15.1788	5.69397	6.07631	5.81297	5.4567	5.14635	4.8254	1.12914	1.2914	1.72128	1.96e-36	2.0587	up	1.59e-77	2.79514	up	2.3e-13	1.42284	up	1.28e-09	1.27353	up	0.0682075	-0.583458	normal	Carbohydrate transport and metabolism;; Amino acid transport and metabolism;; Inorganic ion transport and metabolism;; General function prediction only	Cellular Component: integral component of membrane (GO:0016021);; Molecular Function: transmembrane transporter activity (GO:0022857);; Biological Process: transmembrane transport (GO:0055085);;	K08176|9.7e-268|sind:105158458|K08176 MFS transporter, PHS family, inorganic phosphate transporter | (RefSeq) inorganic phosphate transporter 1-4-like	Inorganic ion transport and metabolism	Sugar (and other) transporter	Low affinity inorganic phosphate transporter 1 OS=Petunia hybrida OX=4102 GN=PT1 PE=2 SV=1	Inorganic ion transport and metabolism	hypothetical protein C3L33_12638, partial [Rhododendron williamsianum]
VaccDscaff1-processed-gene-116.42	3.49749	4.50999	4.50648	3.91749	4.07176	4.50551	4.46535	5.51557	4.06115	3.18845	2.44684	1.78516	2.07601	1.90958	2.77049	0.998387	0.743807	1.12255	0.796346	0.113963	normal	0.237136	0.342477	normal	0.0833831	-0.584643	normal	0.0259417	-0.699657	normal	7.37e-09	-1.85956	down	--	--	K00799|9.6e-37|tcc:18603221|K00799 glutathione S-transferase [EC:2.5.1.18] | (RefSeq) glutathione transferase GST 23	Posttranslational modification, protein turnover, chaperones	--	Glutathione S-transferase U8 OS=Arabidopsis thaliana OX=3702 GN=GSTU8 PE=2 SV=1	Posttranslational modification, protein turnover, chaperones	hypothetical protein C3L33_12631, partial [Rhododendron williamsianum]
VaccDscaff1-processed-gene-13.9	3.24477	3.53279	3.55998	9.25627	10.8956	9.0306	13.3173	13.4134	13.1131	11.5598	12.0278	9.66505	11.7442	9.84688	9.41175	6.87567	5.82358	5.90695	4.11e-10	1.46459	up	3.91e-23	2.06529	up	1.47e-13	1.74457	up	1.66e-11	1.68848	up	0.000588167	0.962572	normal	--	Molecular Function: molecular_function (GO:0003674);; Molecular Function: binding (GO:0005488);; Molecular Function: calcium ion binding (GO:0005509);; Cellular Component: cellular_component (GO:0005575);; Cellular Component: intracellular (GO:0005622);; Cellular Component: cell (GO:0005623);; Cellular Component: cytoplasm (GO:0005737);; Cellular Component: cytosol (GO:0005829);; Biological Proce…	K02183|8.3e-50|vvi:100263658|K02183 calmodulin | (RefSeq) calmodulin-4	Signal transduction mechanisms	EF hand	Calcium-binding protein CP1 OS=Arabidopsis thaliana OX=3702 GN=CP1 PE=2 SV=1	Signal transduction mechanisms	hypothetical protein C3L33_12998, partial [Rhododendron williamsianum]
VaccDscaff1-processed-gene-132.1	1.00327	1.05432	1.18849	0.802829	0.695477	0.837213	0.819587	0.457558	0.621294	0.613341	0.317896	0.435264	0.605944	0.32359	0.368047	0.331913	0.336405	0.323374	0.392098	-0.31165	normal	0.106346	-0.555831	normal	0.00159717	-1.0478	down	0.00238839	-1.08002	down	7.8e-07	-1.48372	down	--	Molecular Function: protein binding (GO:0005515);; Cellular Component: cellular_component (GO:0005575);; Cellular Component: intracellular (GO:0005622);; Cellular Component: cell (GO:0005623);; Cellular Component: cytoplasm (GO:0005737);; Cellular Component: cytosol (GO:0005829);; Cellular Component: plasma membrane (GO:0005886);; Biological Process: lipid metabolic process (GO:0006629);; Biologi…	K21843|0.0e+00|qsu:112015183|K21843 tetratricopeptide repeat protein 7 | (RefSeq) protein NPGR2-like isoform X1	Signal transduction mechanisms	Tetratricopeptide repeat	Protein NPGR2 OS=Arabidopsis thaliana OX=3702 GN=NPGR2 PE=1 SV=1	Signal transduction mechanisms	hypothetical protein C3L33_12594, partial [Rhododendron williamsianum]
VaccDscaff1-processed-gene-158.0	0.412346	0.409817	0.31596	1.54444	1.89293	1.66989	0.425603	0.791992	0.518596	0.335589	0.254593	0.486808	0.278254	0.141354	0.232841	0.317578	0.197708	0.330531	3.51e-10	1.89741	up	--	--	--	--	--	--	--	--	--	--	--	--	--	--	--	--	Domain of unknown function (DUF3475)	--	Function unknown	hypothetical protein C3L33_22922, partial [Rhododendron williamsianum]
VaccDscaff1-processed-gene-158.3	0.552862	0.690557	0.720047	0.711363	0.551012	1.0985	0.593357	0.869735	0.698236	0.194839	0.321606	0.369961	0.33822	0.185341	0.199973	0.005451	0.104042	0.069299	0.540861	0.322157	normal	0.478635	0.302693	normal	0.055164	-0.886477	normal	0.0199791	-1.11123	normal	1.61e-06	-2.72634	down	Signal transduction mechanisms	Molecular Function: protein kinase activity (GO:0004672);; Molecular Function: ATP binding (GO:0005524);; Cellular Component: integral component of membrane (GO:0016021);; Molecular Function: carbohydrate binding (GO:0030246);;	K01176|2.7e-73|sbi:8065370|K01176 alpha-amylase [EC:3.2.1.1] | (RefSeq) alpha-amylase isozyme 2A	--	Legume lectin domain	L-type lectin-domain containing receptor kinase IV.1 OS=Arabidopsis thaliana OX=3702 GN=LECRK41 PE=2 SV=1	Signal transduction mechanisms	L-type lectin-domain containing receptor kinase IV.1-like [Camellia sinensis]
VaccDscaff1-processed-gene-160.8	1.65381	1.34798	1.73209	1.76412	1.19038	1.53322	1.11314	1.22997	1.79462	1.54851	0.902407	0.703806	0.747996	0.472092	0.864295	0.685104	0.35175	0.448724	0.935864	0.0436383	normal	0.981833	-0.00976678	normal	0.283031	-0.423656	normal	0.00358833	-0.97382	normal	1.91e-05	-1.4428	down	--	Molecular Function: molecular_function (GO:0003674);; Molecular Function: nucleic acid binding (GO:0003676);; Molecular Function: DNA binding (GO:0003677);; Molecular Function: transcription factor activity, sequence-specific DNA binding (GO:0003700);; Molecular Function: binding (GO:0005488);; Cellular Component: cellular_component (GO:0005575);; Cellular Component: intracellular (GO:0005622);; …	K14494|7.2e-43|ppp:112296036|K14494 DELLA protein | (RefSeq) DELLA protein GAI-like	--	GRAS domain family	Scarecrow-like protein 9 OS=Arabidopsis thaliana OX=3702 GN=SCL9 PE=2 SV=1	Transcription	hypothetical protein C3L33_12499, partial [Rhododendron williamsianum]
VaccDscaff1-processed-gene-174.11	8.45914	11.9496	11.9903	6.19751	10.5406	10.1994	22.716	16.495	19.702	12.227	12.9609	14.1098	13.697	17.8525	17.5244	10.8393	11.0146	11.2905	0.837483	-0.121252	normal	0.000117455	1.00453	up	0.219627	0.388157	normal	0.0108233	0.730544	normal	0.609857	0.178575	normal	--	--	--	--	--	--	--	--
VaccDscaff1-processed-gene-175.3	4.50555	3.93584	4.13811	3.25789	3.29031	3.5063	2.83094	2.49269	2.71875	1.75464	2.51822	2.20765	2.06835	1.43936	1.86611	2.09495	2.02907	1.71704	0.456011	-0.190425	normal	0.0173672	-0.452668	normal	0.000386465	-0.798804	normal	1.81e-06	-1.04154	down	1.25e-06	-0.936764	normal	--	Molecular Function: DNA binding (GO:0003677);; Molecular Function: transcription factor activity, sequence-specific DNA binding (GO:0003700);; Cellular Component: nucleus (GO:0005634);;	K09284|1.9e-102|pop:18100239|K09284 AP2-like factor, euAP2 lineage | (RefSeq) floral homeotic protein APETALA 2 isoform X1	--	AP2 domain	APETALA2-like protein 1 OS=Oryza sativa subsp. indica OX=39946 GN=AP2-1 PE=2 SV=2	Transcription	Ethylene-responsive transcription factor RAP2-7 like [Actinidia chinensis var. chinensis]
VaccDscaff1-processed-gene-183.16	3.95626	7.5168	3.05809	5.92601	8.51442	5.48263	9.56056	9.07233	10.5931	8.71843	8.65031	8.37542	13.2906	15.9613	10.8621	9.50208	10.7174	13.3861	0.171181	0.509753	normal	3.44e-05	1.15001	up	0.00157299	0.918557	normal	3.23e-08	1.57644	up	4.86e-06	1.32304	up	--	--	--	--	--	--	--	PREDICTED: uncharacterized protein LOC108455646 [Gossypium arboreum]
VaccDscaff1-processed-gene-189.3	0.214329	0.322632	0.22005	0.185208	0.166512	0.073838	0.251395	0.624462	0.358859	2.06385	1.48904	1.89834	1.32205	1.19677	2.28967	2.01438	1.97895	1.93054	--	--	--	0.131978	0.782586	normal	1.26e-23	2.81337	up	1.33e-14	2.65305	up	3.36e-30	3.01983	up	--	Cellular Component: integral component of membrane (GO:0016021);;	K12891|4.7e-08|smo:SELMODRAFT_134332|K12891 splicing factor, arginine/serine-rich 2 | (RefSeq) hypothetical protein	--	Protein of unknown function (DUF4079)	--	Function unknown	hypothetical protein C3L33_23469, partial [Rhododendron williamsianum]
VaccDscaff1-processed-gene-196.2	0.899874	0.980587	0.983071	0.667435	0.74012	0.723215	3.83631	3.1175	3.25169	1.81167	2.20183	2.49085	1.92495	1.58953	1.98638	0.980332	0.992491	1.39204	0.656209	-0.244595	normal	9.44e-16	1.94422	up	2.51e-05	1.24557	up	0.000605868	1.05554	up	0.365141	0.370589	normal	--	Molecular Function: UDP-glycosyltransferase activity (GO:0008194);;	K13496|1.1e-164|ccav:112521128|K13496 UDP-glucosyltransferase 73C [EC:2.4.1.-] | (RefSeq) UDP-glycosyltransferase 73C5-like	Carbohydrate transport and metabolism;; Energy production and conversion	UDP-glucoronosyl and UDP-glucosyl transferase	UDP-glycosyltransferase 73C3 OS=Arabidopsis thaliana OX=3702 GN=UGT73C3 PE=2 SV=1	--	UDP-glycosyltransferase [Actinidia chinensis var. chinensis]
VaccDscaff1-processed-gene-196.4	7.94016	6.32312	7.28905	15.483	10.1334	7.90085	16.1743	19.9037	20.7475	17.0396	13.7174	15.8538	14.7502	13.6472	15.0139	6.54091	16.263	12.6379	0.0043943	0.700122	normal	2.32e-28	1.56231	up	6.04e-19	1.22663	up	4.95e-17	1.15871	up	0.00355935	0.844725	normal	--	Molecular Function: transferase activity, transferring hexosyl groups (GO:0016758);;	K13496|3.5e-166|vvi:100248767|K13496 UDP-glucosyltransferase 73C [EC:2.4.1.-] | (RefSeq) UDP-glycosyltransferase 73C2	Carbohydrate transport and metabolism;; Energy production and conversion	UDP-glucoronosyl and UDP-glucosyl transferase	UDP-glycosyltransferase 73D1 OS=Arabidopsis thaliana OX=3702 GN=UGT73D1 PE=3 SV=1	--	hypothetical protein C3L33_12368, partial [Rhododendron williamsianum]
VaccDscaff1-processed-gene-20.9	1.84852	1.62308	2.34459	2.00845	1.60696	2.21214	0.801849	0.851815	0.887274	2.28163	1.66052	2.00368	1.90368	1.6404	1.47429	4.18359	3.3117	3.28066	0.777517	0.119631	normal	0.000111212	-0.974262	normal	0.614496	0.156242	normal	0.892378	-0.0476189	normal	9.94e-07	1.02392	up	Carbohydrate transport and metabolism	Molecular Function: hydrolase activity, hydrolyzing O-glycosyl compounds (GO:0004553);; Biological Process: carbohydrate metabolic process (GO:0005975);;	K15920|6.6e-106|hbr:110662087|K15920 xylan 1,4-beta-xylosidase [EC:3.2.1.37] | (RefSeq) beta-xylosidase/alpha-L-arabinofuranosidase 2-like	--	Glycosyl hydrolase family 3 N terminal domain	Beta-D-xylosidase 1 OS=Arabidopsis thaliana OX=3702 GN=BXL1 PE=1 SV=1	Carbohydrate transport and metabolism	PREDICTED: putative beta-D-xylosidase [Nelumbo nucifera]
VaccDscaff1-processed-gene-201.5	0.237339	0.093242	0.013642	1.06416	0.536465	0.902839	1.48538	1.91492	1.45473	0.485292	0.494479	0.635709	1.0207	1.48674	1.15605	0.43655	0.633781	0.753078	--	--	--	6.81e-08	2.98052	up	--	--	--	--	--	--	--	--	--	--	--	--	--	--	--	--	Soluble scavenger receptor cysteine-rich domain-containing protein [Actinidia chinensis var. chinensis]
VaccDscaff1-processed-gene-217.8	5.10847	6.11132	5.28582	4.76018	4.26604	3.95998	3.81539	3.11595	2.64717	2.71502	2.46664	2.44145	0.459996	1.16741	0.517432	1.74981	0.751675	1.04417	0.302855	-0.212736	normal	0.0018915	-0.587888	normal	1.98e-10	-0.964582	normal	7.99e-19	-2.64733	down	4.35e-14	-1.99841	down	--	Cellular Component: plasma membrane (GO:0005886);;	--	--	--	Uncharacterized protein At5g41620 OS=Arabidopsis thaliana OX=3702 GN=At5g41620 PE=2 SV=2	--	hypothetical protein CEY00_Acc08399 [Actinidia chinensis var. chinensis]
VaccDscaff1-processed-gene-23.12	0.46247	0.359915	0.717292	1.08756	0.977676	1.56087	1.3162	0.999095	1.91762	0.776917	1.00823	1.41617	2.21425	3.36081	2.57675	6.75215	10.6499	6.32749	--	--	--	--	--	--	--	--	--	--	--	--	3.71e-11	3.53626	up	--	Molecular Function: protein phosphatase inhibitor activity (GO:0004864);; Biological Process: defense response (GO:0006952);; Biological Process: abscisic acid-activated signaling pathway (GO:0009738);; Molecular Function: abscisic acid binding (GO:0010427);; Molecular Function: signaling receptor activity (GO:0038023);;	--	--	Pathogenesis-related protein Bet v 1 family	Major pollen allergen Bet v 1-D/H OS=Betula pendula OX=3505 GN=BETV1D PE=1 SV=2	Translation, ribosomal structure and biogenesis	major allergen Pru av 1-like [Camellia sinensis]
VaccDscaff1-processed-gene-23.6	0.578379	0.95033	0.637077	0.742438	0.589823	0.700101	0.264645	0.475216	0.341733	0.301468	0.151669	0.178024	0.200585	0.187724	0.408862	0.247822	0.214439	0.222063	0.962284	0.0355746	normal	0.131978	-0.721644	normal	0.00335638	-1.40002	down	0.0253254	-1.13662	normal	0.00309316	-1.37223	down	--	Biological Process: lipid metabolic process (GO:0006629);; Biological Process: lipid catabolic process (GO:0016042);;	--	Lipid transport and metabolism;; Posttranslational modification, protein turnover, chaperones;; Signal transduction mechanisms	Lipase (class 3)	--	--	hypothetical protein C3L33_12925, partial [Rhododendron williamsianum]
VaccDscaff1-processed-gene-239.8	0.252331	0.223108	0.214151	0.361643	0.385351	0.402358	4.87715	4.6016	4.08871	2.52764	2.33954	2.24739	1.80451	2.39757	2.8861	1.71014	1.09341	1.2031	--	--	--	1.55e-54	4.23633	up	1.39e-25	3.23704	up	3.07e-21	3.27482	up	2.62e-10	2.48292	up	--	Molecular Function: regulatory region nucleic acid binding (GO:0001067);; Biological Process: response to acid chemical (GO:0001101);; Molecular Function: molecular_function (GO:0003674);; Molecular Function: nucleic acid binding (GO:0003676);; Molecular Function: DNA binding (GO:0003677);; Molecular Function: transcription factor activity, sequence-specific DNA binding (GO:0003700);; Molecular F…	K09286|4.2e-40|cpep:111803672|K09286 EREBP-like factor | (RefSeq) dehydration-responsive element-binding protein 2B-like	--	AP2 domain	Dehydration-responsive element-binding protein 2B OS=Oryza sativa subsp. japonica OX=39947 GN=DREB2B PE=2 SV=2	Transcription	hypothetical protein C3L33_12287, partial [Rhododendron williamsianum]
VaccDscaff1-processed-gene-247.3	14.6531	17.4197	14.9731	8.16262	9.28165	7.5214	2.5466	3.97912	3.24112	6.73103	4.65023	5.9845	2.96013	2.68026	2.65646	3.48395	2.47908	3.83892	9.16e-08	-0.765743	normal	3.35e-31	-2.04222	down	2.98e-16	-1.28568	down	1.2e-47	-2.30308	down	1.07e-31	-2.06991	down	--	Biological Process: regulation of cell growth (GO:0001558);; Molecular Function: DNA binding (GO:0003677);; Cellular Component: cellular_component (GO:0005575);; Cellular Component: intracellular (GO:0005622);; Cellular Component: cell (GO:0005623);; Cellular Component: nucleus (GO:0005634);; Cellular Component: nucleolus (GO:0005730);; Cellular Component: cytoskeleton (GO:0005856);; Biological P…	K01870|4.8e-09|smo:SELMODRAFT_437676|K01870 isoleucyl-tRNA synthetase [EC:6.1.1.5] | (RefSeq) hypothetical protein	--	Transcriptional repressor, ovate	Transcription repressor OFP4 OS=Arabidopsis thaliana OX=3702 GN=OFP4 PE=1 SV=1	Function unknown	hypothetical protein C3L33_12285, partial [Rhododendron williamsianum]
VaccDscaff1-processed-gene-255.5	7.58823	6.9358	6.31087	7.8132	7.70114	7.68022	5.11838	5.30543	4.96945	4.92185	4.6084	4.35069	3.55976	2.54062	4.13418	2.68262	2.8337	3.29349	0.0449157	0.274279	normal	0.0703623	-0.249101	normal	0.000914255	-0.448059	normal	4.62e-06	-0.854898	normal	1.36e-13	-1.07572	down	Cell wall/membrane/envelope biogenesis	Molecular Function: protein kinase activity (GO:0004672);; Molecular Function: ATP binding (GO:0005524);; Cellular Component: integral component of membrane (GO:0016021);;	K13435|5.3e-93|spen:107018783|K13435 serine/threonine-protein kinase Pto | (RefSeq) receptor-like protein kinase HERK 1 isoform X2	Signal transduction mechanisms	Protein tyrosine and serine/threonine kinase	Receptor-like protein kinase FERONIA OS=Arabidopsis thaliana OX=3702 GN=FER PE=1 SV=1	Signal transduction mechanisms	Receptor-like protein kinase [Actinidia chinensis var. chinensis]
VaccDscaff1-processed-gene-272.1	4.49296	4.75643	4.55103	2.33036	2.78344	2.89714	2.34303	2.27516	2.24193	1.6937	2.29938	1.68701	0.663206	1.4246	0.989534	0.610828	0.930797	0.542519	0.0049893	-0.616725	normal	4.59e-05	-0.804556	normal	2.09e-06	-1.1033	down	8.03e-11	-1.92012	down	1.69e-20	-2.4841	down	Carbohydrate transport and metabolism	Molecular Function: UDP-glycosyltransferase activity (GO:0008194);;	K13080|1.5e-131|vvi:100244875|K13080 flavanone 7-O-glucoside 2''-O-beta-L-rhamnosyltransferase [EC:2.4.1.236] | (RefSeq) flavanone 7-O-glucoside 2''-O-beta-L-rhamnosyltransferase	Carbohydrate transport and metabolism;; Energy production and conversion	UDP-glucoronosyl and UDP-glucosyl transferase	UDP-glucosyltransferase 29 OS=Panax ginseng OX=4054 GN=UGT29 PE=1 SV=1	--	Beta-D-glucosyl crocetin beta-1,6-glucosyltransferase [Actinidia chinensis var. chinensis]
VaccDscaff1-processed-gene-278.4	2.45913	2.54093	2.38014	1.70597	3.19807	2.06268	1.10194	0.949498	1.06876	1.14437	1.62646	1.49845	1.12979	1.73266	0.950232	0.608842	0.48437	0.667442	0.961511	0.0375219	normal	0.0283602	-0.948883	normal	0.211896	-0.579213	normal	0.152469	-0.706045	normal	0.000250654	-1.69771	down	--	--	--	--	--	--	--	--
VaccDscaff1-processed-gene-287.7	2.05176	2.36878	1.57473	1.71909	1.35426	1.35034	2.2045	2.63545	2.29202	3.46585	3.35352	3.08545	1.17606	0.679424	1.1523	1.21399	0.535161	0.641194	0.528519	-0.270299	normal	0.157354	0.413897	normal	0.000792373	0.824033	normal	0.0340254	-0.78222	normal	0.00666932	-1.08693	down	--	--	--	--	Plant protein of unknown function	UPF0481 protein At3g47200 OS=Arabidopsis thaliana OX=3702 GN=At3g47200 PE=2 SV=1	Function unknown	hypothetical protein C3L33_20414, partial [Rhododendron williamsianum]
VaccDscaff1-processed-gene-288.10	0.056985	0.192215	0.213192	0.126318	0.064241	0.056291	0.609144	0.441454	0.531181	0.652139	1.03261	0.931182	0.546887	0.308398	0.098288	0.15069	0.405498	0.290134	--	--	--	--	--	--	5.73e-05	2.07872	up	--	--	--	--	--	--	--	Molecular Function: UDP-glycosyltransferase activity (GO:0008194);;	K13495|6.2e-157|jre:109018092|K13495 cis-zeatin O-glucosyltransferase [EC:2.4.1.215] | (RefSeq) zeatin O-glucosyltransferase-like	Carbohydrate transport and metabolism;; Energy production and conversion	UDP-glucoronosyl and UDP-glucosyl transferase	Zeatin O-glucosyltransferase OS=Phaseolus lunatus OX=3884 GN=ZOG1 PE=2 SV=1	--	Zeatin O-glucosyltransferase [Actinidia chinensis var. chinensis]
VaccDscaff1-processed-gene-289.24	0.141184	0.274505	0.285671	0.049898	0.090328	0.176687	1.39273	1.45912	1.2694	0.741054	0.506725	0.577055	0.9945	0.721042	0.442384	1.08497	0.526426	0.69508	--	--	--	9.34e-07	2.32281	up	--	--	--	--	--	--	--	--	--	--	Molecular Function: UDP-glycosyltransferase activity (GO:0008194);;	K13495|9.5e-47|nnu:104606284|K13495 cis-zeatin O-glucosyltransferase [EC:2.4.1.215] | (RefSeq) zeatin O-glucosyltransferase-like	--	--	--	--	Zeatin O-glucosyltransferase [Actinidia chinensis var. chinensis]
VaccDscaff1-processed-gene-30.2	6.49667	4.3444	6.06881	4.40889	4.86506	5.64667	4.36	4.05962	3.69124	2.18619	2.33576	2.49607	1.40433	1.21061	0.643236	1.32541	2.16144	1.66323	0.922549	-0.0529147	normal	0.373908	-0.287035	normal	0.000253017	-1.08611	down	2.45e-08	-2.03966	down	5.17e-06	-1.49962	down	--	--	--	--	--	--	--	hypothetical protein C3L33_20027, partial [Rhododendron williamsianum]
VaccDscaff1-processed-gene-30.7	13.8493	13.3091	12.8155	12.2074	11.6154	11.6435	5.60401	6.60355	5.89415	4.37841	4.34225	4.69933	2.76271	2.65042	1.85467	3.96318	1.91999	2.79981	0.913978	-0.0445407	normal	5.21e-05	-0.928817	normal	4.54e-09	-1.3856	down	2.61e-14	-2.189	down	4.96e-11	-1.95181	down	--	Cellular Component: integral component of membrane (GO:0016021);;	--	--	--	--	--	uncharacterized protein LOC105171532 [Sesamum indicum]
VaccDscaff1-processed-gene-304.19	0.673403	0.50115	0.915967	0	0.745114	0.468421	1.69546	1.90969	1.60443	2.5015	2.77416	3.20157	2.35072	2.46322	2.23126	2.25832	3.26824	2.28436	--	--	--	--	--	--	2.34e-05	1.84776	up	0.000510483	1.66895	up	0.000121241	1.81277	up	--	--	--	Function unknown	Transport and Golgi organisation 2	--	Function unknown	transport and Golgi organization 2 homolog [Sesamum indicum]
VaccDscaff1-processed-gene-308.0	0.972293	0.44075	0.716759	0.655903	0.741371	0.903635	1.82616	1.22136	1.7296	1.1024	1.37826	1.00265	1.43723	1.81057	1.1139	1.26776	1.36551	1.62293	--	--	--	0.00677645	1.18305	up	0.148739	0.723192	normal	0.0266027	1.05948	normal	0.0219855	1.03929	normal	--	Cellular Component: ubiquitin ligase complex (GO:0000151);; Molecular Function: molecular_function (GO:0003674);; Molecular Function: binding (GO:0005488);; Molecular Function: protein binding (GO:0005515);; Cellular Component: cellular_component (GO:0005575);; Cellular Component: intracellular (GO:0005622);; Cellular Component: cell (GO:0005623);; Cellular Component: cytoplasm (GO:0005737);; Cel…	--	General function prediction only	Kelch motif	F-box/kelch-repeat protein At1g15670 OS=Arabidopsis thaliana OX=3702 GN=At1g15670 PE=2 SV=1	Function unknown	hypothetical protein C3L33_02799, partial [Rhododendron williamsianum]
VaccDscaff1-processed-gene-315.12	1.87381	2.14143	1.77554	3.56149	4.76315	4.22602	5.87728	6.01633	5.33894	5.92515	6.65311	5.30811	7.21474	5.76968	7.55073	7.04538	7.44805	6.84703	1.7e-08	1.15557	up	2.19e-24	1.72482	up	8.55e-21	1.71929	up	6.03e-27	1.95078	up	1.38e-36	2.00692	up	--	Molecular Function: molecular_function (GO:0003674);; Molecular Function: DNA binding (GO:0003677);; Molecular Function: transcription factor activity, sequence-specific DNA binding (GO:0003700);; Cellular Component: cellular_component (GO:0005575);; Cellular Component: intracellular (GO:0005622);; Cellular Component: cell (GO:0005623);; Cellular Component: nucleus (GO:0005634);; Cellular Compone…	K00521|5.7e-29|cmos:111447866|K00521 ferric-chelate reductase [EC:1.16.1.7] | (RefSeq) ferric reduction oxidase 7, chloroplastic-like	--	No apical meristem (NAM) protein	NAC domain-containing protein 87 OS=Arabidopsis thaliana OX=3702 GN=NAC087 PE=2 SV=1	Transcription	hypothetical protein C3L33_12090, partial [Rhododendron williamsianum]
VaccDscaff1-processed-gene-320.12	1.08075	1.15512	1.13496	1.16537	0.940596	0.976891	1.267	1.3049	2.03432	1.73825	1.53538	2.07394	2.32547	1.61694	1.68104	2.654	2.02348	2.12845	0.993115	-0.00686277	normal	0.131247	0.582078	normal	0.0266407	0.742714	normal	0.0142456	0.851897	normal	0.000154405	1.11844	up	--	Molecular Function: protein binding (GO:0005515);;	K04079|8.6e-30|ccaj:109800130|K04079 molecular chaperone HtpG | (RefSeq) F-box/kelch-repeat protein At3g06240-like isoform X1	--	F-box-like	F-box protein At3g07870 OS=Arabidopsis thaliana OX=3702 GN=At3g07870 PE=2 SV=1	Function unknown	hypothetical protein F0562_011388 [Nyssa sinensis]
VaccDscaff1-processed-gene-33.8	1.35672	0.96717	1.03368	2.02734	1.43911	1.65919	0.266032	0.264731	0.238386	0.192871	0.062739	0.140681	0.150114	0.015166	0.033719	0.072669	0.010655	0.019319	0.0818084	0.62363	normal	5.99e-05	-1.71467	down	2.35e-07	-2.4514	down	9.71e-08	-3.03833	down	8.92e-11	-3.66476	down	--	Cellular Component: integral component of membrane (GO:0016021);; Molecular Function: transferase activity, transferring glycosyl groups (GO:0016757);;	K08238|4.4e-208|sind:105171516|K08238 xyloglucan 6-xylosyltransferase [EC:2.4.2.39] | (RefSeq) xyloglucan 6-xylosyltransferase 2	Carbohydrate transport and metabolism;; Cell wall/membrane/envelope biogenesis	galactosyl transferase GMA12/MNN10 family	Xyloglucan 6-xylosyltransferase 2 OS=Arabidopsis thaliana OX=3702 GN=XXT2 PE=1 SV=1	--	xyloglucan 6-xylosyltransferase 2-like [Camellia sinensis]
VaccDscaff1-processed-gene-333.4	3.2725	2.45603	2.71318	6.0453	5.99793	6.85904	4.99675	4.41053	4.94093	3.38525	2.6933	2.98778	3.08429	3.52715	3.47935	2.54621	2.31866	2.76504	2.31e-06	1.16344	up	0.00107068	0.906054	normal	0.576327	0.223335	normal	0.258676	0.401409	normal	0.988111	0.00724986	normal	--	--	K19038|7.6e-57|egr:104424976|K19038 E3 ubiquitin-protein ligase ATL41 [EC:2.3.2.27] | (RefSeq) E3 ubiquitin-protein ligase ATL41	Posttranslational modification, protein turnover, chaperones	Ring finger domain	E3 ubiquitin-protein ligase ATL41 OS=Arabidopsis thaliana OX=3702 GN=ATL41 PE=1 SV=1	Posttranslational modification, protein turnover, chaperones	hypothetical protein C3L33_12032, partial [Rhododendron williamsianum]
VaccDscaff1-processed-gene-340.5	2.00013	1.61768	1.4729	1.18119	0.963942	2.11192	5.48131	5.77245	4.06909	1.83935	1.83973	1.19186	1.22493	1.36698	1.09841	0.823175	1.4628	0.953882	0.871	-0.106743	normal	6.66e-14	1.7174	up	0.880996	0.068902	normal	0.445464	-0.289456	normal	0.233329	-0.473653	normal	--	Cellular Component: integral component of membrane (GO:0016021);; Biological Process: transmembrane transport (GO:0055085);;	K15275|1.4e-171|nto:104097120|K15275 solute carrier family 35 (UDP-galactose transporter), member B1 | (RefSeq) UDP-galactose/UDP-glucose transporter 3	Carbohydrate transport and metabolism	UAA transporter family	UDP-galactose/UDP-glucose transporter 3 OS=Arabidopsis thaliana OX=3702 GN=UTR3 PE=1 SV=1	Inorganic ion transport and metabolism	hypothetical protein HYC85_015502 [Camellia sinensis]
VaccDscaff1-processed-gene-341.3	11.8693	15.7844	13.1731	11.7983	12.0712	12.6238	25.6285	23.7544	25.5302	30.7744	28.9928	25.4423	24.183	21.6552	25.632	24.5407	23.6191	27.1065	0.909153	-0.0348111	normal	1.84e-17	1.05208	up	2.92e-19	1.18189	up	1.51e-12	0.96062	normal	2.16e-15	1.03006	up	--	Cellular Component: P-body (GO:0000932);; Molecular Function: molecular_function (GO:0003674);; Molecular Function: transcription factor activity, sequence-specific DNA binding (GO:0003700);; Cellular Component: cellular_component (GO:0005575);; Cellular Component: intracellular (GO:0005622);; Cellular Component: cell (GO:0005623);; Cellular Component: nucleus (GO:0005634);; Cellular Component: c…	K23047|4.9e-120|nta:107778043|K23047 E3 ubiquitin-protein ligase UNKL [EC:2.3.2.27] | (RefSeq) zinc finger CCCH domain-containing protein 2-like	General function prediction only	Zinc finger C-x8-C-x5-C-x3-H type (and similar)	Zinc finger CCCH domain-containing protein 2 OS=Arabidopsis thaliana OX=3702 GN=TZF4 PE=1 SV=1	Function unknown	hypothetical protein C3L33_12009, partial [Rhododendron williamsianum]
VaccDscaff1-processed-gene-341.7	1.37902	1.04696	0.814502	1.42836	1.41695	1.49572	2.39125	2.66501	3.04231	2.62351	1.99347	1.77744	3.01426	2.82375	2.4056	1.50144	1.73972	1.01795	0.474112	0.402242	normal	0.000422031	1.36833	up	0.0263046	0.98241	normal	0.000509631	1.40411	up	0.375487	0.493329	normal	--	Molecular Function: molecular_function (GO:0003674);; Molecular Function: nucleic acid binding (GO:0003676);; Molecular Function: catalytic activity (GO:0003824);; Molecular Function: nuclease activity (GO:0004518);; Molecular Function: exonuclease activity (GO:0004527);; Biological Process: nucleobase-containing compound metabolic process (GO:0006139);; Biological Process: cellular aromatic comp…	K22807|6.0e-19|jre:109008439|K22807 werner syndrome-like exonuclease [EC:3.1.11.-] | (RefSeq) Werner Syndrome-like exonuclease isoform X1	General function prediction only	3'-5' exonuclease	Protein RISC-INTERACTING CLEARING 3'-5' EXORIBONUCLEASE 1 OS=Arabidopsis thaliana OX=3702 GN=RICE1 PE=1 SV=1	Replication, recombination and repair	hypothetical protein C3L33_12004, partial [Rhododendron williamsianum]
VaccDscaff1-processed-gene-346.27	1.82982	2.12373	1.76855	2.55533	3.443	2.42707	3.06992	3.86715	5.02746	5.15604	5.28201	4.62082	4.69129	4.48908	5.76156	5.44817	4.48153	5.76835	0.158634	0.562277	normal	0.000362056	1.17275	up	1.34e-07	1.45687	up	3.6e-07	1.47975	up	2.76e-08	1.55265	up	--	Molecular Function: folic acid binding (GO:0005542);; Molecular Function: transferase activity (GO:0016740);;	--	--	Formiminotransferase domain, N-terminal subdomain	--	Function unknown	hypothetical protein C3L33_11976, partial [Rhododendron williamsianum]
VaccDscaff1-processed-gene-355.6	0	0	0.20256	0.198998	0.054534	0.20684	0.689215	0.529115	1.17727	2.45659	3.52388	2.72906	2.37577	2.68394	2.12728	4.3194	4.66024	3.96944	--	--	--	--	--	--	0.0291812	1.5409	normal	0.0182697	1.93504	normal	0.00604851	2.31749	up	--	Molecular Function: zinc ion binding (GO:0008270);;	--	--	--	--	Function unknown	PREDICTED: B-box zinc finger protein 32-like [Ipomoea nil]
VaccDscaff1-processed-gene-359.3	1.33746	0.810908	0.8568	0.796207	0.243522	0.31579	0.167158	0.269166	0.333227	0.098757	0.282791	0.107948	0.063154	0.084762	0.176294	0.092111	0.05696	0.140763	0.176449	-0.686961	normal	0.000855937	-1.55848	down	7.69e-05	-2.00035	down	1.34e-06	-2.57259	down	2.18e-07	-2.72856	down	--	Molecular Function: nucleic acid binding (GO:0003676);; Molecular Function: RNA binding (GO:0003723);;	K12891|2.5e-07|aip:107607049|K12891 splicing factor, arginine/serine-rich 2 | (RefSeq) uncharacterized protein LOC107607049	--	RNA recognition motif. (a.k.a. RRM, RBD, or RNP domain)	--	--	hypothetical protein HYC85_029676 [Camellia sinensis]
VaccDscaff1-processed-gene-365.21	1.73643	2.09491	1.69134	1.07148	1.01057	1.00239	0.588428	0.622391	0.558043	0.629489	0.70242	0.661594	0.514301	0.615639	0.494531	0.587726	0.633865	0.565945	7.31e-05	-0.685212	normal	1.54e-15	-1.42785	down	8.12e-13	-1.30787	down	6.52e-15	-1.57147	down	1.5e-15	-1.45298	down	Transcription	Molecular Function: ADP binding (GO:0043531);;	K13459|1.5e-124|vvi:104880791|K13459 disease resistance protein RPS2 | (RefSeq) probable disease resistance protein At4g27220	Signal transduction mechanisms	NB-ARC domain	Probable disease resistance protein At4g27220 OS=Arabidopsis thaliana OX=3702 GN=At4g27220 PE=2 SV=1	Signal transduction mechanisms	hypothetical protein HYC85_011332 [Camellia sinensis]
VaccDscaff1-processed-gene-37.17	11.5606	12.0464	10.9894	4.70063	5.03882	6.41594	2.58289	2.93128	0.975644	1.88427	2.32252	2.69482	0.892145	1.15155	0.75578	0.938649	1.27512	1.1326	1.5e-09	-0.934963	normal	6.14e-13	-2.11474	down	1.62e-36	-2.15006	down	4.53e-68	-3.39136	down	9.2e-75	-3.17448	down	Secondary metabolites biosynthesis, transport and catabolism	Molecular Function: molecular_function (GO:0003674);; Molecular Function: catalytic activity (GO:0003824);; Biological Process: multicellular organism development (GO:0007275);; Biological Process: aging (GO:0007568);; Biological Process: biological_process (GO:0008150);; Biological Process: metabolic process (GO:0008152);; Biological Process: leaf senescence (GO:0010150);; Molecular Function: ox…	K05658|3.1e-79|cpep:111781709|K05658 ATP-binding cassette, subfamily B (MDR/TAP), member 1 [EC:7.6.2.2] | (RefSeq) uncharacterized protein LOC111781709	Secondary metabolites biosynthesis, transport and catabolism;; General function prediction only	non-haem dioxygenase in morphine synthesis N-terminal	Protein SRG1 OS=Arabidopsis thaliana OX=3702 GN=SRG1 PE=2 SV=1	Secondary metabolites biosynthesis, transport and catabolism	hypothetical protein C3L33_12865, partial [Rhododendron williamsianum]
VaccDscaff1-processed-gene-380.1	2.19272	2.05249	1.73384	1.82225	1.77624	2.59953	3.30892	2.62662	2.56927	1.76212	3.33299	2.65499	3.1898	2.8049	3.64383	4.2991	3.019	3.99815	0.750478	0.160667	normal	0.0161817	0.670537	normal	0.2015	0.481685	normal	0.00205689	0.821241	normal	4.38e-05	1.04753	up	--	Molecular Function: protein binding (GO:0005515);;	--	--	F-box domain	--	Function unknown	hypothetical protein C3L33_13130, partial [Rhododendron williamsianum]
VaccDscaff1-processed-gene-385.3	0.247817	0.170167	0.30643	1.35283	1.53099	1.15525	1.05335	0.857272	0.80192	0.119884	0.179886	0.248456	0.142297	0.041545	0.033498	0.032144	0.061769	0.09898	1.92e-13	2.1781	up	1.07e-07	1.9312	up	--	--	--	--	--	--	--	--	--	Signal transduction mechanisms	Molecular Function: protein serine/threonine kinase activity (GO:0004674);; Molecular Function: ATP binding (GO:0005524);; Cellular Component: integral component of membrane (GO:0016021);; Molecular Function: carbohydrate binding (GO:0030246);;	K13417|1.1e-58|brp:103860383|K13417 somatic embryogenesis receptor kinase 4 [EC:2.7.10.1 2.7.11.1] | (RefSeq) LRRII4; somatic embryogenesis receptor kinase 4 isoform X1	--	Protein kinase domain	G-type lectin S-receptor-like serine/threonine-protein kinase At5g35370 OS=Arabidopsis thaliana OX=3702 GN=At5g35370 PE=2 SV=2	Signal transduction mechanisms	G-type lectin S-receptor-like serine/threonine-protein kinase At5g35370 [Camellia sinensis]
VaccDscaff1-processed-gene-387.6	7.86895	10.1042	10.3751	9.22983	6.82903	7.67616	2.84043	3.39595	4.02335	3.91813	4.47811	3.98498	1.94858	1.11817	1.9549	1.73842	2.50641	1.3555	0.676734	-0.124893	normal	2.78e-11	-1.25562	down	3.46e-09	-1.04049	down	2.51e-23	-2.27128	down	1.08e-19	-2.13692	down	--	Molecular Function: molecular_function (GO:0003674);; Molecular Function: nucleic acid binding (GO:0003676);; Molecular Function: DNA binding (GO:0003677);; Molecular Function: transcription factor activity, sequence-specific DNA binding (GO:0003700);; Molecular Function: binding (GO:0005488);; Cellular Component: cellular_component (GO:0005575);; Cellular Component: intracellular (GO:0005622);; …	K14494|1.5e-63|hbr:110671412|K14494 DELLA protein | (RefSeq) DELLA protein GAI	--	GRAS domain family	Scarecrow-like transcription factor PAT1 OS=Arabidopsis thaliana OX=3702 GN=PAT1 PE=1 SV=1	Transcription	hypothetical protein C3L33_11794, partial [Rhododendron williamsianum]
VaccDscaff1-processed-gene-389.11	7.83271	10.0241	7.57246	5.55057	4.45282	4.34263	3.03501	3.49996	3.24013	5.36013	3.71783	4.2346	2.5557	1.58989	2.96977	4.04784	3.46307	3.70026	8e-07	-0.679212	normal	2.3e-22	-1.18153	down	7.03e-08	-0.791791	normal	1.1e-17	-1.64891	down	1.36e-16	-1.0189	down	Signal transduction mechanisms	Molecular Function: phosphorelay sensor kinase activity (GO:0000155);; Cellular Component: integral component of membrane (GO:0016021);;	K14489|0.0e+00|vvi:100263145|K14489 arabidopsis histidine kinase 2/3/4 (cytokinin receptor) [EC:2.7.13.3] | (RefSeq) CYT1; histidine kinase 2	Signal transduction mechanisms	Histidine kinase-, DNA gyrase B-, and HSP90-like ATPase	Histidine kinase 2 OS=Arabidopsis thaliana OX=3702 GN=AHK2 PE=1 SV=1	Signal transduction mechanisms	Histidine kinase [Actinidia chinensis var. chinensis]
VaccDscaff1-processed-gene-396.17	5.606	4.80708	5.37373	5.49735	6.84855	5.38202	4.4851	4.78116	3.87795	2.31028	2.49485	2.72885	1.8585	1.06619	1.00651	1.57386	2.87891	2.59472	0.584564	0.251053	normal	0.861238	-0.0782444	normal	0.021395	-0.864656	normal	0.000176363	-1.63602	down	0.0215851	-0.949802	normal	--	Biological Process: metabolic process (GO:0008152);; Molecular Function: glucan endo-1,3-beta-D-glucosidase activity (GO:0042973);;	K19891|5.8e-16|smo:SELMODRAFT_231287|K19891 glucan endo-1,3-beta-glucosidase 1/2/3 [EC:3.2.1.39] | (RefSeq) hypothetical protein	--	X8 domain	Glucan endo-1,3-beta-glucosidase OS=Triticum aestivum OX=4565 GN=GLC1 PE=2 SV=1	Function unknown	glucan endo-1,3-beta-D-glucosidase [Camellia sinensis]
VaccDscaff1-processed-gene-400.0	2.13133	1.76716	1.22856	1.29596	1.42407	1.58919	1.53632	1.35284	1.44213	0.436137	0.484663	0.416843	0.341196	0.296932	0.456094	0.16001	0.168308	0.128879	0.797538	-0.113637	normal	0.868377	-0.0565208	normal	5.35e-10	-1.70479	down	4.33e-11	-1.96982	down	6e-23	-3.14367	down	--	Molecular Function: protein binding (GO:0005515);; Biological Process: biological_process (GO:0008150);; Biological Process: tissue development (GO:0009888);; Biological Process: meristem maintenance (GO:0010073);; Biological Process: multicellular organismal process (GO:0032501);; Biological Process: developmental process (GO:0032502);; Biological Process: meristem development (GO:0048507);; Bio…	K13466|5.4e-21|cic:CICLE_v10007014mg|K13466 EIX receptor 1/2 | (RefSeq) hypothetical protein	General function prediction only	Leucine rich repeat	Receptor-like protein 7 OS=Arabidopsis thaliana OX=3702 GN=RLP7 PE=3 SV=2	Signal transduction mechanisms	uncharacterized protein LOC110750664 [Prunus avium]
VaccDscaff1-processed-gene-400.3	3.13852	2.63034	2.42974	3.77355	3.99544	3.85306	3.46613	3.4681	4.01302	1.72377	1.66082	1.32115	0.920384	0.829658	1.11969	0.522449	0.609046	0.675951	3.33e-06	0.612052	normal	1.65e-05	0.594849	normal	0.000127644	-0.654726	normal	1.06e-14	-1.33727	down	2.81e-30	-1.99817	down	--	Cellular Component: integral component of membrane (GO:0016021);;	K13466|3.3e-13|dzi:111309432|K13466 EIX receptor 1/2 | (RefSeq) probable LRR receptor-like serine/threonine-protein kinase At4g36180	General function prediction only	Leucine rich repeat	Receptor-like protein 7 OS=Arabidopsis thaliana OX=3702 GN=RLP7 PE=3 SV=2	Signal transduction mechanisms	uncharacterized protein LOC110750664 [Prunus avium]
VaccDscaff1-processed-gene-401.16	1.33383	1.19582	1.04197	2.14151	1.8168	2.34992	2.46165	2.51267	2.49347	1.17135	1.20299	0.731687	0.702338	0.928293	0.77736	0.627098	0.241628	0.402856	0.000171177	0.872687	normal	1.52e-09	1.21768	up	0.905981	-0.0539849	normal	0.256575	-0.388464	normal	0.00150489	-1.23922	down	--	Molecular Function: protein binding (GO:0005515);; Cellular Component: integral component of membrane (GO:0016021);;	K13466|5.2e-15|cic:CICLE_v10007014mg|K13466 EIX receptor 1/2 | (RefSeq) hypothetical protein	General function prediction only	Leucine rich repeat	Receptor-like protein 9DC3 OS=Solanum pimpinellifolium OX=4084 GN=9DC3 PE=3 SV=1	Chromatin structure and dynamics	receptor-like protein 7 [Camellia sinensis]
VaccDscaff1-processed-gene-405.22	0.431799	0.547972	0.490307	0.914439	0.803211	0.342335	0.900839	0.874355	0.851761	1.74239	2.20727	1.49913	1.73703	1.18296	1.35974	1.44248	1.0311	0.404511	--	--	--	0.0296996	0.932334	normal	1.37e-07	1.8595	up	5.06e-05	1.5851	up	--	--	--	--	Molecular Function: molecular_function (GO:0003674);; Molecular Function: transcription factor activity, sequence-specific DNA binding (GO:0003700);; Biological Process: regulation of transcription, DNA-templated (GO:0006355);; Biological Process: biological_process (GO:0008150);; Biological Process: regulation of biosynthetic process (GO:0009889);; Biological Process: regulation of gene expressi…	K08065|7.4e-56|mesc:110627444|K08065 nuclear transcription Y subunit beta | (RefSeq) nuclear transcription factor Y subunit B-3	Transcription	Histone-like transcription factor (CBF/NF-Y) and archaeal histone	Nuclear transcription factor Y subunit B-3 OS=Arabidopsis thaliana OX=3702 GN=NFYB3 PE=1 SV=1	Chromatin structure and dynamics	hypothetical protein HYC85_011857 [Camellia sinensis]
VaccDscaff1-processed-gene-408.22	1.79281	2.32939	1.51689	1.58094	1.93646	1.71402	1.4071	1.08015	1.42654	1.05267	0.461013	1.05405	0.316166	0.557406	0.182358	0.553148	0.507222	0.469687	0.9793	0.014968	normal	0.278547	-0.329472	normal	0.0082054	-0.938643	normal	8.97e-08	-2.0704	down	5.59e-09	-1.66616	down	--	--	K06636|7.2e-21|ppp:112291699|K06636 structural maintenance of chromosome 1 | (RefSeq) structural maintenance of chromosomes protein 2-2-like	--	Plant protein of unknown function (DUF641)	Protein GRAVITROPIC IN THE LIGHT 1 OS=Arabidopsis thaliana OX=3702 GN=GIL1 PE=1 SV=1	Function unknown	hypothetical protein C3L33_11741, partial [Rhododendron williamsianum]
VaccDscaff1-processed-gene-409.1	2.93873	3.91675	3.75433	4.77556	6.09938	5.24411	15.7877	15.1706	13.4147	23.6148	19.7371	18.557	17.8966	24.2746	19.418	12.8675	16.3257	15.4338	0.19294	0.579013	normal	7.55e-14	2.13022	up	4.37e-22	2.54422	up	1.28e-19	2.58385	up	6.6e-13	2.1321	up	--	--	--	--	--	--	--	uncharacterized protein LOC7464577 [Populus trichocarpa]
VaccDscaff1-processed-gene-409.8	20.0539	32.1301	29.2941	20.6352	20.7857	19.4119	12.3553	14.0498	13.4666	14.6981	14.6217	14.3527	9.86528	9.59771	9.60549	11.2652	10.8488	12.6129	0.128047	-0.286285	normal	3.31e-08	-0.835437	normal	8.79e-07	-0.755329	normal	2.7e-17	-1.30949	down	5.62e-12	-1.06536	down	Energy production and conversion	Biological Process: tricarboxylic acid cycle (GO:0006099);; Molecular Function: phosphoenolpyruvate carboxylase activity (GO:0008964);; Biological Process: carbon fixation (GO:0015977);;	K01595|0.0e+00|oeu:111391584|K01595 phosphoenolpyruvate carboxylase [EC:4.1.1.31] | (RefSeq) phosphoenolpyruvate carboxylase isoform X1	--	Phosphoenolpyruvate carboxylase	Phosphoenolpyruvate carboxylase 2 OS=Flaveria trinervia OX=4227 GN=PPCC PE=1 SV=1	Energy production and conversion	phosphoenolpyruvate carboxylase [Vaccinium corymbosum]
VaccDscaff1-processed-gene-422.13	2.80701	1.92567	2.49929	1.88942	1.45529	2.74197	4.89813	5.27603	5.62574	2.10843	2.8244	1.6058	1.83782	0.956263	1.17702	0.062255	0.827279	0.561981	0.910513	-0.0890316	normal	0.000516906	1.21206	up	0.974752	-0.0232225	normal	--	--	--	--	--	--	--	--	--	--	--	--	--	--
VaccDscaff1-processed-gene-426.24	6.77462	8.9475	8.06441	7.50457	7.70152	6.39819	4.15201	4.63743	4.22172	4.63233	3.77153	4.3091	3.13017	3.08493	3.35345	3.80603	3.85963	3.46882	0.970984	-0.0122484	normal	1.61e-06	-0.676252	normal	1.75e-07	-0.76111	normal	9.4e-15	-1.13803	down	6.53e-11	-0.932746	normal	Lipid transport and metabolism	Molecular Function: lanosterol synthase activity (GO:0000250);; Cellular Component: lipid droplet (GO:0005811);; Biological Process: triterpenoid biosynthetic process (GO:0016104);; Molecular Function: beta-amyrin synthase activity (GO:0042300);;	K01853|0.0e+00|vvi:100243389|K01853 cycloartenol synthase [EC:5.4.99.8] | (RefSeq) cycloartenol Synthase	Lipid transport and metabolism	Squalene-hopene cyclase C-terminal domain	Cycloartenol Synthase OS=Panax ginseng OX=4054 GN=OSCPNX1 PE=1 SV=1	Lipid transport and metabolism	Cycloartenol Synthase [Actinidia chinensis var. chinensis]
VaccDscaff1-processed-gene-432.11	5.17615	5.25873	4.89123	7.31529	7.62471	7.27269	1.45516	1.74484	1.86538	1.11535	1.01128	1.01232	1.01543	0.793292	0.77542	0.409608	0.411577	0.492739	2.32e-06	0.641482	normal	7.31e-14	-1.38402	down	7e-28	-2.0966	down	4.5e-26	-2.32969	down	4.88e-45	-3.27998	down	--	--	K14494|1.1e-59|pper:18769184|K14494 DELLA protein | (RefSeq) DELLA protein DWARF8	--	GRAS domain family	Chitin-inducible gibberellin-responsive protein 1 OS=Oryza sativa subsp. japonica OX=39947 GN=CIGR1 PE=2 SV=1	Transcription	hypothetical protein HYC85_014719 [Camellia sinensis]
VaccDscaff1-processed-gene-439.21	1.05333	1.63106	0.664923	1.11448	0.725313	0.896914	3.59689	5.10285	3.9118	1.43495	3.40279	2.49406	1.52775	0.853009	0.649465	4.05551	1.3803	2.34524	--	--	--	5.97e-05	1.81317	up	--	--	--	--	--	--	--	--	--	--	--	--	--	--	--	--	hypothetical protein C3L33_11583, partial [Rhododendron williamsianum]
VaccDscaff1-processed-gene-446.7	16.3119	20.9843	16.7453	14.051	12.3738	14.2453	11.4836	12.7203	12.5632	8.7921	8.12018	8.6477	6.44436	5.13286	7.44419	9.21558	6.96824	8.6651	0.101453	-0.274831	normal	0.00970878	-0.366318	normal	8.01e-12	-0.934727	normal	2.5e-15	-1.32795	down	8.03e-10	-0.954686	normal	--	--	K00895|4.9e-09|dct:110098534|K00895 diphosphate-dependent phosphofructokinase [EC:2.7.1.90] | (RefSeq) pyrophosphate--fructose 6-phosphate 1-phosphotransferase subunit alpha-like	--	C2 domain	Protein SRC2 OS=Glycine max OX=3847 GN=SRC2 PE=2 SV=1	Function unknown	hypothetical protein C3L33_11542, partial [Rhododendron williamsianum]
VaccDscaff1-processed-gene-448.13	19.4978	16.4487	21.3472	17.1572	31.556	21.2694	64.7414	37.4991	83.028	60.1099	36.0558	72.8752	63.8719	45.0224	42.6216	58.5904	52.9758	42.8145	0.158994	0.383667	normal	5.81e-07	1.74627	up	9.51e-16	1.64082	up	1.51e-18	1.54196	up	4.19e-27	1.56643	up	Amino acid transport and metabolism	Cellular Component: cytoplasm (GO:0005737);; Biological Process: cysteine biosynthetic process from serine (GO:0006535);; Molecular Function: serine O-acetyltransferase activity (GO:0009001);;	K00640|1.9e-128|zju:107403319|K00640 serine O-acetyltransferase [EC:2.3.1.30] | (RefSeq) serine acetyltransferase 1, chloroplastic	Amino acid transport and metabolism	Serine acetyltransferase, N-terminal	Serine acetyltransferase 3, mitochondrial OS=Arabidopsis thaliana OX=3702 GN=SAT3 PE=1 SV=3	Amino acid transport and metabolism	hypothetical protein F0562_008724 [Nyssa sinensis]
VaccDscaff1-processed-gene-448.30	1.86851	1.80041	5.38058	4.92902	11.1109	8.31944	48.788	40.1349	34.4732	14.1409	1.89888	35.9863	33.5373	47.1352	7.58627	3.7059	1.42943	16.5664	0.0671143	0.913851	normal	1.09e-11	3.32573	up	0.052179	1.42384	normal	0.000341012	2.49841	up	0.29309	0.936902	normal	Amino acid transport and metabolism	Cellular Component: cytoplasm (GO:0005737);; Biological Process: cysteine biosynthetic process from serine (GO:0006535);; Molecular Function: serine O-acetyltransferase activity (GO:0009001);;	K00640|7.6e-119|vvi:100246391|K00640 serine O-acetyltransferase [EC:2.3.1.30] | (RefSeq) SERAT; serine acetyltransferase 1, chloroplastic	Amino acid transport and metabolism	Serine acetyltransferase, N-terminal	Serine acetyltransferase 1, chloroplastic OS=Arabidopsis thaliana OX=3702 GN=SAT1 PE=1 SV=2	Amino acid transport and metabolism	hypothetical protein F0562_008724 [Nyssa sinensis]
VaccDscaff1-processed-gene-450.5	0.805105	0.838793	0.652905	0.654878	0.377352	0.458728	0.44676	0.25862	0.53472	0.248032	0.201978	0.200296	0.183636	0.108862	0.060872	0.098954	0.136564	0.100394	0.350728	-0.412045	normal	0.116529	-0.643529	normal	1.84e-05	-1.54414	down	7.23e-07	-2.22257	down	2.62e-09	-2.41901	down	Signal transduction mechanisms	Molecular Function: protein kinase activity (GO:0004672);; Molecular Function: ATP binding (GO:0005524);; Cellular Component: integral component of membrane (GO:0016021);; Molecular Function: carbohydrate binding (GO:0030246);;	K22133|1.6e-73|egr:104443802|K22133 oxalate---CoA ligase [EC:6.2.1.8] | (RefSeq) oxalate--CoA ligase	--	Legume lectin domain	Probable L-type lectin-domain containing receptor kinase S.7 OS=Arabidopsis thaliana OX=3702 GN=LECRKS7 PE=2 SV=1	Signal transduction mechanisms	probable L-type lectin-domain containing receptor kinase S.7 [Camellia sinensis]
VaccDscaff1-processed-gene-457.0	0.324752	0.377465	0.396216	0.207838	0.203349	0.143615	0.052411	0.077554	0.093618	0.164698	0.111684	0.101227	0.16646	0.121016	0.181387	0.180519	0.145723	0.153741	0.0733068	-0.703497	normal	5.47e-06	-1.86395	down	0.001526	-1.25548	down	0.015265	-0.981145	normal	0.0109121	-0.969022	normal	--	Molecular Function: ADP binding (GO:0043531);;	K13459|2.0e-113|vvi:104880791|K13459 disease resistance protein RPS2 | (RefSeq) probable disease resistance protein At4g27220	Signal transduction mechanisms	NB-ARC domain	Disease resistance protein At4g27190 OS=Arabidopsis thaliana OX=3702 GN=At4g27190 PE=2 SV=1	Signal transduction mechanisms	disease resistance protein RPS2-like [Camellia sinensis]
VaccDscaff1-processed-gene-458.0	1.68907	1.14251	1.57592	2.48489	3.83673	4.64407	2.94567	2.50795	1.27435	2.25068	1.48408	2.97164	1.65088	1.24857	2.58099	1.84364	1.20385	1.68994	0.00641076	1.08032	up	--	--	--	--	--	--	--	--	--	--	--	--	Posttranslational modification, protein turnover, chaperones	Cellular Component: cellular_component (GO:0005575);; Cellular Component: intracellular (GO:0005622);; Cellular Component: cell (GO:0005623);; Cellular Component: nucleus (GO:0005634);; Cellular Component: cytoplasm (GO:0005737);; Cellular Component: chloroplast (GO:0009507);; Cellular Component: plastid (GO:0009536);; Cellular Component: organelle (GO:0043226);; Cellular Component: membrane-boun…	K03686|7.3e-08|sind:105165743|K03686 molecular chaperone DnaJ | (RefSeq) uncharacterized protein LOC105165743 isoform X1	Posttranslational modification, protein turnover, chaperones	DnaJ domain	Chaperone protein dnaJ 11, chloroplastic OS=Arabidopsis thaliana OX=3702 GN=ATJ11 PE=1 SV=2	Posttranslational modification, protein turnover, chaperones	hypothetical protein HYC85_011617 [Camellia sinensis]
VaccDscaff1-processed-gene-459.15	6.64443	5.24491	5.39426	15.6171	13.4321	14.3808	9.29547	9.24338	7.84124	8.60578	8.94529	9.58899	5.39822	6.20257	7.3677	7.40522	4.58161	7.62253	5.42e-08	1.31218	up	0.0140001	0.751258	normal	0.0159119	0.737506	normal	0.512742	0.268796	normal	0.43898	0.321151	normal	--	--	--	--	--	--	--	--
VaccDscaff1-processed-gene-459.9	0.300263	0.290563	0.325729	0.248161	0.344236	0.16625	0.405868	0.343555	0.650395	1.38066	1.14781	1.80089	0.976119	1.53162	1.01822	1.22647	1.92216	1.4421	--	--	--	--	--	--	6.96e-08	2.09161	up	1.79e-05	1.87887	up	1.11e-08	2.26107	up	--	Molecular Function: transferase activity, transferring hexosyl groups (GO:0016758);;	K08237|5.1e-185|nsy:104233921|K08237 hydroquinone glucosyltransferase [EC:2.4.1.218] | (RefSeq) hydroquinone glucosyltransferase-like	Carbohydrate transport and metabolism;; Energy production and conversion	UDP-glucoronosyl and UDP-glucosyl transferase	Hydroquinone glucosyltransferase OS=Rauvolfia serpentina OX=4060 GN=AS PE=1 SV=1	--	hypothetical protein C3L33_22757, partial [Rhododendron williamsianum]
VaccDscaff1-processed-gene-461.22	1.76727	2.22505	2.49302	3.36139	2.5626	3.60501	4.4372	3.78904	4.25941	5.43852	3.71109	3.91005	3.27651	2.67773	4.0981	3.90136	1.96207	3.94494	0.0362795	0.619631	normal	2.83e-06	1.1019	up	1.86e-05	1.09933	up	0.00840131	0.763479	normal	0.0393556	0.721791	normal	--	--	--	--	--	--	--	hypothetical protein C3L33_11461, partial [Rhododendron williamsianum]
VaccDscaff1-processed-gene-6.15	3.54022	3.55921	4.25857	8.97897	7.61563	7.63091	12.2054	14.6896	13.3918	13.7284	11.991	13.8772	12.1045	13.863	13.5889	13.5025	12.6278	13.9805	1.61e-14	1.17292	up	2.39e-48	1.99035	up	1.35e-46	1.91167	up	4.83e-43	1.94406	up	1.13e-51	1.96171	up	Signal transduction mechanisms	Molecular Function: catalytic activity (GO:0003824);;	K14803|2.0e-123|jre:108999793|K14803 protein phosphatase PTC2/3 [EC:3.1.3.16] | (RefSeq) probable protein phosphatase 2C 13	Signal transduction mechanisms	Protein phosphatase 2C	Probable protein phosphatase 2C 13 OS=Arabidopsis thaliana OX=3702 GN=At1g48040 PE=2 SV=2	Signal transduction mechanisms	hypothetical protein C3L33_13035, partial [Rhododendron williamsianum]
VaccDscaff1-processed-gene-62.15	2.68387	3.42959	2.57128	1.58293	1.20774	1.3636	1.20295	2.12716	1.57015	1.26226	1.06927	0.694106	1.25437	0.887043	0.958367	1.05045	0.713519	0.951133	0.0360318	-0.773463	normal	0.150923	-0.58704	normal	0.00182569	-1.23233	down	0.00214842	-1.2235	down	0.00026891	-1.4102	down	--	--	--	--	--	--	--	--
VaccDscaff1-processed-gene-77.23	0.658212	0.812982	1.51208	0.304938	0.835544	0.917101	2.40028	2.44712	2.92979	3.46886	3.06967	2.95159	1.35472	1.91605	0.939703	0.526374	0.868053	0.833743	--	--	--	0.00641112	1.34243	up	0.000748415	1.55253	up	--	--	--	--	--	--	--	--	--	--	--	--	--	--
VaccDscaff1-processed-gene-79.18	4.07043	4.30115	3.69389	3.25654	2.65413	2.17607	1.23931	1.89751	1.17152	3.25724	2.29912	2.37639	1.26406	1.27194	1.88889	2.4112	2.64884	2.06176	0.106211	-0.420528	normal	3.06e-07	-1.25501	down	0.0446462	-0.458944	normal	1.32e-07	-1.25569	down	0.00410504	-0.59673	normal	--	--	K02930|1.3e-06|vvi:100253424|K02930 large subunit ribosomal protein L4e | (RefSeq) 60S ribosomal protein L4-like	--	zinc-finger of the FCS-type, C2-C2	FCS-Like Zinc finger 8 OS=Arabidopsis thaliana OX=3702 GN=FLZ8 PE=1 SV=1	Function unknown	hypothetical protein F0562_034983 [Nyssa sinensis]
VaccDscaff1-processed-gene-8.0	1.9298	2.41514	3.10577	6.46739	6.12639	7.91097	7.38579	8.99052	7.21024	4.14027	3.97376	3.75366	4.68241	4.36136	4.05508	2.20366	1.84669	2.53966	5.79e-12	1.46837	up	6.9e-18	1.80152	up	0.00170727	0.780474	normal	0.000121505	0.956144	normal	0.968522	-0.0164861	normal	--	Molecular Function: DNA binding (GO:0003677);;	K09422|5.1e-107|tcc:18603713|K09422 transcription factor MYB, plant | (RefSeq) transcription factor MYB108	Transcription	Myb-like DNA-binding domain	Transcription factor MYB108 OS=Arabidopsis thaliana OX=3702 GN=MYB108 PE=1 SV=1	--	hypothetical protein F0562_034948 [Nyssa sinensis]
VaccDscaff1-processed-gene-81.4	5.1507	5.03835	4.77863	2.16868	2.21641	2.30866	1.76768	2.0287	1.86379	4.09842	3.41144	3.08662	2.72471	2.6488	3.38682	3.48109	3.07519	3.35529	3.25e-24	-1.01826	down	6.62e-30	-1.20996	down	0.00562923	-0.362571	normal	1.11e-06	-0.610085	normal	1.35e-05	-0.437565	normal	--	Molecular Function: molecular_function (GO:0003674);; Molecular Function: actin binding (GO:0003779);; Molecular Function: binding (GO:0005488);; Molecular Function: protein binding (GO:0005515);; Cellular Component: cellular_component (GO:0005575);; Cellular Component: intracellular (GO:0005622);; Cellular Component: cell (GO:0005623);; Cellular Component: nucleus (GO:0005634);; Cellular Compone…	--	--	KIP1-like protein	Protein NETWORKED 1A OS=Arabidopsis thaliana OX=3702 GN=NET1A PE=1 SV=1	Function unknown	hypothetical protein C3L33_12715, partial [Rhododendron williamsianum]
VaccDscaff1-processed-gene-84.13	0.173197	0.432374	0.417848	0.628736	0.653361	0.79839	0.73988	0.875698	0.865635	0.488695	0.337512	0.394525	0.183237	0.582203	0.282489	0.300687	0.300749	0.341415	0.110367	0.776695	normal	0.00876048	1.26405	up	--	--	--	--	--	--	--	--	--	--	Molecular Function: molecular_function (GO:0003674);; Molecular Function: catalytic activity (GO:0003824);; Molecular Function: ubiquitin-protein transferase activity (GO:0004842);; Cellular Component: cellular_component (GO:0005575);; Cellular Component: intracellular (GO:0005622);; Cellular Component: cell (GO:0005623);; Cellular Component: cytoplasm (GO:0005737);; Biological Process: cellular …	K10268|1.7e-66|lang:109342476|K10268 F-box and leucine-rich repeat protein 2/20 | (RefSeq) F-box protein SKIP2-like	General function prediction only	Auxin responsive protein	F-box protein At1g47056 OS=Arabidopsis thaliana OX=3702 GN=At1g47056 PE=2 SV=1	Function unknown	hypothetical protein C3L33_01266, partial [Rhododendron williamsianum]
VaccDscaff1-processed-gene-90.8	5.11655	3.8412	4.68003	3.80178	3.33327	3.68376	2.84519	3.18686	3.05491	2.75156	2.43326	3.22727	1.1831	2.17448	2.20615	2.52752	1.69123	2.6238	0.401996	-0.201569	normal	0.0268139	-0.396806	normal	0.00388015	-0.557231	normal	1.14e-05	-1.1067	down	0.000112414	-0.825395	normal	Amino acid transport and metabolism	Molecular Function: serine-type endopeptidase activity (GO:0004252);; Cellular Component: nucleus (GO:0005634);; Cellular Component: vacuole (GO:0005773);; Cellular Component: chloroplast (GO:0009507);; Biological Process: protein homotetramerization (GO:0051289);; Molecular Function: serine-type aminopeptidase activity (GO:0070009);;	K01303|2.2e-130|qsu:112001064|K01303 acylaminoacyl-peptidase [EC:3.4.19.1] | (RefSeq) acylamino-acid-releasing enzyme isoform X1	Posttranslational modification, protein turnover, chaperones	Prolyl oligopeptidase family	Acylamino-acid-releasing enzyme OS=Arabidopsis thaliana OX=3702 GN=AARE PE=1 SV=1	Posttranslational modification, protein turnover, chaperones	hypothetical protein HYC85_003374 [Camellia sinensis]
VaccDscaff1-processed-gene-93.7	1.39555	1.94749	2.10035	2.46996	2.3382	2.68499	4.20439	3.72009	3.36201	2.27539	2.81249	3.2397	3.18919	2.81043	2.6873	2.38182	1.77893	1.38015	0.325135	0.476273	normal	0.00180912	1.15311	up	0.126855	0.681898	normal	0.0680411	0.788471	normal	0.770113	0.175605	normal	--	Cellular Component: integral component of membrane (GO:0016021);;	K20359|2.0e-38|cic:CICLE_v10005568mg|K20359 PRA1 family protein 1 | (RefSeq) hypothetical protein	Intracellular trafficking, secretion, and vesicular transport	PRA1 family protein	PRA1 family protein D OS=Arabidopsis thaliana OX=3702 GN=PRA1D PE=1 SV=1	Intracellular trafficking, secretion, and vesicular transport	PRA1 family protein [Actinidia chinensis var. chinensis]
VaccDscaff1-snap-gene-1.29	0.697254	1.24015	0.798329	0.479658	0.390314	0.383509	0.35789	0.092298	0.326027	0.073205	0.143846	0.333748	0.810924	0.21569	0.424746	0.402764	0.65169	0.316533	0.0396369	-0.796343	normal	0.00465227	-1.39003	down	0.000294282	-1.79643	down	0.229045	-0.659288	normal	0.0822565	-0.782374	normal	Cell cycle control, cell division, chromosome partitioning	Molecular Function: metal ion binding (GO:0046872);;	K01081|4.9e-39|ota:OT_ostta11g02900|K01081 5'-nucleotidase [EC:3.1.3.5] | (RefSeq) HAD-superfamily hydrolase, subfamily IG,5'-nucleotidase	Nucleotide transport and metabolism	5' nucleotidase family	--	Nucleotide transport and metabolism	Cytosolic purine 5'-nucleotidase [Actinidia chinensis var. chinensis]
VaccDscaff1-snap-gene-1.32	4.33005	3.78017	3.87984	4.82555	3.90812	4.34693	4.55801	4.64189	5.30128	4.22905	4.18128	3.75596	7.09353	7.8627	8.09775	9.29857	8.26338	9.45839	0.25468	0.242998	normal	0.00377528	0.453321	normal	0.435129	0.153286	normal	1.16e-15	1.09325	up	4.04e-26	1.31657	up	Signal transduction mechanisms	Biological Process: response to acid chemical (GO:0001101);; Molecular Function: molecular_function (GO:0003674);; Molecular Function: catalytic activity (GO:0003824);; Molecular Function: protein kinase activity (GO:0004672);; Molecular Function: protein serine/threonine kinase activity (GO:0004674);; Molecular Function: ATP binding (GO:0005524);; Cellular Component: cellular_component (GO:00055…	K07198|7.1e-206|cpap:110808308|K07198 5'-AMP-activated protein kinase, catalytic alpha subunit [EC:2.7.11.11] | (RefSeq) CBL-interacting serine/threonine-protein kinase 1	Signal transduction mechanisms	Protein kinase domain	CBL-interacting protein kinase 1 OS=Oryza sativa subsp. japonica OX=39947 GN=CIPK1 PE=2 SV=1	Signal transduction mechanisms	hypothetical protein C3L33_13069, partial [Rhododendron williamsianum]
VaccDscaff1-snap-gene-11.42	4.19034	2.6116	0.80013	5.45248	1.74748	4.52411	16.383	17.9143	14.7881	3.57912	9.11866	6.09689	10.4209	7.72396	4.86273	4.26926	0.749431	3.09721	0.361103	0.516266	normal	1.18e-05	2.35616	up	0.00906979	1.25851	up	0.000396086	1.60711	up	0.778549	0.216368	normal	--	Molecular Function: protein phosphatase inhibitor activity (GO:0004864);; Biological Process: defense response (GO:0006952);; Biological Process: abscisic acid-activated signaling pathway (GO:0009738);; Molecular Function: abscisic acid binding (GO:0010427);; Molecular Function: signaling receptor activity (GO:0038023);;	--	--	Pathogenesis-related protein Bet v 1 family	Major allergen Pru ar 1 OS=Prunus armeniaca OX=36596 PE=1 SV=1	Function unknown	hypothetical protein F0562_015615 [Nyssa sinensis]
VaccDscaff1-snap-gene-114.29	0.395672	0.600408	1.07574	1.91433	0.673748	1.85859	0.992865	0.977788	2.03351	0.867509	1.70304	1.79111	1.70739	0.648746	1.94331	0.681991	0.649899	0.307975	0.0249609	0.927961	normal	0.0153923	1.02624	normal	0.00839976	1.09249	up	0.0154208	1.09949	normal	0.773233	-0.173836	normal	Carbohydrate transport and metabolism;; Amino acid transport and metabolism;; Inorganic ion transport and metabolism;; General function prediction only	Molecular Function: inorganic phosphate transmembrane transporter activity (GO:0005315);; Biological Process: phosphate ion transport (GO:0006817);; Cellular Component: integral component of membrane (GO:0016021);;	K08176|7.0e-239|ccav:112529225|K08176 MFS transporter, PHS family, inorganic phosphate transporter | (RefSeq) inorganic phosphate transporter 1-4-like	Inorganic ion transport and metabolism	Sugar (and other) transporter	Probable inorganic phosphate transporter 1-3 OS=Arabidopsis thaliana OX=3702 GN=PHT1-3 PE=2 SV=1	Inorganic ion transport and metabolism	hypothetical protein F0562_035367 [Nyssa sinensis]
VaccDscaff1-snap-gene-116.55	30.9523	31.4525	31.1214	38.3888	38.6652	41.2068	97.2844	93.6034	97.2729	75.4004	72.5017	69.4419	65.1964	73.4545	77.9166	40.035	39.3495	38.382	3.45e-11	0.460122	normal	2.63e-225	1.80505	up	2.91e-100	1.34578	up	4.96e-61	1.36693	up	6.35e-15	0.485384	normal	Posttranslational modification, protein turnover, chaperones	Molecular Function: protein binding (GO:0005515);;	K00799|9.9e-141|adu:107482147|K00799 glutathione S-transferase [EC:2.5.1.18] | (RefSeq) uncharacterized protein LOC107482147	Posttranslational modification, protein turnover, chaperones	Glutathione S-transferase, N-terminal domain	Probable glutathione S-transferase OS=Nicotiana tabacum OX=4097 PE=2 SV=1	Posttranslational modification, protein turnover, chaperones	hypothetical protein Ahy_B10g106563 isoform A [Arachis hypogaea]
VaccDscaff1-snap-gene-116.59	0.952322	1.04466	0.883385	1.17015	1.22538	1.8187	2.09754	2.35428	2.21861	0.982669	0.869963	0.834292	0.69351	0.867037	0.888851	0.373815	0.441396	0.442147	0.0120595	0.622947	normal	3.35e-20	1.37477	up	0.915898	0.0325429	normal	0.799916	-0.0764727	normal	1.27e-05	-1.01542	down	Posttranslational modification, protein turnover, chaperones	Molecular Function: protein binding (GO:0005515);;	K00799|3.2e-154|adu:107482147|K00799 glutathione S-transferase [EC:2.5.1.18] | (RefSeq) uncharacterized protein LOC107482147	Posttranslational modification, protein turnover, chaperones	Glutathione S-transferase, N-terminal domain	Glutathione S-transferase U7 OS=Arabidopsis thaliana OX=3702 GN=GSTU7 PE=2 SV=1	Posttranslational modification, protein turnover, chaperones	hypothetical protein Ahy_B10g106563 isoform A [Arachis hypogaea]
VaccDscaff1-snap-gene-123.37	2.92162	3.03115	3.10094	2.71434	0.91086	1.78402	1.55432	1.38413	1.70031	2.34847	1.47688	1.83223	0.56186	0.826717	0.972489	1.23497	1.45163	1.17122	0.296986	-0.490927	normal	0.0198415	-0.73767	normal	0.137763	-0.517259	normal	7.13e-06	-1.64554	down	0.00121106	-1.03994	down	--	--	--	--	--	--	--	--
VaccDscaff1-snap-gene-124.47	0.287581	0.313595	0.271682	0.367273	0.18534	0.323743	0.14296	0.198401	0.178477	0.151109	0.206074	0.2188	0.113237	0.106913	0.143011	0.149265	0.132151	0.161541	0.852892	0.115561	normal	0.16687	-0.524257	normal	0.300586	-0.422241	normal	0.00868902	-1.01416	down	0.0339155	-0.771761	normal	General function prediction only	Molecular Function: ADP binding (GO:0043531);;	K15078|3.0e-145|tcc:18614561|K15078 structure-specific endonuclease subunit SLX1 [EC:3.6.1.-] | (RefSeq) putative disease resistance protein RGA3	Signal transduction mechanisms	NB-ARC domain	Putative disease resistance protein RGA4 OS=Solanum bulbocastanum OX=147425 GN=RGA4 PE=2 SV=1	Signal transduction mechanisms	hypothetical protein HYC85_019049 [Camellia sinensis]
VaccDscaff1-snap-gene-126.33	1.17021	1.05287	0.813508	0.572066	0.551412	0.873305	0.500484	0.607378	0.372211	0.414216	0.214005	0.229539	0.423413	0.287095	0.587007	0.780301	0.549808	0.56953	0.467211	-0.365303	normal	0.0651565	-0.773554	normal	0.000746294	-1.4605	down	0.0289698	-0.97468	normal	0.259743	-0.478201	normal	Coenzyme transport and metabolism	Molecular Function: catalytic activity (GO:0003824);; Biological Process: biosynthetic process (GO:0009058);; Cellular Component: integral component of membrane (GO:0016021);; Molecular Function: pyridoxal phosphate binding (GO:0030170);;	K00654|1.1e-185|jre:109004432|K00654 serine palmitoyltransferase [EC:2.3.1.50] | (RefSeq) long chain base biosynthesis protein 1 isoform X1	Posttranslational modification, protein turnover, chaperones	Aminotransferase class I and II	Long chain base biosynthesis protein 1 OS=Arabidopsis thaliana OX=3702 GN=LCB1 PE=1 SV=1	Posttranslational modification, protein turnover, chaperones	Long chain base biosynthesis protein [Actinidia chinensis var. chinensis]
VaccDscaff1-snap-gene-128.39	5.4043	6.70717	5.88588	3.24718	3.6784	2.56333	0.951313	0.375616	1.362	2.17436	1.97814	2.37892	1.37067	0.443032	2.0081	2.60781	1.14144	2.26601	2.16e-05	-0.762389	normal	2.96e-14	-2.4027	down	2.1e-17	-1.31034	down	0.000779742	-1.80152	down	8.31e-08	-1.38333	down	Lipid transport and metabolism;; General function prediction only	Cellular Component: membrane (GO:0016020);; Molecular Function: long-chain-alcohol oxidase activity (GO:0046577);; Molecular Function: flavin adenine dinucleotide binding (GO:0050660);;	K17756|0.0e+00|oeu:111391635|K17756 long-chain-alcohol oxidase [EC:1.1.3.20] | (RefSeq) long-chain-alcohol oxidase FAO1-like	--	GMC oxidoreductase	Long-chain-alcohol oxidase FAO1 OS=Lotus japonicus OX=34305 GN=FAO1 PE=1 SV=1	Energy production and conversion	hypothetical protein HYC85_019540 [Camellia sinensis]
VaccDscaff1-snap-gene-128.41	1.16187	1.11005	0.93405	0.765817	1.05297	0.625357	0.381808	0.524361	0.479862	0.703955	0.271877	0.179961	0.188332	0.229116	0.066494	0.267526	0.279294	0.494794	0.540509	-0.246708	normal	0.00014756	-0.987172	normal	0.00515623	-1.20064	down	5.13e-10	-2.35888	down	1.24e-05	-1.39228	down	--	Molecular Function: molecular_function (GO:0003674);; Molecular Function: motor activity (GO:0003774);; Molecular Function: microtubule motor activity (GO:0003777);; Molecular Function: catalytic activity (GO:0003824);; Molecular Function: binding (GO:0005488);; Molecular Function: protein binding (GO:0005515);; Molecular Function: ATP binding (GO:0005524);; Cellular Component: cellular_component…	K10398|3.7e-283|ccav:112522138|K10398 kinesin family member 11 | (RefSeq) kinesin-like protein KIN-10A	Cytoskeleton	Kinesin motor domain	Kinesin-like protein KIN-10A OS=Arabidopsis thaliana OX=3702 GN=KIN10A PE=1 SV=1	Cytoskeleton	hypothetical protein C3L33_12604, partial [Rhododendron williamsianum]
VaccDscaff1-snap-gene-133.17	1.03835	1.44878	1.45223	1.18833	0.957857	1.24312	2.04926	2.09142	2.10378	1.3829	1.7937	1.61519	1.08506	0.986746	0.88483	0.568232	0.390008	0.701799	0.871389	-0.0783992	normal	6.94e-05	0.831001	normal	0.143527	0.405834	normal	0.460023	-0.235472	normal	0.00100181	-1.03039	down	Amino acid transport and metabolism	Cellular Component: integral component of membrane (GO:0016021);; Molecular Function: transmembrane transporter activity (GO:0022857);;	K14638|3.6e-245|pxb:103949485|K14638 solute carrier family 15 (peptide/histidine transporter), member 3/4 | (RefSeq) uncharacterized protein LOC103949485	Amino acid transport and metabolism	POT family	Protein NRT1/ PTR FAMILY 5.2 OS=Arabidopsis thaliana OX=3702 GN=NPF5.2 PE=2 SV=1	Amino acid transport and metabolism	NRT1/ PTR FAMILY 5.2 [Spatholobus suberectus]
VaccDscaff1-snap-gene-134.22	0	0	0	0	0	0	0	0	0	0.091756	0.05175	0	0.117444	0.243965	0.147024	0.623732	0.886172	0.424934	--	--	--	--	--	--	--	--	--	--	--	--	1.13e-17	5.65552	up	Function unknown	Molecular Function: molecular_function (GO:0003674);; Molecular Function: catalytic activity (GO:0003824);; Cellular Component: cellular_component (GO:0005575);; Cellular Component: intracellular (GO:0005622);; Cellular Component: cell (GO:0005623);; Cellular Component: cytoplasm (GO:0005737);; Cellular Component: cytosol (GO:0005829);; Biological Process: lipid metabolic process (GO:0006629);; B…	K00574|0.0e+00|vvi:100249441|K00574 cyclopropane-fatty-acyl-phospholipid synthase [EC:2.1.1.79] | (RefSeq) tuberculostearic acid methyltransferase UfaA1	--	Mycolic acid cyclopropane synthetase	--	Cell wall/membrane/envelope biogenesis	hypothetical protein HYC85_019553 [Camellia sinensis]
VaccDscaff1-snap-gene-138.33	1.10024	0.639694	0.433362	0.651451	1.15568	1.0102	1.97454	1.73086	2.10419	1.87702	0.52153	0.661849	0.658539	1.45983	0.701313	0.943821	1.13721	1.86536	--	--	--	0.00179712	1.39406	up	--	--	--	--	--	--	--	--	--	Transcription	Cellular Component: DNA-directed RNA polymerase complex (GO:0000428);; Molecular Function: molecular_function (GO:0003674);; Molecular Function: DNA binding (GO:0003677);; Molecular Function: structural constituent of ribosome (GO:0003735);; Molecular Function: catalytic activity (GO:0003824);; Molecular Function: DNA-directed 5'-3' RNA polymerase activity (GO:0003899);; Cellular Component: cellu…	K03043|2.1e-90|aly:32283120|K03043 DNA-directed RNA polymerase subunit beta [EC:2.7.7.6] | (RefSeq) rpoB, B9N47_pgp083; RNA polymerase beta subunit	Transcription	RNA polymerase Rpb2, domain 6	DNA-directed RNA polymerase subunit beta OS=Draba nemorosa OX=171822 GN=rpoB PE=3 SV=1	Transcription	RNA polymerase beta subunit [Vaccinium uliginosum]
VaccDscaff1-snap-gene-148.38	0.25391	0.692872	0.409677	0.318189	0.401312	0.613437	0.387479	0.197187	0.522956	0.904685	1.02123	0.614495	1.0723	1.1706	1.25211	1.56834	1.01417	1.39785	--	--	--	--	--	--	0.0643536	0.908192	normal	0.00103104	1.40259	up	0.000203061	1.57798	up	General function prediction only	Cellular Component: cellular_component (GO:0005575);; Cellular Component: intracellular (GO:0005622);; Cellular Component: cell (GO:0005623);; Cellular Component: cytoplasm (GO:0005737);; Biological Process: organelle organization (GO:0006996);; Biological Process: biological_process (GO:0008150);; Cellular Component: chloroplast (GO:0009507);; Cellular Component: plastid envelope (GO:0009526);; …	--	General function prediction only	Photosynthesis system II assembly factor YCF48	Photosystem II stability/assembly factor HCF136, chloroplastic OS=Arabidopsis thaliana OX=3702 GN=HCF136 PE=1 SV=1	Intracellular trafficking, secretion, and vesicular transport	Photosystem II stability/assembly factor like [Actinidia chinensis var. chinensis]
VaccDscaff1-snap-gene-16.43	0.429634	0.428808	0.36509	0.456599	0.449365	0.512583	0.195214	0.334729	0.293225	0.190475	0.183595	0.221469	0.087033	0.083926	0.194247	0.19725	0.158194	0.246522	0.531397	0.288008	normal	0.430442	-0.362232	normal	0.0439443	-0.822983	normal	0.00404603	-1.38875	down	0.0589532	-0.800913	normal		Molecular Function: MAP kinase kinase kinase activity (GO:0004709);; Molecular Function: ATP binding (GO:0005524);;	K04424|1.1e-99|sbi:8085533|K04424 sterile alpha motif and leucine zipper containing kinase AZK [EC:2.7.11.25] | (RefSeq) serine/threonine-protein kinase EDR1	Signal transduction mechanisms	Protein tyrosine and serine/threonine kinase	Probable serine/threonine-protein kinase SIS8 OS=Arabidopsis thaliana OX=3702 GN=SIS8 PE=1 SV=1	Signal transduction mechanisms	hypothetical protein F0562_005865 [Nyssa sinensis]
VaccDscaff1-snap-gene-176.37	1.1876	1.02484	1.25329	1.26637	1.58164	1.10269	3.46319	3.21102	3.29364	4.52019	4.19012	5.0762	2.95813	2.48883	2.15402	3.06741	2.60599	2.56236	0.60123	0.260124	normal	7.97e-12	1.64454	up	1.45e-19	2.04616	up	2.62e-05	1.24458	up	2.94e-07	1.35599	up	Inorganic ion transport and metabolism	Biological Process: response to oxidative stress (GO:0006979);; Molecular Function: L-ascorbate peroxidase activity (GO:0016688);; Molecular Function: heme binding (GO:0020037);;	K00434|6.3e-136|cic:CICLE_v10012554mg|K00434 L-ascorbate peroxidase [EC:1.11.1.11] | (RefSeq) hypothetical protein	--	Peroxidase	L-ascorbate peroxidase 2, cytosolic OS=Arabidopsis thaliana OX=3702 GN=APX2 PE=2 SV=3	Amino acid transport and metabolism	hypothetical protein F0562_016420 [Nyssa sinensis]
VaccDscaff1-snap-gene-176.38	0.417366	0.410641	0.494185	0.150726	0.122184	0.194419	0.197637	0.173529	0.261085	0.536916	0.305794	0.313276	0.110705	0.018478	0.100531	0.250762	0.153564	0.189786	0.011313	-1.02327	normal	0.0724662	-0.782736	normal	0.922196	-0.0580887	normal	0.000217701	-1.96218	down	0.0397599	-0.911345	normal		Molecular Function: protein kinase activity (GO:0004672);; Molecular Function: ATP binding (GO:0005524);; Cellular Component: integral component of membrane (GO:0016021);;	K16224|2.0e-108|bna:106356473|K16224 senescence-induced receptor-like serine/threonine-protein kinase | (RefSeq) senescence-induced receptor-like serine/threonine-protein kinase	--	Malectin-like domain	Probable LRR receptor-like serine/threonine-protein kinase At1g67720 OS=Arabidopsis thaliana OX=3702 GN=At1g67720 PE=1 SV=1	Signal transduction mechanisms	LRR receptor-like serine/threonine-protein kinase precursor [Actinidia chinensis var. chinensis]
VaccDscaff1-snap-gene-176.40	0.791984	1.00602	1.19003	0.730444	0.430472	0.763073	0.325409	0.351324	0.4919	0.642525	0.136902	0.45824	0.565914	0.57894	0.814779	0.570168	0.491344	0.827478	0.216043	-0.446709	normal	0.000109439	-1.11332	down	0.0208007	-1.02536	normal	0.155501	-0.437685	normal	0.133479	-0.486224	normal	--	Molecular Function: molecular_function (GO:0003674);; Molecular Function: catalytic activity (GO:0003824);; Molecular Function: ubiquitin-protein transferase activity (GO:0004842);; Cellular Component: cellular_component (GO:0005575);; Cellular Component: intracellular (GO:0005622);; Cellular Component: cell (GO:0005623);; Cellular Component: cytoplasm (GO:0005737);; Biological Process: cellular …	K10590|0.0e+00|vvi:100243094|K10590 E3 ubiquitin-protein ligase TRIP12 [EC:2.3.2.26] | (RefSeq) E3 ubiquitin-protein ligase UPL4	Posttranslational modification, protein turnover, chaperones	HECT-domain (ubiquitin-transferase)	E3 ubiquitin-protein ligase UPL4 OS=Arabidopsis thaliana OX=3702 GN=UPL4 PE=3 SV=1	Posttranslational modification, protein turnover, chaperones	hypothetical protein C3L33_12433, partial [Rhododendron williamsianum]
VaccDscaff1-snap-gene-177.25	1.80569	1.36298	1.70582	0.32542	0.324121	1.17528	0.203249	1.35505	0.518882	0.312864	0.503932	0	1.19763	0.424227	1.80249	1.07767	2.41849	1.67073	0.106327	-0.812877	normal	0.171123	-0.852332	normal	0.00488162	-1.73295	down	0.619833	-0.316672	normal	0.687625	0.217133	normal	Translation, ribosomal structure and biogenesis	Molecular Function: structural constituent of ribosome (GO:0003735);; Biological Process: translation (GO:0006412);; Cellular Component: small ribosomal subunit (GO:0015935);;	K02973|8.8e-75|cann:107873446|K02973 small subunit ribosomal protein S23e | (RefSeq) 40S ribosomal protein S23	Translation, ribosomal structure and biogenesis	Ribosomal protein S12/S23	40S ribosomal protein S23 OS=Fragaria ananassa OX=3747 GN=RPS23 PE=2 SV=1	Translation, ribosomal structure and biogenesis	uncharacterized protein LOC102577739 [Solanum tuberosum]
VaccDscaff1-snap-gene-18.55	5.07335	3.84583	5.17987	4.54966	4.27798	4.0988	2.91914	4.38097	3.35993	2.73188	2.60137	3.22398	1.40954	2.07167	1.57453	2.09968	1.71578	1.78802	0.999184	0.000553162	normal	0.486145	-0.213802	normal	0.0253267	-0.570184	normal	4.22e-06	-1.27464	down	4.25e-06	-1.14392	down	Signal transduction mechanisms	Molecular Function: nucleotide binding (GO:0000166);; Molecular Function: molecular_function (GO:0003674);; Molecular Function: enzyme inhibitor activity (GO:0004857);; Molecular Function: binding (GO:0005488);; Cellular Component: cellular_component (GO:0005575);; Cellular Component: cell (GO:0005623);; Cellular Component: plasma membrane (GO:0005886);; Molecular Function: drug binding (GO:00081…	K00847|3.0e-07|bna:106428977|K00847 fructokinase [EC:2.7.1.4] | (RefSeq) probable fructokinase-1 isoform X1	--	Universal stress protein family	Putative pectinesterase/pectinesterase inhibitor 26 OS=Arabidopsis thaliana OX=3702 GN=PME26 PE=2 SV=1	Function unknown	hypothetical protein C3L33_12974, partial [Rhododendron williamsianum]
VaccDscaff1-snap-gene-204.37	0.971536	0.71744	0.878077	1.09384	0.113594	1.15439	0.317101	0.203347	0.065731	0.161138	0.314985	0.25292	0.096827	0.605246	0.834009	0.308916	0.30024	0.400232	0.996503	0.00466172	normal	0.000712311	-1.66293	down	0.000282509	-1.49872	down	0.445083	-0.510433	normal	0.00381051	-1.10769	down	Carbohydrate transport and metabolism	Molecular Function: 1,4-alpha-glucan branching enzyme activity (GO:0003844);; Molecular Function: hydrolase activity, hydrolyzing O-glycosyl compounds (GO:0004553);; Biological Process: glycogen biosynthetic process (GO:0005978);; Molecular Function: cation binding (GO:0043169);;	K00700|5.2e-243|qsu:112012245|K00700 1,4-alpha-glucan branching enzyme [EC:2.4.1.18] | (RefSeq) 1,4-alpha-glucan-branching enzyme 1, chloroplastic/amyloplastic-like isoform X1	Carbohydrate transport and metabolism	Alpha amylase, C-terminal all-beta domain	1,4-alpha-glucan-branching enzyme 1, chloroplastic/amyloplastic OS=Pisum sativum OX=3888 GN=SBEI PE=1 SV=1	Carbohydrate transport and metabolism	1,4-alpha-glucan-branching enzyme 2-2, chloroplastic/amyloplastic [Morus notabilis]
VaccDscaff1-snap-gene-22.47	13.6785	12.462	12.6432	18.5332	16.8909	19.1297	56.0547	56.6917	53.3762	20.8366	19.6292	20.4083	9.55458	10.739	10.7769	2.11197	2.30634	2.29912	1.57e-07	0.605685	normal	2.18e-159	2.27262	up	1.52e-13	0.776299	normal	0.328649	-0.159144	normal	7.23e-51	-2.34676	down	--	Biological Process: defense response (GO:0006952);;	--	--	Pathogenesis-related protein Bet v 1 family	Major allergen Pru ar 1 OS=Prunus armeniaca OX=36596 PE=1 SV=1	Function unknown	hypothetical protein C3L33_13018, partial [Rhododendron williamsianum]
VaccDscaff1-snap-gene-22.56	2.65186	3.05149	2.48684	7.15122	4.9187	6.29988	5.7945	6.49235	6.86303	3.15899	3.73892	3.28094	1.48936	2.07522	2.76704	1.90017	2.87446	2.13363	4.38e-11	1.22033	up	2.05e-18	1.38631	up	0.0473765	0.437661	normal	0.544443	-0.207136	normal	0.782819	-0.0906838	normal	--	Biological Process: defense response (GO:0006952);;	K03676|8.4e-18|han:110906567|K03676 glutaredoxin 3 | (RefSeq) glutaredoxin-like	--	Protein of unknown function (DUF789)	Major allergen Pru ar 1 OS=Prunus armeniaca OX=36596 PE=1 SV=1	Function unknown	hypothetical protein C3L33_12945, partial [Rhododendron williamsianum]
VaccDscaff1-snap-gene-237.26	0.581035	1.88949	0.431811	2.62515	2.11777	2.30279	3.21218	1.50186	1.95907	0.997268	3.08136	4.65813	2.16641	6.1115	0.573968	5.33504	1.12268	4.51714	0.0393471	0.953786	normal	0.0375549	1.16409	normal	0.0199042	1.36378	normal	0.0367936	1.41782	normal	0.0028604	1.76594	up	Translation, ribosomal structure and biogenesis	Molecular Function: structural constituent of ribosome (GO:0003735);; Cellular Component: ribosome (GO:0005840);; Biological Process: translation (GO:0006412);; Molecular Function: rRNA binding (GO:0019843);;	K02987|6.0e-104|cmax:111491616|K02987 small subunit ribosomal protein S4e | (RefSeq) 40S ribosomal protein S4-3-like	Translation, ribosomal structure and biogenesis	40S ribosomal protein S4 C-terminus	40S ribosomal protein S4-2 OS=Arabidopsis thaliana OX=3702 GN=RPS4B PE=2 SV=4	Translation, ribosomal structure and biogenesis	40S ribosomal protein S4-2 isoform X1 [Abrus precatorius]
VaccDscaff1-snap-gene-247.18	4.74239	4.94275	5.51779	15.431	17.0027	18.4246	8.12288	7.80492	7.93516	4.68417	4.14353	2.84135	2.80831	1.65049	1.92568	1.18531	0.721095	0.848254	5.89e-35	1.79936	up	1.56e-06	0.822725	normal	0.45196	-0.236593	normal	0.000277103	-1.03901	down	3.21e-15	-2.21249	down	--	Molecular Function: peroxidase activity (GO:0004601);; Cellular Component: extracellular region (GO:0005576);; Biological Process: response to oxidative stress (GO:0006979);; Molecular Function: heme binding (GO:0020037);; Biological Process: hydrogen peroxide catabolic process (GO:0042744);; Molecular Function: metal ion binding (GO:0046872);;	K00430|3.7e-137|vvi:100263665|K00430 peroxidase [EC:1.11.1.7] | (RefSeq) cationic peroxidase 1	--	Peroxidase	Cationic peroxidase 1 OS=Arachis hypogaea OX=3818 GN=PNC1 PE=1 SV=2	Secondary metabolites biosynthesis, transport and catabolism	hypothetical protein F0562_015155 [Nyssa sinensis]
VaccDscaff1-snap-gene-253.35	0.690893	0.530486	0.514195	0.174335	0.30142	0.454296	0.14895	0.129514	0.186811	0.527139	0.21003	0.273301	0.444974	0.254619	0.268079	0.499745	0.476571	0.451326	0.23685	-0.578826	normal	0.000265974	-1.51004	down	0.251775	-0.566548	normal	0.187317	-0.613074	normal	0.793536	-0.120751	normal	Amino acid transport and metabolism	Molecular Function: serine-type endopeptidase activity (GO:0004252);; Molecular Function: serine-type exopeptidase activity (GO:0070008);;	K01354|6.4e-74|lja:Lj5g3v2263920.1|K01354 oligopeptidase B [EC:3.4.21.83] | (RefSeq) Lj5g3v2263920.1; -	Posttranslational modification, protein turnover, chaperones	Prolyl oligopeptidase, N-terminal beta-propeller domain	--	Posttranslational modification, protein turnover, chaperones	hypothetical protein HYC85_002467 [Camellia sinensis]
VaccDscaff1-snap-gene-258.37	0.699868	0.877369	0.858628	0.524312	0.673262	0.547313	0.800134	0.932039	0.714529	0.284813	0.327639	0.24345	0.152915	0.219879	0.186834	0.229715	0.323974	0.159859	0.456569	-0.312657	normal	0.608494	0.182337	normal	0.000177112	-1.2674	down	1.21e-06	-1.80397	down	5.62e-05	-1.51888	down	--	Biological Process: cell fate specification (GO:0001708);; Biological Process: regionalization (GO:0003002);; Molecular Function: molecular_function (GO:0003674);; Molecular Function: nucleic acid binding (GO:0003676);; Molecular Function: DNA binding (GO:0003677);; Molecular Function: transcription factor activity, sequence-specific DNA binding (GO:0003700);; Molecular Function: binding (GO:0005…	K14494|6.3e-66|mesc:110605206|K14494 DELLA protein | (RefSeq) DELLA protein GAIP-B-like	--	GRAS domain family	Protein SCARECROW OS=Ipomoea nil OX=35883 GN=SCR PE=1 SV=1	Transcription	hypothetical protein C3L33_12248, partial [Rhododendron williamsianum]
VaccDscaff1-snap-gene-280.25	1.25501	1.11623	1.27791	0.509051	0.528139	0.830198	0.57052	0.494436	0.457591	0.661602	0.547418	0.294245	1.11392	1.04281	0.848544	0.856462	0.480038	0.853005	0.00749321	-0.753595	normal	8.81e-06	-1.04377	down	0.0004858	-1.07661	down	0.714157	-0.111254	normal	0.057667	-0.562262	normal	--	--	K06677|0.0e+00|vvi:100855284|K06677 condensin complex subunit 1 | (RefSeq) condensin complex subunit 1	Chromatin structure and dynamics;; Cell cycle control, cell division, chromosome partitioning	non-SMC mitotic condensation complex subunit 1	--	--	hypothetical protein C3L33_12204, partial [Rhododendron williamsianum]
VaccDscaff1-snap-gene-284.29	2.31263	2.0395	1.53258	1.30071	0.972098	1.37102	3.1579	3.30589	2.52368	0.384752	0.45266	0.575701	1.73639	0.809857	1.61547	0.819319	1.54043	2.07946	0.150642	-0.491288	normal	0.00183373	0.770833	normal	2.42e-08	-1.79078	down	0.445337	-0.315111	normal	0.608771	-0.236436	normal	Cell wall/membrane/envelope biogenesis	Molecular Function: UDP-N-acetylglucosamine-dolichyl-phosphate N-acetylglucosaminephosphotransferase activity (GO:0003975);; Biological Process: dolichol-linked oligosaccharide biosynthetic process (GO:0006488);; Molecular Function: phospho-N-acetylmuramoyl-pentapeptide-transferase activity (GO:0008963);; Cellular Component: integral component of membrane (GO:0016021);;	K01001|3.6e-188|dcr:108224420|K01001 UDP-N-acetylglucosamine--dolichyl-phosphate N-acetylglucosaminephosphotransferase [EC:2.7.8.15] | (RefSeq) UDP-N-acetylglucosamine--dolichyl-phosphate N-acetylglucosaminephosphotransferase	Carbohydrate transport and metabolism	Glycosyl transferase family 4	--	Carbohydrate transport and metabolism	UDP-N-acetylglucosamine--dolichyl-phosphate N-acetylglucosaminephosphotransferase-like [Camellia sinensis]
VaccDscaff1-snap-gene-287.31	5.79636	5.86872	5.85565	7.46657	9.82441	8.55719	5.19294	5.79234	4.68015	2.60622	3.59041	2.9457	3.09356	2.128	2.41601	2.28367	2.29709	1.7618	5.2e-05	0.659137	normal	0.920331	0.0234897	normal	9.53e-05	-0.783998	normal	1.05e-06	-1.00925	down	4.89e-12	-1.29153	down	--	Cellular Component: integral component of membrane (GO:0016021);;	K15285|2.6e-39|mus:103979129|K15285 solute carrier family 35, member E3 | (RefSeq) UDP-galactose transporter 1	Carbohydrate transport and metabolism;; Amino acid transport and metabolism	Triose-phosphate Transporter family	UDP-URONIC ACID TRANSPORTER 1 OS=Arabidopsis thaliana OX=3702 GN=UUAT1 PE=1 SV=1	--	UDP-URONIC ACID TRANSPORTER 1 [Camellia sinensis]
VaccDscaff1-snap-gene-288.30	0.158259	0.267375	0.199779	0.693142	0.746303	0.765933	9.69001	10.327	8.87919	4.90445	4.26853	4.8394	3.7123	4.49365	4.35432	0.743056	0.744733	0.629811	1.25e-08	1.64962	up	4.73e-225	5.58795	up	8.11e-119	4.48104	up	2.18e-94	4.37032	up	1.92e-08	1.81371	up	--	Molecular Function: UDP-glycosyltransferase activity (GO:0008194);;	K13495|7.4e-150|jre:109018092|K13495 cis-zeatin O-glucosyltransferase [EC:2.4.1.215] | (RefSeq) zeatin O-glucosyltransferase-like	Carbohydrate transport and metabolism;; Energy production and conversion	UDP-glucoronosyl and UDP-glucosyl transferase	Zeatin O-glucosyltransferase OS=Phaseolus lunatus OX=3884 GN=ZOG1 PE=2 SV=1	--	hypothetical protein G4B88_020847 [Cannabis sativa]
VaccDscaff1-snap-gene-290.28	2.1318	2.15019	1.88964	1.71618	1.10403	2.00793	4.04719	3.6172	3.52626	5.62167	4.06463	6.05002	4.36229	4.41935	5.45392	4.85586	4.32875	4.55883	0.738611	-0.186243	normal	5.93e-05	1.00643	up	9.84e-09	1.42042	up	6.24e-08	1.3225	up	2.97e-08	1.27698	up	--	Molecular Function: UDP-glycosyltransferase activity (GO:0008194);;	K13495|3.7e-97|oeu:111377985|K13495 cis-zeatin O-glucosyltransferase [EC:2.4.1.215] | (RefSeq) zeatin O-glucosyltransferase-like	Carbohydrate transport and metabolism;; Energy production and conversion	UDP-glucoronosyl and UDP-glucosyl transferase	Zeatin O-glucosyltransferase OS=Phaseolus lunatus OX=3884 GN=ZOG1 PE=2 SV=1	--	Zeatin O-glucosyltransferase [Actinidia chinensis var. chinensis]
VaccDscaff1-snap-gene-305.30	0.966695	0.548415	0.365926	1.05621	0.983824	0.992789	1.194	1.10739	0.699868	0.981466	0.8411	0.663815	0.83415	1.47232	0.89833	1.53898	1.28045	1.93693	0.296337	0.562825	normal	0.197303	0.728046	normal	--	--	--	--	--	--	0.00504483	1.34431	up	General function prediction only	--	--	Coenzyme transport and metabolism	CobW/HypB/UreG, nucleotide-binding domain	--	Coenzyme transport and metabolism	hypothetical protein C3L33_08854, partial [Rhododendron williamsianum]
VaccDscaff1-snap-gene-311.45	1.23015	0.79034	0.899013	3.43188	3.49435	3.31363	1.28935	1.46214	0.802566	0.575899	0.302354	0.367367	0.923068	0.698729	0.560926	0.41666	0.087787	0	1.85e-05	1.50211	up	--	--	--	--	--	--	--	--	--	--	--	--	--	--	--	--	--	--	--	hypothetical protein C3L33_12108, partial [Rhododendron williamsianum]
VaccDscaff1-snap-gene-313.42	1.96862	1.94317	1.83668	2.15476	1.6679	1.109	2.32378	2.3012	2.85681	3.10999	3.85107	3.87222	2.14716	2.18926	2.68593	2.15833	2.5157	2.14787	0.879577	-0.0837774	normal	0.0112509	0.553209	normal	3.17e-07	1.02184	up	0.060194	0.440955	normal	0.0845198	0.392275	normal	--	--	--	--	--	--	--	--
VaccDscaff1-snap-gene-315.27	2.04246	1.68472	1.07972	1.79285	1.77848	1.50932	1.49436	2.6034	1.86895	3.81203	2.73839	2.74518	2.6615	2.48727	1.89031	2.46535	3.38796	2.97187	0.762284	0.170979	normal	0.267948	0.459849	normal	0.00148592	1.0151	up	0.0688788	0.678259	normal	0.00261343	0.983345	normal	--	Molecular Function: channel activity (GO:0015267);; Cellular Component: integral component of membrane (GO:0016021);;	K09875|7.2e-98|zju:107404040|K09875 aquaporin SIP | (RefSeq) aquaporin SIP1-1-like	Carbohydrate transport and metabolism	Major intrinsic protein	Aquaporin SIP1-2 OS=Zea mays OX=4577 GN=SIP1-2 PE=2 SV=1	Carbohydrate transport and metabolism	aquaporin SIP1-2-like [Camellia sinensis]
VaccDscaff1-snap-gene-316.32	9.18826	9.70082	8.84577	5.88373	7.62689	7.30188	3.33152	4.1618	3.24459	6.42056	3.87347	4.88123	4.24853	4.29945	3.46117	2.7935	1.33672	3.03366	0.111922	-0.281921	normal	1.65e-16	-1.17032	down	4.31e-05	-0.727088	normal	6.94e-12	-1.03017	down	8.98e-13	-1.74824	down	Coenzyme transport and metabolism	Molecular Function: transaminase activity (GO:0008483);; Molecular Function: pyridoxal phosphate binding (GO:0030170);;	K16871|2.9e-254|dzi:111314578|K16871 4-aminobutyrate---pyruvate transaminase [EC:2.6.1.96] | (RefSeq) gamma aminobutyrate transaminase 3, chloroplastic-like isoform X1	Amino acid transport and metabolism	Aminotransferase class-III	Gamma aminobutyrate transaminase 3, chloroplastic OS=Solanum lycopersicum OX=4081 GN=GABA-TP3 PE=1 SV=1	Amino acid transport and metabolism	hypothetical protein F0562_010644 [Nyssa sinensis]
VaccDscaff1-snap-gene-317.29	67.4353	68.0583	65.7948	93.8335	92.7453	91.4175	181.601	180.595	174.392	153.478	147.609	150.417	145.957	148.749	147.896	120.66	116.107	122.596	1.07e-30	0.588136	normal	5.3e-220	1.59705	up	1.38e-143	1.29583	up	4.84e-104	1.29615	up	9.99e-89	0.98888	normal	--	Molecular Function: UDP-glycosyltransferase activity (GO:0008194);; Molecular Function: transferase activity, transferring hexosyl groups (GO:0016758);;	K22950|3.4e-111|fve:101295404|K22950 acylphloroglucinol glucosyltransferase [EC:2.4.1.358] | (RefSeq) anthocyanidin 3-O-glucosyltransferase 2-like	Carbohydrate transport and metabolism;; Energy production and conversion	UDP-glucoronosyl and UDP-glucosyl transferase	Putative UDP-glucose flavonoid 3-O-glucosyltransferase 3 OS=Fragaria ananassa OX=3747 GN=GT3 PE=2 SV=1	--	hypothetical protein DVH24_032592 [Malus domestica]
VaccDscaff1-snap-gene-318.46	9.97881	9.50657	9.22467	10.5404	10.766	10.6837	27.4975	27.6031	25.3038	23.1473	22.5768	21.7709	21.7262	21.2205	20.8418	21.2966	18.8943	20.2089	0.00375485	0.276647	normal	4.28e-106	1.66401	up	3.63e-73	1.36028	up	1.19e-55	1.30875	up	5.52e-56	1.22286	up	--	Molecular Function: UDP-glycosyltransferase activity (GO:0008194);; Molecular Function: transferase activity, transferring hexosyl groups (GO:0016758);;	K08237|5.2e-121|tcc:18606668|K08237 hydroquinone glucosyltransferase [EC:2.4.1.218] | (RefSeq) uncharacterized LOC18606668	Carbohydrate transport and metabolism;; Energy production and conversion	UDP-glucoronosyl and UDP-glucosyl transferase	UDP-glucose flavonoid 3-O-glucosyltransferase 6 OS=Fragaria ananassa OX=3747 GN=GT6 PE=1 SV=1	--	hypothetical protein DVH24_032592 [Malus domestica]
VaccDscaff1-snap-gene-320.33	1.04382	0.740692	1.64638	0.998975	1.14619	1.02175	1.42673	0.828356	1.10424	2.02322	1.34831	1.461	1.99743	2.66927	2.13422	1.94118	2.56816	2.15772	0.9922	0.008789	normal	0.814416	0.140187	normal	0.231636	0.560738	normal	0.00771268	1.06969	up	0.00869245	1.04347	up	Posttranslational modification, protein turnover, chaperones	--	K13993|9.1e-09|egr:104452453|K13993 HSP20 family protein | (RefSeq) 18.1 kDa class I heat shock protein	Posttranslational modification, protein turnover, chaperones	Hsp20/alpha crystallin family	17.0 kDa class II heat shock protein OS=Zea mays OX=4577 GN=HSP18 PE=2 SV=1	Posttranslational modification, protein turnover, chaperones	Small heat shock protein [Actinidia chinensis var. chinensis]
VaccDscaff1-snap-gene-320.35	1.55006	1.61527	1.04368	1.35816	1.39528	1.62396	2.78194	2.93872	2.99155	2.79375	2.49833	3.69549	3.47449	3.68422	3.99928	2.78095	4.11108	2.90033	0.750814	0.157794	normal	6.81e-07	1.19175	up	1.71e-05	1.168	up	7.2e-11	1.5225	up	1.31e-06	1.32424	up	--	Cellular Component: cellular_component (GO:0005575);; Cellular Component: intracellular (GO:0005622);; Cellular Component: cell (GO:0005623);; Cellular Component: cytoplasm (GO:0005737);; Biological Process: sulfur compound metabolic process (GO:0006790);; Biological Process: biological_process (GO:0008150);; Biological Process: metabolic process (GO:0008152);; Molecular Function: methyltransfera…	K22746|1.4e-101|vvi:100263292|K22746 anamorsin | (RefSeq) anamorsin homolog	Function unknown	Cytokine-induced anti-apoptosis inhibitor 1, Fe-S biogenesis	Anamorsin homolog OS=Vitis vinifera OX=29760 GN=VIT_01s0010g01180 PE=3 SV=1	Translation, ribosomal structure and biogenesis	hypothetical protein C3L33_12064, partial [Rhododendron williamsianum]
VaccDscaff1-snap-gene-322.28	0.03464	0.037442	0.003524	0.029065	0.105333	0.006053	0.162131	0.114803	0.037063	0.074415	0.129467	0.39625	0.327102	0.233669	0.071595	0.329023	0.243528	0.232255	--	--	--	--	--	--	--	--	--	--	--	--	1.01e-09	3.08464	up	--	Molecular Function: ADP binding (GO:0043531);;	K13459|1.9e-26|mdm:103422584|K13459 disease resistance protein RPS2 | (RefSeq) LOW QUALITY PROTEIN: disease resistance protein At4g27190-like	--	Leucine Rich repeats (2 copies)	--	Signal transduction mechanisms	Disease resistance protein [Actinidia chinensis var. chinensis]
VaccDscaff1-snap-gene-326.44	25.7651	25.2238	16.9212	16.6884	16.6055	15.7772	9.9676	7.62796	8.52584	7.02853	5.61264	6.59595	5.86915	2.82718	3.42383	5.21066	5.13539	4.60333	0.0692827	-0.330109	normal	3.18e-12	-1.17064	down	9.28e-25	-1.65733	down	1.05e-20	-2.25099	down	3.17e-35	-2.00249	down	Signal transduction mechanisms	Molecular Function: molecular_function (GO:0003674);; Molecular Function: catalytic activity (GO:0003824);; Molecular Function: protein kinase activity (GO:0004672);; Molecular Function: ATP binding (GO:0005524);; Cellular Component: cellular_component (GO:0005575);; Cellular Component: intracellular (GO:0005622);; Cellular Component: cell (GO:0005623);; Cellular Component: nucleus (GO:0005634);;…	K14502|4.6e-217|qsu:111995841|K14502 protein brassinosteroid insensitive 2 [EC:2.7.11.1] | (RefSeq) shaggy-related protein kinase eta-like	Carbohydrate transport and metabolism	Protein kinase domain	Shaggy-related protein kinase zeta OS=Arabidopsis thaliana OX=3702 GN=ASK6 PE=1 SV=2	Signal transduction mechanisms	hypothetical protein C3L33_12056, partial [Rhododendron williamsianum]
VaccDscaff1-snap-gene-327.34	19.4278	16.8945	20.1186	35.3584	31.9241	36.4117	54.6557	44.6566	51.3721	17.574	19.4259	17.809	7.9062	8.8829	9.32851	3.75869	2.59785	2.76582	1.28e-17	0.980737	normal	6.44e-41	1.58759	up	0.629748	0.0901845	normal	3.88e-10	-0.944132	normal	5.9e-42	-2.43708	down	--	Molecular Function: peroxidase activity (GO:0004601);; Cellular Component: cellular_component (GO:0005575);; Cellular Component: extracellular region (GO:0005576);; Cellular Component: cell wall (GO:0005618);; Cellular Component: intracellular (GO:0005622);; Cellular Component: cell (GO:0005623);; Cellular Component: cytoplasm (GO:0005737);; Cellular Component: Golgi apparatus (GO:0005794);; Cell…	K00430|1.4e-134|vvi:100264421|K00430 peroxidase [EC:1.11.1.7] | (RefSeq) peroxidase P7	--	Peroxidase	Peroxidase 52 OS=Arabidopsis thaliana OX=3702 GN=PER52 PE=2 SV=1	Secondary metabolites biosynthesis, transport and catabolism	hypothetical protein C3L33_12055, partial [Rhododendron williamsianum]
VaccDscaff1-snap-gene-346.35	3.69753	2.97711	1.75562	1.88549	2.01943	2.73795	1.53612	2.01425	0.84381	1.09931	1.39136	1.22845	1.91661	2.21255	1.22022	1.12544	1.12409	1.09648	0.705375	-0.188545	normal	0.0817895	-0.697156	normal	0.00280504	-0.979011	normal	0.245756	-0.459319	normal	0.000430631	-1.12864	down	--	Cellular Component: plasma membrane (GO:0005886);; Biological Process: protein transport (GO:0015031);; Cellular Component: integral component of membrane (GO:0016021);; Cellular Component: transport vesicle membrane (GO:0030658);;	K19995|6.9e-133|jre:109022292|K19995 secretory carrier-associated membrane protein | (RefSeq) secretory carrier-associated membrane protein 1 isoform X1	Intracellular trafficking, secretion, and vesicular transport	SCAMP family	Putative secretory carrier-associated membrane protein 1 OS=Oryza sativa subsp. indica OX=39946 GN=SCAMP1 PE=3 SV=1	Intracellular trafficking, secretion, and vesicular transport	Secretory carrier-associated membrane protein [Actinidia chinensis var. chinensis]
VaccDscaff1-snap-gene-346.41	2.69544	1.99316	2.3866	2.45407	2.06424	1.8141	3.00767	3.23274	4.04806	6.50935	4.66785	4.36647	4.52672	4.24348	5.20149	4.46115	4.87348	5.01057	0.961163	-0.0322739	normal	0.0235441	0.690597	normal	1.01e-05	1.20704	up	3.94e-05	1.10214	up	7.15e-06	1.14312	up	--	Molecular Function: folic acid binding (GO:0005542);; Molecular Function: transferase activity (GO:0016740);;	K20600|1.4e-34|ccav:112529365|K20600 mitogen-activated protein kinase 4 [EC:2.7.11.24] | (RefSeq) mitogen-activated protein kinase 4-like isoform X1	--	Formiminotransferase domain, N-terminal subdomain	--	Function unknown	hypothetical protein C3L33_11976, partial [Rhododendron williamsianum]
VaccDscaff1-snap-gene-363.30	0.61002	0.641904	0.609616	0.186213	0.32818	0.271771	0.351784	0.304814	0.425732	0.365016	0.454057	0.492129	0.309535	0.24791	0.246364	0.382179	0.507694	0.432216	0.000796452	-0.983918	normal	0.035942	-0.576275	normal	0.225975	-0.358733	normal	0.00030112	-1.00525	down	0.232822	-0.333371	normal	--	Molecular Function: ADP binding (GO:0043531);;	K13459|4.7e-134|vvi:104880792|K13459 disease resistance protein RPS2 | (RefSeq) probable disease resistance protein At4g27220	Signal transduction mechanisms	NB-ARC domain	Disease resistance protein At4g27190 OS=Arabidopsis thaliana OX=3702 GN=At4g27190 PE=2 SV=1	Signal transduction mechanisms	hypothetical protein HYC85_011332 [Camellia sinensis]
VaccDscaff1-snap-gene-373.46	5.85234	6.36201	7.90328	12.8132	14.4359	14.4737	8.63536	8.73989	8.28486	6.4972	7.6063	4.85249	8.80627	6.398	7.30317	9.59195	8.34312	8.22254	2.14e-12	1.12756	up	0.004006	0.52702	normal	0.893422	0.0469253	normal	0.181949	0.317819	normal	0.00568291	0.524508	normal	--	Molecular Function: protein tyrosine phosphatase activity (GO:0004725);;	K18045|5.2e-87|hbr:110642548|K18045 tyrosine-protein phosphatase SIW14 [EC:3.1.3.48] | (RefSeq) probable tyrosine-protein phosphatase At1g05000	Defense mechanisms	Tyrosine phosphatase family	Tyrosine-protein phosphatase DSP1 OS=Arabidopsis thaliana OX=3702 GN=DSP1 PE=1 SV=1	Defense mechanisms	probable tyrosine-protein phosphatase DSP4 isoform X2 [Camellia sinensis]
VaccDscaff1-snap-gene-373.47	0.525169	0.14247	0.623888	0.607222	0.789404	0.884719	0.450001	0.980244	1.14732	1.17876	2.26883	2.69378	1.95087	1.74103	1.64665	1.67028	2.2624	2.3425	0.200932	0.650337	normal	0.0664959	0.993965	normal	2.46e-06	2.07115	up	1.49e-06	2.01369	up	7.51e-08	2.23687	up	--	Biological Process: reproduction (GO:0000003);; Cellular Component: ubiquitin ligase complex (GO:0000151);; Cellular Component: nuclear ubiquitin ligase complex (GO:0000152);; Biological Process: developmental process involved in reproduction (GO:0003006);; Molecular Function: molecular_function (GO:0003674);; Molecular Function: catalytic activity (GO:0003824);; Molecular Function: ubiquitin-pro…	K10143|1.9e-311|zju:107417151|K10143 E3 ubiquitin-protein ligase RFWD2 [EC:2.3.2.27] | (RefSeq) E3 ubiquitin-protein ligase COP1 isoform X1	--	WD domain, G-beta repeat	E3 ubiquitin-protein ligase COP1 OS=Arabidopsis thaliana OX=3702 GN=COP1 PE=1 SV=2	Signal transduction mechanisms	hypothetical protein C3L33_11879, partial [Rhododendron williamsianum]
VaccDscaff1-snap-gene-375.28	1.11494	0.74286	0.890675	0.741155	0.852756	1.08112	1.11698	1.49751	1.97187	2.07582	1.15142	2.43252	1.34529	1.72995	2.1429	1.90562	2.03915	1.83961	0.919728	0.0709023	normal	0.02163	0.856571	normal	0.0043053	1.07264	up	0.00370643	1.0223	up	0.000109962	1.17819	up	Translation, ribosomal structure and biogenesis	--	K00784|4.0e-156|oeu:111390323|K00784 ribonuclease Z [EC:3.1.26.11] | (RefSeq) tRNase Z TRZ2, chloroplastic isoform X1	--	Beta-lactamase superfamily domain	tRNase Z TRZ2, chloroplastic OS=Arabidopsis thaliana OX=3702 GN=TRZ2 PE=2 SV=1	Function unknown	hypothetical protein C3L33_11874, partial [Rhododendron williamsianum]
VaccDscaff1-snap-gene-388.26	4.03834	4.08428	3.67313	2.31959	2.1351	2.36665	1.81597	1.72814	1.37889	2.28514	2.27115	2.35338	2.71108	3.06081	3.83135	2.91269	3.059	2.96744	1.6e-07	-0.647213	normal	1.1e-12	-1.06068	down	2.3e-07	-0.633869	normal	0.470145	-0.137366	normal	0.0490618	-0.245408	normal	--	Biological Process: transcription-dependent tethering of RNA polymerase II gene DNA at nuclear periphery (GO:0000972);; Molecular Function: molecular_function (GO:0003674);; Molecular Function: structural molecule activity (GO:0005198);; Cellular Component: cellular_component (GO:0005575);; Cellular Component: intracellular (GO:0005622);; Cellular Component: cell (GO:0005623);; Cellular Component…	K14300|0.0e+00|vvi:100249432|K14300 nuclear pore complex protein Nup133 | (RefSeq) nuclear pore complex protein NUP133	--	Nup133 N terminal like	Nuclear pore complex protein NUP133 OS=Arabidopsis thaliana OX=3702 GN=NUP133 PE=1 SV=1	Function unknown	hypothetical protein C3L33_11791, partial [Rhododendron williamsianum]
VaccDscaff1-snap-gene-393.45	0.112549	0.089115	0.18684	0.155548	0.232262	0.207364	0.730827	0.460448	0.626962	0.231861	0.224307	0.152555	0.358458	0.213133	0.413344	0.277473	0.296128	0.206282	0.286587	0.543815	normal	1.35e-10	2.23358	up	0.165519	0.693577	normal	0.00214995	1.35989	up	0.0172495	1.0652	normal	Signal transduction mechanisms	Molecular Function: protein kinase activity (GO:0004672);; Molecular Function: ATP binding (GO:0005524);; Cellular Component: integral component of membrane (GO:0016021);;	K24104|2.5e-74|thj:104799061|K24104 GPN-loop GTPase | (RefSeq) LOW QUALITY PROTEIN: uncharacterized protein LOC104799061	--	Protein tyrosine and serine/threonine kinase	Probable LRR receptor-like serine/threonine-protein kinase At1g53440 OS=Arabidopsis thaliana OX=3702 GN=At1g53440 PE=2 SV=2	Signal transduction mechanisms	Armadillo [Macleaya cordata]
VaccDscaff1-snap-gene-4.39	0.891658	0.830562	0.701638	0.614285	0.233936	0.359424	0.379057	0.605278	0.312743	0.53706	0.338038	0.590262	0.274301	0.270282	0.435145	0.56187	0.647165	0.405822	0.0886448	-0.693642	normal	0.076519	-0.668412	normal	0.11522	-0.568232	normal	0.00225753	-1.08603	down	0.247848	-0.412832	normal	--	Molecular Function: RNA polymerase II transcription factor activity, sequence-specific DNA binding (GO:0000981);; Molecular Function: transcription factor activity, RNA polymerase II core promoter proximal region sequence-specific binding (GO:0000982);; Molecular Function: transcriptional activator activity, RNA polymerase II core promoter proximal region sequence-specific binding (GO:0001077);; …	K21596|0.0e+00|pper:18790164|K21596 calmodulin-binding transcription activator | (RefSeq) calmodulin-binding transcription activator 3 isoform X1	Function unknown	CG-1 domain	Calmodulin-binding transcription activator 3 OS=Arabidopsis thaliana OX=3702 GN=CAMTA3 PE=1 SV=1	Posttranslational modification, protein turnover, chaperones	hypothetical protein C3L33_13049, partial [Rhododendron williamsianum]
VaccDscaff1-snap-gene-4.44	0.774772	0.70975	0.733022	0.502557	0.428289	0.508516	0.31095	0.498388	0.261794	0.259119	0.306903	0.272378	0.47387	0.265975	0.427696	0.364039	0.291096	0.426982	0.047834	-0.467066	normal	0.00416184	-0.831241	normal	4.67e-08	-1.23171	down	0.00800673	-0.736025	normal	0.000290536	-0.854146	normal	--	Biological Process: mitotic cell cycle (GO:0000278);; Biological Process: mitotic cytokinesis (GO:0000281);; Biological Process: cytokinesis (GO:0000910);; Biological Process: cytokinesis by cell plate formation (GO:0000911);; Molecular Function: molecular_function (GO:0003674);; Molecular Function: motor activity (GO:0003774);; Molecular Function: microtubule motor activity (GO:0003777);; Molecu…	K10400|0.0e+00|vvi:100245872|K10400 kinesin family member 15 | (RefSeq) kinesin-like protein KIN-12C	--	Kinesin motor domain	Kinesin-like protein KIN-12C OS=Arabidopsis thaliana OX=3702 GN=KIN12C PE=1 SV=1	Cytoskeleton	hypothetical protein C3L33_13048, partial [Rhododendron williamsianum]
VaccDscaff1-snap-gene-401.23	0.864927	0.664568	0.892614	1.28453	0.893592	0.927382	0.774406	0.869507	0.718719	0.389357	0.463903	0.558629	0.182889	0.263775	0.181973	0.305065	0.413281	0.26046	0.237336	0.42771	normal	0.711908	0.140146	normal	0.0972156	-0.602925	normal	1.38e-05	-1.66481	down	0.00235832	-1.10049	down	--	Molecular Function: protein binding (GO:0005515);;	K13466|1.3e-13|dzi:111309432|K13466 EIX receptor 1/2 | (RefSeq) probable LRR receptor-like serine/threonine-protein kinase At4g36180	General function prediction only	Leucine rich repeat	Receptor-like protein 7 OS=Arabidopsis thaliana OX=3702 GN=RLP7 PE=3 SV=2	Signal transduction mechanisms	receptor-like protein 7 [Camellia sinensis]
VaccDscaff1-snap-gene-405.35	1.21933	2.49405	1.80442	2.74427	2.96046	2.27941	3.44265	1.80266	3.05691	1.89237	2.08851	1.5495	3.31837	3.17049	1.84773	3.39076	3.27947	3.41488	0.0500613	0.593931	normal	0.024919	0.739489	normal	0.73663	0.136271	normal	0.0285758	0.736132	normal	9.81e-05	1.001	up	Defense mechanisms	Molecular Function: nucleotide binding (GO:0000166);; Molecular Function: molecular_function (GO:0003674);; Molecular Function: catalytic activity (GO:0003824);; Molecular Function: nucleotide diphosphatase activity (GO:0004551);; Molecular Function: binding (GO:0005488);; Cellular Component: cellular_component (GO:0005575);; Cellular Component: intracellular (GO:0005622);; Cellular Component: ce…	K22763|3.5e-38|lja:Lj2g3v1989220.3|K22763 deubiquitinase DESI2 [EC:3.4.19.12] | (RefSeq) Lj2g3v1989220.3; -	Signal transduction mechanisms	Nudix hydrolase domain	Nudix hydrolase 10 OS=Arabidopsis thaliana OX=3702 GN=NUDT10 PE=1 SV=1	Signal transduction mechanisms	hypothetical protein C3L33_11752, partial [Rhododendron williamsianum]
VaccDscaff1-snap-gene-408.47	2.98909	3.47213	3.56022	3.29018	3.1234	2.7606	6.69867	7.88255	8.21442	4.71568	4.79691	5.25722	4.08824	3.68092	4.08208	5.8123	5.36225	5.05222	0.997259	-0.00155509	normal	7.44e-18	1.35117	up	0.000139302	0.679497	normal	0.0504412	0.397758	normal	5.69e-07	0.839871	normal	General function prediction only	--	--	--	--	Pathogen-related protein OS=Hordeum vulgare OX=4513 PE=2 SV=2	Function unknown	hypothetical protein EZV62_007997 [Acer yangbiense]
VaccDscaff1-snap-gene-417.35	7.73311	8.78044	7.77097	8.51412	8.55075	8.68279	4.47856	4.81968	5.61461	3.5949	4.57741	3.1982	2.94408	2.46635	4.28176	3.46696	3.19577	2.99703	0.368695	0.202688	normal	0.00999917	-0.504992	normal	2.59e-05	-0.926744	normal	2.36e-06	-1.13742	down	1.45e-09	-1.15342	down	--	--	--	--	VQ motif	VQ motif-containing protein 4 OS=Arabidopsis thaliana OX=3702 GN=VQ4 PE=1 SV=1	Function unknown	VQ motif-containing protein [Actinidia chinensis var. chinensis]
VaccDscaff1-snap-gene-422.52	0.198341	0.172719	0.236272	1.27936	0.291379	0.461084	1.41944	0.257121	1.47407	1.29624	1.4937	2.11234	1.4228	0.698175	0.347192	1.26988	0.26371	1.19457	--	--	--	--	--	--	8.15e-08	2.56001	up	--	--	--	--	--	--	--	--	--	--	--	--	--	Hepatitis A virus cellular receptor 1 like [Actinidia chinensis var. chinensis]
VaccDscaff1-snap-gene-427.41	1.31585	2.17708	1.65205	2.89777	2.70423	2.94467	1.49398	1.40264	1.87396	0.684081	0.569658	0.752521	0.746365	0.885553	0.840446	0.351264	0.595764	0.60645	0.000368314	0.800295	normal	0.829453	0.0777986	normal	5.56e-05	-1.16089	down	0.00350849	-0.860101	normal	4.97e-06	-1.49297	down	Signal transduction mechanisms	Molecular Function: protein serine/threonine kinase activity (GO:0004674);; Molecular Function: ATP binding (GO:0005524);; Cellular Component: integral component of membrane (GO:0016021);; Biological Process: recognition of pollen (GO:0048544);;	K24104|1.7e-75|thj:104799061|K24104 GPN-loop GTPase | (RefSeq) LOW QUALITY PROTEIN: uncharacterized protein LOC104799061	--	Protein tyrosine and serine/threonine kinase	G-type lectin S-receptor-like serine/threonine-protein kinase At4g27290 OS=Arabidopsis thaliana OX=3702 GN=At4g27290 PE=3 SV=4	Signal transduction mechanisms	LOW QUALITY PROTEIN: uncharacterized protein LOC114287443 [Camellia sinensis]
VaccDscaff1-snap-gene-43.41	2.15259	1.54044	1.40821	3.21844	3.86159	3.21889	3.95878	3.62185	4.33586	1.95061	1.50986	2.06733	1.8563	1.07915	1.8822	0.391958	0.815768	0.735296	0.000419195	1.00124	up	5.65e-07	1.34657	up	0.589093	0.235376	normal	0.882941	0.0776571	normal	0.01157	-1.13103	normal	--	Cellular Component: plasma membrane (GO:0005886);; Cellular Component: integral component of membrane (GO:0016021);;	--	--	Domain of unknown function (DUF588)	CASP-like protein 1E2 OS=Vitis vinifera OX=29760 GN=VIT_05s0020g01820 PE=2 SV=1	Function unknown	CASP-like protein [Actinidia chinensis var. chinensis]
VaccDscaff1-snap-gene-432.37	1.01553	0.480772	0.287252	1.40944	1.61836	1.70935	1.03517	0.821984	0.673138	1.13732	1.2209	0.679571	1.15116	0.695044	1.31305	0.724485	1.58053	0.546598	0.00446335	1.13783	up	0.2887	0.599237	normal	0.160155	0.767953	normal	0.114055	0.866749	normal	0.251068	0.722068	normal	Carbohydrate transport and metabolism	Molecular Function: hydrolase activity, hydrolyzing O-glycosyl compounds (GO:0004553);; Biological Process: carbohydrate metabolic process (GO:0005975);;	K01188|2.5e-221|hbr:110643129|K01188 beta-glucosidase [EC:3.2.1.21] | (RefSeq) putative beta-glucosidase 41 isoform X1	Carbohydrate transport and metabolism	Glycosyl hydrolase family 1	Putative beta-glucosidase 41 OS=Arabidopsis thaliana OX=3702 GN=BGLU41 PE=3 SV=2	Carbohydrate transport and metabolism	Beta-glucosidase [Actinidia chinensis var. chinensis]
VaccDscaff1-snap-gene-436.35	2.41238	2.28004	2.03912	1.73571	1.57285	1.33148	0.76203	0.800601	0.909292	1.13044	0.998847	0.8717	0.553695	0.505497	0.607715	0.672038	0.795835	0.698774	0.0372288	-0.396592	normal	1.13e-14	-1.24027	down	9.14e-10	-1.01243	down	6.84e-25	-1.82795	down	1.12e-18	-1.46247	down	Transcription	Molecular Function: ADP binding (GO:0043531);;	K13459|1.9e-127|vvi:104880791|K13459 disease resistance protein RPS2 | (RefSeq) probable disease resistance protein At4g27220	Signal transduction mechanisms	NB-ARC domain	Disease resistance protein At4g27190 OS=Arabidopsis thaliana OX=3702 GN=At4g27190 PE=2 SV=1	Signal transduction mechanisms	hypothetical protein HYC85_012180 [Camellia sinensis]
VaccDscaff1-snap-gene-440.35	0.582553	1.15237	0.748248	0.897066	0.832063	0.73269	1.37338	1.04684	1.05605	1.4609	2.30667	2.26868	0.593126	1.00186	2.97397	1.08211	0.663836	1.38626	0.893668	0.0894246	normal	0.0890969	0.632135	normal	6.72e-05	1.32442	up	0.0938641	0.905936	normal	0.306286	0.465711	normal	Energy production and conversion	Molecular Function: molecular_function (GO:0003674);; Cellular Component: cellular_component (GO:0005575);; Cellular Component: intracellular (GO:0005622);; Cellular Component: cell (GO:0005623);; Cellular Component: cytoplasm (GO:0005737);; Biological Process: generation of precursor metabolites and energy (GO:0006091);; Biological Process: nucleobase-containing compound metabolic process (GO:00…	K02115|1.3e-131|gmx:100797290|K02115 F-type H+-transporting ATPase subunit gamma | (RefSeq) ATP synthase gamma chain, chloroplastic	Energy production and conversion	ATP synthase	ATP synthase gamma chain, chloroplastic OS=Spinacia oleracea OX=3562 GN=ATPC PE=1 SV=2	Energy production and conversion	hypothetical protein C3L33_11577, partial [Rhododendron williamsianum]
VaccDscaff1-snap-gene-443.43	6.70332	6.02836	4.74012	5.56862	4.41781	4.77428	6.35587	7.07584	6.16908	8.46212	7.87231	7.68369	11.2196	11.1256	11.7764	13.9183	15.0613	13.9842	0.748449	-0.10994	normal	0.0757767	0.345658	normal	0.000769135	0.581457	normal	1.11e-12	1.11264	up	3.75e-23	1.43739	up	Posttranslational modification, protein turnover, chaperones	Molecular Function: nucleotide binding (GO:0000166);; Molecular Function: adenyl-nucleotide exchange factor activity (GO:0000774);; Cellular Component: presequence translocase-associated import motor (GO:0001405);; Molecular Function: molecular_function (GO:0003674);; Molecular Function: binding (GO:0005488);; Molecular Function: copper ion binding (GO:0005507);; Molecular Function: protein bindi…	K03687|1.0e-83|vvi:100252150|K03687 molecular chaperone GrpE | (RefSeq) protein GrpE	Posttranslational modification, protein turnover, chaperones	GrpE	GrpE protein homolog 2, mitochondrial OS=Arabidopsis thaliana OX=3702 GN=Mge2 PE=1 SV=1	Posttranslational modification, protein turnover, chaperones	grpE protein homolog 2, mitochondrial-like [Camellia sinensis]
VaccDscaff1-snap-gene-447.46	0.421076	0.947309	0.38096	0.602845	0.479665	0.676521	1.59268	1.60347	1.61682	1.47908	1.38911	0.775976	1.49191	2.08294	2.17051	2.3622	2.41555	1.81286	--	--	--	0.00310061	1.39681	up	--	--	--	0.000605224	1.6399	up	4.65e-05	1.83714	up	--	Molecular Function: molecular_function (GO:0003674);; Molecular Function: catalytic activity (GO:0003824);; Biological Process: multicellular organism development (GO:0007275);; Biological Process: aging (GO:0007568);; Biological Process: biological_process (GO:0008150);; Biological Process: metabolic process (GO:0008152);; Biological Process: leaf senescence (GO:0010150);; Molecular Function: ox…	--	Secondary metabolites biosynthesis, transport and catabolism;; General function prediction only	--	--	Secondary metabolites biosynthesis, transport and catabolism	hypothetical protein C3L33_11537, partial [Rhododendron williamsianum]
VaccDscaff1-snap-gene-45.29	172.691	166.126	161.901	243.478	253.974	253.191	135.637	125.941	132.367	56.8251	47.5495	50.0195	47.0031	38.9001	52.2481	36.1689	33.4686	35.7193	2.61e-35	0.705238	normal	0.0218009	-0.160679	normal	6.44e-104	-1.5604	down	2.78e-64	-1.69053	down	1.36e-243	-2.09036	down	--	Molecular Function: peroxidase activity (GO:0004601);; Cellular Component: extracellular region (GO:0005576);; Biological Process: response to oxidative stress (GO:0006979);; Molecular Function: heme binding (GO:0020037);; Biological Process: hydrogen peroxide catabolic process (GO:0042744);; Molecular Function: metal ion binding (GO:0046872);;	K00430|1.3e-130|oeu:111375802|K00430 peroxidase [EC:1.11.1.7] | (RefSeq) peroxidase 3-like	--	Peroxidase	Peroxidase 3 OS=Arabidopsis thaliana OX=3702 GN=PER3 PE=2 SV=1	Secondary metabolites biosynthesis, transport and catabolism	hypothetical protein HYC85_013017 [Camellia sinensis]
VaccDscaff1-snap-gene-453.37	17.325	19.5733	12.045	12.5675	23.3285	20.0413	32.7441	33.0527	27.8363	7.98215	5.53193	10.8334	4.43201	9.08904	15.1711	1.48784	8.23093	7.21807	0.33864	0.299376	normal	1.53e-12	1.10822	up	0.000552845	-0.845949	normal	0.347695	-0.546509	normal	0.098993	-1.12442	normal	Coenzyme transport and metabolism	Biological Process: isoprenoid biosynthetic process (GO:0008299);; Molecular Function: transferase activity, transferring alkyl or aryl (other than methyl) groups (GO:0016765);;	K00787|1.9e-171|adu:107483040|K00787 farnesyl diphosphate synthase [EC:2.5.1.1 2.5.1.10] | (RefSeq) farnesyl pyrophosphate synthase 1 isoform X1	Coenzyme transport and metabolism	Polyprenyl synthetase	Farnesyl pyrophosphate synthase OS=Panax ginseng OX=4054 GN=FPS PE=2 SV=1	Coenzyme transport and metabolism	farnesyl pyrophosphate synthase 1 isoform X1 [Camellia sinensis]
VaccDscaff1-snap-gene-454.40	0.394316	0.309978	0.466956	0.334355	0.348827	0.322521	0.111635	0.178858	0.099679	0.085761	0.132155	0.130026	0.103234	0.094871	0.151513	0.145342	0.06263	0.121967	0.912918	-0.0742553	normal	0.00628249	-1.2315	down	0.00128284	-1.4331	down	0.00249601	-1.40281	down	0.00174567	-1.47899	down	--	Molecular Function: microtubule motor activity (GO:0003777);; Molecular Function: ATP binding (GO:0005524);; Biological Process: microtubule-based movement (GO:0007018);; Molecular Function: microtubule binding (GO:0008017);;	K10406|0.0e+00|vvi:100241162|K10406 kinesin family member C2/C3 | (RefSeq) kinesin-like protein KIN-14F	Cytoskeleton	Kinesin motor domain	Kinesin-like protein KIN-14F OS=Arabidopsis thaliana OX=3702 GN=KIN14F PE=1 SV=2	Cytoskeleton	Kinesin-like protein [Actinidia chinensis var. chinensis]
VaccDscaff1-snap-gene-458.22	2.54677	2.00159	1.29806	1.55034	1.76836	1.98643	1.83858	1.95905	1.49483	2.25867	3.57415	3.43694	3.25372	4.66304	3.3699	4.80123	5.27755	5.18761	0.982393	-0.0158479	normal	0.944216	0.0313591	normal	0.0211852	0.755236	normal	0.000280842	1.06672	up	5.7e-10	1.4949	up	Coenzyme transport and metabolism	Cellular Component: cellular_component (GO:0005575);; Cellular Component: intracellular (GO:0005622);; Cellular Component: cell (GO:0005623);; Cellular Component: cytoplasm (GO:0005737);; Cellular Component: mitochondrion (GO:0005739);; Cellular Component: mitochondrial envelope (GO:0005740);; Cellular Component: mitochondrial inner membrane (GO:0005743);; Biological Process: heme a biosynthetic …	K02259|2.6e-137|nto:104120308|K02259 cytochrome c oxidase assembly protein subunit 15 | (RefSeq) cytochrome c oxidase assembly protein COX15 isoform X1	Posttranslational modification, protein turnover, chaperones	Cytochrome oxidase assembly protein	Cytochrome c oxidase assembly protein COX15 OS=Arabidopsis thaliana OX=3702 GN=COX15 PE=2 SV=1	Posttranslational modification, protein turnover, chaperones	hypothetical protein C3L33_11487, partial [Rhododendron williamsianum]
VaccDscaff1-snap-gene-459.39	14.2795	14.6565	14.7641	10.636	11.4747	9.90798	5.07806	6.73654	5.46455	10.1158	7.29178	9.03946	10.1865	8.58921	9.52594	16.4711	18.6024	17.2111	0.000416602	-0.321041	normal	4.99e-27	-1.14722	down	4.93e-08	-0.591757	normal	6.11e-07	-0.463608	normal	1.39e-07	0.411212	normal	--	Cellular Component: proteasome complex (GO:0000502);; Molecular Function: peptidase activator activity (GO:0016504);; Molecular Function: lysine-acetylated histone binding (GO:0070577);; Molecular Function: proteasome binding (GO:0070628);;	K06699|0.0e+00|vvi:100263530|K06699 proteasome activator subunit 4 | (RefSeq) proteasome activator subunit 4	Function unknown	Proteasome-substrate-size regulator, mid region	Proteasome activator subunit 4 OS=Arabidopsis thaliana OX=3702 GN=PA200 PE=2 SV=2	Carbohydrate transport and metabolism	proteasome activator subunit 4 [Camellia sinensis]
VaccDscaff1-snap-gene-460.39	24.7723	24.6045	22.8118	26.923	25.8456	28.0945	14.9475	15.4896	15.7329	13.1291	12.966	12.0761	10.1322	9.38658	10.7416	10.4786	9.61278	11.4242	0.00711864	0.285143	normal	7.11e-06	-0.456792	normal	4.59e-13	-0.779842	normal	9.59e-21	-1.08544	down	1.48e-19	-1.03357	down	--	Biological Process: reproduction (GO:0000003);; Biological Process: developmental process involved in reproduction (GO:0003006);; Cellular Component: cellular_component (GO:0005575);; Cellular Component: cell (GO:0005623);; Cellular Component: plasma membrane (GO:0005886);; Biological Process: chemotaxis (GO:0006935);; Biological Process: biological_process (GO:0008150);; Biological Process: cell…	K11584|1.4e-28|dcr:108200982|K11584 serine/threonine-protein phosphatase 2A regulatory subunit B' | (RefSeq) serine/threonine protein phosphatase 2A 57 kDa regulatory subunit B' beta isoform-like	--	--	GPI-anchored protein LLG1 OS=Arabidopsis thaliana OX=3702 GN=LLG1 PE=1 SV=1	Function unknown	GPI-anchored protein LLG1-like isoform X1 [Camellia sinensis]
VaccDscaff1-snap-gene-461.82	1.08275	1.18067	1.13583	0.598219	0.53032	0.270349	0.903456	1.18719	0.88197	1.38471	0.957395	1.18459	1.7219	2.10504	2.67806	2.55177	2.24516	2.35133	0.00728292	-0.954029	normal	0.983793	-0.00830877	normal	0.612752	0.175257	normal	2.16e-05	1.05912	up	1.74e-09	1.20215	up	--	Molecular Function: protein binding (GO:0005515);;	--	--	BTB/POZ domain	BTB/POZ domain-containing protein At1g04390 OS=Arabidopsis thaliana OX=3702 GN=At1g04390 PE=2 SV=3	Function unknown	hypothetical protein C3L33_11459, partial [Rhododendron williamsianum]
VaccDscaff1-snap-gene-48.43	0.996761	1.01483	1.05185	2.30484	2.5925	2.8796	1.63765	1.46311	2.60295	1.50508	1.2953	1.34392	0.892957	0.951082	1.23878	0.885029	0.874971	0.548136	0.000265116	1.20252	up	0.0224887	0.977167	normal	0.277275	0.512748	normal	--	--	--	--	--	--	--	Molecular Function: molecular_function (GO:0003674);; Molecular Function: catalytic activity (GO:0003824);; Molecular Function: ubiquitin-protein transferase activity (GO:0004842);; Molecular Function: protein binding (GO:0005515);; Cellular Component: cellular_component (GO:0005575);; Cellular Component: intracellular (GO:0005622);; Cellular Component: cell (GO:0005623);; Cellular Component: cyt…	K10268|3.8e-12|ccaj:109811172|K10268 F-box and leucine-rich repeat protein 2/20 | (RefSeq) F-box protein SKIP2	General function prediction only	F-box-like	F-box protein At1g47056 OS=Arabidopsis thaliana OX=3702 GN=At1g47056 PE=2 SV=1	Function unknown	hypothetical protein [Turnera subulata]
VaccDscaff1-snap-gene-55.40	1.60116	0.958038	0.829349	1.18117	1.51024	1.35295	3.14396	1.9312	2.1751	3.63031	1.42183	4.67746	2.19917	1.92779	4.51246	4.99962	4.07062	4.01655	0.507345	0.318085	normal	0.000327495	1.2017	up	0.000196488	1.48312	up	0.000224256	1.40059	up	2.62e-14	2.0309	up	Secondary metabolites biosynthesis, transport and catabolism	Molecular Function: hydrolase activity (GO:0016787);;	K09651|6.5e-14|boe:106315955|K09651 rhomboid domain-containing protein 1 [EC:3.4.21.-] | (RefSeq) rhomboid-like protein 14, mitochondrial isoform X1	General function prediction only	Dienelactone hydrolase family	Endo-1,3;1,4-beta-D-glucanase OS=Zea mays OX=4577 PE=1 SV=1	Secondary metabolites biosynthesis, transport and catabolism	unnamed protein product [Microthlaspi erraticum]
VaccDscaff1-snap-gene-55.43	14.1196	16.0632	17.8594	20.4918	18.8078	18.6803	23.339	23.9414	26.5757	46.3871	45.9766	40.735	47.3845	45.8288	50.4966	56.6368	50.3768	57.5957	0.00594953	0.386506	normal	5.59e-11	0.797685	normal	1.1e-43	1.58904	up	5.67e-55	1.73052	up	3.25e-70	1.91962	up	--	Molecular Function: hydrolase activity (GO:0016787);;	K09651|1.8e-15|boe:106315955|K09651 rhomboid domain-containing protein 1 [EC:3.4.21.-] | (RefSeq) rhomboid-like protein 14, mitochondrial isoform X1	General function prediction only	Dienelactone hydrolase family	Endo-1,3;1,4-beta-D-glucanase OS=Zea mays OX=4577 PE=1 SV=1	Secondary metabolites biosynthesis, transport and catabolism	unnamed protein product [Microthlaspi erraticum]
VaccDscaff1-snap-gene-64.22	3.2416	2.24388	3.61839	2.09961	1.91713	2.88152	3.02343	1.62736	1.34823	2.14904	1.8012	1.34649	1.39107	1.1005	1.45904	1.21183	1.16225	1.30169	0.586782	-0.240263	normal	0.354396	-0.389053	normal	0.0651304	-0.611844	normal	0.00150322	-0.997549	normal	0.000212842	-1.11385	down	--	--	--	General function prediction only	Protein of unknown function (DUF1749)	--	Function unknown	hypothetical protein C3L33_12763, partial [Rhododendron williamsianum]
VaccDscaff1-snap-gene-68.37	2.14538	0.717873	1.0247	1.85712	1.96971	1.14519	1.08943	1.77134	0.342558	0.248527	0.214088	0.657036	0.819221	1.01939	1.08924	0.088532	0.224384	0.106063	0.524664	0.358056	normal	0.909579	-0.0852556	normal	0.0121183	-1.35637	normal	0.682071	-0.23671	normal	1.61e-06	-2.60672	down	Amino acid transport and metabolism	Biological Process: polyamine biosynthetic process (GO:0006596);; Molecular Function: transferase activity (GO:0016740);;	K18787|7.8e-170|qsu:112037415|K18787 thermospermine synthase [EC:2.5.1.79] | (RefSeq) thermospermine synthase ACAULIS5-like	Amino acid transport and metabolism	Spermine/spermidine synthase domain	Thermospermine synthase ACAULIS5 OS=Arabidopsis thaliana OX=3702 GN=ACL5 PE=1 SV=1	Amino acid transport and metabolism	hypothetical protein F0562_000317 [Nyssa sinensis]
VaccDscaff1-snap-gene-69.31	1.07528	0.78831	0.687562	1.27723	0.608882	0.886905	1.26167	1.08704	1.63916	0.547001	0.653428	0.395314	0.58825	0.424279	0.524757	0.201001	0.115251	0.386801	0.763999	0.195963	normal	0.0528957	0.760477	normal	0.361605	-0.474831	normal	0.327223	-0.509	normal	0.00893072	-1.44372	down	--	Molecular Function: transferase activity, transferring acyl groups other than amino-acyl groups (GO:0016747);;	K19861|2.4e-182|zju:107432782|K19861 benzyl alcohol O-benzoyltransferase [EC:2.3.1.196 2.3.1.232] | (RefSeq) benzyl alcohol O-benzoyltransferase-like	--	Transferase family	Benzyl alcohol O-benzoyltransferase OS=Nicotiana tabacum OX=4097 GN=HSR201 PE=1 SV=1	Function unknown	Benzyl alcohol O-benzoyltransferase [Actinidia chinensis var. chinensis]
VaccDscaff1-snap-gene-86.38	13.7523	15.6518	13.9197	12.3603	13.5597	13.0713	27.8461	27.8852	28.6137	38.3654	35.1177	36.8709	42.6886	38.3251	42.6676	41.702	40.7068	43.5199	0.89124	-0.0262218	normal	3.86e-60	1.14312	up	4.09e-97	1.47652	up	8.99e-95	1.66951	up	3.64e-131	1.68998	up	General function prediction only	--	K01456|8.6e-130|pper:18774423|K01456 peptide-N4-(N-acetyl-beta-glucosaminyl)asparagine amidase [EC:3.5.1.52] | (RefSeq) peptide-N(4)-(N-acetyl-beta- glucosaminyl)asparagine amidase isoform X1	Energy production and conversion	Aldo/keto reductase family	Perakine reductase OS=Rauvolfia serpentina OX=4060 GN=PR PE=1 SV=1	Energy production and conversion	hypothetical protein TEA_007760 [Camellia sinensis var. sinensis]
VaccDscaff10-augustus-gene-0.23	0.782318	0.849608	0.713061	1.24417	1.34674	1.34955	1.50474	1.35177	1.55425	1.02337	1.21897	0.99162	1.15678	1.31425	1.21694	0.770912	0.721924	0.873613	0.0472625	0.72755	normal	0.00280325	1.01914	up	0.192197	0.550157	normal	0.0509546	0.761172	normal	0.762695	0.157034	normal	Signal transduction mechanisms	Molecular Function: molecular_function (GO:0003674);; Molecular Function: catalytic activity (GO:0003824);; Molecular Function: protein kinase activity (GO:0004672);; Molecular Function: protein serine/threonine kinase activity (GO:0004674);; Molecular Function: ATP binding (GO:0005524);; Cellular Component: cellular_component (GO:0005575);; Cellular Component: intracellular (GO:0005622);; Cellul…	K08867|5.3e-146|cam:101501137|K08867 WNK lysine deficient protein kinase [EC:2.7.11.1] | (RefSeq) probable serine/threonine-protein kinase WNK11	General function prediction only	Protein kinase domain	Probable serine/threonine-protein kinase WNK11 OS=Arabidopsis thaliana OX=3702 GN=WNK11 PE=2 SV=1	Signal transduction mechanisms	hypothetical protein C3L33_11540, partial [Rhododendron williamsianum]
VaccDscaff10-augustus-gene-1.22	6.03502	5.74606	5.60933	7.2237	6.16676	7.41037	4.03969	4.17271	5.10239	3.10586	3.4131	2.13724	2.03418	1.82883	2.59462	1.66146	1.28412	1.58967	0.0197462	0.37439	normal	0.299594	-0.196917	normal	5.6e-05	-0.845145	normal	2.12e-11	-1.2523	down	1.15e-22	-1.75451	down	--	--	--	--	--	--	Function unknown	hypothetical protein HYC85_023697 [Camellia sinensis]
VaccDscaff10-augustus-gene-1.25	33.3531	36.7075	32.8828	45.1656	41.8877	45.9617	16.2208	23.0814	27.6838	10.4715	10.1228	9.98171	8.87877	8.35812	10.3818	7.7143	8.50235	7.04532	4.15e-13	0.491832	normal	0.00957911	-0.430493	normal	2.5e-103	-1.61177	down	4.43e-75	-1.73029	down	1.45e-105	-1.98556	down	Function unknown	Biological Process: cell morphogenesis (GO:0000902);; Biological Process: cell morphogenesis involved in differentiation (GO:0000904);; Molecular Function: molecular_function (GO:0003674);; Molecular Function: catalytic activity (GO:0003824);; Molecular Function: binding (GO:0005488);; Molecular Function: calcium ion binding (GO:0005509);; Cellular Component: cellular_component (GO:0005575);; Cel…	K01126|2.5e-19|hbr:110650283|K01126 glycerophosphoryl diester phosphodiesterase [EC:3.1.4.46] | (RefSeq) glycerophosphodiester phosphodiesterase GDPD6-like isoform X1	Energy production and conversion	Glycerophosphoryl diester phosphodiesterase family	Glycerophosphodiester phosphodiesterase GDPDL3 OS=Arabidopsis thaliana OX=3702 GN=GDPDL3 PE=2 SV=3	Energy production and conversion	hypothetical protein C3L33_11546, partial [Rhododendron williamsianum]
VaccDscaff10-augustus-gene-106.32	21.788	24.6666	20.1665	33.1008	36.0012	33.2858	41.08	35.9439	45.3083	18.2507	15.4741	16.4086	7.90774	6.69819	8.28779	3.5373	3.32572	3.51325	2.16e-14	0.73485	normal	6.11e-22	1.05531	up	0.0217051	-0.275401	normal	8.19e-27	-1.3682	down	1.11e-89	-2.50786	down	--	Molecular Function: peroxidase activity (GO:0004601);; Cellular Component: cellular_component (GO:0005575);; Cellular Component: extracellular region (GO:0005576);; Cellular Component: cell wall (GO:0005618);; Cellular Component: intracellular (GO:0005622);; Cellular Component: cell (GO:0005623);; Cellular Component: cytoplasm (GO:0005737);; Cellular Component: Golgi apparatus (GO:0005794);; Cell…	K00430|4.3e-133|vvi:100264421|K00430 peroxidase [EC:1.11.1.7] | (RefSeq) peroxidase P7	--	Peroxidase	Peroxidase 52 OS=Arabidopsis thaliana OX=3702 GN=PER52 PE=2 SV=1	Secondary metabolites biosynthesis, transport and catabolism	hypothetical protein C3L33_12055, partial [Rhododendron williamsianum]
VaccDscaff10-augustus-gene-11.27	23.4038	26.9452	25.819	21.5258	22.4522	22.7528	12.9382	14.5672	12.14	13.4323	13.5072	15.2352	12.0336	10.5924	10.8888	18.9528	17.3816	18.6919	0.704475	-0.0647021	normal	1.02e-11	-0.75116	normal	6.94e-11	-0.714996	normal	3.88e-19	-1.01457	down	0.00189076	-0.313189	normal	Coenzyme transport and metabolism	Molecular Function: molecular_function (GO:0003674);; Molecular Function: binding (GO:0005488);; Molecular Function: iron ion binding (GO:0005506);; Cellular Component: cellular_component (GO:0005575);; Cellular Component: intracellular (GO:0005622);; Cellular Component: cell (GO:0005623);; Cellular Component: cytoplasm (GO:0005737);; Cellular Component: cytosol (GO:0005829);; Biological Process:…	K03146|5.4e-166|cit:102626594|K03146 cysteine-dependent adenosine diphosphate thiazole synthase [EC:2.4.2.60] | (RefSeq) thiamine thiazole synthase, chloroplastic	General function prediction only	Thi4 family	Thiamine thiazole synthase, chloroplastic OS=Citrus sinensis OX=2711 GN=THI1 PE=2 SV=1	Coenzyme transport and metabolism	hypothetical protein C3L33_11612, partial [Rhododendron williamsianum]
VaccDscaff10-augustus-gene-110.29	12.5404	13.0946	12.6522	13.7933	15.367	15.7541	22.2845	22.804	21.9083	25.8534	24.956	24.2592	30.824	30.8616	30.9082	24.8699	23.0188	24.2213	0.00418655	0.348203	normal	6.27e-31	0.987763	normal	6.06e-37	1.09873	up	5.8e-60	1.43009	up	3.96e-36	1.06397	up	--	Cellular Component: cellular_component (GO:0005575);; Cellular Component: intracellular (GO:0005622);; Cellular Component: cell (GO:0005623);; Cellular Component: cytoplasm (GO:0005737);; Biological Process: sulfur compound metabolic process (GO:0006790);; Biological Process: biological_process (GO:0008150);; Biological Process: metabolic process (GO:0008152);; Molecular Function: methyltransfera…	K22746|1.6e-101|vvi:100263292|K22746 anamorsin | (RefSeq) anamorsin homolog	Function unknown	Cytokine-induced anti-apoptosis inhibitor 1, Fe-S biogenesis	Anamorsin homolog OS=Vitis vinifera OX=29760 GN=VIT_01s0010g01180 PE=3 SV=1	Translation, ribosomal structure and biogenesis	hypothetical protein C3L33_12064, partial [Rhododendron williamsianum]
VaccDscaff10-augustus-gene-113.26	72.3905	71.8483	69.1928	97.3737	97.9632	97.8052	191.543	196.986	187.626	150.785	158.239	157.38	158.369	158.844	156.327	131.729	132.178	127.938	7.38e-28	0.579944	normal	1.47e-216	1.61486	up	2.12e-83	1.25805	up	1.35e-96	1.30904	up	2.88e-92	1.02895	up	--	Molecular Function: UDP-glycosyltransferase activity (GO:0008194);;	K22950|4.7e-107|fve:101295404|K22950 acylphloroglucinol glucosyltransferase [EC:2.4.1.358] | (RefSeq) anthocyanidin 3-O-glucosyltransferase 2-like	Carbohydrate transport and metabolism;; Energy production and conversion	UDP-glucoronosyl and UDP-glucosyl transferase	Putative UDP-glucose flavonoid 3-O-glucosyltransferase 3 OS=Fragaria ananassa OX=3747 GN=GT3 PE=2 SV=1	--	hypothetical protein HYC85_012329 [Camellia sinensis]
VaccDscaff10-augustus-gene-113.29	13.9385	11.7999	12.3604	17.9733	18.089	19.9519	37.9446	37.0144	34.4323	31.595	33.0159	35.8011	35.0942	31.7283	34.6444	26.5276	27.3192	25.3376	5.09e-09	0.667053	normal	1.76e-67	1.69596	up	1.99e-45	1.5191	up	4.68e-51	1.56498	up	5.1e-33	1.20282	up	--	Molecular Function: UDP-glycosyltransferase activity (GO:0008194);;	K22950|3.1e-103|fve:101295404|K22950 acylphloroglucinol glucosyltransferase [EC:2.4.1.358] | (RefSeq) anthocyanidin 3-O-glucosyltransferase 2-like	Carbohydrate transport and metabolism;; Energy production and conversion	UDP-glucoronosyl and UDP-glucosyl transferase	Putative UDP-glucose flavonoid 3-O-glucosyltransferase 3 OS=Fragaria ananassa OX=3747 GN=GT3 PE=2 SV=1	--	anthocyanidin 3-O-glucosyltransferase 2-like [Camellia sinensis]
VaccDscaff10-augustus-gene-113.31	31.9123	32.852	35.257	32.0804	35.1582	32.6093	66.6755	62.1309	62.6451	74.7849	78.7927	76.9544	70.492	75.03	67.4949	54.4662	52.1214	50.0539	0.379736	0.119959	normal	1.41e-45	1.1172	up	3.07e-58	1.33193	up	1.64e-40	1.24763	up	1e-23	0.798149	normal	--	Molecular Function: UDP-glycosyltransferase activity (GO:0008194);;	K22950|2.2e-109|fve:101295404|K22950 acylphloroglucinol glucosyltransferase [EC:2.4.1.358] | (RefSeq) anthocyanidin 3-O-glucosyltransferase 2-like	Carbohydrate transport and metabolism;; Energy production and conversion	UDP-glucoronosyl and UDP-glucosyl transferase	Putative UDP-glucose flavonoid 3-O-glucosyltransferase 3 OS=Fragaria ananassa OX=3747 GN=GT3 PE=2 SV=1	--	hypothetical protein HYC85_012329 [Camellia sinensis]
VaccDscaff10-augustus-gene-117.28	2.67597	3.0281	2.515	1.36287	1.19627	1.419	0.826327	0.999036	0.570787	1.03891	1.48041	1.29554	1.03669	0.7339	0.425645	0.28193	0.921802	0.83204	0.00021575	-0.845316	normal	2.81e-08	-1.52286	down	0.000272448	-0.93652	normal	8.97e-07	-1.6251	down	4.99e-06	-1.74558	down	--	Biological Process: regulation of transcription, DNA-templated (GO:0006355);; Molecular Function: zinc ion binding (GO:0008270);; Molecular Function: sequence-specific DNA binding (GO:0043565);;	K21630|2.6e-28|cmax:111478040|K21630 GATA-type zinc finger protein 1 | (RefSeq) GATA transcription factor 6-like	Transcription	GATA zinc finger	GATA transcription factor 12 OS=Arabidopsis thaliana OX=3702 GN=GATA12 PE=2 SV=1	Transcription	hypothetical protein C3L33_12100, partial [Rhododendron williamsianum]
VaccDscaff10-augustus-gene-119.33	4.6749	3.36257	2.18741	8.42778	8.07306	7.18339	2.71183	4.01318	3.91036	2.01965	1.39695	1.52666	2.02985	1.67034	1.72344	0.973283	1.15918	0.730694	0.000265152	1.13473	up	0.663784	0.222269	normal	0.0984693	-0.788002	normal	0.172027	-0.675626	normal	0.002119	-1.50125	down	--	--	--	--	--	--	--	hypothetical protein C3L33_12108, partial [Rhododendron williamsianum]
VaccDscaff10-augustus-gene-119.40	2.03618	1.66716	2.34521	2.59935	2.88811	2.91093	1.51221	1.13336	1.67314	0.800841	0.585208	0.684851	0.726456	0.865595	0.812707	0.432402	0.408957	0.603764	0.0202696	0.557331	normal	0.351144	-0.294262	normal	1.07e-06	-1.34399	down	5.84e-05	-1.12787	down	9.66e-10	-1.8251	down	Amino acid transport and metabolism	Molecular Function: nucleotide binding (GO:0000166);; Biological Process: cellular amino acid metabolic process (GO:0006520);; Molecular Function: oxidoreductase activity, acting on the CH-NH2 group of donors, NAD or NADP as acceptor (GO:0016639);;	K00261|1.2e-225|pxb:103956212|K00261 glutamate dehydrogenase (NAD(P)+) [EC:1.4.1.3] | (RefSeq) glutamate dehydrogenase 1	Amino acid transport and metabolism	Glutamate/Leucine/Phenylalanine/Valine dehydrogenase	Glutamate dehydrogenase B OS=Nicotiana plumbaginifolia OX=4092 GN=GDHB PE=2 SV=1	Amino acid transport and metabolism	Glutamate dehydrogenase [Actinidia chinensis var. chinensis]
VaccDscaff10-augustus-gene-12.37	0.650015	0.458709	0.555266	0.735165	0.775818	1.52103	1.20121	1.29676	1.24792	0.898533	1.44486	1.44862	0.304745	0.438965	0.781123	0.504734	0.227545	0.664265	--	--	--	0.00288459	1.22745	up	0.0100906	1.1594	normal	--	--	--	--	--	--	Posttranslational modification, protein turnover, chaperones	--	K13993|8.3e-15|cmax:111478336|K13993 HSP20 family protein | (RefSeq) 18.1 kDa class I heat shock protein-like	--	Hsp20/alpha crystallin family	21.7 kDa class VI heat shock protein OS=Arabidopsis thaliana OX=3702 GN=HSP21.7 PE=2 SV=1	Function unknown	hypothetical protein C3L33_11619, partial [Rhododendron williamsianum]
VaccDscaff10-augustus-gene-12.42	1.42386	1.28177	1.05021	1.37785	1.84175	2.08258	1.6401	1.50828	1.52391	0.896471	0.677993	0.886382	0.543332	0.637749	0.871125	0.359102	0.534884	0.577798	0.104698	0.54661	normal	0.102257	0.484812	normal	0.225459	-0.448757	normal	0.0836454	-0.667018	normal	0.00272528	-1.12308	down	Cell wall/membrane/envelope biogenesis	Molecular Function: protein kinase activity (GO:0004672);; Biological Process: protein phosphorylation (GO:0006468);;	K16224|3.9e-57|eus:EUTSA_v10023115mg|K16224 senescence-induced receptor-like serine/threonine-protein kinase | (RefSeq) hypothetical protein	Signal transduction mechanisms	Protein tyrosine and serine/threonine kinase	Calcium/calmodulin-regulated receptor-like kinase 1 OS=Arabidopsis thaliana OX=3702 GN=CRLK1 PE=1 SV=1	Signal transduction mechanisms	hypothetical protein C3L33_11623, partial [Rhododendron williamsianum]
VaccDscaff10-augustus-gene-120.30	0.559984	0.383339	0.784912	0.55342	0.378877	0.494159	1.13234	1.19797	1.1031	1.71691	1.72538	1.5533	2.01747	1.96105	2.0729	2.62731	2.02773	2.57115	0.842693	-0.125866	normal	0.000199371	1.11468	up	7.24e-09	1.58336	up	8.14e-13	1.89885	up	3.49e-16	2.14619	up	Translation, ribosomal structure and biogenesis	Molecular Function: translation elongation factor activity (GO:0003746);; Molecular Function: GTPase activity (GO:0003924);; Molecular Function: GTP binding (GO:0005525);;	K03231|5.4e-92|jre:109018672|K03231 elongation factor 1-alpha | (RefSeq) elongation factor 1-alpha	Translation, ribosomal structure and biogenesis	Elongation factor Tu C-terminal domain	Elongation factor 1-alpha OS=Zea mays OX=4577 GN=EF1A PE=3 SV=1	Translation, ribosomal structure and biogenesis	elongation factor 1-alpha [Rhododendron molle]
VaccDscaff10-augustus-gene-121.22	5.6034	5.81098	6.04883	5.35785	4.37134	5.17516	2.70337	3.05659	3.31749	2.97897	2.5028	2.95505	2.67089	1.94968	2.83778	2.07628	2.93305	1.56048	0.717882	-0.0973812	normal	4.36e-06	-0.746498	normal	1.84e-08	-0.901341	normal	4.44e-08	-1.04775	down	2.4e-07	-1.22873	down	--	Molecular Function: GTPase activity (GO:0003924);; Cellular Component: cellular_component (GO:0005575);; Cellular Component: intracellular (GO:0005622);; Cellular Component: cell (GO:0005623);; Cellular Component: cytoskeleton (GO:0005856);; Cellular Component: organelle (GO:0043226);; Cellular Component: non-membrane-bounded organelle (GO:0043228);; Cellular Component: intracellular organelle (G…	K07374|1.5e-253|aip:107632203|K07374 tubulin alpha | (RefSeq) tubulin alpha-3 chain	Cytoskeleton	Tubulin/FtsZ family, GTPase domain	Tubulin alpha-3 chain OS=Arabidopsis thaliana OX=3702 GN=TUBA3 PE=1 SV=2	Cytoskeleton	hypothetical protein C3L33_12117, partial [Rhododendron williamsianum]
VaccDscaff10-augustus-gene-126.32	103.096	114.032	118.085	84.0869	93.1246	81.3562	44.7739	54.4711	45.2664	66.5894	60.7637	62.0434	37.0979	42.9576	55.1498	47.2733	45.8261	38.9772	0.0186199	-0.247084	normal	3.66e-26	-1.02453	down	3.74e-18	-0.689424	normal	1.32e-18	-1.14471	down	8.47e-36	-1.18668	down	--	Biological Process: reproduction (GO:0000003);; Biological Process: defense response to nematode (GO:0002215);; Biological Process: developmental process involved in reproduction (GO:0003006);; Molecular Function: peroxidase activity (GO:0004601);; Cellular Component: cellular_component (GO:0005575);; Cellular Component: intracellular (GO:0005622);; Cellular Component: cell (GO:0005623);; Cellula…	K00430|8.2e-148|mesc:110620727|K00430 peroxidase [EC:1.11.1.7] | (RefSeq) peroxidase A2-like	--	Peroxidase	Peroxidase 15 OS=Ipomoea batatas OX=4120 GN=pod PE=1 SV=1	Secondary metabolites biosynthesis, transport and catabolism	hypothetical protein C3L33_22501, partial [Rhododendron williamsianum]
VaccDscaff10-augustus-gene-13.25	4.69369	3.3116	3.7742	4.81396	5.49278	5.30726	5.15317	6.48473	5.00999	7.04874	6.46096	7.93207	6.28151	5.50061	7.18897	10.8981	10.166	10.9009	0.164309	0.469776	normal	0.0308887	0.648179	normal	0.000365178	0.947669	normal	0.00476949	0.81332	normal	4.77e-12	1.55112	up	Translation, ribosomal structure and biogenesis	Molecular Function: nucleic acid binding (GO:0003676);;	K13195|3.3e-16|jcu:105639699|K13195 cold-inducible RNA-binding protein | (RefSeq) cold-inducible RNA-binding protein	General function prediction only	RNA recognition motif. (a.k.a. RRM, RBD, or RNP domain)	Organelle RRM domain-containing protein 2, mitochondrial OS=Arabidopsis thaliana OX=3702 GN=ORRM2 PE=1 SV=1	RNA processing and modification	hypothetical protein C3L33_11627, partial [Rhododendron williamsianum]
VaccDscaff10-augustus-gene-131.14	6.73256	6.30726	7.73384	4.97677	4.58596	5.46001	7.72967	7.9512	7.53665	13.9785	16.0411	14.6768	4.63064	4.19826	4.54299	2.58785	3.27562	3.2397	0.134259	-0.327519	normal	0.0420021	0.340873	normal	4.1e-17	1.22223	up	0.0141355	-0.467331	normal	1.95e-07	-1.01954	down	Lipid transport and metabolism	Molecular Function: molecular_function (GO:0003674);; Molecular Function: catalytic activity (GO:0003824);; Cellular Component: cellular_component (GO:0005575);; Cellular Component: intracellular (GO:0005622);; Cellular Component: cell (GO:0005623);; Cellular Component: cytoplasm (GO:0005737);; Cellular Component: endoplasmic reticulum (GO:0005783);; Cellular Component: endoplasmic reticulum memb…	K10256|2.2e-173|ini:109150720|K10256 omega-6 fatty acid desaturase / acyl-lipid omega-6 desaturase (Delta-12 desaturase) [EC:1.14.19.6 1.14.19.22] | (RefSeq) delta(12)-fatty-acid desaturase FAD2-like	--	Fatty acid desaturase	Delta(12)-fatty-acid desaturase FAD2 OS=Vernicia fordii OX=73154 GN=FAD2 PE=1 SV=1	Lipid transport and metabolism	hypothetical protein C3L33_12174, partial [Rhododendron williamsianum]
VaccDscaff10-augustus-gene-131.17	5.6724	6.35121	6.2009	4.36086	4.40146	5.1162	2.95929	4.09536	3.77773	2.48115	2.067	2.72366	1.966	1.68661	1.07108	1.52428	1.10267	1.45449	0.317697	-0.252185	normal	0.00998701	-0.553224	normal	1.38e-08	-1.16112	down	1.18e-10	-1.70566	down	4.47e-18	-1.94478	down	Lipid transport and metabolism	Molecular Function: molecular_function (GO:0003674);; Molecular Function: catalytic activity (GO:0003824);; Molecular Function: monooxygenase activity (GO:0004497);; Cellular Component: cellular_component (GO:0005575);; Cellular Component: intracellular (GO:0005622);; Cellular Component: cell (GO:0005623);; Cellular Component: cytoplasm (GO:0005737);; Cellular Component: endoplasmic reticulum (GO…	K10256|2.6e-169|qsu:112015494|K10256 omega-6 fatty acid desaturase / acyl-lipid omega-6 desaturase (Delta-12 desaturase) [EC:1.14.19.6 1.14.19.22] | (RefSeq) delta(12)-fatty-acid desaturase FAD2	--	Fatty acid desaturase	Delta(12)-fatty-acid desaturase FAD2 OS=Vernicia fordii OX=73154 GN=FAD2 PE=1 SV=1	Lipid transport and metabolism	hypothetical protein C3L33_12174, partial [Rhododendron williamsianum]
VaccDscaff10-augustus-gene-138.27	8.39474	8.90856	7.53712	3.58002	4.34285	3.82672	1.84686	1.6554	2.05962	3.16528	2.27969	2.88958	2.00067	2.16242	2.14518	3.16995	2.47958	2.47924	2.42e-15	-0.934385	normal	9.09e-57	-1.95421	down	7.58e-28	-1.42656	down	5.93e-51	-1.80117	down	4.6e-29	-1.44503	down	Signal transduction mechanisms	Molecular Function: protein kinase activity (GO:0004672);; Molecular Function: protein binding (GO:0005515);; Cellular Component: cellular_component (GO:0005575);; Cellular Component: cell (GO:0005623);; Cellular Component: plasma membrane (GO:0005886);; Biological Process: protein phosphorylation (GO:0006468);; Cellular Component: membrane (GO:0016020);; Cellular Component: cell part (GO:0044464…	K13415|1.4e-48|sind:105179029|K13415 protein brassinosteroid insensitive 1 [EC:2.7.10.1 2.7.11.1] | (RefSeq) systemin receptor SR160-like	--	Leucine rich repeat	Leucine-rich repeat receptor-like tyrosine-protein kinase PXC3 OS=Arabidopsis thaliana OX=3702 GN=PXC3 PE=2 SV=1	Signal transduction mechanisms	hypothetical protein C3L33_12132, partial [Rhododendron williamsianum]
VaccDscaff10-augustus-gene-139.26	0.322578	0.353105	0.216883	0.792778	0.71784	0.4588	2.57165	2.95729	3.05828	7.77341	6.2769	6.62117	4.44403	3.82674	3.76602	7.44003	6.85854	7.25247	0.00172867	1.05171	up	3.87e-62	3.34701	up	7.95e-159	4.55076	up	8.33e-83	3.82234	up	1.44e-187	4.66847	up	Coenzyme transport and metabolism	Biological Process: chlorophyll biosynthetic process (GO:0015995);; Molecular Function: magnesium chelatase activity (GO:0016851);;	K03403|0.0e+00|gra:105799490|K03403 magnesium chelatase subunit H [EC:6.6.1.1] | (RefSeq) magnesium-chelatase subunit ChlH, chloroplastic	--	CobN/Magnesium Chelatase	Magnesium-chelatase subunit ChlH, chloroplastic OS=Arabidopsis thaliana OX=3702 GN=CHLH PE=1 SV=1	Coenzyme transport and metabolism	Magnesium-chelatase subunit ChlH like [Actinidia chinensis var. chinensis]
VaccDscaff10-augustus-gene-14.14	1.9103	1.35885	1.72296	1.05739	1.59706	1.20645	0.887177	0.872865	1.2212	0.923134	0.977291	0.952343	0.703189	0.625021	0.436517	0.413958	0.59488	0.524998	0.654483	-0.215132	normal	0.118465	-0.533871	normal	0.050806	-0.630282	normal	0.000526069	-1.24311	down	1.69e-05	-1.46021	down	Signal transduction mechanisms	Molecular Function: protein serine/threonine kinase activity (GO:0004674);; Molecular Function: ATP binding (GO:0005524);; Cellular Component: integral component of membrane (GO:0016021);; Biological Process: recognition of pollen (GO:0048544);;	K24104|4.0e-73|thj:104799061|K24104 GPN-loop GTPase | (RefSeq) LOW QUALITY PROTEIN: uncharacterized protein LOC104799061	--	Protein tyrosine and serine/threonine kinase	G-type lectin S-receptor-like serine/threonine-protein kinase At4g03230 OS=Arabidopsis thaliana OX=3702 GN=At4g03230 PE=3 SV=3	Signal transduction mechanisms	Receptor-like serine/threonine-protein kinase [Actinidia chinensis var. chinensis]
VaccDscaff10-augustus-gene-14.16	23.4874	26.5022	19.8889	36.0289	37.2925	38.0175	12.5364	12.5487	13.265	9.79194	9.97636	10.2769	10.0615	8.39177	11.4758	10.0122	9.64066	9.36024	5.19e-16	0.787347	normal	5.23e-10	-0.673817	normal	2.28e-21	-1.0737	down	1.15e-14	-1.05316	down	7.83e-24	-1.10649	down	Lipid transport and metabolism;; Secondary metabolites biosynthesis, transport and catabolism	Biological Process: cell morphogenesis (GO:0000902);; Molecular Function: molecular_function (GO:0003674);; Molecular Function: catalytic activity (GO:0003824);; Cellular Component: cellular_component (GO:0005575);; Cellular Component: intracellular (GO:0005622);; Cellular Component: cell (GO:0005623);; Cellular Component: cytoplasm (GO:0005737);; Biological Process: cellular aromatic compound me…	K14487|9.8e-312|rcu:8287873|K14487 auxin responsive GH3 gene family | (RefSeq) indole-3-acetic acid-amido synthetase GH3.6	--	GH3 auxin-responsive promoter	Indole-3-acetic acid-amido synthetase GH3.6 OS=Arabidopsis thaliana OX=3702 GN=GH3.6 PE=1 SV=1	Function unknown	hypothetical protein C3L33_11632, partial [Rhododendron williamsianum]
VaccDscaff10-augustus-gene-140.33	2.25156	2.90962	1.98321	2.84805	2.5246	3.2846	4.67351	4.54573	4.3373	7.31476	5.95603	6.02283	6.27953	4.90983	6.03362	5.64503	4.38263	5.09153	0.408704	0.348037	normal	7.4e-05	1.06451	up	1.1e-09	1.50055	up	2.33e-07	1.38229	up	1.07e-05	1.1946	up	--	Molecular Function: UDP-glycosyltransferase activity (GO:0008194);;	K13495|1.1e-91|oeu:111375019|K13495 cis-zeatin O-glucosyltransferase [EC:2.4.1.215] | (RefSeq) zeatin O-xylosyltransferase-like	Carbohydrate transport and metabolism;; Energy production and conversion	UDP-glucoronosyl and UDP-glucosyl transferase	Zeatin O-xylosyltransferase OS=Phaseolus vulgaris OX=3885 GN=ZOX1 PE=2 SV=1	--	Zeatin O-glucosyltransferase [Actinidia chinensis var. chinensis]
VaccDscaff10-augustus-gene-143.25	1.81117	1.82299	0.956779	1.56749	1.70306	1.25158	1.9895	2.50664	2.52813	2.38038	2.344	2.19007	0.964838	0.624304	0.433813	0.743116	0.664934	0.512564	0.88009	0.09051	normal	0.0118866	0.761122	normal	0.0234832	0.688178	normal	0.032403	-0.919801	normal	0.00576337	-1.03533	down	--	--	--	--	Plant protein of unknown function	UPF0481 protein At3g47200 OS=Arabidopsis thaliana OX=3702 GN=At3g47200 PE=2 SV=1	Function unknown	hypothetical protein C3L33_20602, partial [Rhododendron williamsianum]
VaccDscaff10-augustus-gene-143.28	6.75612	9.00506	6.11919	7.30907	10.5884	12.121	12.8132	8.87862	7.9151	6.12443	5.03515	5.2112	4.55158	4.40864	4.69606	2.80417	2.7458	3.38661	0.0233984	0.545693	normal	0.00721203	0.609757	normal	0.197546	-0.277669	normal	0.0104522	-0.507793	normal	2.84e-08	-1.11275	down	--	Cellular Component: integral component of membrane (GO:0016021);;	K15285|5.8e-39|mus:103979129|K15285 solute carrier family 35, member E3 | (RefSeq) UDP-galactose transporter 1	Carbohydrate transport and metabolism;; Amino acid transport and metabolism	Triose-phosphate Transporter family	UDP-URONIC ACID TRANSPORTER 1 OS=Arabidopsis thaliana OX=3702 GN=UUAT1 PE=1 SV=1	--	UDP-URONIC ACID TRANSPORTER 1 [Camellia sinensis]
VaccDscaff10-augustus-gene-146.38	0.20356	0.093658	0.116619	0.067695	0.167685	0.094913	0.137969	0.256156	0.097819	0.410698	0.384352	0.321135	0.123265	0.050504	0.013487	0.197624	0.148355	0.157149	--	--	--	--	--	--	0.00816125	1.31326	up	--	--	--	--	--	--	--	--	--	--	--	--	--	hypothetical protein C3L33_05174, partial [Rhododendron williamsianum]
VaccDscaff10-augustus-gene-149.15	1.32179	1.32312	1.16165	0.821375	1.16989	0.976078	1.62947	2.35597	2.17079	2.05666	1.57333	1.83874	2.41197	1.76498	2.38614	2.73904	2.29416	2.50963	0.533706	-0.220446	normal	3.34e-05	0.85603	normal	0.00120893	0.638366	normal	4.58e-06	0.927527	normal	1.22e-11	1.12571	up	General function prediction only	Molecular Function: molecular_function (GO:0003674);; Molecular Function: catalytic activity (GO:0003824);; Molecular Function: triglyceride lipase activity (GO:0004806);; Cellular Component: cellular_component (GO:0005575);; Cellular Component: intracellular (GO:0005622);; Cellular Component: cell (GO:0005623);; Cellular Component: lipid droplet (GO:0005811);; Biological Process: lipid metabolic…	K14674|0.0e+00|vvi:100258980|K14674 TAG lipase / steryl ester hydrolase / phospholipase A2 / LPA acyltransferase [EC:3.1.1.3 3.1.1.13 3.1.1.4 2.3.1.51] | (RefSeq) triacylglycerol lipase SDP1	General function prediction only	Domain of unknown function (DUF3336)	Triacylglycerol lipase SDP1 OS=Arabidopsis thaliana OX=3702 GN=SDP1 PE=1 SV=1	Lipid transport and metabolism	hypothetical protein C3L33_12183, partial [Rhododendron williamsianum]
VaccDscaff10-augustus-gene-15.38	0.938564	1.40396	0.802908	0.98542	1.16824	1.25564	1.67229	1.95002	2.27495	0.990039	0.861603	0.953867	0.461056	0.493167	0.42828	0.241027	0.280715	0.096449	0.700521	0.206702	normal	0.000829296	1.03165	up	0.958429	-0.0286471	normal	0.0295912	-0.924576	normal	4.75e-05	-1.9552	down	--	Molecular Function: protein serine/threonine kinase activity (GO:0004674);; Molecular Function: ATP binding (GO:0005524);; Molecular Function: carbohydrate binding (GO:0030246);; Biological Process: recognition of pollen (GO:0048544);;	K24104|9.7e-27|thj:104799061|K24104 GPN-loop GTPase | (RefSeq) LOW QUALITY PROTEIN: uncharacterized protein LOC104799061	--	D-mannose binding lectin	G-type lectin S-receptor-like serine/threonine-protein kinase At4g27290 OS=Arabidopsis thaliana OX=3702 GN=At4g27290 PE=3 SV=4	Signal transduction mechanisms	G-type lectin S-receptor-like serine/threonine-protein kinase [Actinidia chinensis var. chinensis]
VaccDscaff10-augustus-gene-150.13	5.30282	5.07938	6.26886	6.53367	6.92492	9.03935	12.0213	15.7951	12.9698	11.0563	12.4899	12.2796	15.8841	14.1316	9.50276	12.6261	13.4238	13.6226	0.0277348	0.523388	normal	5.08e-17	1.44893	up	9.13e-13	1.21512	up	1.46e-09	1.37815	up	5.14e-19	1.39106	up	--	Biological Process: mitochondrial fission (GO:0000266);; Cellular Component: mitochondrial outer membrane (GO:0005741);; Cellular Component: integral component of membrane (GO:0016021);; Biological Process: peroxisome fission (GO:0016559);;	K17969|1.1e-73|tcc:18598795|K17969 mitochondrial fission 1 protein | (RefSeq) mitochondrial fission 1 protein A	Cell wall/membrane/envelope biogenesis	Fis1 C-terminal tetratricopeptide repeat	Mitochondrial fission 1 protein A OS=Arabidopsis thaliana OX=3702 GN=FIS1A PE=1 SV=1	Cell wall/membrane/envelope biogenesis	Mitochondrial fission 1 protein like [Actinidia chinensis var. chinensis]
VaccDscaff10-augustus-gene-151.18	0.557434	0.791001	0.526246	1.04749	0.902837	1.26569	2.38503	1.88552	2.20434	1.67701	1.02217	1.2395	0.786176	0.927062	0.524464	1.11221	1.103	0.779496	0.0710659	0.726149	normal	1.08e-09	1.85664	up	0.00418623	1.0963	up	0.461351	0.394093	normal	0.0688929	0.772105	normal	Signal transduction mechanisms	Molecular Function: phosphorelay response regulator activity (GO:0000156);; Biological Process: phosphorelay signal transduction system (GO:0000160);; Molecular Function: molecular_function (GO:0003674);; Cellular Component: cellular_component (GO:0005575);; Cellular Component: intracellular (GO:0005622);; Cellular Component: cell (GO:0005623);; Cellular Component: nucleus (GO:0005634);; Biologic…	K14492|7.6e-75|jre:109011597|K14492 two-component response regulator ARR-A family | (RefSeq) two-component response regulator ARR9	Transcription	Response regulator receiver domain	Two-component response regulator ARR9 OS=Arabidopsis thaliana OX=3702 GN=ARR9 PE=1 SV=1	Transcription	hypothetical protein C3L33_12206, partial [Rhododendron williamsianum]
VaccDscaff10-augustus-gene-152.11	2.24303	2.3943	2.33536	1.55279	2.3991	1.87599	2.18891	2.34585	2.04673	3.58138	2.94276	3.08571	3.50212	2.669	3.6934	4.6162	4.58318	3.98011	0.733588	-0.127664	normal	0.649641	0.0988893	normal	0.00023546	0.585183	normal	0.000397383	0.650863	normal	5.33e-14	1.06156	up	--	Cellular Component: nucleus (GO:0005634);;	K14788|4.4e-303|vvi:100257259|K14788 ribosome biogenesis protein ENP2 | (RefSeq) nucleolar protein 10	General function prediction only	NUC153 domain	--	Translation, ribosomal structure and biogenesis	hypothetical protein F0562_017490 [Nyssa sinensis]
VaccDscaff10-augustus-gene-156.25	16.5594	18.8167	18.9303	11.5468	7.41032	10.1169	6.09929	7.00648	4.34305	6.34584	6.41376	8.20869	1.01045	0.583941	0.186213	0.593825	0.88511	1.55124	9.01e-05	-0.733709	normal	2.32e-13	-1.42245	down	2.4e-13	-1.22182	down	1.54e-47	-4.46193	down	7.03e-49	-3.86419	down	--	Molecular Function: diacylglycerol O-acyltransferase activity (GO:0004144);; Biological Process: glycerolipid biosynthetic process (GO:0045017);;	K20098|2.6e-59|mtr:MTR_4g078460|K20098 DNA excision repair protein ERCC-6-like 2 [EC:3.6.4.-] | (RefSeq) DNA repair and recombination RAD26-like protein, putative	--	Wax ester synthase-like Acyl-CoA acyltransferase domain	--	Function unknown	hypothetical protein C3L33_22892, partial [Rhododendron williamsianum]
VaccDscaff10-augustus-gene-159.23	1.73429	1.80539	1.91786	1.60012	1.5725	1.55391	4.30104	4.09504	4.08507	9.12459	8.65557	8.38841	8.88565	8.26445	6.96791	15.6507	13.8171	14.3365	0.839864	-0.0752771	normal	3.57e-21	1.36139	up	1.56e-86	2.37168	up	1.61e-49	2.28189	up	1.68e-180	3.14193	up	--	Molecular Function: protein binding (GO:0005515);;	--	--	F-box domain	F-box protein At2g41170 OS=Arabidopsis thaliana OX=3702 GN=At2g41170 PE=2 SV=1	Function unknown	hypothetical protein C3L33_12212, partial [Rhododendron williamsianum]
VaccDscaff10-augustus-gene-160.17	9.5362	9.69085	9.27048	15.5487	14.7228	15.5977	21.1554	20.9859	21.7052	15.3256	14.6924	13.8598	15.2709	15.2097	16.1429	14.9955	15.3793	16.4132	3e-24	0.80337	normal	2.29e-78	1.344	up	2.17e-18	0.752083	normal	2.48e-24	0.867873	normal	2.81e-25	0.866758	normal	--	Cellular Component: nucleus (GO:0005634);;	--	--	TFIIS helical bundle-like domain	Probable mediator of RNA polymerase II transcription subunit 26b OS=Arabidopsis thaliana OX=3702 GN=MED26B PE=2 SV=1	Transcription	hypothetical protein C3L33_12219, partial [Rhododendron williamsianum]
VaccDscaff10-augustus-gene-161.18	2.77091	3.50831	2.78007	2.6626	2.45404	3.45313	1.88004	2.03931	1.5014	1.32769	1.22999	1.01263	0.738946	0.867908	0.751286	0.706685	1.58364	1.04046	0.916873	0.0467852	normal	0.0257595	-0.537184	normal	5.91e-07	-1.15779	down	5.15e-12	-1.71799	down	9.88e-05	-1.23138	down	--	Molecular Function: GTPase activity (GO:0003924);; Molecular Function: structural constituent of cytoskeleton (GO:0005200);; Molecular Function: GTP binding (GO:0005525);; Cellular Component: cytoplasm (GO:0005737);; Cellular Component: microtubule (GO:0005874);; Biological Process: microtubule-based process (GO:0007017);;	K07375|2.5e-259|sind:105159935|K07375 tubulin beta | (RefSeq) tubulin beta-5 chain	Cytoskeleton	Tubulin/FtsZ family, GTPase domain	Tubulin beta-1 chain OS=Oryza sativa subsp. japonica OX=39947 GN=TUBB1 PE=2 SV=2	Cytoskeleton	hypothetical protein F0562_015396 [Nyssa sinensis]
VaccDscaff10-augustus-gene-166.29	0.513464	0.75768	0.618277	0.685931	0.798198	0.258388	0.664785	0.580415	0.8302	1.32625	1.04523	0.998157	0.361255	0.879252	0.633577	1.26056	1.1876	1.35071	0.994495	0.00669088	normal	0.536071	0.295561	normal	0.0115443	0.905276	normal	0.82163	0.14069	normal	0.000885362	1.10526	up	--	Biological Process: reproduction (GO:0000003);; Cellular Component: nuclear chromosome (GO:0000228);; Biological Process: nuclear division (GO:0000280);; Molecular Function: magnesium ion binding (GO:0000287);; Biological Process: meiotic DNA double-strand break processing (GO:0000706);; Biological Process: DNA double-strand break processing (GO:0000729);; Biological Process: DNA catabolic proces…	K10878|8.1e-45|oeu:111403139|K10878 meiotic recombination protein SPO11 | (RefSeq) DNA topoisomerase 6 subunit A	--	Type IIB DNA topoisomerase	--	Replication, recombination and repair	DNA topoisomerase 6 subunit A [Olea europaea var. sylvestris]
VaccDscaff10-augustus-gene-17.19	9.55971	10.0113	8.25398	7.33245	6.60919	7.8199	4.64046	4.89721	4.86151	4.78626	3.82501	6.23503	2.81296	2.94985	3.94896	4.15039	3.93912	4.06761	0.128548	-0.223202	normal	5.09e-12	-0.759244	normal	1.51e-05	-0.761459	normal	4.28e-19	-1.34581	down	2.17e-20	-1.0338	down	Lipid transport and metabolism	Molecular Function: lanosterol synthase activity (GO:0000250);; Cellular Component: lipid droplet (GO:0005811);; Biological Process: triterpenoid biosynthetic process (GO:0016104);; Molecular Function: beta-amyrin synthase activity (GO:0042300);;	K01853|0.0e+00|vvi:100243389|K01853 cycloartenol synthase [EC:5.4.99.8] | (RefSeq) cycloartenol Synthase	Lipid transport and metabolism	Squalene-hopene cyclase C-terminal domain	Cycloartenol Synthase OS=Panax ginseng OX=4054 GN=OSCPNX1 PE=1 SV=1	Lipid transport and metabolism	Cycloartenol Synthase [Actinidia chinensis var. chinensis]
VaccDscaff10-augustus-gene-171.21	1.67273	1.80874	1.74702	1.2788	1.51869	1.49074	1.81338	1.8531	1.91901	2.61527	2.23264	4.03393	3.41225	2.22013	3.17097	3.41723	3.89043	3.05725	0.738094	-0.150698	normal	0.343611	0.26845	normal	0.00370318	0.847233	normal	0.000698349	0.882999	normal	2.55e-07	1.11205	up	--	Cellular Component: chloroplast (GO:0009507);; Biological Process: cytochrome b6f complex assembly (GO:0010190);;	--	--	Cofactor assembly of complex C subunit B, CCB2/CCB4	Protein COFACTOR ASSEMBLY OF COMPLEX C SUBUNIT B CCB2, chloroplastic OS=Arabidopsis thaliana OX=3702 GN=CCB2 PE=1 SV=1	Function unknown	Protein COFACTOR ASSEMBLY OF COMPLEX C SUBUNIT B like [Actinidia chinensis var. chinensis]
VaccDscaff10-augustus-gene-171.22	6.86308	5.96102	6.16571	5.01762	4.61052	4.99885	3.4728	4.12292	3.50373	4.18856	3.74655	4.36388	2.62408	2.35963	3.22636	3.41287	2.8183	3.24827	0.13329	-0.245674	normal	5.17e-05	-0.584881	normal	0.000490916	-0.490481	normal	1.17e-10	-1.03926	down	3.07e-09	-0.840578	normal	--	--	--	Posttranslational modification, protein turnover, chaperones	--	--	Posttranslational modification, protein turnover, chaperones	hypothetical protein C3L33_12240, partial [Rhododendron williamsianum]
VaccDscaff10-augustus-gene-175.17	0.736334	0.756321	0.870951	0.578659	0.435064	0.508436	0.579697	0.473705	0.722104	0.460725	0.417994	0.503802	0.355396	0.213885	0.409831	0.375535	0.174817	0.242708	0.242196	-0.438592	normal	0.570854	-0.218871	normal	0.0677634	-0.603	normal	0.00611628	-1.02406	down	0.000503408	-1.33376	down	--	Biological Process: cell fate specification (GO:0001708);; Biological Process: regionalization (GO:0003002);; Molecular Function: molecular_function (GO:0003674);; Molecular Function: nucleic acid binding (GO:0003676);; Molecular Function: DNA binding (GO:0003677);; Molecular Function: transcription factor activity, sequence-specific DNA binding (GO:0003700);; Molecular Function: binding (GO:0005…	K14494|6.3e-66|mesc:110605206|K14494 DELLA protein | (RefSeq) DELLA protein GAIP-B-like	--	GRAS domain family	Protein SCARECROW OS=Ipomoea nil OX=35883 GN=SCR PE=1 SV=1	Transcription	hypothetical protein C3L33_12248, partial [Rhododendron williamsianum]
VaccDscaff10-augustus-gene-177.19	3.01627	2.57139	3.42514	3.40017	2.31904	2.91109	3.62197	3.1626	2.06585	4.28442	4.26831	4.36389	5.7204	5.61376	4.13477	6.09283	8.08016	5.87686	0.906562	0.0584112	normal	0.680078	0.150383	normal	0.00316489	0.634723	normal	0.00010892	0.92082	normal	1.89e-09	1.28024	up	Posttranslational modification, protein turnover, chaperones	Molecular Function: ATP binding (GO:0005524);; Cellular Component: cytoplasm (GO:0005737);; Molecular Function: peptidase activity (GO:0008233);; Biological Process: protein catabolic process (GO:0030163);; Molecular Function: proteasome-activating ATPase activity (GO:0036402);;	K03063|2.7e-174|nnu:104593735|K03063 26S proteasome regulatory subunit T3 | (RefSeq) 26S protease regulatory subunit 6B homolog	Posttranslational modification, protein turnover, chaperones	ATPase family associated with various cellular activities (AAA)	26S proteasome regulatory subunit 6B homolog OS=Helianthus annuus OX=4232 PE=1 SV=1	Posttranslational modification, protein turnover, chaperones	26S protease regulatory subunit 6B [Actinidia chinensis var. chinensis]
VaccDscaff10-augustus-gene-187.38	0.73185	1.2387	0.911705	0.712072	0.244148	0.354705	0.268083	0.040165	0	0.17053	0.126307	0.160259	0.046001	0	0.110596	0.029662	0.058116	0.110637	0.138615	-0.717273	normal	0.00136543	-2.1005	down	3.32e-06	-2.09754	down	4.9e-08	-3.16462	down	1.43e-08	-3.01041	down	--	Cellular Component: cellular_component (GO:0005575);; Cellular Component: intracellular (GO:0005622);; Cellular Component: cell (GO:0005623);; Cellular Component: cytoplasm (GO:0005737);; Cellular Component: endosome (GO:0005768);; Cellular Component: Golgi apparatus (GO:0005794);; Cellular Component: trans-Golgi network (GO:0005802);; Cellular Component: plasma membrane (GO:0005886);; Cellular C…	K13420|9.7e-14|mesc:110601988|K13420 LRR receptor-like serine/threonine-protein kinase FLS2 [EC:2.7.11.1] | (RefSeq) LRR receptor-like serine/threonine-protein kinase FLS2	--	D-mannose binding lectin	G-type lectin S-receptor-like serine/threonine-protein kinase At5g35370 OS=Arabidopsis thaliana OX=3702 GN=At5g35370 PE=2 SV=2	Function unknown	hypothetical protein C3L33_22380, partial [Rhododendron williamsianum]
VaccDscaff10-augustus-gene-192.35	34.537	35.5965	30.2691	44.0833	45.1091	51.2799	85.5267	85.1567	90.8473	33.2359	30.788	28.2341	40.4207	36.6959	42.2297	20.7423	17.6024	20.0368	2.52e-11	0.602768	normal	8.63e-111	1.56171	up	0.940819	0.0112934	normal	9.93e-06	0.408991	normal	3.09e-11	-0.624334	normal	Secondary metabolites biosynthesis, transport and catabolism;; Defense mechanisms	Molecular Function: monooxygenase activity (GO:0004497);; Molecular Function: iron ion binding (GO:0005506);; Molecular Function: oxidoreductase activity, acting on paired donors, with incorporation or reduction of molecular oxygen (GO:0016705);; Molecular Function: heme binding (GO:0020037);;	K20667|1.5e-209|qsu:112003765|K20667 beta-amyrin 28-monooxygenase [EC:1.14.14.126] | (RefSeq) beta-amyrin 28-oxidase-like isoform X1	Secondary metabolites biosynthesis, transport and catabolism;; Lipid transport and metabolism	Cytochrome P450	Beta-amyrin 28-monooxygenase OS=Vitis vinifera OX=29760 GN=CYP716A17 PE=1 SV=2	Secondary metabolites biosynthesis, transport and catabolism	Beta-amyrin 28-oxidase [Actinidia chinensis var. chinensis]
VaccDscaff10-augustus-gene-194.38	4.28239	1.29381	5.27477	1.48175	4.15972	4.05608	4.37657	3.25285	3.89396	2.44275	2.4139	0.563943	0.87132	0.401696	0.803176	1.53737	1.47339	1.35484	0.980831	-0.0252991	normal	0.766308	0.2153	normal	0.431214	-0.612736	normal	4.02e-06	-2.03504	down	0.0108444	-1.08798	normal	Signal transduction mechanisms	Molecular Function: protein kinase activity (GO:0004672);; Molecular Function: protein binding (GO:0005515);; Molecular Function: ATP binding (GO:0005524);; Cellular Component: cellular_component (GO:0005575);; Cellular Component: cell wall (GO:0005618);; Cellular Component: cell (GO:0005623);; Cellular Component: plasma membrane (GO:0005886);; Cellular Component: cell-cell junction (GO:0005911);…	K20359|8.1e-140|eus:EUTSA_v10006389mg|K20359 PRA1 family protein 1 | (RefSeq) hypothetical protein	--	Protein kinase domain	Probable leucine-rich repeat receptor-like protein kinase IMK3 OS=Arabidopsis thaliana OX=3702 GN=IMK3 PE=1 SV=1	Signal transduction mechanisms	hypothetical protein C3L33_22570, partial [Rhododendron williamsianum]
VaccDscaff10-augustus-gene-195.15	0.8648	1.37701	1.02604	1.0557	0.520861	0.87138	0.461374	0.299026	0.390266	0.891439	0.453038	0.597919	0.604197	0.669184	0.891363	1.04096	0.859822	1.18453	0.672911	-0.233262	normal	0.00123667	-1.21424	down	0.173535	-0.568002	normal	0.312747	-0.410143	normal	0.865827	0.0738539	normal	--	Cellular Component: exocyst (GO:0000145);; Biological Process: exocytosis (GO:0006887);; Biological Process: protein transport (GO:0015031);;	K07195|1.6e-304|vvi:100258036|K07195 exocyst complex component 7 | (RefSeq) exocyst complex component EXO70A1	Intracellular trafficking, secretion, and vesicular transport	Exo70 exocyst complex subunit	Exocyst complex component EXO70A1 OS=Arabidopsis thaliana OX=3702 GN=EXO70A1 PE=1 SV=1	Intracellular trafficking, secretion, and vesicular transport	Exocyst complex component EXO70A1 like [Actinidia chinensis var. chinensis]
VaccDscaff10-augustus-gene-196.21	1.51826	1.19812	1.37655	0.988042	0.658684	0.885775	0.534786	0.537727	0.624827	0.943495	0.944189	1.18485	0.739534	0.667084	0.776336	1.33263	1.33779	1.08203	0.122024	-0.504735	normal	0.000170878	-1.04022	down	0.392725	-0.272822	normal	0.0122717	-0.717757	normal	0.94511	0.024862	normal	Mobilome: prophages, transposons	Molecular Function: kinase activity (GO:0016301);; Molecular Function: starch binding (GO:2001070);;	K15535|1.2e-08|jre:108987321|K15535 phosphoglucan, water dikinase [EC:2.7.9.5] | (RefSeq) phosphoglucan, water dikinase, chloroplastic	--	Starch binding domain	--	Function unknown	Phosphoglucan, water dikinase [Actinidia chinensis var. chinensis]
VaccDscaff10-augustus-gene-198.18	13.0287	13.5767	12.2818	6.94957	7.9128	6.52169	5.04615	5.92471	6.51906	31.4962	31.4571	18.7989	39.291	34.8397	34.4135	53.9138	52.822	48.3812	1.26e-07	-0.718731	normal	6.92e-12	-0.955962	normal	9.62e-11	1.18136	up	1.12e-55	1.63535	up	1.08e-147	2.1422	up	--	--	--	Amino acid transport and metabolism	Serine hydrolase (FSH1)	Rhodanese-like domain-containing protein 6 OS=Arabidopsis thaliana OX=3702 GN=STR6 PE=2 SV=1	Amino acid transport and metabolism	dihydrofolate reductase-like isoform X1 [Camellia sinensis]
VaccDscaff10-augustus-gene-2.35	3.95589	3.6555	2.69981	8.8352	7.80818	6.63203	6.65286	11.4127	6.72935	7.10427	3.78291	10.4878	3.4969	10.5025	10.3844	7.9234	5.25467	10.8395	2.92e-09	1.21064	up	6.19e-08	1.3939	up	0.000913731	1.10378	up	0.000250359	1.32005	up	1.79e-06	1.32966	up	--	--	K08503|8.3e-94|sind:105176653|K08503 syntaxin of plants SYP5 | (RefSeq) syntaxin-51	Intracellular trafficking, secretion, and vesicular transport	SNARE domain	Syntaxin-51 OS=Arabidopsis thaliana OX=3702 GN=SYP51 PE=1 SV=1	Intracellular trafficking, secretion, and vesicular transport	hypothetical protein C3L33_11553, partial [Rhododendron williamsianum]
VaccDscaff10-augustus-gene-2.36	4.17326	4.38372	3.51015	2.40702	2.89659	2.50212	1.39457	2.06575	2.29547	1.50947	2.21673	1.22863	1.42017	1.20143	1.59472	1.55479	1.1389	1.3863	0.0177486	-0.481782	normal	0.000163107	-0.860123	normal	1.42e-05	-1.10007	down	5.78e-11	-1.33205	down	5.54e-12	-1.38125	down	--	Biological Process: microtubule cytoskeleton organization (GO:0000226);; Molecular Function: microtubule binding (GO:0008017);;	K16732|3.6e-263|qsu:112012954|K16732 protein regulator of cytokinesis 1 | (RefSeq) 65-kDa microtubule-associated protein 1-like	Cell cycle control, cell division, chromosome partitioning;; Cytoskeleton	Microtubule associated protein (MAP65/ASE1 family)	65-kDa microtubule-associated protein 1 OS=Arabidopsis thaliana OX=3702 GN=MAP65-1 PE=1 SV=1	--	65-kDa microtubule-associated protein 1 isoform X1 [Camellia sinensis]
VaccDscaff10-augustus-gene-210.23	4.59145	3.70508	4.37213	3.539	2.91624	3.22299	3.49211	3.40839	1.89037	2.49509	2.44382	2.75255	1.65225	1.82396	1.81766	1.96606	2.08956	1.63734	0.403502	-0.245849	normal	0.30798	-0.329247	normal	0.0101623	-0.574205	normal	3.19e-06	-1.07381	down	1.79e-05	-0.979941	normal	--	Biological Process: reproduction (GO:0000003);; Biological Process: developmental process involved in reproduction (GO:0003006);; Cellular Component: cellular_component (GO:0005575);; Cellular Component: intracellular (GO:0005622);; Cellular Component: cell (GO:0005623);; Cellular Component: cytoplasm (GO:0005737);; Cellular Component: cytosol (GO:0005829);; Biological Process: multicellular orga…	--	--	Late embryogenesis abundant protein	Late embryogenesis abundant protein ECP63 OS=Arabidopsis thaliana OX=3702 GN=ECP63 PE=2 SV=1	Function unknown	Embryonic protein like [Actinidia chinensis var. chinensis]
VaccDscaff10-augustus-gene-216.28	2.55181	2.60168	1.99875	0.425964	0.536214	0.676765	0.551498	0.65998	0.461593	0.458881	0.426674	0.910608	0.229582	0.270359	0.095518	0.161861	0.179853	0.341449	6.9e-11	-1.7403	down	2.42e-11	-1.81403	down	1.61e-07	-1.7292	down	1.26e-18	-3.11799	down	8.08e-19	-3.02661	down	Carbohydrate transport and metabolism	--	K01728|1.2e-216|oeu:111372210|K01728 pectate lyase [EC:4.2.2.2] | (RefSeq) probable pectate lyase 12	--	Pectate lyase	Probable pectate lyase 12 OS=Arabidopsis thaliana OX=3702 GN=At3g53190 PE=2 SV=2	Carbohydrate transport and metabolism	hypothetical protein C3L33_12384, partial [Rhododendron williamsianum]
VaccDscaff10-augustus-gene-22.41	147.008	165.143	135.962	160.752	154.454	164.223	90.0368	81.6088	92.1156	68.6871	57.3316	60.3064	54.8538	49.0642	61.2571	40.661	37.7669	40.7652	0.00829078	0.221984	normal	6.58e-12	-0.575868	normal	4.17e-40	-1.12804	down	8.77e-40	-1.27342	down	5.79e-110	-1.7501	down	--	--	--	--	Root cap	--	Function unknown	Cobyrinate a,c-diamide synthase [Actinidia chinensis var. chinensis]
VaccDscaff10-augustus-gene-220.32	3.00391	2.70479	2.431	3.15366	2.53045	2.9678	1.49595	1.72483	1.89234	1.90333	1.54513	1.87703	1.0755	1.35008	1.29225	1.11101	1.16135	1.06599	0.444865	0.203996	normal	0.0245721	-0.475567	normal	0.0256501	-0.470359	normal	1.61e-05	-0.94668	normal	3.93e-08	-1.10895	down	--	Molecular Function: UDP-glycosyltransferase activity (GO:0008194);;	K00927|4.1e-164|ini:109182250|K00927 phosphoglycerate kinase [EC:2.7.2.3] | (RefSeq) uncharacterized LOC109182250	Carbohydrate transport and metabolism;; Energy production and conversion	UDP-glucoronosyl and UDP-glucosyl transferase	UDP-glycosyltransferase 86A1 OS=Arabidopsis thaliana OX=3702 GN=UGT86A1 PE=2 SV=1	--	hypothetical protein F0562_016496 [Nyssa sinensis]
VaccDscaff10-augustus-gene-222.29	21.4212	24.449	22.5162	14.1742	15.0594	15.136	21.4153	22.8866	21.5923	76.5766	68.6933	67.3732	70.0073	68.598	67.2216	73.6065	73.1864	70.0625	2.32e-08	-0.493148	normal	0.163439	0.131267	normal	7.77e-126	1.76259	up	3.42e-111	1.74711	up	9.97e-163	1.81545	up	Amino acid transport and metabolism	Biological Process: response to acid chemical (GO:0001101);; Molecular Function: molecular_function (GO:0003674);; Molecular Function: catalytic activity (GO:0003824);; Biological Process: cellular protein modification process (GO:0006464);; Biological Process: proteolysis (GO:0006508);; Biological Process: ubiquitin-dependent protein catabolic process (GO:0006511);; Biological Process: cellular …	K10775|0.0e+00|dcr:108217754|K10775 phenylalanine ammonia-lyase [EC:4.3.1.24] | (RefSeq) phenylalanine ammonia-lyase 3	Secondary metabolites biosynthesis, transport and catabolism	Aromatic amino acid lyase	Phenylalanine ammonia-lyase OS=Camellia sinensis OX=4442 GN=PAL PE=2 SV=1	Secondary metabolites biosynthesis, transport and catabolism	hypothetical protein C3L33_12401, partial [Rhododendron williamsianum]
VaccDscaff10-augustus-gene-222.30	1.81055	1.16854	1.9681	0.742962	0.987983	0.960597	1.23828	1.81331	1.34598	4.40991	5.64407	4.73242	6.64157	4.76696	6.27361	5.94623	4.31558	6.23318	0.0446104	-0.658118	normal	0.978354	0.0116796	normal	2.45e-13	1.65818	up	4.89e-18	1.94664	up	1.51e-15	1.84467	up	Amino acid transport and metabolism	Biological Process: response to acid chemical (GO:0001101);; Molecular Function: molecular_function (GO:0003674);; Molecular Function: catalytic activity (GO:0003824);; Cellular Component: cellular_component (GO:0005575);; Cellular Component: intracellular (GO:0005622);; Cellular Component: cell (GO:0005623);; Cellular Component: cytoplasm (GO:0005737);; Cellular Component: cytosol (GO:0005829);;…	K10775|0.0e+00|dcr:108217754|K10775 phenylalanine ammonia-lyase [EC:4.3.1.24] | (RefSeq) phenylalanine ammonia-lyase 3	Secondary metabolites biosynthesis, transport and catabolism	Aromatic amino acid lyase	Phenylalanine ammonia-lyase OS=Camellia sinensis OX=4442 GN=PAL PE=2 SV=1	Secondary metabolites biosynthesis, transport and catabolism	hypothetical protein C3L33_12401, partial [Rhododendron williamsianum]
VaccDscaff10-augustus-gene-224.19	2.86314	2.71624	2.56376	1.91484	1.76724	2.04567	1.11781	0.737478	1.07168	0.732126	1.25006	0.921111	0.992072	0.751065	1.17812	0.740031	1.12003	1.31439	0.0678441	-0.364649	normal	5.01e-09	-1.25311	down	9.49e-08	-1.29821	down	1.96e-09	-1.29238	down	1.41e-06	-1.17314	down	--	Molecular Function: DNA binding (GO:0003677);; Cellular Component: nucleus (GO:0005634);; Biological Process: regulation of transcription, DNA-templated (GO:0006355);; Biological Process: response to hormone (GO:0009725);;	K14486|4.6e-76|ccaj:109790712|K14486 auxin response factor | (RefSeq) auxin response factor 19-like	--	Auxin response factor	Auxin response factor 18 OS=Oryza sativa subsp. japonica OX=39947 GN=ARF18 PE=2 SV=1	Transcription	hypothetical protein C3L33_12406, partial [Rhododendron williamsianum]
VaccDscaff10-augustus-gene-224.21	16.66	18.7923	20.5468	15.3229	12.8527	15.1876	20.2003	24.1998	20.1136	26.4557	26.4875	29.3166	35.2308	33.8605	34.5193	34.0011	30.1612	34.2945	0.160662	-0.236889	normal	0.00450479	0.384873	normal	8.68e-09	0.681399	normal	4.42e-21	1.04353	up	3.22e-18	0.962721	normal	Translation, ribosomal structure and biogenesis	Biological Process: response to acid chemical (GO:0001101);; Biological Process: immune system process (GO:0002376);; Molecular Function: molecular_function (GO:0003674);; Molecular Function: nucleic acid binding (GO:0003676);; Molecular Function: RNA binding (GO:0003723);; Molecular Function: single-stranded RNA binding (GO:0003727);; Molecular Function: mRNA binding (GO:0003729);; Molecular Fun…	K11294|1.6e-92|cit:102621789|K11294 nucleolin | (RefSeq) RNA-binding protein CP29B, chloroplastic	General function prediction only	RNA recognition motif. (a.k.a. RRM, RBD, or RNP domain)	29 kDa ribonucleoprotein A, chloroplastic OS=Nicotiana sylvestris OX=4096 PE=2 SV=1	RNA processing and modification	hypothetical protein C3L33_12404, partial [Rhododendron williamsianum]
VaccDscaff10-augustus-gene-229.24	1.27345	1.70032	0.243115	1.50359	1.79026	1.97308	6.30462	5.85961	6.73637	2.75625	2.66024	2.86411	3.20697	4.11912	3.22219	2.09556	2.00167	1.74144	0.419828	0.495097	normal	3.02e-08	2.40671	up	0.0248728	1.22718	normal	0.00250181	1.61553	up	0.181902	0.858923	normal	--	Molecular Function: calmodulin binding (GO:0005516);; Biological Process: defense response (GO:0006952);; Biological Process: response to biotic stimulus (GO:0009607);; Cellular Component: integral component of membrane (GO:0016021);;	K08472|8.7e-40|tcc:18597924|K08472 mlo protein | (RefSeq) MLO-like protein 3	--	Mlo family	MLO protein homolog 1 OS=Oryza sativa subsp. japonica OX=39947 GN=MLO1 PE=3 SV=2	Carbohydrate transport and metabolism	MLO-like protein [Actinidia chinensis var. chinensis]
VaccDscaff10-augustus-gene-230.19	4.47684	3.62814	4.45211	3.44775	3.51266	3.33483	2.40198	2.46928	2.37899	2.02198	2.19804	1.78165	1.09691	0.812647	0.937725	1.13292	1.19082	1.44102	0.601849	-0.154713	normal	0.00269228	-0.59744	normal	1.81e-05	-0.905481	normal	5.12e-16	-1.9183	down	1.8e-12	-1.54536	down	--	Molecular Function: molecular_function (GO:0003674);; Molecular Function: binding (GO:0005488);; Molecular Function: protein binding (GO:0005515);; Cellular Component: cellular_component (GO:0005575);; Cellular Component: intracellular (GO:0005622);; Cellular Component: cell (GO:0005623);; Cellular Component: nucleus (GO:0005634);; Cellular Component: cytoskeleton (GO:0005856);; Cellular Componen…	--	--	Protein of unknown function (DUF4005)	Protein IQ-DOMAIN 1 OS=Arabidopsis thaliana OX=3702 GN=IQD1 PE=1 SV=1	Function unknown	hypothetical protein C3L33_12423, partial [Rhododendron williamsianum]
VaccDscaff10-augustus-gene-246.21	107.229	114.149	102.465	189.992	185.292	195.631	369.667	386.536	395.572	261.199	252.278	246.098	240.165	224.847	247.275	246.077	236.993	231.652	1.58e-75	0.939422	normal	0	2.01257	up	1.51e-134	1.36052	up	6.37e-98	1.29617	up	4.32e-142	1.29476	up	Posttranslational modification, protein turnover, chaperones	Molecular Function: ATP binding (GO:0005524);;	K03283|0.0e+00|pavi:110756627|K03283 heat shock 70kDa protein 1/2/6/8 | (RefSeq) heat shock cognate 70 kDa protein 2	Posttranslational modification, protein turnover, chaperones	Hsp70 protein	Heat shock 70 kDa protein 1 OS=Arabidopsis thaliana OX=3702 GN=HSP70-1 PE=1 SV=3	Posttranslational modification, protein turnover, chaperones	Heat shock protein 70 family [Corchorus capsularis]
VaccDscaff10-augustus-gene-247.17	15.4125	14.073	13.6939	72.4761	73.7974	77.041	35.548	36.8933	36.6082	17.5077	16.3018	16.3884	15.5861	14.2676	16.6252	7.42744	8.20395	7.20805	2.57e-276	2.47411	up	9.59e-95	1.51577	up	0.000170609	0.347609	normal	0.0152662	0.264869	normal	3.75e-13	-0.763127	normal	--	Molecular Function: catalytic activity (GO:0003824);; Cellular Component: cellular_component (GO:0005575);; Cellular Component: cell (GO:0005623);; Cellular Component: plasma membrane (GO:0005886);; Biological Process: multicellular organism development (GO:0007275);; Biological Process: biological_process (GO:0008150);; Cellular Component: membrane (GO:0016020);; Biological Process: multicellula…	K01102|6.0e-129|gmx:100794388|K01102 pyruvate dehydrogenase phosphatase [EC:3.1.3.43] | (RefSeq) probable protein phosphatase 2C 4	Signal transduction mechanisms	Protein phosphatase 2C	Probable protein phosphatase 2C 4 OS=Arabidopsis thaliana OX=3702 GN=PLL5 PE=2 SV=1	Signal transduction mechanisms	hypothetical protein C3L33_12487, partial [Rhododendron williamsianum]
VaccDscaff10-augustus-gene-250.13	9.91557	10.2298	8.75541	6.85265	7.64366	7.66846	7.32566	7.68577	8.84042	16.8	14.4474	14.6874	14.8962	14.2535	16.2676	19.2366	19.5325	18.4519	0.0544345	-0.253043	normal	0.531465	-0.0908421	normal	2.15e-17	0.796359	normal	5.24e-17	0.809034	normal	2.89e-43	1.13543	up	Posttranslational modification, protein turnover, chaperones	Molecular Function: metalloendopeptidase activity (GO:0004222);; Molecular Function: ATP binding (GO:0005524);; Biological Process: proteolysis (GO:0006508);; Molecular Function: zinc ion binding (GO:0008270);; Cellular Component: integral component of membrane (GO:0016021);;	K08956|0.0e+00|qsu:112025448|K08956 AFG3 family protein [EC:3.4.24.-] | (RefSeq) ATP-dependent zinc metalloprotease FTSH 10, mitochondrial-like isoform X1	Posttranslational modification, protein turnover, chaperones	Peptidase family M41	ATP-dependent zinc metalloprotease FTSH 8, mitochondrial OS=Oryza sativa subsp. japonica OX=39947 GN=FTSH8 PE=3 SV=1	Posttranslational modification, protein turnover, chaperones	hypothetical protein C3L33_12501, partial [Rhododendron williamsianum]
VaccDscaff10-augustus-gene-256.15	1.07521	0.416522	0.697294	1.04215	0.74416	0.593167	2.12355	2.14704	2.10977	2.07922	1.81182	1.70573	2.09664	2.19889	2.66364	1.96766	2.49738	2.18649	0.811796	0.174609	normal	1.91e-05	1.58371	up	0.000652185	1.33865	up	8.81e-06	1.6917	up	2.06e-05	1.63592	up	--	--	--	--	--	--	Function unknown	hypothetical protein HYC85_022087 [Camellia sinensis]
VaccDscaff10-augustus-gene-257.22	7.5153	8.53887	7.95524	3.22172	3.24841	3.04203	3.27364	3.25655	3.29331	5.91711	5.61207	5.74733	4.34859	4.58816	5.60037	7.61491	7.33071	7.92584	4.48e-26	-1.18583	down	1.35e-23	-1.0956	down	0.00237687	-0.339629	normal	3.41e-05	-0.560426	normal	0.505319	0.0843791	normal	--	--	--	--	Domain of unknown function (DUF3527)	--	Function unknown	hypothetical protein C3L33_12522, partial [Rhododendron williamsianum]
VaccDscaff10-augustus-gene-258.25	4.40771	3.80874	4.12521	3.47485	2.98353	4.79386	11.3454	10.1808	10.9181	8.89727	8.5223	8.31645	5.59793	7.24467	6.17134	6.32824	7.2442	7.76403	0.993288	-0.0045292	normal	5.93e-34	1.56416	up	2.08e-18	1.17918	up	1.59e-05	0.773806	normal	2.79e-09	0.934405	normal	Cell wall/membrane/envelope biogenesis	Molecular Function: protein kinase activity (GO:0004672);; Molecular Function: ATP binding (GO:0005524);;	K14500|3.5e-211|egu:105059035|K14500 BR-signaling kinase [EC:2.7.11.1] | (RefSeq) probable serine/threonine-protein kinase At5g41260 isoform X1	--	Protein tyrosine and serine/threonine kinase	Serine/threonine-protein kinase BSK5 OS=Arabidopsis thaliana OX=3702 GN=BSK5 PE=1 SV=1	Signal transduction mechanisms	Serine/threonine-protein kinase [Actinidia chinensis var. chinensis]
VaccDscaff10-augustus-gene-258.27	0.077753	0.423555	0.269242	0.491149	0.131594	0.315693	0.840164	1.05365	0.975522	0.190862	0.413727	0.968277	0.492007	0.213453	0	0.513404	0.502261	0.682682	--	--	--	0.000919934	1.74902	up	--	--	--	--	--	--	--	--	--	Cell wall/membrane/envelope biogenesis	Molecular Function: protein kinase activity (GO:0004672);; Molecular Function: ATP binding (GO:0005524);;	K14500|1.4e-201|egu:105059035|K14500 BR-signaling kinase [EC:2.7.11.1] | (RefSeq) probable serine/threonine-protein kinase At5g41260 isoform X1	--	Protein tyrosine and serine/threonine kinase	Serine/threonine-protein kinase BSK5 OS=Arabidopsis thaliana OX=3702 GN=BSK5 PE=1 SV=1	Signal transduction mechanisms	Serine/threonine-protein kinase [Actinidia chinensis var. chinensis]
VaccDscaff10-augustus-gene-258.30	1.85061	1.49079	1.17131	1.1309	0.793901	0.953383	1.07746	0.769501	0.849263	0.737162	0.453209	0.530363	0.614435	0.750798	0.202482	0.407134	0.61459	0.457675	0.415702	-0.410381	normal	0.270304	-0.501532	normal	0.0128489	-1.10357	normal	0.0313042	-1.15469	normal	0.00393535	-1.31321	down	--	Molecular Function: zinc ion binding (GO:0008270);;	--	RNA processing and modification	RING-variant domain	--	RNA processing and modification	hypothetical protein C3L33_12525, partial [Rhododendron williamsianum]
VaccDscaff10-augustus-gene-259.20	0.710561	0.539347	0.554451	1.6661	1.67023	1.34574	0.746624	1.09492	0.96447	0.510728	0.476657	0.397471	0.2359	0.372366	0.766902	0.616354	0.617893	0.478831	4.48e-07	1.32645	up	0.0237611	0.773122	normal	0.654333	-0.218167	normal	0.721751	-0.220279	normal	0.871678	0.0794633	normal	--	Biological Process: fucose metabolic process (GO:0006004);; Cellular Component: integral component of membrane (GO:0016021);; Molecular Function: transferase activity, transferring glycosyl groups (GO:0016757);;	K23280|1.5e-110|peq:110031710|K23280 rhamnogalacturonan I rhamnosyltransferase [EC:2.4.1.351] | (RefSeq) uncharacterized protein At1g04910-like	--	GDP-fucose protein O-fucosyltransferase	O-fucosyltransferase 19 OS=Arabidopsis thaliana OX=3702 GN=OFUT19 PE=2 SV=1	Carbohydrate transport and metabolism	hypothetical protein HYC85_022049 [Camellia sinensis]
VaccDscaff10-augustus-gene-259.21	4.95262	4.77856	3.82322	3.6364	3.31623	5.04199	5.47201	5.49801	5.95451	8.81267	7.98998	8.22249	10.7258	12.942	10.6139	17.2265	15.6873	17.6577	0.918962	-0.0473062	normal	0.00627024	0.495026	normal	1.21e-10	0.998738	normal	9.26e-19	1.48012	up	1.53e-54	2.03372	up	--	--	--	--	--	--	--	uncharacterized protein LOC114270909 [Camellia sinensis]
VaccDscaff10-augustus-gene-26.18	1.8096	1.76097	0.626495	2.12043	1.56141	1.08119	2.15403	1.57888	1.79985	5.42355	7.97521	7.41404	4.67928	5.39159	5.97829	10.8966	12.6022	11.9995	0.679886	0.246208	normal	0.187974	0.544226	normal	3.64e-14	2.29941	up	8.28e-11	1.99933	up	4.7e-13	2.99056	up	Amino acid transport and metabolism	Biological Process: cellular amino acid metabolic process (GO:0006520);; Molecular Function: transaminase activity (GO:0008483);; Biological Process: biosynthetic process (GO:0009058);; Molecular Function: pyridoxal phosphate binding (GO:0030170);;	K00815|3.4e-191|mesc:110611399|K00815 tyrosine aminotransferase [EC:2.6.1.5] | (RefSeq) probable aminotransferase TAT2	Amino acid transport and metabolism	Aminotransferase class I and II	Probable aminotransferase TAT2 OS=Arabidopsis thaliana OX=3702 GN=At5g53970 PE=2 SV=1	Amino acid transport and metabolism	aromatic amino acid aminotransferase 1 [Camellia sinensis]
VaccDscaff10-augustus-gene-260.15	9.91637	11.649	10.9258	9.21899	10.2293	9.16011	7.12039	7.47793	6.96656	36.0926	33.5306	34.4822	40.5237	40.7189	37	59.6485	60.7588	60.6164	0.795516	-0.0580928	normal	0.000689874	-0.402572	normal	1.96e-101	1.80423	up	5.22e-90	2.01721	up	1.34e-258	2.62567	up	Carbohydrate transport and metabolism	Cellular Component: integral component of membrane (GO:0016021);; Molecular Function: transmembrane transporter activity (GO:0022857);;	K08193|1.9e-178|nsy:104249188|K08193 MFS transporter, ACS family, solute carrier family 17 (sodium-dependent inorganic phosphate cotransporter), other | (RefSeq) probable anion transporter 3, chloroplastic	Carbohydrate transport and metabolism	Major Facilitator Superfamily	Probable anion transporter 3, chloroplastic OS=Arabidopsis thaliana OX=3702 GN=ANTR3 PE=2 SV=2	Carbohydrate transport and metabolism	probable anion transporter 3, chloroplastic [Camellia sinensis]
VaccDscaff10-augustus-gene-261.14	0.764276	0.823687	0.550979	0.851074	0.154768	0.570106	1.33368	1.50999	1.18488	1.34239	1.01948	1.13036	1.11407	1.1007	0.868447	1.05919	0.938768	0.730663	0.80078	-0.195877	normal	0.0070244	1.00254	up	0.0602717	0.759975	normal	0.155821	0.634222	normal	0.319516	0.469169	normal	--	--	K18667|1.5e-08|smo:SELMODRAFT_446354|K18667 activating signal cointegrator complex subunit 2 | (RefSeq) hypothetical protein	--	--	--	--	hypothetical protein C3L33_12543, partial [Rhododendron williamsianum]
VaccDscaff10-augustus-gene-261.15	0.958577	0.51945	1.04298	1.89541	1.92364	2.02816	1.95879	2.68321	2.25102	0.639601	0.690893	0.485958	0.6977	0.567417	0.756955	0.66345	0.47137	0.616605	0.000124384	1.15191	up	5.04e-07	1.54551	up	0.551699	-0.303847	normal	0.786606	-0.145697	normal	0.485854	-0.343494	normal	Amino acid transport and metabolism	Biological Process: oligopeptide transport (GO:0006857);; Cellular Component: integral component of membrane (GO:0016021);; Molecular Function: transmembrane transporter activity (GO:0022857);;	K14638|1.9e-277|zju:107430722|K14638 solute carrier family 15 (peptide/histidine transporter), member 3/4 | (RefSeq) protein NRT1/ PTR FAMILY 8.1-like	Amino acid transport and metabolism	POT family	Protein NRT1/ PTR FAMILY 8.1 OS=Arabidopsis thaliana OX=3702 GN=NPF8.1 PE=1 SV=1	Amino acid transport and metabolism	protein NRT1/ PTR FAMILY 8.1-like [Camellia sinensis]
VaccDscaff10-augustus-gene-262.17	1.02917	1.38497	0.815858	1.02076	0.567001	1.29802	1.439	1.55452	1.41609	3.06253	1.95669	2.71487	3.2824	3.08922	2.14572	4.46551	3.69704	4.91251	0.972076	-0.0283399	normal	0.0725102	0.597672	normal	8.26e-06	1.30525	up	8.02e-07	1.49272	up	4.84e-18	2.10346	up	General function prediction only	Cellular Component: cellular_component (GO:0005575);; Cellular Component: intracellular (GO:0005622);; Cellular Component: cell (GO:0005623);; Cellular Component: cytoplasm (GO:0005737);; Biological Process: organelle organization (GO:0006996);; Biological Process: biological_process (GO:0008150);; Cellular Component: chloroplast (GO:0009507);; Cellular Component: plastid envelope (GO:0009526);; …	--	General function prediction only	Photosynthesis system II assembly factor YCF48	Photosystem II stability/assembly factor HCF136, chloroplastic OS=Arabidopsis thaliana OX=3702 GN=HCF136 PE=1 SV=1	Intracellular trafficking, secretion, and vesicular transport	Photosystem II stability/assembly factor like [Actinidia chinensis var. chinensis]
VaccDscaff10-augustus-gene-262.20	1.82889	1.73478	1.79388	5.60474	6.79994	5.61922	5.5332	6.30642	6.00462	1.2287	1.01343	1.37978	0.832833	0.442946	0.966117	0.566914	0.406899	0.455473	1.38e-31	1.79825	up	3.57e-41	1.89647	up	0.108442	-0.417573	normal	0.000941825	-1.04831	down	1.61e-10	-1.68765	down	Function unknown	Molecular Function: 4-hydroxybenzoate decaprenyltransferase activity (GO:0002083);; Biological Process: ubiquinone biosynthetic process (GO:0006744);; Biological Process: isoprenoid biosynthetic process (GO:0008299);; Cellular Component: integral component of mitochondrial inner membrane (GO:0031305);; Molecular Function: 4-hydroxybenzoate nonaprenyltransferase activity (GO:0047293);; Biological …	K15363|3.4e-63|bna:111210893|K15363 fanconi-associated nuclease 1 [EC:3.1.21.- 3.1.4.1] | (RefSeq) fanconi-associated nuclease 1 homolog	--	OPT oligopeptide transporter protein	Probable metal-nicotianamine transporter YSL12 OS=Oryza sativa subsp. japonica OX=39947 GN=YSL12 PE=2 SV=2	Function unknown	probable metal-nicotianamine transporter YSL7 [Camellia sinensis]
VaccDscaff10-augustus-gene-266.24	3.67505	3.85381	3.14424	6.16515	4.6123	6.42275	6.04129	7.41269	6.75677	3.76144	3.85111	3.40725	3.78064	3.5779	3.09721	1.04183	1.91714	1.39595	0.000712181	0.758754	normal	9.85e-09	1.08122	up	0.54046	0.175065	normal	0.658305	0.136269	normal	0.000445088	-1.09456	down	--	Molecular Function: methyltransferase activity (GO:0008168);;	K22546|1.0e-63|ath:AT3G44860|K22546 juvenile hormone-III synthase [EC:2.1.1.325] | (RefSeq) FAMT; farnesoic acid carboxyl-O-methyltransferase	--	SAM dependent carboxyl methyltransferase	Loganic acid O-methyltransferase OS=Catharanthus roseus OX=4058 GN=LAMT PE=1 SV=1	Function unknown	hypothetical protein C3L33_22808, partial [Rhododendron williamsianum]
VaccDscaff10-augustus-gene-270.23	7.19993	9.33651	7.12424	4.24224	4.75909	4.98497	5.15147	4.87929	4.07419	5.72195	5.69033	5.42196	3.12375	3.34029	3.92293	3.58965	3.65408	4.03768	8.49e-05	-0.610132	normal	0.000714012	-0.55091	normal	0.0226859	-0.351811	normal	2.47e-10	-1.01537	down	1.32e-09	-0.902925	normal	--	Molecular Function: kinase activity (GO:0016301);;	--	--	Domain of unknown function (DUF3527)	--	Function unknown	Serine/threonine-protein kinase [Actinidia chinensis var. chinensis]
VaccDscaff10-augustus-gene-274.26	2.26104	2.72371	2.03776	1.51621	2.09609	1.56934	1.6618	2.22154	1.29355	0.935106	0.72481	1.09962	0.345993	0.123652	0.46595	0.369413	0.667425	0.985114	0.455604	-0.281013	normal	0.491218	-0.24137	normal	5.43e-05	-1.16062	down	1.28e-10	-2.52477	down	4.19e-05	-1.52451	down	--	--	--	--	--	--	--	hypothetical protein C3L33_12586, partial [Rhododendron williamsianum]
VaccDscaff10-augustus-gene-274.31	0	0.059871	0	0	0	0	0	0	0.012456	1.33639	1.59732	1.25015	2.68228	2.3697	2.86179	6.42784	6.98469	6.54756	--	--	--	--	--	--	0.0113662	1.76803	normal	0.00189325	2.47931	up	0.000517802	2.86431	up	General function prediction only	Molecular Function: methyltransferase activity (GO:0008168);; Molecular Function: oxidoreductase activity (GO:0016491);; Biological Process: methylation (GO:0032259);;	K00574|0.0e+00|vvi:100249441|K00574 cyclopropane-fatty-acyl-phospholipid synthase [EC:2.1.1.79] | (RefSeq) tuberculostearic acid methyltransferase UfaA1	--	Mycolic acid cyclopropane synthetase	--	Cell wall/membrane/envelope biogenesis	Tuberculostearic acid methyltransferase [Actinidia chinensis var. chinensis]
VaccDscaff10-augustus-gene-277.31	0.212534	0.265323	0.317864	0.364431	0.337501	0.222873	0.713828	0.502407	0.476199	0.342865	0.434692	0.294225	0.49567	0.431466	0.404215	0.484716	0.322743	0.548878	0.677234	0.262783	normal	0.0023713	1.17716	up	0.291775	0.513616	normal	0.0431927	0.856736	normal	0.0453772	0.869237	normal	Translation, ribosomal structure and biogenesis	Biological Process: spliceosomal complex disassembly (GO:0000390);; Molecular Function: RNA binding (GO:0003723);; Molecular Function: helicase activity (GO:0004386);; Molecular Function: ATP binding (GO:0005524);; Cellular Component: catalytic step 2 spliceosome (GO:0071013);;	K12818|0.0e+00|vvi:100241659|K12818 ATP-dependent RNA helicase DHX8/PRP22 [EC:3.6.4.13] | (RefSeq) probable pre-mRNA-splicing factor ATP-dependent RNA helicase DEAH5	RNA processing and modification	Helicase associated domain (HA2)	Probable pre-mRNA-splicing factor ATP-dependent RNA helicase DEAH5 OS=Arabidopsis thaliana OX=3702 GN=At3g26560 PE=1 SV=2	RNA processing and modification	probable pre-mRNA-splicing factor ATP-dependent RNA helicase DEAH5 [Camellia sinensis]
VaccDscaff10-augustus-gene-280.34	25.01	25.0188	22.8241	15.1088	14.3049	14.7171	8.93714	10.0749	9.83848	13.6524	13.0227	11.2998	11.7677	9.63634	12.4594	13.2944	12.896	12.4941	2.26e-15	-0.592246	normal	2.41e-43	-1.14616	down	4.45e-17	-0.801046	normal	2.91e-18	-0.939819	normal	8.32e-24	-0.7576	normal	Lipid transport and metabolism;; General function prediction only	Cellular Component: membrane (GO:0016020);; Molecular Function: long-chain-alcohol oxidase activity (GO:0046577);; Molecular Function: flavin adenine dinucleotide binding (GO:0050660);;	K17756|0.0e+00|oeu:111391635|K17756 long-chain-alcohol oxidase [EC:1.1.3.20] | (RefSeq) long-chain-alcohol oxidase FAO1-like	--	GMC oxidoreductase	Long-chain-alcohol oxidase FAO1 OS=Lotus japonicus OX=34305 GN=FAO1 PE=1 SV=1	Energy production and conversion	hypothetical protein HYC85_019540 [Camellia sinensis]
VaccDscaff10-augustus-gene-283.30	2.89891	2.66467	3.18771	3.62678	3.44311	2.92959	2.47953	2.90279	3.02022	1.68715	1.30707	1.32369	1.41456	1.37002	1.71582	1.10037	0.963386	0.995093	0.106763	0.305096	normal	0.520285	0.123425	normal	3.39e-07	-0.871625	normal	4.85e-06	-0.790098	normal	2.6e-16	-1.34291	down	General function prediction only	Molecular Function: ADP binding (GO:0043531);;	K15078|6.2e-128|tcc:18614561|K15078 structure-specific endonuclease subunit SLX1 [EC:3.6.1.-] | (RefSeq) putative disease resistance protein RGA3	Signal transduction mechanisms	NB-ARC domain	Putative disease resistance protein RGA1 OS=Solanum bulbocastanum OX=147425 GN=RGA1 PE=2 SV=2	Signal transduction mechanisms	hypothetical protein HYC85_019049 [Camellia sinensis]
VaccDscaff10-augustus-gene-285.26	0.54141	0.597629	0.54844	0.441231	0.21965	0.235839	0.380221	0.342151	0.276785	0.299194	0.342717	0.343603	0.261391	0.217595	0.30441	0.241861	0.167268	0.303699	0.092804	-0.650997	normal	0.0898607	-0.54273	normal	0.0499706	-0.613426	normal	0.00583499	-0.899245	normal	0.00275143	-1.02368	down	General function prediction only	Molecular Function: ADP binding (GO:0043531);;	K15078|1.2e-133|tcc:18614561|K15078 structure-specific endonuclease subunit SLX1 [EC:3.6.1.-] | (RefSeq) putative disease resistance protein RGA3	Signal transduction mechanisms	NB-ARC domain	Putative disease resistance protein RGA1 OS=Solanum bulbocastanum OX=147425 GN=RGA1 PE=2 SV=2	Signal transduction mechanisms	hypothetical protein HYC85_019049 [Camellia sinensis]
VaccDscaff10-augustus-gene-288.33	9.6232	10.2851	8.94662	8.28758	8.59308	8.80181	4.40116	4.88987	5.35499	5.03041	5.5784	5.47353	3.65944	3.98839	4.85619	4.65571	4.67897	3.90757	0.831843	-0.0426128	normal	2.42e-11	-0.787177	normal	3.28e-09	-0.70314	normal	1.96e-14	-1.03876	down	2.24e-15	-0.96441	normal	Cell wall/membrane/envelope biogenesis	Molecular Function: nucleotide binding (GO:0000166);; Molecular Function: molecular_function (GO:0003674);; Molecular Function: catalytic activity (GO:0003824);; Molecular Function: protein kinase activity (GO:0004672);; Molecular Function: protein serine/threonine kinase activity (GO:0004674);; Molecular Function: binding (GO:0005488);; Molecular Function: ATP binding (GO:0005524);; Cellular Com…	K08790|7.2e-277|vvi:100252887|K08790 serine/threonine kinase 38 [EC:2.7.11.1] | (RefSeq) serine/threonine-protein kinase tricorner	General function prediction only	Protein kinase domain	Probable serine/threonine protein kinase IRE OS=Arabidopsis thaliana OX=3702 GN=IRE PE=2 SV=1	Signal transduction mechanisms	serine/threonine-protein kinase tricorner-like [Camellia sinensis]
VaccDscaff10-augustus-gene-297.22	0.632135	0.441802	0.660192	0.406057	0.352688	0.448184	0.263946	0.215835	0.157943	0.06841	0.150243	0.115926	0.377827	0.169913	0.290963	0.161705	0.211558	0.179875	0.426166	-0.339111	normal	0.00148409	-1.16114	down	3.39e-07	-2.01117	down	0.0484173	-0.819331	normal	8.38e-05	-1.4009	down	Transcription;; Replication, recombination and repair	Molecular Function: nucleic acid binding (GO:0003676);; Molecular Function: ATP binding (GO:0005524);; Molecular Function: zinc ion binding (GO:0008270);; Molecular Function: hydrolase activity, acting on acid anhydrides, in phosphorus-containing anhydrides (GO:0016818);;	K15505|0.0e+00|vvi:100264745|K15505 DNA repair protein RAD5 [EC:3.6.4.-] | (RefSeq) putative SWI/SNF-related matrix-associated actin-dependent regulator of chromatin subfamily A member 3-like 3	Transcription;; Replication, recombination and repair	SNF2 family N-terminal domain	DNA repair protein RAD5B OS=Arabidopsis thaliana OX=3702 GN=RAD5B PE=3 SV=1	--	hypothetical protein C3L33_12667, partial [Rhododendron williamsianum]
VaccDscaff10-augustus-gene-30.26	5.45742	6.01042	5.12521	4.81652	5.27203	4.02031	2.9493	3.14063	2.74086	2.31919	1.60993	1.73672	1.46591	0.798815	1.43501	1.12658	1.87831	1.83707	0.680804	-0.105759	normal	1.12e-07	-0.717424	normal	2.34e-17	-1.38885	down	8.63e-20	-1.95693	down	1.27e-14	-1.59243	down	--	Biological Process: response to acid chemical (GO:0001101);; Molecular Function: protein binding (GO:0005515);; Biological Process: response to stress (GO:0006950);; Biological Process: response to osmotic stress (GO:0006970);; Biological Process: biological_process (GO:0008150);; Biological Process: response to abiotic stimulus (GO:0009628);; Biological Process: response to salt stress (GO:00096…	K09527|8.5e-112|pmum:103319855|K09527 DnaJ homolog subfamily C member 7 | (RefSeq) TPR repeat-containing thioredoxin TTL1	General function prediction only	Tetratricopeptide repeat	TPR repeat-containing thioredoxin TTL1 OS=Arabidopsis thaliana OX=3702 GN=TTL1 PE=1 SV=1	Posttranslational modification, protein turnover, chaperones	hypothetical protein C3L33_11723, partial [Rhododendron williamsianum]
VaccDscaff10-augustus-gene-316.29	4.47161	5.50575	4.63004	2.8476	3.2026	3.03174	2.09929	2.44088	2.23038	2.51045	2.26053	2.42521	1.96247	1.69273	2.30212	2.28904	2.11279	3.00587	0.00179883	-0.539506	normal	4.53e-08	-0.907599	normal	8.98e-08	-0.871839	normal	2.11e-09	-1.11527	down	3.78e-05	-0.807387	normal	Amino acid transport and metabolism	Biological Process: allantoin metabolic process (GO:0000255);; Biological Process: allantoin catabolic process (GO:0000256);; Molecular Function: molecular_function (GO:0003674);; Molecular Function: catalytic activity (GO:0003824);; Molecular Function: ureidoglycolate hydrolase activity (GO:0004848);; Molecular Function: binding (GO:0005488);; Molecular Function: protein binding (GO:0005515);; C…	K18151|4.5e-216|pper:18789197|K18151 ureidoglycolate amidohydrolase [EC:3.5.1.116] | (RefSeq) ureidoglycolate hydrolase	--	Peptidase family M20/M25/M40	Ureidoglycolate hydrolase OS=Arabidopsis thaliana OX=3702 GN=UAH PE=1 SV=1	Posttranslational modification, protein turnover, chaperones	hypothetical protein C3L33_12692, partial [Rhododendron williamsianum]
VaccDscaff10-augustus-gene-316.34	6.52773	6.28049	6.02582	4.38513	4.94705	4.2523	3.16435	2.88581	2.9155	3.41562	2.57369	3.15089	2.26585	1.93912	2.29416	2.21473	2.25202	2.66278	0.0562533	-0.336265	normal	3.73e-09	-0.874949	normal	2.73e-08	-0.895416	normal	4.76e-16	-1.34944	down	2.12e-14	-1.23002	down	--	Biological Process: microtubule cytoskeleton organization (GO:0000226);; Biological Process: cell morphogenesis (GO:0000902);; Biological Process: regulation of cell growth (GO:0001558);; Molecular Function: molecular_function (GO:0003674);; Molecular Function: binding (GO:0005488);; Molecular Function: protein binding (GO:0005515);; Cellular Component: cellular_component (GO:0005575);; Cellular …	K21596|1.8e-41|sind:105176456|K21596 calmodulin-binding transcription activator | (RefSeq) protein WVD2-like 2 isoform X1	--	Targeting protein for Xklp2 (TPX2) domain	Protein WVD2-like 3 OS=Arabidopsis thaliana OX=3702 GN=WDL3 PE=1 SV=1	Function unknown	protein WVD2-like 3 isoform X1 [Camellia sinensis]
VaccDscaff10-augustus-gene-32.22	24.1737	23.5824	22.9769	17.6282	17.3877	17.8021	12.2107	13.167	11.574	12.4444	11.0706	10.8374	9.43735	7.91041	10.5601	11.1434	11.1394	11.5171	1.7e-05	-0.294703	normal	3.59e-22	-0.749246	normal	3.7e-33	-0.905927	normal	2.51e-29	-1.17683	down	5.59e-43	-0.90975	normal	Energy production and conversion	Biological Process: tricarboxylic acid cycle (GO:0006099);; Molecular Function: phosphoenolpyruvate carboxylase activity (GO:0008964);; Biological Process: carbon fixation (GO:0015977);;	K01595|0.0e+00|oeu:111391584|K01595 phosphoenolpyruvate carboxylase [EC:4.1.1.31] | (RefSeq) phosphoenolpyruvate carboxylase isoform X1	--	Phosphoenolpyruvate carboxylase	Phosphoenolpyruvate carboxylase 2 OS=Flaveria trinervia OX=4227 GN=PPCC PE=1 SV=1	Energy production and conversion	phosphoenolpyruvate carboxylase [Vaccinium corymbosum]
VaccDscaff10-augustus-gene-324.26	3.36425	3.86268	3.91127	5.12081	3.91642	4.71389	13.2912	12.5159	12.8404	4.96968	1.45035	4.29089	4.6439	4.21544	4.70858	4.45394	4.32015	3.24266	0.0371017	0.413566	normal	4.27e-66	1.96624	up	0.908566	0.0599243	normal	0.00984425	0.442157	normal	0.233621	0.259124	normal	Inorganic ion transport and metabolism	Biological Process: sulfate assimilation (GO:0000103);; Molecular Function: adenylylsulfate kinase activity (GO:0004020);; Molecular Function: sulfate adenylyltransferase (ATP) activity (GO:0004781);;	K13811|2.4e-215|vvi:100259752|K13811 3'-phosphoadenosine 5'-phosphosulfate synthase [EC:2.7.7.4 2.7.1.25] | (RefSeq) ATP sulfurylase 1, chloroplastic-like	Inorganic ion transport and metabolism	ATP-sulfurylase	ATP sulfurylase 1, chloroplastic OS=Arabidopsis thaliana OX=3702 GN=APS1 PE=1 SV=1	Inorganic ion transport and metabolism	ATP sulfurylase 1, chloroplastic-like [Camellia sinensis]
VaccDscaff10-augustus-gene-330.30	0.554257	1.00961	0.482935	0.206275	1.18372	0.239765	1.40135	1.3727	1.28661	0.264702	0.275195	0.144933	0.231224	0.182668	0.143575	0.100567	0.134091	0.186169	0.897661	-0.113056	normal	0.00185639	1.09615	up	0.0146941	-1.21367	normal	0.00397809	-1.47956	down	0.000414741	-1.83341	down	--	Cellular Component: exocyst (GO:0000145);; Biological Process: exocytosis (GO:0006887);;	K07195|5.4e-174|nau:109211044|K07195 exocyst complex component 7 | (RefSeq) exocyst complex component EXO70A1-like	Intracellular trafficking, secretion, and vesicular transport	Exo70 exocyst complex subunit	Exocyst complex component EXO70A1 OS=Arabidopsis thaliana OX=3702 GN=EXO70A1 PE=1 SV=1	Intracellular trafficking, secretion, and vesicular transport	hypothetical protein C3L33_14738, partial [Rhododendron williamsianum]
VaccDscaff10-augustus-gene-334.26	1.18469	0.780644	0.537599	1.25814	0.944857	0.803003	0.897955	0.719511	0.934211	1.57363	0.987846	1.13649	1.46346	1.73581	1.22988	2.30269	2.63601	2.131	0.596561	0.303764	normal	0.727447	0.189533	normal	0.1667	0.619948	normal	0.0252901	0.919425	normal	3.06e-06	1.5644	up	Replication, recombination and repair	Molecular Function: nucleotidase activity (GO:0008252);;	K03787|1.6e-82|pmum:103324062|K03787 5'-nucleotidase [EC:3.1.3.5] | (RefSeq) 5'-nucleotidase SurE	--	Survival protein SurE	--	Function unknown	5'-nucleotidase [Actinidia chinensis var. chinensis]
VaccDscaff10-augustus-gene-34.29	1.00801	1.30194	0.98215	0.487178	0.529261	0.307032	0.464651	0.612514	0.624426	1.14751	1.52586	1.08459	1.1252	0.886456	1.27119	1.41369	1.30468	0.989344	0.000157334	-1.05489	down	0.00404309	-0.742794	normal	0.259069	0.319287	normal	0.610653	0.1531	normal	0.228982	0.317772	normal	Signal transduction mechanisms	Molecular Function: protein binding (GO:0005515);; Biological Process: regulation of transcription, DNA-templated (GO:0006355);; Biological Process: detection of visible light (GO:0009584);; Biological Process: protein-chromophore linkage (GO:0018298);;	K12121|0.0e+00|ppp:112293278|K12121 phytochrome B | (RefSeq) phytochrome 1-like isoform X1	--	Phytochrome region	Phytochrome C OS=Oryza sativa subsp. japonica OX=39947 GN=PHYC PE=2 SV=1	Signal transduction mechanisms	hypothetical protein C3L33_11745, partial [Rhododendron williamsianum]
VaccDscaff10-augustus-gene-342.29	0.391867	0.480476	0.419394	0.265649	0.357853	0.321889	0.176692	0.284045	0.343008	0.331542	0.133249	0.112047	0.125278	0.096867	0.102241	0.059065	0.105198	0.12186	0.625278	-0.272095	normal	0.358072	-0.446338	normal	0.0972156	-0.868641	normal	0.000736134	-1.58721	down	0.000243344	-1.78519	down	--	Molecular Function: molecular_function (GO:0003674);; Molecular Function: catalytic activity (GO:0003824);; Molecular Function: protein binding (GO:0005515);; Cellular Component: cellular_component (GO:0005575);; Cellular Component: intracellular (GO:0005622);; Cellular Component: cell (GO:0005623);; Cellular Component: cytoplasm (GO:0005737);; Biological Process: lipid metabolic process (GO:0006…	K15718|0.0e+00|nau:109217855|K15718 linoleate 9S-lipoxygenase [EC:1.13.11.58] | (RefSeq) probable linoleate 9S-lipoxygenase 5 isoform X1	--	Lipoxygenase	Probable linoleate 9S-lipoxygenase 5 OS=Solanum tuberosum OX=4113 GN=LOX1.5 PE=2 SV=1	Amino acid transport and metabolism	hypothetical protein C3L33_12310, partial [Rhododendron williamsianum]
VaccDscaff10-augustus-gene-342.30	2.1991	2.51114	2.38878	2.89335	2.52799	3.06103	13.8222	14.0783	14.819	7.39405	6.99171	6.2934	11.0814	10.5652	10.1564	7.19186	6.09934	6.8002	0.142022	0.364023	normal	1.67e-117	2.751	up	3.39e-27	1.65172	up	2.78e-60	2.30536	up	5.9e-27	1.6406	up	Carbohydrate transport and metabolism	Biological Process: response to acid chemical (GO:0001101);; Molecular Function: molecular_function (GO:0003674);; Molecular Function: transporter activity (GO:0005215);; Molecular Function: sugar:proton symporter activity (GO:0005351);; Molecular Function: glucose transmembrane transporter activity (GO:0005355);; Molecular Function: hydrogen:glucose symporter activity (GO:0005356);; Molecular Fu…	K24193|1.1e-255|sind:105171358|K24193 MFS transporter, SP family, sugar:H+ symporter | (RefSeq) sugar transport protein 13	General function prediction only	Sugar (and other) transporter	Sugar transport protein 13 OS=Arabidopsis thaliana OX=3702 GN=STP13 PE=1 SV=2	Intracellular trafficking, secretion, and vesicular transport	hypothetical protein C3L33_12306, partial [Rhododendron williamsianum]
VaccDscaff10-augustus-gene-344.17	12.8983	13.2621	11.9552	8.26978	7.49105	7.00117	4.07213	4.20685	4.00425	4.69938	4.56663	5.12939	4.19667	4.3748	3.73032	4.12265	4.2227	4.65955	2.45e-10	-0.609865	normal	1.34e-60	-1.44121	down	9.03e-41	-1.26548	down	5.77e-39	-1.45723	down	7.13e-49	-1.38958	down	--	Biological Process: metal ion transport (GO:0030001);; Molecular Function: metal ion binding (GO:0046872);;	--	Inorganic ion transport and metabolism	Heavy-metal-associated domain	Heavy metal-associated isoprenylated plant protein 32 OS=Arabidopsis thaliana OX=3702 GN=HIPP32 PE=2 SV=1	Inorganic ion transport and metabolism	Heavy metal-associated isoprenylated plant protein [Actinidia chinensis var. chinensis]
VaccDscaff10-augustus-gene-345.26	3.45288	3.9087	3.04612	2.79445	3.91096	3.32456	2.89113	2.39963	2.21841	1.9916	1.58263	1.7455	0.998232	0.718582	1.10872	0.878902	1.14991	1.14875	0.867144	0.0672015	normal	0.227052	-0.279727	normal	6.08e-05	-0.812143	normal	3.8e-12	-1.66804	down	8.18e-12	-1.52627	down	--	Molecular Function: GTPase activity (GO:0003924);; Molecular Function: structural constituent of cytoskeleton (GO:0005200);; Molecular Function: GTP binding (GO:0005525);; Cellular Component: cytoplasm (GO:0005737);; Cellular Component: microtubule (GO:0005874);; Biological Process: microtubule-based process (GO:0007017);;	K07374|2.2e-257|dzi:111281785|K07374 tubulin alpha | (RefSeq) tubulin alpha-2 chain	Cytoskeleton	Tubulin/FtsZ family, GTPase domain	Tubulin alpha chain OS=Prunus dulcis OX=3755 GN=TUBA PE=2 SV=1	Cytoskeleton	hypothetical protein CBR_g11996 [Chara braunii]
VaccDscaff10-augustus-gene-348.25	1.13495	1.1403	0.951715	1.27687	0.683819	1.18548	0.287985	0.382677	0.681629	2.39697	2.12166	2.15862	1.96841	1.13095	1.78638	7.04508	5.15607	7.10175	0.90867	0.0740401	normal	0.022688	-0.963336	normal	2.22e-06	1.1297	up	0.0298724	0.722224	normal	1.52e-40	2.67334	up	Secondary metabolites biosynthesis, transport and catabolism;; Defense mechanisms	Molecular Function: monooxygenase activity (GO:0004497);; Molecular Function: iron ion binding (GO:0005506);; Molecular Function: oxidoreductase activity, acting on paired donors, with incorporation or reduction of molecular oxygen (GO:0016705);; Molecular Function: heme binding (GO:0020037);;	K13083|2.8e-240|egr:104433887|K13083 flavonoid 3',5'-hydroxylase [EC:1.14.14.81] | (RefSeq) flavonoid 3',5'-hydroxylase 2	Secondary metabolites biosynthesis, transport and catabolism	Cytochrome P450	Flavonoid 3',5'-hydroxylase 1 OS=Petunia hybrida OX=4102 GN=CYP75A1 PE=1 SV=1	Secondary metabolites biosynthesis, transport and catabolism	flavonoid 3',5'-hydroxylase [Vaccinium corymbosum]
VaccDscaff10-augustus-gene-356.15	2.48494	2.79529	2.35434	2.21857	2.44205	1.82638	4.0748	4.34055	4.08955	3.94278	3.52874	4.51443	3.41989	3.31553	3.7053	4.89252	6.09991	5.62678	0.851775	-0.0946902	normal	4.07e-05	0.878124	normal	0.00132157	0.759774	normal	0.0158423	0.597248	normal	1.83e-09	1.25293	up	Posttranslational modification, protein turnover, chaperones	Molecular Function: peptide-methionine (R)-S-oxide reductase activity (GO:0033743);; Biological Process: oxidation-reduction process (GO:0055114);;	K07305|5.4e-69|egr:104425193|K07305 peptide-methionine (R)-S-oxide reductase [EC:1.8.4.12] | (RefSeq) peptide methionine sulfoxide reductase B5	Posttranslational modification, protein turnover, chaperones	SelR domain	Peptide methionine sulfoxide reductase B3, chloroplastic OS=Oryza sativa subsp. japonica OX=39947 GN=MSRB3 PE=2 SV=1	Posttranslational modification, protein turnover, chaperones	hypothetical protein C3L33_12797, partial [Rhododendron williamsianum]
VaccDscaff10-augustus-gene-356.19	0.52859	0.41671	0.442365	0.56433	0.51944	0.544531	1.07298	0.879927	1.28338	0.8787	1.03053	0.482004	0.493132	0.467611	0.5606	0.551901	0.367224	0.328203	0.502867	0.304522	normal	2.86e-06	1.33998	up	0.0272839	0.850696	normal	0.50054	0.28026	normal	0.999206	-0.000485391	normal	Cell wall/membrane/envelope biogenesis	Molecular Function: protein kinase activity (GO:0004672);; Molecular Function: ATP binding (GO:0005524);; Cellular Component: integral component of membrane (GO:0016021);;	K13415|2.2e-119|han:110929858|K13415 protein brassinosteroid insensitive 1 [EC:2.7.10.1 2.7.11.1] | (RefSeq) systemin receptor SR160-like	--	Leucine rich repeat	MDIS1-interacting receptor like kinase 2 OS=Arabidopsis thaliana OX=3702 GN=MIK2 PE=1 SV=3	--	MDIS1-interacting receptor like kinase 2-like isoform X1 [Camellia sinensis]
VaccDscaff10-augustus-gene-360.26	1.92524	3.68141	2.52196	1.69265	1.67784	1.59354	1.4954	1.0309	0.9876	0.648603	0.852293	0.749288	0.782526	0.81751	0.896616	0.903679	0.635288	0.959464	0.0357096	-0.539152	normal	0.000209253	-0.981346	normal	4.52e-11	-1.64562	down	8.32e-10	-1.49636	down	9.07e-09	-1.49618	down	Signal transduction mechanisms	Molecular Function: protein kinase activity (GO:0004672);; Molecular Function: ATP binding (GO:0005524);;	K17545|0.0e+00|vvi:100259712|K17545 serine/threonine-protein kinase ULK4 [EC:2.7.11.1] | (RefSeq) serine/threonine-protein kinase RUNKEL	General function prediction only	Protein kinase domain	Serine/threonine-protein kinase RUNKEL OS=Arabidopsis thaliana OX=3702 GN=RUK PE=1 SV=1	Signal transduction mechanisms	Serine/threonine-protein kinase [Actinidia chinensis var. chinensis]
VaccDscaff10-augustus-gene-361.23	5.40371	5.59836	5.70845	3.77026	3.35152	2.72693	3.3495	3.01774	3.65112	4.1065	3.63573	2.90399	2.35962	2.19435	2.28377	3.10254	2.90187	2.91337	0.000365138	-0.613356	normal	0.000191437	-0.547706	normal	0.003246	-0.507127	normal	9.27e-14	-1.11153	down	3.51e-08	-0.745214	normal	--	Molecular Function: molecular_function (GO:0003674);; Molecular Function: transcription factor activity, sequence-specific DNA binding (GO:0003700);; Molecular Function: binding (GO:0005488);; Molecular Function: protein binding (GO:0005515);; Molecular Function: phospholipid binding (GO:0005543);; Biological Process: regulation of transcription, DNA-templated (GO:0006355);; Biological Process: b…	K19600|5.7e-47|mis:MICPUN_63330|K19600 tubby-related protein 1 | (RefSeq) tubby-like protein	General function prediction only	Tub family	Tubby-like F-box protein 3 OS=Arabidopsis thaliana OX=3702 GN=TULP3 PE=1 SV=1	Function unknown	Tubby-like F-box protein [Actinidia chinensis var. chinensis]
VaccDscaff10-augustus-gene-361.27	3.11115	3.57613	3.08621	2.57249	2.47387	1.22713	1.94521	2.05752	2.16309	2.12205	2.21584	1.2018	1.61419	1.33102	1.79406	1.02235	1.60922	1.44721	0.194587	-0.4536	normal	0.0172917	-0.469638	normal	0.0194667	-0.653523	normal	7.04e-05	-0.863982	normal	7.19e-06	-1.07994	down	Signal transduction mechanisms	Molecular Function: molecular_function (GO:0003674);; Molecular Function: catalytic activity (GO:0003824);; Molecular Function: protein kinase activity (GO:0004672);; Molecular Function: protein serine/threonine kinase activity (GO:0004674);; Molecular Function: cyclin-dependent protein serine/threonine kinase activity (GO:0004693);; Molecular Function: ATP binding (GO:0005524);; Cellular Compone…	K08819|6.2e-276|ccav:112499618|K08819 cyclin-dependent kinase 12/13 [EC:2.7.11.22 2.7.11.23] | (RefSeq) probable serine/threonine-protein kinase At1g54610	Cell cycle control, cell division, chromosome partitioning	Protein kinase domain	Probable serine/threonine-protein kinase At1g54610 OS=Arabidopsis thaliana OX=3702 GN=At1g54610 PE=1 SV=1	Signal transduction mechanisms	hypothetical protein C3L33_12834, partial [Rhododendron williamsianum]
VaccDscaff10-augustus-gene-363.24	0.260742	0.309272	0.276426	0.2412	0.179812	0.240765	0.246348	0.259567	0.167649	0.544058	0.446353	0.40491	0.42698	0.339715	0.537639	0.602676	0.82894	0.80016	0.796712	-0.169433	normal	0.799932	-0.142506	normal	0.0355494	0.779069	normal	0.0731052	0.725523	normal	2.73e-06	1.47531	up	Signal transduction mechanisms	Molecular Function: protein serine/threonine kinase activity (GO:0004674);; Molecular Function: ATP binding (GO:0005524);; Cellular Component: integral component of membrane (GO:0016021);;	K20181|7.3e-99|mtr:MTR_5g026090|K20181 vacuolar protein sorting-associated protein 18 | (RefSeq) vacuolar sorting-associated-like protein	--	Protein kinase domain	Probable LRR receptor-like serine/threonine-protein kinase At3g47570 OS=Arabidopsis thaliana OX=3702 GN=At3g47570 PE=2 SV=1	Signal transduction mechanisms	probable LRR receptor-like serine/threonine-protein kinase At3g47570 [Camellia sinensis]
VaccDscaff10-augustus-gene-366.25	2.58956	2.09413	2.68446	2.0135	1.68131	1.48104	0.681371	0.969614	0.920731	1.3343	1.20066	0.929306	0.578493	0.760914	0.711839	0.967573	0.775062	0.93643	0.206919	-0.35662	normal	6.71e-08	-1.29085	down	0.000115289	-0.919867	normal	3.75e-11	-1.6376	down	2.96e-08	-1.26952	down	--	Molecular Function: protein binding (GO:0005515);;	K20285|1.0e-75|nta:107779821|K20285 Rab9 effector protein with kelch motifs | (RefSeq) acyl-CoA-binding domain-containing protein 4-like	General function prediction only	Kelch motif	--	Function unknown	acyl-CoA-binding domain-containing protein 4-like isoform X2 [Camellia sinensis]
VaccDscaff10-augustus-gene-37.38	0.40805	0.433918	0.387415	0.762468	0.352508	0.761665	1.43295	1.28874	1.43145	1.48051	2.06089	1.87494	1.89083	1.38746	1.06965	2.02056	1.67154	1.71063	--	--	--	1.48e-05	1.74294	up	1.6e-07	2.03336	up	6.4e-05	1.79652	up	2.79e-08	2.12427	up	--	Molecular Function: molecular_function (GO:0003674);; Molecular Function: transcription factor activity, sequence-specific DNA binding (GO:0003700);; Biological Process: regulation of transcription, DNA-templated (GO:0006355);; Biological Process: biological_process (GO:0008150);; Biological Process: regulation of biosynthetic process (GO:0009889);; Biological Process: regulation of gene expressi…	K08065|3.9e-57|mesc:110627444|K08065 nuclear transcription Y subunit beta | (RefSeq) nuclear transcription factor Y subunit B-3	Transcription	Histone-like transcription factor (CBF/NF-Y) and archaeal histone	Nuclear transcription factor Y subunit B-3 OS=Arabidopsis thaliana OX=3702 GN=NFYB3 PE=1 SV=1	Chromatin structure and dynamics	hypothetical protein C3L33_11751, partial [Rhododendron williamsianum]
VaccDscaff10-augustus-gene-370.31	2.35208	1.94864	1.23376	1.58173	1.91025	2.15208	2.49267	2.75216	3.30211	3.61568	3.63016	3.61369	4.59212	4.49745	4.74361	4.29278	5.37467	4.37791	0.833931	0.131873	normal	0.0280611	0.763047	normal	0.000776166	1.04105	up	1.04e-06	1.42306	up	1.23e-06	1.4389	up	--	Cellular Component: mitochondrion (GO:0005739);;	--	--	--	--	--	Integrator complex subunit like [Actinidia chinensis var. chinensis]
VaccDscaff10-augustus-gene-371.19	0.358497	0.491061	0.322582	0.369895	0.43163	0.261062	0.123644	0.193891	0.14276	0.17722	0.257759	0.215553	0.361446	0.211055	0.40893	0.253679	0.398841	0.319493	0.984759	-0.0151848	normal	0.00791409	-1.06224	down	0.115176	-0.646124	normal	0.87103	-0.0849644	normal	0.815747	-0.112064	normal	Defense mechanisms	Cellular Component: plant-type vacuole (GO:0000325);; Biological Process: response to acid chemical (GO:0001101);; Molecular Function: molecular_function (GO:0003674);; Molecular Function: catalytic activity (GO:0003824);; Molecular Function: transporter activity (GO:0005215);; Molecular Function: ATP binding (GO:0005524);; Cellular Component: cellular_component (GO:0005575);; Cellular Component:…	K05666|0.0e+00|hbr:110632940|K05666 ATP-binding cassette, subfamily C (CFTR/MRP), member 2 | (RefSeq) ABC transporter C family member 14-like	Secondary metabolites biosynthesis, transport and catabolism	ABC transporter	ABC transporter C family member 14 OS=Arabidopsis thaliana OX=3702 GN=ABCC14 PE=1 SV=1	Secondary metabolites biosynthesis, transport and catabolism	hypothetical protein C3L33_12891, partial [Rhododendron williamsianum]
VaccDscaff10-augustus-gene-373.30	20.5836	21.7434	22.3041	24.5174	21.7797	26.2563	32.2578	34.9672	29.9393	27.4777	32.872	33.544	37.3011	45.9538	33.4067	33.1634	30.9443	34.3658	0.0547342	0.286207	normal	1.07e-11	0.767415	normal	1.3e-06	0.665117	normal	3.99e-11	1.00624	up	5.7e-13	0.758244	normal	--	Biological Process: cytoplasmic translation (GO:0002181);; Molecular Function: molecular_function (GO:0003674);; Molecular Function: nucleic acid binding (GO:0003676);; Molecular Function: RNA binding (GO:0003723);; Molecular Function: mRNA binding (GO:0003729);; Molecular Function: structural constituent of ribosome (GO:0003735);; Molecular Function: structural molecule activity (GO:0005198);; M…	K02891|1.3e-53|rcu:8278743|K02891 large subunit ribosomal protein L22e | (RefSeq) 60S ribosomal protein L22-2	Translation, ribosomal structure and biogenesis	Ribosomal L22e protein family	60S ribosomal protein L22-2 OS=Arabidopsis thaliana OX=3702 GN=RPL22B PE=2 SV=1	Translation, ribosomal structure and biogenesis	hypothetical protein C3L33_12897, partial [Rhododendron williamsianum]
VaccDscaff10-augustus-gene-38.29	5.42089	7.12189	7.80961	3.93447	2.92288	14.5292	15.3287	12.0996	19.3682	10.8701	15.1939	14.9319	13.702	18.3974	9.7247	9.73362	6.31153	6.32613	0.910495	0.100634	normal	2.99e-12	1.35553	up	1.12e-08	1.11956	up	9.71e-07	1.17598	up	0.277367	0.282204	normal	Lipid transport and metabolism	Biological Process: reproduction (GO:0000003);; Biological Process: cell morphogenesis (GO:0000902);; Biological Process: cell morphogenesis involved in differentiation (GO:0000904);; Biological Process: developmental process involved in reproduction (GO:0003006);; Molecular Function: molecular_function (GO:0003674);; Molecular Function: catalytic activity (GO:0003824);; Molecular Function: acety…	K00626|4.3e-207|nnu:104594265|K00626 acetyl-CoA C-acetyltransferase [EC:2.3.1.9] | (RefSeq) acetyl-CoA acetyltransferase, cytosolic 1	Lipid transport and metabolism	Thiolase, N-terminal domain	Acetyl-CoA acetyltransferase, cytosolic 1 OS=Arabidopsis thaliana OX=3702 GN=AAT1 PE=1 SV=1	Lipid transport and metabolism	hypothetical protein C3L33_11753, partial [Rhododendron williamsianum]
VaccDscaff10-augustus-gene-380.40	216.342	210.805	217.388	233.438	242.06	243.108	406.986	413.731	389.652	217.604	229.562	205.496	240.335	246.494	207.639	126.222	121.621	117.015	2.35e-05	0.279557	normal	2.67e-77	1.09126	up	0.0985468	0.150859	normal	0.0115961	0.269707	normal	1.34e-26	-0.666868	normal	--	Molecular Function: protein phosphatase inhibitor activity (GO:0004864);; Biological Process: defense response (GO:0006952);; Biological Process: abscisic acid-activated signaling pathway (GO:0009738);; Molecular Function: abscisic acid binding (GO:0010427);; Molecular Function: signaling receptor activity (GO:0038023);;	--	--	Pathogenesis-related protein Bet v 1 family	Major allergen Pru ar 1 OS=Prunus armeniaca OX=36596 PE=1 SV=1	Function unknown	Major allergen Pru ar like [Actinidia chinensis var. chinensis]
VaccDscaff10-augustus-gene-380.41	73.3162	70.1392	79.4389	77.0168	66.5488	70.7493	202.712	175.26	175.324	75.6762	77.5645	75.6269	70.1239	69.0644	51.9688	17.7394	15.7006	19.3946	0.700322	0.066093	normal	9.42e-59	1.48837	up	0.113725	0.169715	normal	0.773651	-0.0567651	normal	1.68e-69	-1.9122	down	--	Molecular Function: protein phosphatase inhibitor activity (GO:0004864);; Biological Process: defense response (GO:0006952);; Biological Process: abscisic acid-activated signaling pathway (GO:0009738);; Molecular Function: abscisic acid binding (GO:0010427);; Molecular Function: signaling receptor activity (GO:0038023);;	--	--	Pathogenesis-related protein Bet v 1 family	Major allergen Pru ar 1 OS=Prunus armeniaca OX=36596 PE=1 SV=1	Function unknown	Major allergen Pru ar like [Actinidia chinensis var. chinensis]
VaccDscaff10-augustus-gene-381.28	31.7871	35.7275	33.5606	94.6393	102.867	112.051	312.363	289.798	281.493	44.4713	53.8575	41.3698	27.1985	28.7553	24.2372	8.82406	6.10113	5.38563	8.11e-64	1.71032	up	0	3.30075	up	7.51e-05	0.595881	normal	0.337401	-0.16681	normal	7.22e-28	-2.12131	down	--	Biological Process: defense response (GO:0006952);;	--	--	Pathogenesis-related protein Bet v 1 family	Major allergen Pru ar 1 OS=Prunus armeniaca OX=36596 PE=1 SV=1	Function unknown	hypothetical protein C3L33_12944, partial [Rhododendron williamsianum]
VaccDscaff10-augustus-gene-381.29	9.07875	10.4332	9.78348	20.2118	19.3058	23.8097	14.7444	13.7266	13.6804	13.3164	13.285	13.8084	9.05257	8.70359	9.44683	10.0608	8.44035	8.20432	1.55e-22	1.20813	up	7.19e-09	0.706095	normal	2.6e-06	0.593397	normal	0.77585	0.0548939	normal	0.919874	0.0214816	normal	--	--	K03676|2.9e-17|han:110906567|K03676 glutaredoxin 3 | (RefSeq) glutaredoxin-like	--	Protein of unknown function (DUF789)	--	Function unknown	core protein [Actinidia chinensis var. chinensis]
VaccDscaff10-augustus-gene-381.30	7.25337	7.80504	7.87976	25.4582	30.0796	30.5515	80.9879	79.2652	72.4665	9.77204	13.1109	10.2091	7.67879	9.9482	8.32145	1.20314	1.33334	1.57969	2.76e-49	1.97074	up	1.63e-258	3.50534	up	0.00159534	0.649321	normal	0.130678	0.334413	normal	3.05e-20	-2.2433	down	--	Biological Process: defense response (GO:0006952);;	--	--	Pathogenesis-related protein Bet v 1 family	Major allergen Pru ar 1 OS=Prunus armeniaca OX=36596 PE=1 SV=1	Function unknown	hypothetical protein C3L33_12944, partial [Rhododendron williamsianum]
VaccDscaff10-augustus-gene-381.37	90.4131	97.3359	95.6265	108.9	100.686	110.755	103.733	102.822	98.561	52.0677	50.6508	51.0448	56.2415	63.0708	56.58	22.9412	22.028	19.9516	0.0005328	0.299528	normal	0.0003279	0.290734	normal	7.87e-19	-0.745486	normal	5.42e-07	-0.522969	normal	1.36e-90	-1.96519	down	--	Biological Process: defense response (GO:0006952);;	--	--	Pathogenesis-related protein Bet v 1 family	Major allergen Pru ar 1 OS=Prunus armeniaca OX=36596 PE=1 SV=1	Function unknown	hypothetical protein C3L33_12944, partial [Rhododendron williamsianum]
VaccDscaff10-augustus-gene-381.38	20.4824	20.8022	24.0513	50.9168	52.9776	56.3892	63.6698	54.2283	53.6548	17.9563	27.1607	22.7017	10.9026	12.7078	9.17015	4.62728	4.0545	3.46509	2.02e-35	1.39018	up	2e-37	1.56371	up	0.445263	0.186339	normal	1.48e-05	-0.816027	normal	1.2e-35	-2.24145	down	--	Molecular Function: protein phosphatase inhibitor activity (GO:0004864);; Biological Process: defense response (GO:0006952);; Biological Process: response to biotic stimulus (GO:0009607);; Biological Process: abscisic acid-activated signaling pathway (GO:0009738);; Molecular Function: abscisic acid binding (GO:0010427);; Molecular Function: signaling receptor activity (GO:0038023);;	K05387|3.4e-11|peq:110030824|K05387 glutamate receptor, ionotropic, plant | (RefSeq) LOW QUALITY PROTEIN: glutamate receptor 2.3-like	--	Pathogenesis-related protein Bet v 1 family	Major allergen Pru ar 1 OS=Prunus armeniaca OX=36596 PE=1 SV=1	Function unknown	Major allergen Pru ar like [Actinidia chinensis var. chinensis]
VaccDscaff10-augustus-gene-382.17	0.360814	0.519422	0.448762	1.80234	2.41489	1.54139	4.92615	4.12888	4.71186	1.1246	1.10938	1.21761	0.883517	1.17048	1.09351	1.05129	0.529409	0.394333	--	--	--	1.16e-15	3.18667	up	--	--	--	--	--	--	--	--	--	--	Biological Process: defense response (GO:0006952);;	--	--	Pathogenesis-related protein Bet v 1 family	Major allergen Pru ar 1 OS=Prunus armeniaca OX=36596 PE=1 SV=1	Function unknown	hypothetical protein C3L33_12944, partial [Rhododendron williamsianum]
VaccDscaff10-augustus-gene-385.38	0.627001	0.658818	0.537558	0.565859	0.560991	0.374247	0.301917	0.319486	0.250645	1.21806	0.697078	0.973564	1.94558	2.32938	1.96255	1.87929	2.1739	2.232	--	--	--	--	--	--	0.117703	0.718382	normal	2.91e-08	1.83836	up	6.59e-09	1.85135	up	--	Biological Process: polysaccharide catabolic process (GO:0000272);; Molecular Function: pattern binding (GO:0001871);; Biological Process: defense response to nematode (GO:0002215);; Biological Process: immune system process (GO:0002376);; Molecular Function: molecular_function (GO:0003674);; Molecular Function: catalytic activity (GO:0003824);; Molecular Function: hydrolase activity, hydrolyzing…	K19891|7.1e-52|smo:SELMODRAFT_442025|K19891 glucan endo-1,3-beta-glucosidase 1/2/3 [EC:3.2.1.39] | (RefSeq) hypothetical protein	--	Glycosyl hydrolases family 17	Lichenase OS=Nicotiana plumbaginifolia OX=4092 GN=GN1 PE=2 SV=3	Carbohydrate transport and metabolism	hypothetical protein C3L33_12968, partial [Rhododendron williamsianum]
VaccDscaff10-augustus-gene-385.43	24.5262	20.9585	22.3207	21.5322	10.099	22.209	14.4541	16.0825	16.5446	11.6065	11.6118	12.1828	10.112	15.6228	8.1498	10.2831	7.00011	8.47814	0.626321	-0.191096	normal	0.0136755	-0.338286	normal	1.16e-09	-0.796724	normal	0.000690716	-0.812999	normal	7.01e-14	-1.22707	down	Signal transduction mechanisms	Molecular Function: nucleotide binding (GO:0000166);; Molecular Function: molecular_function (GO:0003674);; Molecular Function: binding (GO:0005488);; Cellular Component: cellular_component (GO:0005575);; Cellular Component: cell (GO:0005623);; Cellular Component: plasma membrane (GO:0005886);; Molecular Function: drug binding (GO:0008144);; Cellular Component: membrane (GO:0016020);; Molecular F…	K00847|1.1e-07|bna:106428977|K00847 fructokinase [EC:2.7.1.4] | (RefSeq) probable fructokinase-1 isoform X1	--	Universal stress protein family	--	Function unknown	hypothetical protein C3L33_12974, partial [Rhododendron williamsianum]
VaccDscaff10-augustus-gene-387.25	14.2538	18.1177	14.0311	27.9048	25.35	27.6843	49.9078	50.6741	52.0397	24.9909	23.4579	21.3379	25.0572	26.5027	30.3342	23.9995	23.5654	26.5629	2.99e-19	0.913999	normal	9.35e-94	1.89432	up	2.98e-10	0.717324	normal	6.39e-17	0.974644	normal	4.11e-14	0.827346	normal	Energy production and conversion	Molecular Function: ATP citrate synthase activity (GO:0003878);;	K01648|0.0e+00|rcu:8258819|K01648 ATP citrate (pro-S)-lyase [EC:2.3.3.8] | (RefSeq) ATP-citrate synthase beta chain protein 2	Energy production and conversion	Citrate synthase, C-terminal domain	ATP-citrate synthase beta chain protein 2 OS=Arabidopsis thaliana OX=3702 GN=ACLB-2 PE=1 SV=1	Energy production and conversion	ACL beta1 [Vaccinium corymbosum]
VaccDscaff10-augustus-gene-387.27	0.603576	0.617861	0.544699	0.459375	0.311062	0.472558	0.267101	0.601784	0.2456	0.223389	0.369887	0.362068	0.179709	0.223835	0.235585	0.323052	0.292827	0.299882	0.444865	-0.321608	normal	0.340566	-0.439405	normal	0.0574822	-0.698313	normal	0.00034033	-1.22436	down	0.0162046	-0.75355	normal		Molecular Function: MAP kinase kinase kinase activity (GO:0004709);; Molecular Function: ATP binding (GO:0005524);;	K04424|1.2e-99|sbi:8085533|K04424 sterile alpha motif and leucine zipper containing kinase AZK [EC:2.7.11.25] | (RefSeq) serine/threonine-protein kinase EDR1	Signal transduction mechanisms	Protein tyrosine and serine/threonine kinase	Probable serine/threonine-protein kinase SIS8 OS=Arabidopsis thaliana OX=3702 GN=SIS8 PE=1 SV=1	Signal transduction mechanisms	hypothetical protein F0562_005865 [Nyssa sinensis]
VaccDscaff10-augustus-gene-388.23	1.32545	0.991806	0.98326	1.38077	1.35157	1.26052	1.38158	1.50093	1.93749	2.35246	2.01115	1.98255	1.35809	1.65968	1.57448	1.38211	1.22181	1.15815	0.132271	0.375632	normal	0.00141196	0.711152	normal	9.78e-09	1.05265	up	0.00431962	0.624391	normal	0.146185	0.338294	normal	General function prediction only	Biological Process: defense response (GO:0006952);; Molecular Function: ADP binding (GO:0043531);;	K15078|1.2e-125|tcc:18614561|K15078 structure-specific endonuclease subunit SLX1 [EC:3.6.1.-] | (RefSeq) putative disease resistance protein RGA3	Signal transduction mechanisms	NB-ARC domain	Putative disease resistance protein RGA1 OS=Solanum bulbocastanum OX=147425 GN=RGA1 PE=2 SV=2	Signal transduction mechanisms	putative disease resistance protein RGA4 [Camellia sinensis]
VaccDscaff10-augustus-gene-39.35	4.1174	4.60915	3.87382	3.23101	3.17127	1.03016	2.44908	0	1.41982	2.90766	3.39371	2.66416	1.81085	2.0842	0.946789	0.152273	2.57024	2.88929	0.283798	-0.501919	normal	0.490935	-0.593722	normal	0.257625	-0.337976	normal	0.00137954	-1.13102	down	0.440212	-0.696583	normal	--	Biological Process: response to acid chemical (GO:0001101);; Molecular Function: molecular_function (GO:0003674);; Molecular Function: catalytic activity (GO:0003824);; Molecular Function: ubiquitin-protein transferase activity (GO:0004842);; Cellular Component: cellular_component (GO:0005575);; Cellular Component: intracellular (GO:0005622);; Cellular Component: cell (GO:0005623);; Cellular Comp…	K16285|2.2e-61|sly:101266432|K16285 RING/U-box domain-containing protein [EC:2.3.2.27] | (RefSeq) probable E3 ubiquitin-protein ligase XERICO isoform X1	Posttranslational modification, protein turnover, chaperones	Ring finger domain	Probable E3 ubiquitin-protein ligase XERICO OS=Arabidopsis thaliana OX=3702 GN=XERICO PE=1 SV=1	Posttranslational modification, protein turnover, chaperones	hypothetical protein C3L33_11767, partial [Rhododendron williamsianum]
VaccDscaff10-augustus-gene-390.33	22.7815	28.0539	25.7709	52.4314	48.0903	53.5932	30.1554	30.6698	35.3713	21.8466	18.8557	20.1782	15.3	16.5434	16.2495	13.7102	14.4054	14.8023	6.77e-34	1.11843	up	4.03e-06	0.510478	normal	0.117594	-0.197601	normal	2.15e-05	-0.506326	normal	1.1e-09	-0.677258	normal	--	Molecular Function: transcription factor activity, sequence-specific DNA binding (GO:0003700);; Cellular Component: nucleus (GO:0005634);; Molecular Function: sequence-specific DNA binding (GO:0043565);;	K12835|1.1e-33|cmax:111493042|K12835 ATP-dependent RNA helicase DDX42 [EC:3.6.4.13] | (RefSeq) DEAD-box ATP-dependent RNA helicase 24 isoform X1	--	WRKY DNA -binding domain	Probable WRKY transcription factor 48 OS=Arabidopsis thaliana OX=3702 GN=WRKY48 PE=2 SV=1	Transcription	probable WRKY transcription factor 48 [Camellia sinensis]
VaccDscaff10-augustus-gene-391.36	0.298119	0.256665	0.214391	0.583219	0.87172	0.380162	3.13471	2.89047	2.47818	0.385882	0.836519	0.160359	0.752584	1.46577	1.46163	0	0.19671	0.265811	--	--	--	2.29e-10	3.01227	up	--	--	--	--	--	--	--	--	--	--	Biological Process: defense response (GO:0006952);;	K05387|1.4e-12|peq:110030824|K05387 glutamate receptor, ionotropic, plant | (RefSeq) LOW QUALITY PROTEIN: glutamate receptor 2.3-like	--	Pathogenesis-related protein Bet v 1 family	Major allergen Pru ar 1 OS=Prunus armeniaca OX=36596 PE=1 SV=1	Function unknown	hypothetical protein C3L33_13018, partial [Rhododendron williamsianum]
VaccDscaff10-augustus-gene-392.27	1.65223	1.25111	1.5834	2.08096	0.93986	1.35645	1.12789	0.822187	1.46732	0.814768	0.80465	0.818198	0.931199	0.459901	0.5481	0.51865	0.468255	0.595553	0.898271	0.0791414	normal	0.60413	-0.198716	normal	0.013073	-0.709439	normal	0.00675769	-0.978624	normal	1.22e-05	-1.29874	down	--	Biological Process: polysaccharide biosynthetic process (GO:0000271);; Biological Process: response to acid chemical (GO:0001101);; Cellular Component: cellular_component (GO:0005575);; Cellular Component: intracellular (GO:0005622);; Cellular Component: cell (GO:0005623);; Cellular Component: cytoplasm (GO:0005737);; Cellular Component: endoplasmic reticulum (GO:0005783);; Cellular Component: Go…	K03377|1.1e-250|nnu:104607047|K03377 N-acetylneuraminate 9-O-acetyltransferase [EC:2.3.1.45] | (RefSeq) protein REDUCED WALL ACETYLATION 3	General function prediction only	10 TM Acyl Transferase domain found in Cas1p	Protein REDUCED WALL ACETYLATION 2 OS=Arabidopsis thaliana OX=3702 GN=RWA2 PE=1 SV=1	Posttranslational modification, protein turnover, chaperones	hypothetical protein C3L33_13019, partial [Rhododendron williamsianum]
VaccDscaff10-augustus-gene-393.24	1.2992	1.03638	0.996471	0.209407	0.617071	0.621591	0.421635	0.306134	0.453228	1.21248	1.32878	0.271154	0.691204	0.525461	0.845512	0.801026	0.815176	1.55573	0.101047	-0.76939	normal	0.00481295	-1.18234	down	0.907859	-0.0855948	normal	0.273594	-0.494507	normal	0.86619	0.0931457	normal	Translation, ribosomal structure and biogenesis	Molecular Function: structural constituent of ribosome (GO:0003735);; Cellular Component: ribosome (GO:0005840);; Biological Process: translation (GO:0006412);; Molecular Function: rRNA binding (GO:0019843);;	--	--	Ribosomal protein S6	--	Translation, ribosomal structure and biogenesis	hypothetical protein C3L33_13022, partial [Rhododendron williamsianum]
VaccDscaff10-augustus-gene-393.29	2.31545	2.41203	1.85804	5.94587	5.27638	6.08085	7.3329	7.69847	8.57264	3.76954	4.51157	3.87246	3.82243	4.33541	3.25181	2.53553	1.87592	2.9512	1.7e-15	1.4321	up	2.91e-32	1.98557	up	7.39e-06	0.984762	normal	0.00010627	0.930388	normal	0.324717	0.307861	normal	--	Molecular Function: DNA binding (GO:0003677);;	K09422|2.7e-108|pop:7468120|K09422 transcription factor MYB, plant | (RefSeq) transcription factor MYB108	Transcription	Myb-like DNA-binding domain	Transcription factor MYB108 OS=Arabidopsis thaliana OX=3702 GN=MYB108 PE=1 SV=1	--	transcription factor MYB108-like [Camellia sinensis]
VaccDscaff10-augustus-gene-395.21	0.739735	0.658942	0.404996	0.372204	0.255876	0.362229	0.197249	0.123708	0.290986	0.375402	0.248874	0.289704	0.165062	0.240492	0.423627	0.356868	0.183351	0.329001	0.194526	-0.578558	normal	0.00881553	-1.21175	down	0.0784344	-0.760197	normal	0.0756679	-0.882377	normal	0.075066	-0.81393	normal	--	Cellular Component: Golgi apparatus (GO:0005794);; Biological Process: protein glycosylation (GO:0006486);; Cellular Component: integral component of membrane (GO:0016021);; Molecular Function: transferase activity, transferring glycosyl groups (GO:0016757);; Molecular Function: carbohydrate binding (GO:0030246);;	K20843|8.4e-264|qsu:112022347|K20843 hydroxyproline O-galactosyltransferase 2/3/4/5/6 [EC:2.4.1.-] | (RefSeq) hydroxyproline O-galactosyltransferase GALT3	Carbohydrate transport and metabolism	Galactosyltransferase	Hydroxyproline O-galactosyltransferase GALT3 OS=Arabidopsis thaliana OX=3702 GN=GALT3 PE=2 SV=1	Carbohydrate transport and metabolism	Hydroxyproline O-galactosyltransferase [Actinidia chinensis var. chinensis]
VaccDscaff10-augustus-gene-396.27	2.94714	2.15039	1.86724	1.24274	1.3686	1.48703	0.684813	0.919211	0.86159	1.06731	1.16405	1.0608	1.22916	1.04695	1.09261	1.31787	1.25574	1.74696	0.000751799	-0.611058	normal	1.12e-12	-1.28912	down	8.48e-08	-0.928843	normal	1.23e-06	-0.871596	normal	0.00891775	-0.525145	normal	--	--	K19525|0.0e+00|vvi:100258011|K19525 vacuolar protein sorting-associated protein 13A/C | (RefSeq) uncharacterized LOC100258011	Intracellular trafficking, secretion, and vesicular transport	Vacuolar sorting-associated protein 13, N-terminal	--	Intracellular trafficking, secretion, and vesicular transport	Vacuolar protein sorting-associated protein like [Actinidia chinensis var. chinensis]
VaccDscaff10-augustus-gene-397.18	3.41112	2.73913	4.38886	2.43981	1.78878	1.90377	1.10799	1.71402	0.960627	0.602921	0.77704	0.565145	0.386135	0.50582	0.567857	0.608047	0.474213	0.633458	0.109276	-0.566398	normal	0.000663498	-1.20554	down	1.12e-09	-2.10692	down	2.3e-11	-2.49399	down	1.03e-10	-2.29777	down	--	Molecular Function: polysaccharide binding (GO:0030247);;	--	--	Wall-associated receptor kinase galacturonan-binding	--	Function unknown	hypothetical protein HYC85_019081 [Camellia sinensis]
VaccDscaff10-augustus-gene-397.24	1.013	1.68287	1.32124	1.45011	0.662494	0.966715	0.729708	0.575288	0.523198	0.524054	0.556491	0.586284	0.737606	0.416662	0.688902	0.879852	0.659869	0.834492	0.72565	-0.203487	normal	0.0154865	-0.87861	normal	0.00311027	-1.04383	down	0.024153	-0.894226	normal	0.117871	-0.576826	normal	--	Molecular Function: methyltransferase activity (GO:0008168);;	K22857|2.1e-41|hbr:110635276|K22857 EEF1A lysine methyltransferase 4 [EC:2.1.1.-] | (RefSeq) methyltransferase-like protein 13 isoform X1	Amino acid transport and metabolism	Thiopurine S-methyltransferase (TPMT)	--	Amino acid transport and metabolism	methyltransferase-like protein 13 isoform X1 [Hevea brasiliensis]
VaccDscaff10-augustus-gene-398.26	3.64494	2.20752	4.31859	2.1769	3.73809	5.72564	2.98402	3.19882	5.00827	5.98032	5.75096	6.33657	3.70393	5.9422	5.8228	7.21561	7.07635	9.82454	0.639482	0.257642	normal	0.44272	0.299459	normal	0.000715863	0.917902	normal	0.0263196	0.727684	normal	6.27e-07	1.35316	up	--	Biological Process: proteasome assembly (GO:0043248);;	K11878|1.8e-52|vvi:100244351|K11878 proteasome assembly chaperone 4 | (RefSeq) proteasome assembly chaperone 4	Nucleotide transport and metabolism	Proteasome assembly chaperone 4	--	Nucleotide transport and metabolism	hypothetical protein C3L33_23473, partial [Rhododendron williamsianum]
VaccDscaff10-augustus-gene-4.35	5.54741	5.93561	6.55037	5.49788	3.77538	5.00174	3.61406	2.74949	3.43822	3.04459	3.36112	3.703	2.75832	2.58572	3.07646	3.33393	1.75053	2.63764	0.497729	-0.197228	normal	0.00046088	-0.677859	normal	0.000259929	-0.688358	normal	7.13e-07	-0.921522	normal	2.4e-05	-1.03725	down	Transcription	Molecular Function: RNA binding (GO:0003723);; Molecular Function: ribonuclease III activity (GO:0004525);; Biological Process: RNA processing (GO:0006396);;	K11592|3.3e-54|bna:106375864|K11592 endoribonuclease Dicer [EC:3.1.26.-] | (RefSeq) endoribonuclease Dicer homolog 1	RNA processing and modification	Ribonuclease III domain	Ribonuclease 3-like protein 2 OS=Arabidopsis thaliana OX=3702 GN=RTL2 PE=1 SV=1	RNA processing and modification	Ribonuclease 3-like protein [Actinidia chinensis var. chinensis]
VaccDscaff10-augustus-gene-40.31	6.06211	6.07769	4.3755	4.22802	3.58698	4.64427	1.55557	2.73292	1.65492	4.44204	3.28832	3.38211	3.3801	3.74251	4.23476	2.13292	5.49882	4.64378	0.386592	-0.258799	normal	7.16e-06	-1.23228	down	0.0849183	-0.422267	normal	0.126449	-0.370263	normal	0.522131	-0.25967	normal	Translation, ribosomal structure and biogenesis	Molecular Function: molecular_function (GO:0003674);; Molecular Function: nucleic acid binding (GO:0003676);; Molecular Function: RNA binding (GO:0003723);; Molecular Function: translation elongation factor activity (GO:0003746);; Molecular Function: binding (GO:0005488);; Cellular Component: cellular_component (GO:0005575);; Cellular Component: intracellular (GO:0005622);; Cellular Component: ce…	K02357|3.7e-19|atr:18426703|K02357 elongation factor Ts | (RefSeq) uncharacterized protein LOC18426703	Translation, ribosomal structure and biogenesis	Elongation factor TS	Elongation factor Ts, mitochondrial OS=Arabidopsis thaliana OX=3702 GN=EFTS PE=1 SV=1	Translation, ribosomal structure and biogenesis	hypothetical protein C3L33_11777, partial [Rhododendron williamsianum]
VaccDscaff10-augustus-gene-400.43	1.59208	1.24594	0.930006	1.34916	0.863734	1.6837	3.86491	4.47227	2.88867	2.58054	2.80959	2.71523	4.74069	3.90695	3.37459	4.06335	4.40075	4.04498	0.786857	0.151548	normal	1.05e-11	1.69174	up	8.72e-07	1.1893	up	2.71e-13	1.78284	up	5.6e-18	1.84087	up	--	--	K22849|1.8e-59|vvi:100242564|K22849 diacylglycerol O-acyltransferase 3, plant [EC:2.3.1.20] | (RefSeq) uncharacterized LOC100242564	--	--	Diacylglycerol O-acyltransferase 3 OS=Arabidopsis thaliana OX=3702 GN=DGAT3 PE=1 SV=2	--	hypothetical protein C3L33_13072, partial [Rhododendron williamsianum]
VaccDscaff10-augustus-gene-44.25	7.3852	5.46591	6.33397	19.8189	19.0513	20.5531	34.158	31.0504	32.5973	21.8999	23.2173	22.8122	15.883	14.4433	14.5117	10.8177	10.9335	11.5172	9.01e-39	1.70365	up	1.79e-92	2.50993	up	5.89e-47	1.93271	up	1.15e-19	1.37073	up	7.07e-10	0.937798	normal	Secondary metabolites biosynthesis, transport and catabolism	Molecular Function: oxidoreductase activity (GO:0016491);; Molecular Function: metal ion binding (GO:0046872);;	K04125|6.7e-150|pop:7459116|K04125 gibberellin 2beta-dioxygenase [EC:1.14.11.13] | (RefSeq) gibberellin 2-beta-dioxygenase 1	Secondary metabolites biosynthesis, transport and catabolism;; General function prediction only	2OG-Fe(II) oxygenase superfamily	Gibberellin 2-beta-dioxygenase 1 OS=Pisum sativum OX=3888 GN=GA2OX1 PE=1 SV=1	Secondary metabolites biosynthesis, transport and catabolism	hypothetical protein F0562_008109 [Nyssa sinensis]
VaccDscaff10-augustus-gene-45.33	3.88863	3.42759	3.50121	3.34745	5.49031	4.02316	2.65863	3.31071	2.51806	1.9068	2.23548	1.87886	1.33495	0.761308	0.820384	1.85467	0	2.34619	0.474081	0.318792	normal	0.713317	-0.154421	normal	0.0744723	-0.658686	normal	0.000195813	-1.55904	down	0.522131	-0.644685	normal	--	--	K19891|1.4e-11|smo:SELMODRAFT_231287|K19891 glucan endo-1,3-beta-glucosidase 1/2/3 [EC:3.2.1.39] | (RefSeq) hypothetical protein	--	X8 domain	Glucan endo-1,3-beta-glucosidase OS=Triticum aestivum OX=4565 GN=GLC1 PE=2 SV=1	Function unknown	hypothetical protein TEA_016757 [Camellia sinensis var. sinensis]
VaccDscaff10-augustus-gene-5.28	4.02118	4.75773	4.2332	2.93484	3.0999	3.54025	2.04457	1.92875	1.80814	2.67477	1.86209	2.46826	1.80258	1.45498	1.97341	2.2485	1.79406	2.24194	0.0798013	-0.307078	normal	1.11e-11	-0.971462	normal	8.12e-06	-0.749016	normal	5.74e-12	-1.13991	down	9.11e-09	-0.884245	normal	--	Molecular Function: molecular_function (GO:0003674);; Molecular Function: binding (GO:0005488);; Molecular Function: protein binding (GO:0005515);; Molecular Function: histone binding (GO:0042393);; Molecular Function: lysine-acetylated histone binding (GO:0070577);; Molecular Function: modification-dependent protein binding (GO:0140030);; Molecular Function: acetylation-dependent protein binding…	K22184|2.5e-212|vvi:100267501|K22184 bromodomain-containing protein 9 | (RefSeq) uncharacterized LOC100267501	--	Bromodomain	Transcription factor GTE10 OS=Arabidopsis thaliana OX=3702 GN=GTE10 PE=1 SV=2	Function unknown	hypothetical protein C3L33_11572, partial [Rhododendron williamsianum]
VaccDscaff10-augustus-gene-51.30	8.02294	6.98978	7.14819	4.76084	4.19463	4.14997	3.38962	3.15326	3.26404	4.77416	3.93907	5.08746	2.336	2.95844	2.73296	3.53046	3.04694	3.44247	1.6e-08	-0.621803	normal	2.76e-21	-0.985394	normal	1.01e-05	-0.548395	normal	3.68e-23	-1.29392	down	7.9e-20	-0.985937	normal	Signal transduction mechanisms	Molecular Function: phosphorelay sensor kinase activity (GO:0000155);; Cellular Component: integral component of membrane (GO:0016021);;	K14489|0.0e+00|vvi:100263145|K14489 arabidopsis histidine kinase 2/3/4 (cytokinin receptor) [EC:2.7.13.3] | (RefSeq) CYT1; histidine kinase 2	Signal transduction mechanisms	CHASE domain	Histidine kinase 2 OS=Arabidopsis thaliana OX=3702 GN=AHK2 PE=1 SV=1	Signal transduction mechanisms	Histidine kinase [Actinidia chinensis var. chinensis]
VaccDscaff10-augustus-gene-52.41	0.062549	0.050176	0.194103	0.053953	0.306816	0.10149	0.393511	0.501068	0.432045	0.75485	0.963723	0.719596	0.220844	0.24842	0.209645	0.288138	0.353154	0.322149	--	--	--	--	--	--	1e-05	2.40831	up	--	--	--	--	--	--	--	Cellular Component: photosystem I (GO:0009522);; Cellular Component: photosystem II (GO:0009523);; Cellular Component: chloroplast thylakoid membrane (GO:0009535);; Biological Process: photosynthesis, light harvesting (GO:0009765);; Cellular Component: integral component of membrane (GO:0016021);; Molecular Function: chlorophyll binding (GO:0016168);; Biological Process: protein-chromophore linka…	K08913|2.2e-140|oeu:111412055|K08913 light-harvesting complex II chlorophyll a/b binding protein 2 | (RefSeq) chlorophyll a-b binding protein 37, chloroplastic	--	Chlorophyll A-B binding protein	Chlorophyll a-b binding protein 4, chloroplastic OS=Solanum lycopersicum OX=4081 GN=CAB4 PE=2 SV=1	Energy production and conversion	chlorophyll a-b binding protein 37, chloroplastic [Camellia sinensis]
VaccDscaff10-augustus-gene-53.34	0.828193	1.28579	0.770132	2.43412	1.64359	1.9358	2.69979	3.4248	3.48701	2.47283	1.98099	2.52666	2.94077	2.15545	2.82603	2.08227	2.42108	1.24816	0.00553504	0.980534	normal	2.22e-09	1.82294	up	0.000114596	1.30926	up	5.92e-06	1.5396	up	0.00932127	1.08065	up	Nucleotide transport and metabolism	Molecular Function: thymidine kinase activity (GO:0004797);; Molecular Function: ATP binding (GO:0005524);; Biological Process: DNA biosynthetic process (GO:0071897);;	K00857|9.6e-94|hbr:110649993|K00857 thymidine kinase [EC:2.7.1.21] | (RefSeq) thymidine kinase a	Nucleotide transport and metabolism	Thymidine kinase	Thymidine kinase OS=Oryza sativa subsp. japonica OX=39947 GN=TK PE=2 SV=2	Nucleotide transport and metabolism	Thymidine kinase [Actinidia chinensis var. chinensis]
VaccDscaff10-augustus-gene-65.35	2.50562	2.25503	2.77129	7.2326	7.29446	7.31556	4.33928	4.40657	3.88033	3.61504	2.59343	2.61694	2.13534	2.68921	1.08971	3.71171	4.32924	2.78629	1.17e-21	1.58354	up	9.89e-06	0.908442	normal	0.222659	0.348115	normal	0.720343	-0.166629	normal	0.0127564	0.656683	normal	--	Molecular Function: protein tyrosine phosphatase activity (GO:0004725);;	K18045|4.0e-83|hbr:110642548|K18045 tyrosine-protein phosphatase SIW14 [EC:3.1.3.48] | (RefSeq) probable tyrosine-protein phosphatase At1g05000	Defense mechanisms	Tyrosine phosphatase family	Tyrosine-protein phosphatase DSP1 OS=Arabidopsis thaliana OX=3702 GN=DSP1 PE=1 SV=1	Defense mechanisms	hypothetical protein HYC85_011947 [Camellia sinensis]
VaccDscaff10-augustus-gene-65.36	0.489654	1.09815	0.879446	0.741619	1.16873	0.740267	1.19632	1.78208	2.04352	1.59074	2.80392	1.90926	1.94491	2.02204	1.60725	1.85911	2.63148	2.71852	0.7536	0.189122	normal	0.00101527	1.13474	up	5.1e-05	1.38976	up	6.72e-05	1.28111	up	1.8e-07	1.63217	up	--	Biological Process: reproduction (GO:0000003);; Cellular Component: ubiquitin ligase complex (GO:0000151);; Cellular Component: nuclear ubiquitin ligase complex (GO:0000152);; Biological Process: developmental process involved in reproduction (GO:0003006);; Molecular Function: molecular_function (GO:0003674);; Molecular Function: catalytic activity (GO:0003824);; Molecular Function: ubiquitin-pro…	K10143|2.3e-309|zju:107417151|K10143 E3 ubiquitin-protein ligase RFWD2 [EC:2.3.2.27] | (RefSeq) E3 ubiquitin-protein ligase COP1 isoform X1	--	WD domain, G-beta repeat	E3 ubiquitin-protein ligase COP1 OS=Arabidopsis thaliana OX=3702 GN=COP1 PE=1 SV=2	Signal transduction mechanisms	hypothetical protein C3L33_11879, partial [Rhododendron williamsianum]
VaccDscaff10-augustus-gene-7.35	49.7137	59.9119	51.8684	48.5953	42.429	43.3776	25.0369	26.7223	25.6231	28.4513	25.9091	27.8826	23.7738	24.0313	28.0995	25.1202	24.222	22.7947	0.276447	-0.137376	normal	1.78e-25	-0.871941	normal	2.14e-22	-0.836646	normal	1.34e-20	-0.924343	normal	7.9e-31	-1.00485	down	Signal transduction mechanisms	Molecular Function: molecular_function (GO:0003674);; Molecular Function: catalytic activity (GO:0003824);; Molecular Function: acid phosphatase activity (GO:0003993);; Biological Process: phosphorus metabolic process (GO:0006793);; Biological Process: phosphate-containing compound metabolic process (GO:0006796);; Biological Process: biological_process (GO:0008150);; Biological Process: metabolic…	K22390|1.9e-216|tcc:18593556|K22390 acid phosphatase type 7 | (RefSeq) purple acid phosphatase 18	Carbohydrate transport and metabolism	Calcineurin-like phosphoesterase	Purple acid phosphatase 18 OS=Arabidopsis thaliana OX=3702 GN=PAP18 PE=2 SV=1	Carbohydrate transport and metabolism	hypothetical protein C3L33_11588, partial [Rhododendron williamsianum]
VaccDscaff10-augustus-gene-8.34	5.61981	5.471	4.88894	8.80155	9.22599	7.78278	18.1087	17.9279	18.2751	9.77292	11.1127	8.19527	9.95832	8.9332	9.13505	8.14762	6.80708	7.5654	1.93e-09	0.792041	normal	1.12e-92	1.93642	up	1.59e-10	0.983811	normal	5.57e-14	0.963754	normal	1.21e-06	0.643209	normal	Carbohydrate transport and metabolism	Cellular Component: integral component of membrane (GO:0016021);;	--	--	BT1 family	Probable folate-biopterin transporter 4 OS=Arabidopsis thaliana OX=3702 GN=At5g54860 PE=2 SV=1	Function unknown	Folate-biopterin transporter like [Actinidia chinensis var. chinensis]
VaccDscaff10-augustus-gene-85.28	2.40569	2.86842	3.3591	2.8652	1.06988	2.52135	2.51928	2.59795	2.25958	6.64188	5.15561	5.31272	4.72729	5.15597	5.0498	6.92057	6.85152	5.7453	0.667712	-0.237294	normal	0.914879	-0.0395879	normal	7.13e-07	1.08742	up	3.95e-05	0.932174	normal	4.01e-10	1.3066	up	--	--	--	--	Protein of unknown function (DUF1997)	--	Function unknown	hypothetical protein HYC85_027561 [Camellia sinensis]
VaccDscaff10-augustus-gene-85.32	1.23736	1.12176	1.51289	2.38505	2.18029	2.15462	0.909817	0.944301	1.27899	1.01666	0.761038	0.293198	0.596964	0.137634	0.213646	1.36669	1.19191	0.578642	1.93e-05	0.864807	normal	0.732609	-0.118142	normal	0.100589	-0.701042	normal	0.000215982	-1.66772	down	0.744848	-0.145263	normal	Inorganic ion transport and metabolism	Molecular Function: molecular_function (GO:0003674);; Molecular Function: catalytic activity (GO:0003824);; Molecular Function: transporter activity (GO:0005215);; Molecular Function: calcium-transporting ATPase activity (GO:0005388);; Cellular Component: cellular_component (GO:0005575);; Cellular Component: intracellular (GO:0005622);; Cellular Component: cell (GO:0005623);; Cellular Component: …	K01537|0.0e+00|vvi:100259585|K01537 P-type Ca2+ transporter type 2C [EC:7.2.2.10] | (RefSeq) putative calcium-transporting ATPase 13, plasma membrane-type	Inorganic ion transport and metabolism	Cation transporting ATPase, C-terminus	Putative calcium-transporting ATPase 13, plasma membrane-type OS=Arabidopsis thaliana OX=3702 GN=ACA13 PE=3 SV=1	Inorganic ion transport and metabolism	putative calcium-transporting ATPase 13, plasma membrane-type isoform X2 [Camellia sinensis]
VaccDscaff10-augustus-gene-87.24	1.71496	2.30378	1.87532	14.867	11.5743	15.7843	11.9847	9.28817	10.3687	3.04728	2.66237	3.21578	3.35563	3.6366	4.01922	1.2811	1.07952	1.64024	3.62e-54	2.78921	up	8.17e-40	2.5437	up	0.0125556	0.693908	normal	7.18e-05	1.02495	up	0.320165	-0.382682	normal	Coenzyme transport and metabolism	Molecular Function: alternative oxidase activity (GO:0009916);; Biological Process: oxidation-reduction process (GO:0055114);;	K17893|5.1e-109|cann:107853552|K17893 ubiquinol oxidase [EC:1.10.3.11] | (RefSeq) ubiquinol oxidase 2, mitochondrial-like	--	Alternative oxidase	Ubiquinol oxidase 1, mitochondrial OS=Nicotiana tabacum OX=4097 GN=AOX1 PE=1 SV=1	Energy production and conversion	hypothetical protein C3L33_08881, partial [Rhododendron williamsianum]
VaccDscaff10-augustus-gene-89.22	5.70038	4.40497	5.12084	4.77586	4.59714	4.19671	3.39046	2.31191	2.47299	2.66667	2.97959	3.14103	1.73597	2.04985	2.20069	2.06032	2.1264	1.65755	0.927472	-0.0399879	normal	0.00940589	-0.689162	normal	0.00803924	-0.643504	normal	4.65e-06	-1.15314	down	1.08e-06	-1.19918	down	--	Molecular Function: ADP binding (GO:0043531);;	K13459|2.6e-19|nnu:104592365|K13459 disease resistance protein RPS2 | (RefSeq) disease resistance protein At4g27190-like	Signal transduction mechanisms	NB-ARC domain	Probable disease resistance protein At4g27220 OS=Arabidopsis thaliana OX=3702 GN=At4g27220 PE=2 SV=1	Signal transduction mechanisms	Disease resistance protein [Actinidia chinensis var. chinensis]
VaccDscaff10-augustus-gene-90.16	3.83207	4.67384	4.78778	6.06619	4.50374	5.07814	2.54303	3.63278	3.04203	2.08969	1.19944	1.1929	0.734468	0.989488	1.31153	1.08217	0.993004	1.073	0.10279	0.346158	normal	0.122266	-0.335511	normal	1.09e-08	-1.38295	down	5.98e-16	-1.92697	down	1.23e-22	-1.88727	down	--	Molecular Function: protein serine/threonine phosphatase activity (GO:0004722);;	K17506|8.4e-21|mng:MNEG_3991|K17506 protein phosphatase 1L [EC:3.1.3.16] | (RefSeq) hypothetical protein	Signal transduction mechanisms	Protein phosphatase 2C	Probable protein phosphatase 2C 52 OS=Arabidopsis thaliana OX=3702 GN=At4g03415 PE=1 SV=1	Signal transduction mechanisms	Protein like [Actinidia chinensis var. chinensis]
VaccDscaff10-augustus-gene-92.19	0.762233	0.671418	1.09159	3.21156	2.12038	2.9244	4.10612	3.40209	3.91275	3.69486	3.65605	2.89619	5.24768	5.30447	4.59339	4.51615	3.71431	3.27803	0.000199685	1.39606	up	2.87e-09	2.18439	up	4.02e-07	1.95817	up	3.5e-13	2.58681	up	9.36e-09	2.20475	up	--	--	--	--	--	--	--	LIM and calponiny domains-containing protein [Actinidia chinensis var. chinensis]
VaccDscaff10-augustus-gene-93.19	22.6203	23.9069	20.9458	23.8348	20.9617	20.8424	8.15932	8.67062	8.41243	7.11734	6.15317	5.38652	7.12783	8.28811	7.99881	7.11536	7.69384	8.31959	0.565248	0.0849971	normal	2.68e-45	-1.22773	down	1.62e-51	-1.70494	down	1.48e-37	-1.35793	down	8.11e-44	-1.38366	down	Carbohydrate transport and metabolism	Molecular Function: hydrolase activity, hydrolyzing O-glycosyl compounds (GO:0004553);; Biological Process: carbohydrate metabolic process (GO:0005975);; Cellular Component: integral component of membrane (GO:0016021);;	K19355|3.0e-206|oeu:111389730|K19355 mannan endo-1,4-beta-mannosidase [EC:3.2.1.78] | (RefSeq) mannan endo-1,4-beta-mannosidase 2-like isoform X1	--	Cellulase (glycosyl hydrolase family 5)	Mannan endo-1,4-beta-mannosidase 2 OS=Arabidopsis thaliana OX=3702 GN=MAN2 PE=2 SV=1	Carbohydrate transport and metabolism	Mannan endo-1,4-beta-mannosidase [Actinidia chinensis var. chinensis]
VaccDscaff10-augustus-gene-93.20	0.751179	1.55788	1.48889	0.781839	0.512434	0.822315	0.589302	0.59881	0.64122	0.426017	0.527078	0.346779	0.343447	0.231006	0.195613	0.606549	0.496931	0.418833	0.182111	-0.574099	normal	0.035685	-0.812411	normal	0.00148889	-1.2678	down	8.09e-06	-1.91842	down	0.00706402	-1.08799	down	--	Cellular Component: spindle (GO:0005819);; Cellular Component: microtubule (GO:0005874);; Biological Process: activation of protein kinase activity (GO:0032147);; Biological Process: regulation of mitotic spindle organization (GO:0060236);;	K16812|2.7e-160|ini:109167648|K16812 targeting protein for Xklp2 | (RefSeq) protein TPX2	--	Cell cycle regulated microtubule associated protein	Protein TPX2 OS=Arabidopsis thaliana OX=3702 GN=TPX2 PE=1 SV=1	Function unknown	hypothetical protein CEY00_Acc18966 [Actinidia chinensis var. chinensis]
VaccDscaff10-augustus-gene-99.32	4.56379	5.83978	5.72858	5.40398	4.90399	5.29375	3.93621	3.93468	3.49679	2.47617	2.07627	1.32601	1.85315	1.95112	2.76259	2.06532	2.98089	1.85854	0.829201	0.0760129	normal	0.160299	-0.311403	normal	1.43e-06	-1.26268	down	4.43e-06	-1.11272	down	3.84e-05	-1.04661	down	General function prediction only	Molecular Function: GTPase activity (GO:0003924);; Molecular Function: GTP binding (GO:0005525);; Cellular Component: cellular_component (GO:0005575);; Cellular Component: intracellular (GO:0005622);; Cellular Component: cell (GO:0005623);; Cellular Component: cytoplasm (GO:0005737);; Cellular Component: endosome (GO:0005768);; Cellular Component: endomembrane system (GO:0012505);; Cellular Compo…	K07904|1.3e-114|crb:17876452|K07904 Ras-related protein Rab-11A | (RefSeq) ras-related protein RABA1f	Intracellular trafficking, secretion, and vesicular transport	Ras family	Ras-related protein RABA1f OS=Arabidopsis thaliana OX=3702 GN=RABA1F PE=2 SV=1	Intracellular trafficking, secretion, and vesicular transport	hypothetical protein C3L33_12025, partial [Rhododendron williamsianum]
VaccDscaff10-processed-gene-0.2	9.68899	11.3199	9.02396	21.2241	21.1189	23.1393	18.4322	18.9704	16.8125	6.9345	6.18324	7.35614	6.63106	6.2789	6.65186	5.71223	5.66801	6.50297	3.4e-30	1.22574	up	5.02e-19	1.02903	up	0.00641328	-0.415855	normal	0.0027238	-0.450176	normal	7.52e-05	-0.587022	normal	--	Molecular Function: molecular_function (GO:0003674);; Molecular Function: nucleic acid binding (GO:0003676);; Molecular Function: DNA binding (GO:0003677);; Molecular Function: transcription factor activity, sequence-specific DNA binding (GO:0003700);; Molecular Function: binding (GO:0005488);; Cellular Component: cellular_component (GO:0005575);; Cellular Component: intracellular (GO:0005622);; …	K14494|4.1e-61|pop:18099385|K14494 DELLA protein | (RefSeq) DELLA protein GAI	--	GRAS domain family	Scarecrow-like transcription factor PAT1 OS=Arabidopsis thaliana OX=3702 GN=PAT1 PE=1 SV=1	Transcription	hypothetical protein C3L33_11537, partial [Rhododendron williamsianum]
VaccDscaff10-processed-gene-0.7	9.70901	9.95571	10.3034	9.31639	7.86373	8.7368	8.79323	7.47423	8.07998	5.31646	4.90287	4.61218	3.86842	3.28735	4.39511	5.79357	4.60359	5.68832	0.759272	-0.0789177	normal	0.536485	-0.112881	normal	7.41e-09	-0.866933	normal	2.78e-12	-1.19524	down	4.6e-06	-0.731773	normal	--	--	K00895|3.7e-09|dct:110098534|K00895 diphosphate-dependent phosphofructokinase [EC:2.7.1.90] | (RefSeq) pyrophosphate--fructose 6-phosphate 1-phosphotransferase subunit alpha-like	--	C2 domain	Protein SRC2 OS=Glycine max OX=3847 GN=SRC2 PE=2 SV=1	Function unknown	hypothetical protein C3L33_11542, partial [Rhododendron williamsianum]
VaccDscaff10-processed-gene-100.8	2.61996	2.59013	2.70204	4.57061	6.77276	4.73863	5.14152	5.20455	4.41141	3.65349	4.16781	3.31232	3.86533	3.27968	3.17121	4.57015	3.59893	4.28155	0.000224485	1.0186	up	3.55e-05	1.04971	up	0.0500032	0.601006	normal	0.0970763	0.534122	normal	0.00440735	0.79027	normal	--	--	K19038|2.3e-59|egr:104424976|K19038 E3 ubiquitin-protein ligase ATL41 [EC:2.3.2.27] | (RefSeq) E3 ubiquitin-protein ligase ATL41	Posttranslational modification, protein turnover, chaperones	Ring finger domain	E3 ubiquitin-protein ligase ATL41 OS=Arabidopsis thaliana OX=3702 GN=ATL41 PE=1 SV=1	Posttranslational modification, protein turnover, chaperones	hypothetical protein C3L33_12032, partial [Rhododendron williamsianum]
VaccDscaff10-processed-gene-109.6	5.11513	3.74995	4.81868	4.60677	4.38611	4.4289	3.30988	5.2737	4.3358	2.52742	1.89978	1.49514	2.06461	1.57397	1.81743	1.61253	0.97844	0.923869	0.802387	0.0904342	normal	0.758079	0.0971433	normal	5.52e-05	-1.02996	down	2.22e-06	-1.13044	down	3.29e-10	-1.74018	down	Signal transduction mechanisms	Molecular Function: protein serine/threonine kinase activity (GO:0004674);; Molecular Function: ATP binding (GO:0005524);; Cellular Component: integral component of membrane (GO:0016021);; Molecular Function: carbohydrate binding (GO:0030246);;	K01180|4.5e-55|cmax:111487562|K01180 endo-1,3(4)-beta-glucanase [EC:3.2.1.6] | (RefSeq) uncharacterized protein LOC111487562	--	Protein kinase domain	G-type lectin S-receptor-like serine/threonine-protein kinase SD2-5 OS=Arabidopsis thaliana OX=3702 GN=SD25 PE=1 SV=1	Signal transduction mechanisms	G-type lectin S-receptor-like serine/threonine-protein kinase [Actinidia chinensis var. chinensis]
VaccDscaff10-processed-gene-110.1	0.479504	0.639135	0.422766	0.230026	0.255157	0.254901	0.850258	0.631948	0.51967	0.190406	0.146899	0.176596	0.182027	0.135141	0.260389	0.162982	0.178148	0.11727	0.111639	-0.700829	normal	0.200458	0.531438	normal	0.00591153	-1.23502	down	0.0239052	-1.10907	normal	0.00245749	-1.43203	down	Signal transduction mechanisms	Molecular Function: protein serine/threonine kinase activity (GO:0004674);; Molecular Function: ATP binding (GO:0005524);; Cellular Component: integral component of membrane (GO:0016021);; Molecular Function: carbohydrate binding (GO:0030246);;	K13459|2.0e-52|jcu:105634805|K13459 disease resistance protein RPS2 | (RefSeq) probable disease resistance protein At1g12280 isoform X1	--	Protein kinase domain	G-type lectin S-receptor-like serine/threonine-protein kinase SD2-5 OS=Arabidopsis thaliana OX=3702 GN=SD25 PE=1 SV=1	Signal transduction mechanisms	G-type lectin S-receptor-like serine/threonine-protein kinase [Actinidia chinensis var. chinensis]
VaccDscaff10-processed-gene-115.7	3.89819	3.41166	3.69186	7.49749	7.94951	7.66533	11.6069	10.9103	10.9026	11.3493	10.2734	9.8367	11.7264	11.3713	12.4953	12.6456	11.3608	12.2334	5.25e-16	1.15618	up	4.38e-43	1.77029	up	1.18e-33	1.62909	up	9.61e-44	1.83871	up	1.15e-48	1.86047	up	--	Molecular Function: molecular_function (GO:0003674);; Molecular Function: DNA binding (GO:0003677);; Molecular Function: transcription factor activity, sequence-specific DNA binding (GO:0003700);; Cellular Component: cellular_component (GO:0005575);; Cellular Component: intracellular (GO:0005622);; Cellular Component: cell (GO:0005623);; Cellular Component: nucleus (GO:0005634);; Cellular Compone…	K00521|2.0e-29|cmos:111447866|K00521 ferric-chelate reductase [EC:1.16.1.7] | (RefSeq) ferric reduction oxidase 7, chloroplastic-like	--	No apical meristem (NAM) protein	NAC domain-containing protein 87 OS=Arabidopsis thaliana OX=3702 GN=NAC087 PE=2 SV=1	Transcription	hypothetical protein C3L33_12090, partial [Rhododendron williamsianum]
[truncated: 16,420 more rows]

## Sheet: Table S3
Table S3 Statistics of functional annotation of differential expressed genes (DEGs)
DEG Set	Total	COG	GO	KEGG	KOG	NR	Pfam	Swiss-Prot	eggNOG
0h_vs_1h	2596	874	1984	1813	1219	2523	2272	2071	2175
0h_vs_3h	7550	2928	5908	5512	3991	7410	6574	5970	6423
0h_vs_6h	7162	2891	5597	5314	3813	7072	6317	5724	6089
0h_vs_12h	9462	3679	7353	6984	4936	9346	8288	7494	8152
0h_vs_24h	9953	3988	7796	7416	5215	9807	8792	7930	8643
Fold Change ≥ 2; FDR < 0.01
