# Supplementary material for: UV-B induces the expression of flavonoid biosynthetic pathways in blueberry (Vaccinium corymbosum) calli
Source: Frontiers journal article supplement (doi:10.3389/fpls.2022.1079087), 2022-11-22
Supplement: Data_Sheet_7.xls [file Data_Sheet_7.xls]

## Sheet: Table S4
Table S4 Function classification of consensus sequence of differential expressed genes (DEGs) under UV-B treatment
Function classification of consensus sequence	COG						eggNOG						KOG
	0h_vs_1h	0h_vs_3h	0h_vs_6h	0h_vs_12h	0h_vs_24h		0h_vs_1h	0h_vs_3h	0h_vs_6h	0h_vs_12h	0h_vs_24h		0h_vs_1h	0h_vs_3h	0h_vs_6h	0h_vs_12h	0h_vs_24h
RNA processing and modification	0	7	3	3	3		22	145	101	154	152		15	127	87	123	122
Chromatin structure and dynamics	0	1	2	0	0		2	22	49	35	57		5	29	60	33	55
Energy production and conversion	31	136	147	178	185		59	210	222	259	287		87	369	365	398	394
Cell cycle control, cell division, chromosome partitioning	20	72	100	99	107		3	33	51	59	61		12	71	101	104	101
Amino acid transport and metabolism	66	151	166	213	234		60	147	161	210	247		69	149	161	212	244
Nucleotide transport and metabolism	11	42	46	60	54		6	32	41	58	55		5	27	44	52	53
Carbohydrate transport and metabolism	135	390	381	499	536		128	367	383	551	569		96	426	410	503	510
Coenzyme transport and metabolism	49	120	127	169	173		42	76	60	81	91		15	31	34	48	55
Lipid transport and metabolism	57	189	197	265	295		68	164	150	214	235		75	215	170	240	264
Translation, ribosomal structure and biogenesis	13	90	65	100	111		16	90	74	125	117		5	51	37	76	70
Transcription	2	75	54	81	74		244	553	478	649	675		66	234	216	261	268
Replication, recombination and repair	22	110	127	96	124		35	172	205	206	237		8	85	131	79	120
Cell wall/membrane/envelope biogenesis	79	220	260	333	349		11	73	89	112	101		17	79	75	120	103
Cell motility	4	25	38	55	48		0	0	0	0	0		0	0	0	0	0
Posttranslational modification, protein turover, chaperones	109	381	367	411	459		224	642	593	726	792		206	602	552	655	702
Inorganic ion transport and metabolism	45	139	146	180	192		64	165	138	198	214		60	126	105	171	182
Secondary metabolites biosynthesis, transport and catabolism	91	332	297	376	436		132	448	445	574	650		113	398	377	471	535
General function prediction only	73	298	297	432	437		0	0	0	0	0		221	748	668	958	973
Function unknown	15	62	63	79	79		732	2145	1970	2680	2811		48	178	153	216	228
Signal transduction mechanisms	180	400	369	495	526		272	696	622	874	895		222	481	446	604	595
Intracellular trafficking, secretion, and vesicular transport	2	6	6	10	9		33	119	91	180	182		35	111	88	146	151
Defense mechanisms	66	232	211	254	285		19	61	57	77	105		15	47	35	44	71
Extracellular structures	1	10	7	12	13		0	1	1	1	1		9	25	11	24	20
Nuclear structure	0	0	0	0	0		0	0	0	1	0		2	8	5	4	5
Cytoskeleton	4	4	11	11	15		3	62	108	128	109		16	79	128	158	143

## Sheet: Table S5 
Table S5 Functional annotation of differential expressed genes (DEGs) under UV-B treatment in biological process, cellular component, and molecular function from Go database
0h_vs_1h																					0h_vs_3h																					0h_vs_6h
Biological process							Cellular component							Molecular function							Biological process							Cellular component							Molecular function							Biological process							Cellular component
GO.ID	Term	Annotated	Significant	Expected	KS		GO.ID	Term	Annotated	Significant	Expected	KS		GO.ID	Term	Annotated	Significant	Expected	KS		GO.ID	Term	Annotated	Significant	Expected	KS		GO.ID	Term	Annotated	Significant	Expected	KS		GO.ID	Term	Annotated	Significant	Expected	KS		GO.ID	Term	Annotated	Significant	Expected	KS		GO.ID
GO:0008150	biological_process	44998	1081	1081	1		GO:0005575	cellular_component	47695	1196	1196	1		GO:0003674	molecular_function	68353	1634	1634	1		GO:0008150	biological_process	44998	3124	3124	1		GO:0005575	cellular_component	47695	3317	3317	1		GO:0003674	molecular_function	68353	4945	4945	1		GO:0008150	biological_process	44998	3090	3090	1		GO:0005575
GO:0009987	cellular process	35680	788	857.15	0.99993		GO:0005623	cell	32174	723	806.8	0.99288		GO:0005488	binding	44944	1026	1074.4	1		GO:0009987	cellular process	35680	2323	2477.09	0.99993		GO:0005623	cell	32174	2065	2237.58	0.96948		GO:0005488	binding	44944	3137	3251.48	0.99998		GO:0009987	cellular process	35680	2358	2450.14	0.99931		GO:0005623
GO:0008152	metabolic process	32952	740	791.62	0.99996		GO:0044464	cell part	32174	723	806.8	0.99288		GO:0003824	catalytic activity	38641	984	923.73	0.00199		GO:0008152	metabolic process	32952	2229	2287.7	0.99988		GO:0044464	cell part	32174	2065	2237.58	0.96948		GO:0003824	catalytic activity	38641	2992	2795.48	0.00399		GO:0008152	metabolic process	32952	2176	2262.8	0.99978		GO:0044464
GO:0044699	single-organism process	26374	694	633.59	0.03321		GO:0016020	membrane	24448	671	613.06	0.11143		GO:0097159	organic cyclic compound binding	29078	684	695.12	0.99995		GO:0044699	single-organism process	26374	2035	1831.02	0.04285		GO:0016020	membrane	24448	1930	1700.26	0.00539		GO:0097159	organic cyclic compound binding	29078	2026	2103.65	0.99995		GO:0044699	single-organism process	26374	2006	1811.1	0.03305		GO:0005622
GO:0071704	organic substance metabolic process	29556	656	710.03	0.99995		GO:0005622	intracellular	29069	566	728.93	0.99944		GO:1901363	heterocyclic compound binding	29076	684	695.07	0.99995		GO:0071704	organic substance metabolic process	29556	1932	2051.93	0.99987		GO:0005622	intracellular	29069	1682	2021.63	0.99769		GO:1901363	heterocyclic compound binding	29076	2026	2103.5	0.99995		GO:0071704	organic substance metabolic process	29556	1824	2029.6	0.99974		GO:0044424
GO:0044238	primary metabolic process	28093	599	674.89	0.99995		GO:0044424	intracellular part	29007	564	727.38	0.99944		GO:0043167	ion binding	22363	601	534.59	0.99565		GO:0044238	primary metabolic process	28093	1811	1950.37	0.99986		GO:0044424	intracellular part	29007	1674	2017.32	0.99758		GO:0043167	ion binding	22363	1891	1617.85	0.64765		GO:0044238	primary metabolic process	28093	1723	1929.14	0.99971		GO:0016020
GO:0044237	cellular metabolic process	27423	581	658.79	0.99996		GO:0044425	membrane part	18708	500	469.12	0.85436		GO:0016740	transferase activity	16178	541	386.74	0.04563		GO:0044237	cellular metabolic process	27423	1710	1903.85	0.99984		GO:0043226	organelle	25258	1407	1756.59	0.99561		GO:0016740	transferase activity	16178	1478	1170.4	0.15305		GO:0044237	cellular metabolic process	27423	1657	1883.13	0.99966		GO:0043226
GO:0050896	response to stimulus	13274	568	318.89	0.63097		GO:0031224	intrinsic component of membrane	17179	491	430.78	0.43134		GO:0043168	anion binding	13546	360	323.82	0.07303		GO:0044763	single-organism cellular process	20216	1528	1403.5	0.17298		GO:0043229	intracellular organelle	25173	1406	1750.68	0.99777		GO:0043168	anion binding	13546	1189	979.99	0.11908		GO:0044763	single-organism cellular process	20216	1544	1388.23	0.17981		GO:0043229
GO:0044763	single-organism cellular process	20216	498	485.65	0.11875		GO:0016021	integral component of membrane	16810	476	421.53	0.00276		GO:0036094	small molecule binding	13426	354	320.95	0.11854		GO:0043170	macromolecule metabolic process	22223	1345	1542.84	0.99994		GO:0044425	membrane part	18708	1399	1301.07	0.30301		GO:0036094	small molecule binding	13426	1186	971.3	0.13502		GO:0043170	macromolecule metabolic process	22223	1289	1526.05	0.99993		GO:0043231
GO:0043170	macromolecule metabolic process	22223	465	533.87	1		GO:0043226	organelle	25258	457	633.37	0.92502		GO:0000166	nucleotide binding	13025	342	311.37	0.17732		GO:0050896	response to stimulus	13274	1295	921.55	0.37182		GO:0031224	intrinsic component of membrane	17179	1332	1194.73	0.07537		GO:0000166	nucleotide binding	13025	1126	942.29	0.19541		GO:0050896	response to stimulus	13274	1240	911.52	0.86155		GO:0043227
GO:0044260	cellular macromolecule metabolic process	20880	441	501.61	1		GO:0043229	intracellular organelle	25173	452	631.24	0.93747		GO:1901265	nucleoside phosphate binding	13025	342	311.37	0.17732		GO:0044260	cellular macromolecule metabolic process	20880	1260	1449.6	0.99993		GO:0043227	membrane-bounded organelle	23084	1322	1605.4	0.99935		GO:1901265	nucleoside phosphate binding	13025	1126	942.29	0.19541		GO:0044260	cellular macromolecule metabolic process	20880	1207	1433.82	0.9999		GO:0005737
GO:0006807	nitrogen compound metabolic process	19800	406	475.66	1		GO:0043227	membrane-bounded organelle	23084	446	578.85	0.98657		GO:0097367	carbohydrate derivative binding	12124	322	289.83	0.22876		GO:0006807	nitrogen compound metabolic process	19800	1218	1374.62	0.99993		GO:0043231	intracellular membrane-bounded organelle	23020	1321	1600.95	0.99933		GO:0097367	carbohydrate derivative binding	12124	1038	877.11	0.29658		GO:0006807	nitrogen compound metabolic process	19800	1158	1359.66	0.99894		GO:0044425
GO:0065007	biological regulation	15085	395	362.39	0.99262		GO:0043231	intracellular membrane-bounded organelle	23020	441	577.25	0.9929		GO:0001882	nucleoside binding	11902	313	284.52	0.38844		GO:0065007	biological regulation	15085	1098	1047.28	1		GO:0016021	integral component of membrane	16810	1292	1169.07	0.00016		GO:0032553	ribonucleotide binding	12014	1017	869.15	0.30054		GO:0065007	biological regulation	15085	1037	1035.88	1		GO:0031224
GO:0006950	response to stress	7844	389	188.44	0.5577		GO:0005737	cytoplasm	18223	347	456.96	0.06253		GO:0001883	purine nucleoside binding	11876	313	283.9	0.43174		GO:0050789	regulation of biological process	14066	1015	976.54	1		GO:0005737	cytoplasm	18223	1077	1267.34	0.07618		GO:0017076	purine nucleotide binding	11917	996	862.14	0.42386		GO:0044710	single-organism metabolic process	12770	1001	876.91	0.78461		GO:0016021
GO:0042221	response to chemical	6463	376	155.26	0.03477		GO:0005634	nucleus	12338	281	309.39	0.99803		GO:0017076	purine nucleotide binding	11917	313	284.88	0.34673		GO:0044710	single-organism metabolic process	12770	998	886.56	0.78399		GO:0044444	cytoplasmic part	15088	832	1049.31	0.11678		GO:0001882	nucleoside binding	11902	995	861.05	0.43818		GO:0050789	regulation of biological process	14066	952	965.91	1		GO:0044444
GO:0050789	regulation of biological process	14066	356	337.91	1		GO:0044444	cytoplasmic part	15088	255	378.35	0.10536		GO:0032549	ribonucleoside binding	11901	313	284.5	0.39132		GO:0009058	biosynthetic process	14687	923	1019.65	0.99997		GO:0005634	nucleus	12338	768	858.06	0.99988		GO:0001883	purine nucleoside binding	11876	995	859.17	0.45719		GO:0009058	biosynthetic process	14687	892	1008.55	0.99088		GO:0005634
GO:0009058	biosynthetic process	14687	318	352.83	0.9999		GO:0071944	cell periphery	6132	244	153.77	0.67451		GO:0032550	purine ribonucleoside binding	11876	313	283.9	0.43174		GO:1901576	organic substance biosynthetic process	14046	884	975.15	0.99997		GO:0071944	cell periphery	6132	625	426.46	0.02014		GO:0032549	ribonucleoside binding	11901	995	860.98	0.4389		GO:1901360	organic cyclic compound metabolic process	15385	870	1056.48	0.9998		GO:0044422
GO:1901576	organic substance biosynthetic process	14046	316	337.43	0.99781		GO:0005886	plasma membrane	4934	172	123.73	0.00054		GO:0032553	ribonucleotide binding	12014	313	287.2	0.28315		GO:1901360	organic cyclic compound metabolic process	15385	877	1068.11	0.99991		GO:0044422	organelle part	10813	511	752	0.32581		GO:0032550	purine ribonucleoside binding	11876	995	859.17	0.45719		GO:0050794	regulation of cellular process	12378	856	849.99	1		GO:0044446
GO:0050794	regulation of cellular process	12378	313	297.36	0.9915		GO:0044422	organelle part	10813	104	271.15	0.33501		GO:0032555	purine ribonucleotide binding	11890	313	284.23	0.38998		GO:0050794	regulation of cellular process	12378	876	859.35	0.99801		GO:0044446	intracellular organelle part	10712	507	744.98	0.33484		GO:0032555	purine ribonucleotide binding	11890	995	860.18	0.44687		GO:0006725	cellular aromatic compound metabolic process	15128	852	1038.84	0.99977		GO:0071944
GO:0010033	response to organic substance	4573	307	109.86	0.161		GO:0044446	intracellular organelle part	10712	102	268.61	0.34457		GO:0030554	adenyl nucleotide binding	10918	308	261	0.53245		GO:0034641	cellular nitrogen compound metabolic process	15144	867	1051.38	0.99991		GO:0005886	plasma membrane	4934	487	343.14	5.8e-05		GO:0030554	adenyl nucleotide binding	10918	971	789.86	0.42318		GO:1901576	organic substance biosynthetic process	14046	838	964.53	0.99877		GO:0005886
GO:0044249	cellular biosynthetic process	13719	300	329.58	0.99989		GO:0005576	extracellular region	1995	82	50.03	0.08195		GO:0032559	adenyl ribonucleotide binding	10906	308	260.71	0.41112		GO:0006725	cellular aromatic compound metabolic process	15128	845	1050.27	0.99991		GO:0032991	macromolecular complex	8175	297	568.54	0.77347		GO:0032559	adenyl ribonucleotide binding	10906	970	788.99	0.16197		GO:0034641	cellular nitrogen compound metabolic process	15144	816	1039.93	0.99979		GO:0032991
GO:0044710	single-organism metabolic process	12770	294	306.78	0.80362		GO:0009507	chloroplast	4226	77	105.97	0.41824		GO:0035639	purine ribonucleoside triphosphate binding	10355	295	247.54	0.43295		GO:0044249	cellular biosynthetic process	13719	842	952.45	0.99996		GO:0009536	plastid	4395	263	305.65	0.4492		GO:0035639	purine ribonucleoside triphosphate binding	10355	847	749.13	0.46466		GO:0044249	cellular biosynthetic process	13719	808	942.08	0.99863		GO:0043234
GO:1901700	response to oxygen-containing compound	3973	286	95.44	0.04254		GO:0009536	plastid	4395	77	110.21	0.41147		GO:0005524	ATP binding	9360	290	223.75	4.3e-06		GO:0046483	heterocycle metabolic process	14738	813	1023.19	0.99991		GO:0009507	chloroplast	4226	262	293.9	0.45467		GO:0005524	ATP binding	9360	821	677.15	6.9e-09		GO:0046483	heterocycle metabolic process	14738	780	1012.05	0.99978		GO:0009536
GO:0009719	response to endogenous stimulus	4007	277	96.26	0.05642		GO:0005829	cytosol	3738	68	93.73	0.48238		GO:0003676	nucleic acid binding	14794	265	353.66	0.99997		GO:0006950	response to stress	7844	807	544.57	0.83645		GO:0012505	endomembrane system	4021	255	279.64	0.01974		GO:0043169	cation binding	9891	769	715.56	0.90701		GO:0006950	response to stress	7844	776	538.65	0.4519		GO:0009507
GO:1901360	organic cyclic compound metabolic process	15385	274	369.6	1		GO:0012505	endomembrane system	4021	63	100.83	0.00623		GO:0016772	transferase activity, transferring phosphorus-containing groups	7937	265	189.74	0.93663		GO:0006139	nucleobase-containing compound metabolic process	13931	752	967.16	0.9999		GO:0043234	protein complex	5881	234	409	0.88164		GO:0005515	protein binding	11796	768	853.38	0.99201		GO:0006139	nucleobase-containing compound metabolic process	13931	717	956.64	0.99975		GO:0043228
GO:0006725	cellular aromatic compound metabolic process	15128	267	363.42	1		GO:0005618	cell wall	1286	59	32.25	0.00144		GO:0043169	cation binding	9891	263	236.45	0.99762		GO:0042221	response to chemical	6463	730	448.7	0.08099		GO:0005829	cytosol	3738	225	259.96	0.46551		GO:0046872	metal ion binding	9785	750	707.9	0.92989		GO:0042221	response to chemical	6463	692	443.81	0.05561		GO:0043232
GO:0034641	cellular nitrogen compound metabolic process	15144	258	363.81	1		GO:0030312	external encapsulating structure	1294	59	32.45	0.79642		GO:0046872	metal ion binding	9785	260	233.91	0.99753		GO:0090304	nucleic acid metabolic process	12680	688	880.31	0.99989		GO:0043228	non-membrane-bounded organelle	5076	212	353.02	0.74704		GO:0016787	hydrolase activity	13716	736	992.28	0.98931		GO:0090304	nucleic acid metabolic process	12680	654	870.73	0.99999		GO:0005829
GO:0046483	heterocycle metabolic process	14738	257	354.06	1		GO:0032991	macromolecular complex	8175	46	205	0.82708		GO:0016301	kinase activity	7110	252	169.97	0.49639		GO:0051716	cellular response to stimulus	7151	678	496.46	0.23076		GO:0043232	intracellular non-membrane-bounded organelle	5076	212	353.02	0.74704		GO:0003676	nucleic acid binding	14794	707	1070.27	0.99997		GO:0051716	cellular response to stimulus	7151	632	491.06	0.96278		GO:0012505
GO:0051716	cellular response to stimulus	7151	252	171.79	0.96341		GO:0005783	endoplasmic reticulum	1908	42	47.85	0.01615		GO:0016773	phosphotransferase activity, alcohol group as acceptor	6491	241	155.17	0.25715		GO:0019222	regulation of metabolic process	9088	659	630.94	0.99998		GO:0005911	cell-cell junction	1551	163	107.87	0.17118		GO:0016772	transferase activity, transferring phosphorus-containing groups	7937	651	574.2	0.90405		GO:0019222	regulation of metabolic process	9088	601	624.07	1		GO:0044434
GO:0019222	regulation of metabolic process	9088	250	218.32	0.94313		GO:0043234	protein complex	5881	42	147.47	0.92991		GO:0004672	protein kinase activity	6034	235	144.24	7e-06		GO:0010467	gene expression	11494	620	797.97	0.99986		GO:0030054	cell junction	1567	163	108.98	0.90249		GO:0016491	oxidoreductase activity	6333	627	458.16	5.9e-06		GO:0009059	macromolecule biosynthetic process	10218	599	701.67	0.99985		GO:0044435
GO:0009628	response to abiotic stimulus	4386	239	105.37	0.00099		GO:0031090	organelle membrane	3350	41	84	0.17145		GO:0001071	nucleic acid binding transcription factor activity	3494	224	83.53	1		GO:0009059	macromolecule biosynthetic process	10218	617	709.39	1		GO:0009506	plasmodesma	1492	158	103.76	0.00093		GO:0016301	kinase activity	7110	591	514.37	0.56144		GO:0009628	response to abiotic stimulus	4386	594	301.19	0.00255		GO:0005911
GO:0031323	regulation of cellular metabolic process	7959	228	191.2	0.8027		GO:0005911	cell-cell junction	1551	40	38.89	0.16666		GO:0003677	DNA binding	6537	224	156.27	0.99312		GO:0034645	cellular macromolecule biosynthetic process	10003	592	694.46	1		GO:0055044	symplast	1492	158	103.76	1		GO:0016773	phosphotransferase activity, alcohol group as acceptor	6491	555	469.59	0.21062		GO:0034645	cellular macromolecule biosynthetic process	10003	580	686.9	0.99991		GO:0030054
GO:1901362	organic cyclic compound biosynthetic process	8543	228	205.23	0.85651		GO:0009506	plasmodesma	1492	40	37.41	0.17674		GO:0003700	sequence-specific DNA binding transcription factor activity	3494	224	83.53	1.7e-06		GO:0016070	RNA metabolic process	10806	583	750.21	0.99986		GO:0005576	extracellular region	1995	157	138.74	0.11444		GO:0004672	protein kinase activity	6034	521	436.53	3.9e-06		GO:0032502	developmental process	6765	553	464.55	0.05275		GO:0031090
GO:0060255	regulation of macromolecule metabolic process	8039	226	193.12	0.68868		GO:0030054	cell junction	1567	40	39.29	0.19091		GO:0016787	hydrolase activity	13716	221	327.89	0.95967		GO:0060255	regulation of macromolecule metabolic process	8039	577	558.11	0.90658		GO:0031090	organelle membrane	3350	157	232.98	0.39199		GO:0046914	transition metal ion binding	5601	465	405.2	0.99931		GO:1901564	organonitrogen compound metabolic process	7926	546	544.28	0.13438		GO:0005576
GO:0006139	nucleobase-containing compound metabolic process	13931	224	334.67	1		GO:0048046	apoplast	727	40	18.23	0.20564		GO:0016491	oxidoreductase activity	6333	191	151.39	0.00021		GO:1901362	organic cyclic compound biosynthetic process	8543	568	593.1	0.99914		GO:0043233	organelle lumen	3269	157	227.35	0.7788		GO:0003677	DNA binding	6537	444	472.92	0.99998		GO:0010467	gene expression	11494	545	789.29	0.99999		GO:0009506
GO:0019438	aromatic compound biosynthetic process	8253	223	198.26	0.78336		GO:0055044	symplast	1492	40	37.41	0.17674		GO:0005515	protein binding	11796	180	281.99	0.99071		GO:1901564	organonitrogen compound metabolic process	7926	561	550.26	0.17557		GO:0070013	intracellular organelle lumen	3269	157	227.35	0.7788		GO:0016757	transferase activity, transferring glycosyl groups	2481	380	179.49	0.31067		GO:0071840	cellular component organization or biogenesis	8046	539	552.52	0.72642		GO:0055044
GO:0080090	regulation of primary metabolic process	7816	222	187.77	0.67113		GO:0043228	non-membrane-bounded organelle	5076	35	127.29	0.77484		GO:0043565	sequence-specific DNA binding	2030	140	48.53	1.8e-06		GO:0031323	regulation of cellular metabolic process	7959	560	552.56	0.93639		GO:0031974	membrane-enclosed lumen	3286	157	228.53	0.78109		GO:0001071	nucleic acid binding transcription factor activity	3494	359	252.77	1		GO:1901362	organic cyclic compound biosynthetic process	8543	538	586.65	0.98881		GO:0030312
GO:0044271	cellular nitrogen compound biosynthetic process	8404	222	201.89	0.84616		GO:0043232	intracellular non-membrane-bounded organelle	5076	35	127.29	0.77484		GO:0046914	transition metal ion binding	5601	123	133.89	0.99887		GO:0019538	protein metabolic process	9655	554	670.3	0.47274		GO:0030312	external encapsulating structure	1294	151	89.99	0.07958		GO:0003700	sequence-specific DNA binding transcription factor activity	3494	359	252.77	2.1e-05		GO:0044767	single-organism developmental process	6488	533	445.53	0.09191		GO:0005618
GO:0051171	regulation of nitrogen compound metabolic process	7492	220	179.98	0.55237		GO:0044459	plasma membrane part	1082	34	27.13	0.34958		GO:0005215	transporter activity	4265	121	101.96	0.1622		GO:0010033	response to organic substance	4573	548	317.48	0.14801		GO:0044428	nuclear part	3687	150	256.42	0.73227		GO:0005215	transporter activity	4265	323	308.55	0.2428		GO:0031323	regulation of cellular metabolic process	7959	531	546.54	0.99952		GO:0044428
GO:0018130	heterocycle biosynthetic process	8065	219	193.75	0.80007		GO:0005739	mitochondrion	2430	32	60.93	0.63161		GO:0022857	transmembrane transporter activity	4009	117	95.84	0.00013		GO:0044271	cellular nitrogen compound biosynthetic process	8404	544	583.45	0.99685		GO:0005618	cell wall	1286	144	89.44	0.08054		GO:0022857	transmembrane transporter activity	4009	307	290.03	0.00076		GO:0019538	protein metabolic process	9655	521	663.01	0.46267		GO:0031975
GO:0090304	nucleic acid metabolic process	12680	219	304.62	1		GO:0031967	organelle envelope	2002	29	50.2	0.61798		GO:0004674	protein serine/threonine kinase activity	2750	114	65.74	1.2e-07		GO:0009628	response to abiotic stimulus	4386	544	304.5	0.01112		GO:0005783	endoplasmic reticulum	1908	137	132.69	0.01336		GO:0008194	UDP-glycosyltransferase activity	1209	245	87.47	3.6e-20		GO:0016043	cellular component organization	7348	520	504.59	0.79215		GO:0031967
GO:0009059	macromolecule biosynthetic process	10218	218	245.47	0.99926		GO:0031975	envelope	2010	29	50.4	0.61498		GO:0016757	transferase activity, transferring glycosyl groups	2481	114	59.31	0.18068		GO:0080090	regulation of primary metabolic process	7816	537	542.63	0.9336		GO:0031981	nuclear lumen	2954	129	205.44	0.8908		GO:0016817	hydrolase activity, acting on acid anhydrides	3431	235	248.22	0.77801		GO:0032501	multicellular organismal process	6741	518	462.9	0.21365		GO:0031974
GO:0010467	gene expression	11494	218	276.12	1		GO:0005773	vacuole	1584	28	39.72	0.36544		GO:0004842	ubiquitin-protein transferase activity	1681	82	40.18	0.03316		GO:0051171	regulation of nitrogen compound metabolic process	7492	537	520.13	0.98201		GO:0098588	bounding membrane of organelle	2588	118	179.99	0.35389		GO:0016818	hydrolase activity, acting on acid anhydrides, in phosphorus-containing anhydrides	3422	235	247.56	0.79531		GO:0048856	anatomical structure development	6227	517	427.61	0.0409		GO:0043233
GO:0009725	response to hormone	3640	215	87.44	0.01759		GO:0031226	intrinsic component of plasma membrane	684	27	17.15	0.52715		GO:0022892	substrate-specific transporter activity	2490	75	59.52	0.01553		GO:0019438	aromatic compound biosynthetic process	8253	534	572.97	0.99871		GO:0044435	plastid part	2285	115	158.91	0.57371		GO:0016462	pyrophosphatase activity	3374	231	244.09	0.64121		GO:0019438	aromatic compound biosynthetic process	8253	511	566.73	0.98595		GO:0070013
GO:0034645	cellular macromolecule biosynthetic process	10003	210	240.3	0.99934		GO:0031974	membrane-enclosed lumen	3286	25	82.4	0.49307		GO:0016798	hydrolase activity, acting on glycosyl bonds	1524	74	36.43	0.09621		GO:0044267	cellular protein metabolic process	8856	529	614.83	0.72831		GO:0044434	chloroplast part	2256	115	156.9	0.57583		GO:0017111	nucleoside-triphosphatase activity	3216	227	232.66	0.36379		GO:0060255	regulation of macromolecule metabolic process	8039	507	552.04	1		GO:0005783
GO:1901564	organonitrogen compound metabolic process	7926	209	190.41	0.11951		GO:0043233	organelle lumen	3269	25	81.97	0.492		GO:0004553	hydrolase activity, hydrolyzing O-glycosyl compounds	1404	73	33.56	0.0742		GO:0018130	heterocycle biosynthetic process	8065	529	559.92	0.99161		GO:0005773	vacuole	1584	114	110.16	0.26976		GO:0004674	protein serine/threonine kinase activity	2750	224	198.95	3e-06		GO:0016070	RNA metabolic process	10806	505	742.04	0.99998		GO:0005856
GO:0010468	regulation of gene expression	7301	207	175.39	0.57039		GO:0044434	chloroplast part	2256	25	56.57	0.52067		GO:0030246	carbohydrate binding	1677	73	40.09	0.00375		GO:0032502	developmental process	6765	523	469.66	0.12387		GO:0044459	plasma membrane part	1082	103	75.25	0.20268		GO:0046906	tetrapyrrole binding	1951	210	141.15	0.18206		GO:0044267	cellular protein metabolic process	8856	495	608.14	0.68227		GO:0098588
GO:0016070	RNA metabolic process	10806	207	259.6	0.99949		GO:0044435	plastid part	2285	25	57.3	0.53046		GO:0022891	substrate-specific transmembrane transporter activity	2280	70	54.5	0.03989		GO:0010468	regulation of gene expression	7301	512	506.87	0.93376		GO:0005794	Golgi apparatus	1664	98	115.72	0.16444		GO:0020037	heme binding	1870	204	135.29	1.1e-08		GO:0051171	regulation of nitrogen compound metabolic process	7492	495	514.47	0.99919		GO:0031981
GO:0009889	regulation of biosynthetic process	6745	203	162.04	0.41743		GO:0070013	intracellular organelle lumen	3269	25	81.97	0.492		GO:0016788	hydrolase activity, acting on ester bonds	5695	67	136.14	0.84865		GO:0032501	multicellular organismal process	6741	510	468	0.33756		GO:0031975	envelope	2010	95	139.79	0.62964		GO:0043565	sequence-specific DNA binding	2030	199	146.86	0.00055		GO:0080090	regulation of primary metabolic process	7816	494	536.72	1		GO:0031984
GO:0007154	cell communication	5257	202	126.29	0.34294		GO:0005794	Golgi apparatus	1664	23	41.73	0.13113		GO:0020037	heme binding	1870	67	44.7	3.5e-06		GO:0048856	anatomical structure development	6227	499	432.31	0.07541		GO:0005739	mitochondrion	2430	92	169	0.6508		GO:0016705	oxidoreductase activity, acting on paired donors, with incorporation or reduction of molecular oxygen	1834	192	132.68	5.7e-06		GO:0010033	response to organic substance	4573	488	314.03	0.12492		GO:0044430
GO:0031326	regulation of cellular biosynthetic process	6637	202	159.44	0.41359		GO:0031984	organelle subcompartment	1627	23	40.8	0.54093		GO:0046906	tetrapyrrole binding	1951	67	46.64	0.24298		GO:1901700	response to oxygen-containing compound	3973	496	275.83	0.08805		GO:1902494	catalytic complex	2127	90	147.92	0.84562		GO:0008270	zinc ion binding	3167	191	229.12	0.99997		GO:0044271	cellular nitrogen compound biosynthetic process	8404	488	577.1	0.99994		GO:0015630
GO:0034654	nucleobase-containing compound biosynthetic process	7424	195	178.35	0.72466		GO:0044428	nuclear part	3687	23	92.46	0.55318		GO:0016874	ligase activity	2083	66	49.79	0.59909		GO:0044767	single-organism developmental process	6488	495	450.43	0.18831		GO:0031967	organelle envelope	2002	88	139.23	0.62981		GO:0005506	iron ion binding	1738	190	125.74	9.8e-07		GO:0044707	single-multicellular organism process	6498	484	446.22	0.21287		GO:0005794
GO:0019219	regulation of nucleobase-containing compound metabolic process	6624	194	159.13	0.43685		GO:0005740	mitochondrial envelope	787	21	19.73	0.51459		GO:0005509	calcium ion binding	1104	64	26.39	0.00036		GO:0007154	cell communication	5257	490	364.97	0.16747		GO:0005856	cytoskeleton	1037	77	72.12	0.52736		GO:0048037	cofactor binding	1689	187	122.19	0.27021		GO:0018130	heterocycle biosynthetic process	8065	484	553.82	0.99955		GO:0009532
GO:0032774	RNA biosynthetic process	6606	193	158.7	0.44636		GO:0031966	mitochondrial membrane	752	21	18.86	0.54117		GO:0015075	ion transmembrane transporter activity	1977	62	47.26	0.02611		GO:0034654	nucleobase-containing compound biosynthetic process	7424	487	515.41	0.97271		GO:0009505	plant-type cell wall	452	75	31.43	0.00014		GO:0016788	hydrolase activity, acting on ester bonds	5695	184	412	0.99963		GO:0007275	multicellular organismal development	5745	453	394.51	0.0915		GO:0009570
GO:0010556	regulation of macromolecule biosynthetic process	6408	192	153.94	0.42119		GO:0044429	mitochondrial part	973	21	24.4	0.44246		GO:0016705	oxidoreductase activity, acting on paired donors, with incorporation or reduction of molecular oxygen	1834	61	43.84	0.00029		GO:0044707	single-multicellular organism process	6498	479	451.13	0.29401		GO:0005654	nucleoplasm	1593	74	110.79	0.61551		GO:0030246	carbohydrate binding	1677	180	121.32	0.00017		GO:1901700	response to oxygen-containing compound	3973	451	272.82	0.07116		GO:0005773
GO:0001101	response to acid chemical	2833	191	68.06	0.01635		GO:0005743	mitochondrial inner membrane	617	20	15.47	0.42769		GO:0016758	transferase activity, transferring hexosyl groups	1116	61	26.68	0.13707		GO:0009719	response to endogenous stimulus	4007	479	278.19	0.04379		GO:0048046	apoplast	727	72	50.56	0.20991		GO:0022892	substrate-specific transporter activity	2490	171	180.14	0.20077		GO:0010468	regulation of gene expression	7301	448	501.36	0.99995		GO:1902494
GO:2001141	regulation of RNA biosynthetic process	5968	191	143.37	0.27398		GO:0019866	organelle inner membrane	731	20	18.33	0.64157		GO:0016879	ligase activity, forming carbon-nitrogen bonds	1556	61	37.2	0.54798		GO:0009889	regulation of biosynthetic process	6745	472	468.27	0.84885		GO:0009570	chloroplast stroma	1229	66	85.47	0.70498		GO:0003723	RNA binding	5766	167	417.14	0.03666		GO:0009889	regulation of biosynthetic process	6745	442	463.18	0.99944		GO:0009579
GO:0051252	regulation of RNA metabolic process	6168	191	148.18	0.33959		GO:0031981	nuclear lumen	2954	20	74.07	0.69971		GO:0016881	acid-amino acid ligase activity	1400	61	33.47	0.31866		GO:0031326	regulation of cellular biosynthetic process	6637	466	460.78	0.85452		GO:0009532	plastid stroma	1243	66	86.45	0.71785		GO:0022891	substrate-specific transmembrane transporter activity	2280	159	164.95	0.35488		GO:0034654	nucleobase-containing compound biosynthetic process	7424	440	509.8	0.99996		GO:0009526
GO:0006351	transcription, DNA-templated	6536	189	157.02	0.46537		GO:0044421	extracellular region part	602	20	15.1	0.3728		GO:0019787	small conjugating protein ligase activity	1341	60	32.06	0.00305		GO:0019219	regulation of nucleobase-containing compound metabolic process	6624	459	459.87	0.85394		GO:0031984	organelle subcompartment	1627	66	113.15	0.75746		GO:0016798	hydrolase activity, acting on glycosyl bonds	1524	157	110.25	0.10011		GO:0031326	regulation of cellular biosynthetic process	6637	432	455.76	0.9995		GO:0009941
GO:0009605	response to external stimulus	3214	189	77.21	0.8386		GO:0005938	cell cortex	295	19	7.4	0.72663		GO:0005506	iron ion binding	1738	56	41.55	0.00012		GO:0032774	RNA biosynthetic process	6606	458	458.62	0.86546		GO:1990234	transferase complex	1300	65	90.41	0.98804		GO:0016887	ATPase activity	1843	155	133.33	0.01166		GO:0019219	regulation of nucleobase-containing compound metabolic process	6624	430	454.87	0.99942		GO:0005739
GO:2000112	regulation of cellular macromolecule biosynthetic process	6339	188	152.28	0.44043		GO:0009505	plant-type cell wall	452	18	11.33	0.01696		GO:0022804	active transmembrane transporter activity	1547	55	36.98	0.19557		GO:0010556	regulation of macromolecule biosynthetic process	6408	446	444.88	0.82334		GO:0044430	cytoskeletal part	880	63	61.2	0.31536		GO:0004553	hydrolase activity, hydrolyzing O-glycosyl compounds	1404	150	101.57	0.06853		GO:0009719	response to endogenous stimulus	4007	428	275.16	0.07602		GO:0044459
GO:0019538	protein metabolic process	9655	187	231.94	0.00964		GO:0009532	plastid stroma	1243	18	31.17	0.48649		GO:0016817	hydrolase activity, acting on acid anhydrides	3431	51	82.02	0.96447		GO:0006351	transcription, DNA-templated	6536	445	453.76	0.91043		GO:0030529	ribonucleoprotein complex	2371	59	164.89	0.51897		GO:0016758	transferase activity, transferring hexosyl groups	1116	145	80.74	0.00994		GO:0007154	cell communication	5257	427	361	0.17453		GO:0005694
GO:0006355	regulation of transcription, DNA-templated	5912	187	142.03	0.29579		GO:0009570	chloroplast stroma	1229	18	30.82	0.43631		GO:0016818	hydrolase activity, acting on acid anhydrides, in phosphorus-containing anhydrides	3422	51	81.8	0.96484		GO:0071840	cellular component organization or biogenesis	8046	444	558.6	0.6309		GO:0031226	intrinsic component of plasma membrane	684	58	47.57	0.59944		GO:0016746	transferase activity, transferring acyl groups	1624	142	117.49	0.26679		GO:0051179	localization	6905	424	474.16	0.11612		GO:0034357
GO:0032502	developmental process	6765	182	162.52	0.35139		GO:0031225	anchored component of membrane	389	18	9.75	0.44772		GO:0008194	UDP-glycosyltransferase activity	1209	50	28.9	0.0322		GO:0051252	regulation of RNA metabolic process	6168	435	428.22	0.7631		GO:0098589	membrane region	1097	55	76.29	0.28284		GO:0050662	coenzyme binding	1180	141	85.37	0.16887		GO:0010556	regulation of macromolecule biosynthetic process	6408	416	440.04	0.99659		GO:0044436
GO:0044267	cellular protein metabolic process	8856	180	212.75	0.14157		GO:0044448	cell cortex part	222	18	5.57	0.94341		GO:0000975	regulatory region DNA binding	900	49	21.51	1		GO:0043412	macromolecule modification	7513	434	521.59	0.66781		GO:0005774	vacuolar membrane	884	54	61.48	0.0338		GO:0016874	ligase activity	2083	135	150.69	0.27741		GO:2000112	regulation of cellular macromolecule biosynthetic process	6339	410	435.3	0.99738		GO:0042651
GO:0051704	multi-organism process	3536	178	84.95	0.22651		GO:0000145	exocyst	129	16	3.23	0.00108		GO:0001067	regulatory region nucleic acid binding	900	49	21.51	1		GO:0007275	multicellular organismal development	5745	434	398.85	0.14521		GO:0015630	microtubule cytoskeleton	723	54	50.28	0.04507		GO:0043531	ADP binding	1491	135	107.87	0.00064		GO:0032774	RNA biosynthetic process	6606	408	453.63	0.99957		GO:0009505
GO:0048856	anatomical structure development	6227	177	149.59	0.34528		GO:0098588	bounding membrane of organelle	2588	16	64.9	0.33447		GO:0044212	transcription regulatory region DNA binding	900	49	21.51	0.00193		GO:2000112	regulation of cellular macromolecule biosynthetic process	6339	433	440.09	0.8966		GO:0044437	vacuolar part	900	54	62.59	0.05303		GO:0004842	ubiquitin-protein transferase activity	1681	132	121.61	0.51874		GO:0006351	transcription, DNA-templated	6536	400	448.83	0.99951		GO:0009534
GO:0032501	multicellular organismal process	6741	173	161.94	0.60627		GO:1902494	catalytic complex	2127	16	53.34	0.89066		GO:0016462	pyrophosphatase activity	3374	47	80.66	0.9668		GO:2001141	regulation of RNA biosynthetic process	5968	431	414.33	0.69345		GO:0044432	endoplasmic reticulum part	950	52	66.07	0.43117		GO:0015075	ion transmembrane transporter activity	1977	128	143.03	0.00091		GO:0009725	response to hormone	3640	393	249.96	0.01232		GO:0031976
GO:0042493	response to drug	1181	172	28.37	1.3e-16		GO:1990234	transferase complex	1300	16	32.6	0.90209		GO:0017111	nucleoside-triphosphatase activity	3216	47	76.88	0.85146		GO:0051179	localization	6905	428	479.38	0.35417		GO:0009579	thylakoid	992	52	68.99	0.88608		GO:0016747	transferase activity, transferring acyl groups other than amino-acyl groups	1359	122	98.32	0.10522		GO:0051234	establishment of localization	6440	393	442.23	0.25768		GO:0048046
GO:0006952	defense response	2739	172	65.8	0.00039		GO:0005887	integral component of plasma membrane	379	14	9.5	0.03026		GO:0008270	zinc ion binding	3167	46	75.71	1		GO:0016043	cellular component organization	7348	424	510.14	0.69218		GO:0005694	chromosome	1251	52	87	0.9323		GO:0030234	enzyme regulator activity	1397	121	101.07	0.56139		GO:0043412	macromolecule modification	7513	392	515.92	0.65936		GO:0055035
GO:0044767	single-organism developmental process	6488	172	155.86	0.42301		GO:0031982	vesicle	1092	14	27.38	0.4476		GO:0048037	cofactor binding	1689	43	40.38	0.27393		GO:0009725	response to hormone	3640	419	252.71	0.02138		GO:0005730	nucleolus	1240	50	86.24	0.65323		GO:0004497	monooxygenase activity	1293	119	93.54	0.0009		GO:0051252	regulation of RNA metabolic process	6168	392	423.55	0.99187		GO:0005875
GO:0051179	localization	6905	170	165.88	0.34103		GO:0044431	Golgi apparatus part	929	14	23.3	0.32957		GO:0016887	ATPase activity	1843	41	44.06	0.09528		GO:0006355	regulation of transcription, DNA-templated	5912	418	410.44	0.79724		GO:0009526	plastid envelope	1074	46	74.69	0.76645		GO:0022804	active transmembrane transporter activity	1547	115	111.92	0.0061		GO:0006810	transport	6370	390	437.43	0.29463		GO:0009535
GO:0044707	single-multicellular organism process	6498	167	156.1	0.62379		GO:0046658	anchored component of plasma membrane	306	14	7.67	0.56883		GO:0042578	phosphoric ester hydrolase activity	1055	41	25.22	0.43793		GO:0044700	single organism signaling	4295	402	298.18	0.03739		GO:0009941	chloroplast envelope	1037	45	72.12	0.7832		GO:0016879	ligase activity, forming carbon-nitrogen bonds	1556	111	112.57	0.08156		GO:2001141	regulation of RNA biosynthetic process	5968	387	409.82	0.98458		GO:0044427
GO:0009607	response to biotic stimulus	2231	165	53.6	0.02121		GO:0005730	nucleolus	1240	13	31.09	0.39406		GO:0061630	ubiquitin protein ligase activity	664	39	15.87	0.0001		GO:0023052	signaling	4296	402	298.25	0.03989		GO:0031225	anchored component of membrane	389	43	27.05	0.12031		GO:0016881	acid-amino acid ligase activity	1400	103	101.28	0.06428		GO:0006355	regulation of transcription, DNA-templated	5912	381	405.98	0.98763		GO:0098589
GO:0043412	macromolecule modification	7513	161	180.49	0.04861		GO:0000151	ubiquitin ligase complex	563	11	14.12	0.29651		GO:0008509	anion transmembrane transporter activity	1042	38	24.91	0.2948		GO:0051234	establishment of localization	6440	400	447.1	0.42828		GO:0044436	thylakoid part	785	43	54.59	0.86575		GO:0019787	small conjugating protein ligase activity	1341	103	97.01	0.04328		GO:0044700	single organism signaling	4295	363	294.94	0.02864		GO:1990234
GO:0070887	cellular response to chemical stimulus	3084	161	74.09	0.22733		GO:0018995	host	356	11	8.93	0.44127		GO:0015103	inorganic anion transmembrane transporter activity	850	38	20.32	0.21713		GO:0006810	transport	6370	397	442.24	0.4555		GO:0034357	photosynthetic membrane	719	40	50	0.78232		GO:0008233	peptidase activity	2073	102	149.97	0.74129		GO:0023052	signaling	4296	363	295.01	0.03054		GO:0005654
GO:0051234	establishment of localization	6440	159	154.71	0.446		GO:0019005	SCF ubiquitin ligase complex	187	11	4.69	0.04657		GO:0004871	signal transducer activity	742	34	17.74	0.13767		GO:0007165	signal transduction	4188	393	290.75	0.06832		GO:0044427	chromosomal part	1047	40	72.81	0.91341		GO:0070011	peptidase activity, acting on L-amino acid peptides	1944	100	140.64	0.68612		GO:0006464	cellular protein modification process	5464	358	375.21	0.77434		GO:0044432
GO:0006810	transport	6370	159	153.03	0.46815		GO:0031461	cullin-RING ubiquitin ligase complex	441	11	11.06	0.65325		GO:0060089	molecular transducer activity	742	34	17.74	0.13767		GO:0036211	protein modification process	5464	389	379.34	0.76693		GO:0044451	nucleoplasm part	1020	40	70.94	0.99395		GO:0042623	ATPase activity, coupled	1352	98	97.81	0.10101		GO:0036211	protein modification process	5464	358	375.21	0.77434		GO:0005874
GO:0043207	response to external biotic stimulus	2152	155	51.7	0.08183		GO:0033643	host cell part	356	11	8.93	0.44127		GO:0015114	phosphate ion transmembrane transporter activity	733	32	17.52	0.98533		GO:0006464	cellular protein modification process	5464	389	379.34	0.76693		GO:0044429	mitochondrial part	973	39	67.67	0.47873		GO:0016829	lyase activity	1274	94	92.17	0.47837		GO:0007165	signal transduction	4188	353	287.59	0.0558		GO:0005774
GO:0006464	cellular protein modification process	5464	155	131.26	0.1639		GO:0033646	host intracellular part	335	11	8.4	0.36976		GO:0015318	inorganic solute uptake transmembrane transporter activity	730	32	17.45	0.00213		GO:0001101	response to acid chemical	2833	368	196.68	0.0093		GO:0046658	anchored component of plasma membrane	306	38	21.28	0.07597		GO:0046983	protein dimerization activity	2234	92	161.62	0.99999		GO:0009056	catabolic process	4542	351	311.9	0.28618		GO:0044437
GO:0036211	protein modification process	5464	155	131.26	0.1639		GO:0033647	host intracellular organelle	335	11	8.4	0.36976		GO:0015563	uptake transmembrane transporter activity	730	32	17.45	1		GO:0048731	system development	4594	356	318.94	0.19444		GO:0042651	thylakoid membrane	673	38	46.8	0.91099		GO:0008509	anion transmembrane transporter activity	1042	86	75.38	0.04167		GO:0048731	system development	4594	346	315.47	0.1698		GO:0031226
GO:0044700	single organism signaling	4295	152	103.18	0.2343		GO:0033648	host intracellular membrane-bounded organelle	335	11	8.4	0.36976		GO:0016829	lyase activity	1274	32	30.46	0.51975		GO:0044711	single-organism biosynthetic process	4852	355	336.85	0.15165		GO:0031982	vesicle	1092	37	75.94	0.65937		GO:0004518	nuclease activity	3555	83	257.19	0.99978		GO:0044711	single-organism biosynthetic process	4852	343	333.19	0.09065		GO:0030529
GO:0023052	signaling	4296	152	103.2	0.24407		GO:0042025	host cell nucleus	335	11	8.4	0.36976		GO:0050662	coenzyme binding	1180	32	28.21	0.19696		GO:0044765	single-organism transport	5261	347	365.25	0.40887		GO:0031410	cytoplasmic vesicle	1034	36	71.91	0.65751		GO:0008092	cytoskeletal protein binding	891	82	64.46	0.08562		GO:0044765	single-organism transport	5261	343	361.27	0.14848		GO:0032993
GO:0007275	multicellular organismal development	5745	152	138.01	0.54092		GO:0043245	extraorganismal space	356	11	8.93	0.44127		GO:0015291	secondary active transmembrane transporter activity	772	31	18.45	0.0047		GO:0070887	cellular response to chemical stimulus	3084	346	214.11	0.14804		GO:0005875	microtubule associated complex	260	35	18.08	0.06059		GO:0032403	protein complex binding	698	82	50.5	0.01258		GO:0001101	response to acid chemical	2833	337	194.54	0.05476		GO:0044429
GO:0051707	response to other organism	2141	151	51.43	0.28194		GO:0043656	intracellular region of host	335	11	8.4	0.36976		GO:0016746	transferase activity, transferring acyl groups	1624	31	38.82	0.27345		GO:0051704	multi-organism process	3536	341	245.49	0.13204		GO:0044421	extracellular region part	602	35	41.87	0.53426		GO:0004871	signal transducer activity	742	79	53.68	0.12807		GO:0051704	multi-organism process	3536	329	242.82	0.03792		GO:0031982
GO:0007165	signal transduction	4188	148	100.61	0.30738		GO:0043657	host cell	356	11	8.93	0.44127		GO:0001871	pattern binding	546	29	13.05	1		GO:0009056	catabolic process	4542	334	315.33	0.73994		GO:0009534	chloroplast thylakoid	707	35	49.17	0.89847		GO:0060089	molecular transducer activity	742	79	53.68	0.12807		GO:0044281	small molecule metabolic process	4958	322	340.46	0.06458		GO:0005789
GO:0044765	single-organism transport	5261	145	126.39	0.32617		GO:0044215	other organism	356	11	8.93	0.44127		GO:0030247	polysaccharide binding	546	29	13.05	7.4e-05		GO:0044281	small molecule metabolic process	4958	331	344.21	0.14896		GO:0031976	plastid thylakoid	707	35	49.17	0.89847		GO:0050660	flavin adenine dinucleotide binding	536	78	38.78	0.0001		GO:0070887	cellular response to chemical stimulus	3084	320	211.78	0.12558		GO:0042175
GO:0097305	response to alcohol	1629	138	39.13	0.16634		GO:0044216	other organism cell	356	11	8.93	0.44127		GO:0005516	calmodulin binding	351	28	8.39	0.00851		GO:0009605	response to external stimulus	3214	326	223.13	0.35818		GO:0005789	endoplasmic reticulum membrane	877	31	60.99	0.32074		GO:0004175	endopeptidase activity	1075	77	77.77	0.33808		GO:0055114	oxidation-reduction process	2952	317	202.71	1.4e-08		GO:0031410
GO:0010035	response to inorganic substance	2273	129	54.6	0.01021		GO:0044217	other organism part	356	11	8.93	0.44127		GO:0016747	transferase activity, transferring acyl groups other than amino-acyl groups	1359	28	32.49	0.12608		GO:0005975	carbohydrate metabolic process	3464	322	240.49	0.13296		GO:0042175	nuclear outer membrane-endoplasmic reticulum membrane network	883	31	61.41	0.35217		GO:0016741	transferase activity, transferring one-carbon groups	1315	77	95.13	0.4636		GO:0005975	carbohydrate metabolic process	3464	314	237.87	0.11173		GO:0005871
GO:0033993	response to lipid	1748	129	41.99	0.09842		GO:0005654	nucleoplasm	1593	10	39.95	0.52701		GO:0016791	phosphatase activity	847	28	20.25	0.13523		GO:0048519	negative regulation of biological process	3631	315	252.08	0.56508		GO:0005740	mitochondrial envelope	787	31	54.73	0.57722		GO:0008168	methyltransferase activity	1273	76	92.1	0.35229		GO:0009605	response to external stimulus	3214	301	220.7	0.10814		GO:0044431
GO:0048731	system development	4594	128	110.36	0.56384		GO:0031410	cytoplasmic vesicle	1034	10	25.93	0.46262		GO:0004497	monooxygenase activity	1293	26	30.91	0.00348		GO:0006952	defense response	2739	295	190.16	0.0036		GO:0031966	mitochondrial membrane	752	31	52.3	0.59287		GO:0019899	enzyme binding	1117	76	80.81	0.47067		GO:0022414	reproductive process	3999	299	274.61	0.08187		GO:0044421
GO:1901698	response to nitrogen compound	1138	123	27.34	0.74128		GO:0032153	cell division site	49	10	1.23	0.0431		GO:0008324	cation transmembrane transporter activity	1239	26	29.62	0.19632		GO:0006796	phosphate-containing compound metabolic process	4240	292	294.36	0.75877		GO:0055035	plastid thylakoid membrane	579	31	40.27	0.87444		GO:0004857	enzyme inhibitor activity	839	75	60.7	0.6575		GO:1901575	organic substance catabolic process	3966	294	272.34	0.69912		GO:0005740
GO:0098542	defense response to other organism	1666	117	40.02	0.00091		GO:0032155	cell division site part	45	10	1.13	0.03014		GO:0016762	xyloglucan:xyloglucosyl transferase activity	121	26	2.89	0.00012		GO:0006793	phosphorus metabolic process	4297	292	298.32	0.67005		GO:0009535	chloroplast thylakoid membrane	572	31	39.78	0.88631		GO:0061630	ubiquitin protein ligase activity	664	75	48.04	1.6e-05		GO:0006793	phosphorus metabolic process	4297	293	295.07	0.66367		GO:0031225
GO:0071310	cellular response to organic substance	2405	116	57.78	0.19957		GO:0005615	extracellular space	221	9	5.54	0.11449		GO:0022890	inorganic cation transmembrane transporter activity	1153	26	27.56	0.00215		GO:0022414	reproductive process	3999	290	277.63	0.11797		GO:0044431	Golgi apparatus part	929	30	64.61	0.52689		GO:0005509	calcium ion binding	1104	74	79.87	0.16844		GO:0006796	phosphate-containing compound metabolic process	4240	293	291.16	0.75271		GO:0005730
GO:0048583	regulation of response to stimulus	2237	115	53.74	0.75078		GO:0005802	trans-Golgi network	425	9	10.66	0.48768		GO:0042623	ATPase activity, coupled	1352	26	32.32	0.38166		GO:0055114	oxidation-reduction process	2952	285	204.94	8.9e-08		GO:0000151	ubiquitin ligase complex	563	29	39.15	0.62637		GO:0000975	regulatory region DNA binding	900	72	65.11	0.03018		GO:0048519	negative regulation of biological process	3631	276	249.34	0.61972		GO:0031966
GO:0010243	response to organonitrogen compound	646	114	15.52	0.9293		GO:0031988	membrane-bounded vesicle	495	9	12.41	0.81489		GO:0043492	ATPase activity, coupled to movement of substances	769	26	18.38	0.0561		GO:1901575	organic substance catabolic process	3966	275	275.34	0.85433		GO:0005938	cell cortex	295	28	20.52	0.1277		GO:0001067	regulatory region nucleic acid binding	900	72	65.11	0.03018		GO:0044248	cellular catabolic process	3595	273	246.87	0.44995		GO:0000785
GO:0044711	single-organism biosynthetic process	4852	108	116.56	0.12419		GO:0000935	barrier septum	12	8	0.3	4.5e-05		GO:0030234	enzyme regulator activity	1397	25	33.4	0.5375		GO:0044248	cellular catabolic process	3595	270	249.58	0.93878		GO:0019866	organelle inner membrane	731	28	50.84	0.70177		GO:0044212	transcription regulatory region DNA binding	900	72	65.11	0.03018		GO:0009791	post-embryonic development	3425	270	235.19	0.0601		GO:0000151
GO:0009737	response to abscisic acid	1333	107	32.02	9.7e-05		GO:0005811	lipid particle	152	8	3.81	0.67254		GO:0015399	primary active transmembrane transporter activity	784	24	18.74	0.21176		GO:0010035	response to inorganic substance	2273	269	157.8	0.23646		GO:0031461	cullin-RING ubiquitin ligase complex	441	27	30.67	0.63795		GO:0004519	endonuclease activity	3094	70	223.84	0.99981		GO:0010035	response to inorganic substance	2273	266	156.09	0.00548		GO:0019866
GO:0010200	response to chitin	365	106	8.77	8e-24		GO:0005856	cytoskeleton	1037	8	26	0.69539		GO:0015405	P-P-bond-hydrolysis-driven transmembrane transporter activity	784	24	18.74	0.21176		GO:0071310	cellular response to organic substance	2405	262	166.97	0.19931		GO:0043656	intracellular region of host	335	26	23.3	0.28651		GO:0015103	inorganic anion transmembrane transporter activity	850	70	61.49	0.06431		GO:0006996	organelle organization	4344	255	298.3	0.99571		GO:0031461
GO:0005975	carbohydrate metabolic process	3464	104	83.22	0.27693		GO:0030428	cell septum	12	8	0.3	1		GO:0003723	RNA binding	5766	22	137.84	0.02412		GO:0048513	organ development	2953	256	205.01	0.40912		GO:0042025	host cell nucleus	335	26	23.3	0.28651		GO:0042802	identical protein binding	960	68	69.45	0.14482		GO:0003006	developmental process involved in reproduction	3149	247	216.24	0.05902		GO:0000786
GO:0071840	cellular component organization or biogenesis	8046	101	193.29	0.75541		GO:0044451	nucleoplasm part	1020	8	25.58	0.91952		GO:0005342	organic acid transmembrane transporter activity	210	22	5.02	0.55602		GO:0009791	post-embryonic development	3425	252	237.78	0.0563		GO:0033646	host intracellular part	335	26	23.3	0.28651		GO:0042578	phosphoric ester hydrolase activity	1055	65	76.32	0.59368		GO:0009314	response to radiation	1663	245	114.2	0.01218		GO:0044815
GO:0009056	catabolic process	4542	100	109.11	0.71655		GO:0051286	cell tip	57	8	1.43	0.04471		GO:0008514	organic anion transmembrane transporter activity	354	22	8.46	0.24371		GO:0048583	regulation of response to stimulus	2237	248	155.3	0.22308		GO:0033647	host intracellular organelle	335	26	23.3	0.28651		GO:0015399	primary active transmembrane transporter activity	784	64	56.72	0.04947		GO:0048518	positive regulation of biological process	3296	243	226.34	0.58898		GO:0046658
GO:0071495	cellular response to endogenous stimulus	1931	99	46.39	0.04483		GO:0060187	cell pole	57	8	1.43	0.04471		GO:0015297	antiporter activity	566	22	13.53	0.04366		GO:0009607	response to biotic stimulus	2231	246	154.89	0.12938		GO:0033648	host intracellular membrane-bounded organelle	335	26	23.3	0.28651		GO:0015405	P-P-bond-hydrolysis-driven transmembrane transporter activity	784	64	56.72	0.04947		GO:0000003	reproduction	3081	241	211.57	0.01937		GO:0000228
GO:0048513	organ development	2953	98	70.94	0.31873		GO:0005768	endosome	760	7	19.06	0.41622		GO:0016820	hydrolase activity, acting on acid anhydrides, catalyzing transmembrane movement of substances	732	22	17.5	0.08227		GO:0033554	cellular response to stress	2953	245	205.01	0.52093		GO:0043657	host cell	356	26	24.76	0.37239		GO:0043492	ATPase activity, coupled to movement of substances	769	64	55.63	0.01122		GO:0048583	regulation of response to stimulus	2237	237	153.61	0.38214		GO:1990104
GO:0009617	response to bacterium	1024	97	24.6	0.00145		GO:0009534	chloroplast thylakoid	707	7	17.73	0.87251		GO:0042626	ATPase activity, coupled to transmembrane movement of substances	732	22	17.5	0.08227		GO:0003006	developmental process involved in reproduction	3149	242	218.62	0.07344		GO:0043245	extraorganismal space	356	26	24.76	0.37239		GO:0004872	receptor activity	609	62	44.06	0.07752		GO:0048513	organ development	2953	236	202.78	0.22685		GO:0043656
GO:0048518	positive regulation of biological process	3296	97	79.18	0.41473		GO:0009579	thylakoid	992	7	24.88	0.82402		GO:0046943	carboxylic acid transmembrane transporter activity	210	22	5.02	0.55602		GO:0048518	positive regulation of biological process	3296	240	228.83	0.39854		GO:0044215	other organism	356	26	24.76	0.37239		GO:0008324	cation transmembrane transporter activity	1239	62	89.64	0.03007		GO:0033554	cellular response to stress	2953	234	202.78	0.73661		GO:0042025
GO:0016043	cellular component organization	7348	97	176.52	0.81031		GO:0031976	plastid thylakoid	707	7	17.73	0.87251		GO:0015267	channel activity	578	21	13.82	0.01834		GO:0043436	oxoacid metabolic process	3156	232	219.11	0.29724		GO:0044216	other organism cell	356	26	24.76	0.37239		GO:0038023	signaling receptor activity	609	62	44.06	0.07752		GO:0009416	response to light stimulus	1570	232	107.81	0.03144		GO:0033646
GO:0032870	cellular response to hormone stimulus	1883	96	45.24	0.03645		GO:0044430	cytoskeletal part	880	7	22.07	0.42598		GO:0022803	passive transmembrane transporter activity	578	21	13.82	0.01834		GO:0043207	response to external biotic stimulus	2152	232	149.4	0.00767		GO:0044217	other organism part	356	26	24.76	0.37239		GO:0001871	pattern binding	546	61	39.5	1		GO:0006952	defense response	2739	229	188.09	0.02035		GO:0033647
GO:0022414	reproductive process	3999	96	96.07	0.49327		GO:0044432	endoplasmic reticulum part	950	7	23.82	0.4171		GO:0050660	flavin adenine dinucleotide binding	536	21	12.81	0.00029		GO:0006082	organic acid metabolic process	3160	232	219.38	0.31139		GO:0018995	host	356	26	24.76	0.37239		GO:0030247	polysaccharide binding	546	61	39.5	0.00017		GO:0097305	response to alcohol	1629	226	111.86	0.05961		GO:0033648
GO:0048519	negative regulation of biological process	3631	96	87.23	0.68945		GO:0009526	plastid envelope	1074	6	26.93	0.72868		GO:0004601	peroxidase activity	424	20	10.14	0.00012		GO:0051707	response to other organism	2141	228	148.64	0.00597		GO:0033643	host cell part	356	26	24.76	0.37239		GO:0005507	copper ion binding	483	60	34.94	0.04707		GO:0043436	oxoacid metabolic process	3156	226	216.72	0.13757		GO:0043657
GO:0044281	small molecule metabolic process	4958	94	119.11	0.3712		GO:0009941	chloroplast envelope	1037	6	26	0.75661		GO:0016209	antioxidant activity	572	20	13.67	0.42993		GO:0097305	response to alcohol	1629	225	113.09	0.36505		GO:0005743	mitochondrial inner membrane	617	26	42.91	0.47547		GO:0016779	nucleotidyltransferase activity	762	60	55.13	0.96858		GO:0006082	organic acid metabolic process	3160	226	217	0.14222		GO:0043245
GO:0033554	cellular response to stress	2953	94	70.94	0.99564		GO:0000325	plant-type vacuole	267	5	6.7	0.06806		GO:0016684	oxidoreductase activity, acting on peroxide as acceptor	431	20	10.3	0.105		GO:0071495	cellular response to endogenous stimulus	1931	218	134.06	0.14917		GO:0005874	microtubule	368	25	25.59	0.04148		GO:0016820	hydrolase activity, acting on acid anhydrides, catalyzing transmembrane movement of substances	732	59	52.96	0.01751		GO:0044702	single organism reproductive process	2883	224	197.97	0.02583		GO:0044215
GO:0009755	hormone-mediated signaling pathway	1686	91	40.5	0.10875		GO:0005774	vacuolar membrane	884	5	22.17	0.05064		GO:0022838	substrate-specific channel activity	483	20	11.55	0.03611		GO:0044702	single organism reproductive process	2883	218	200.15	0.04319		GO:0005840	ribosome	1369	24	95.21	0.62584		GO:0042626	ATPase activity, coupled to transmembrane movement of substances	732	59	52.96	0.01751		GO:0033993	response to lipid	1748	217	120.03	0.01895		GO:0044216
GO:1901701	cellular response to oxygen-containing compound	1786	90	42.91	0.18393		GO:0016023	cytoplasmic membrane-bounded vesicle	465	5	11.66	0.74494		GO:0004872	receptor activity	609	19	14.56	0.0632		GO:0000003	reproduction	3081	218	213.9	0.08203		GO:0031988	membrane-bounded vesicle	495	23	34.43	0.9544		GO:0022890	inorganic cation transmembrane transporter activity	1153	55	83.41	0.02316		GO:0048523	negative regulation of cellular process	2598	217	178.4	0.16103		GO:0044217
GO:0006796	phosphate-containing compound metabolic process	4240	90	101.86	0.66593		GO:0016604	nuclear body	296	5	7.42	0.40987		GO:0009055	electron carrier activity	495	19	11.83	0.36582		GO:0006996	organelle organization	4344	217	301.58	0.96849		GO:0016023	cytoplasmic membrane-bounded vesicle	465	22	32.34	0.90567		GO:0016209	antioxidant activity	572	54	41.38	0.42176		GO:0009607	response to biotic stimulus	2231	216	153.2	0.02398		GO:0018995
GO:0006793	phosphorus metabolic process	4297	90	103.23	0.67926		GO:0019898	extrinsic component of membrane	253	5	6.34	0.18075		GO:0038023	signaling receptor activity	609	19	14.56	0.0632		GO:0032870	cellular response to hormone stimulus	1883	215	130.73	0.15917		GO:0044448	cell cortex part	222	21	15.44	0.27344		GO:0009055	electron carrier activity	495	53	35.81	0.12576		GO:0071310	cellular response to organic substance	2405	216	165.15	0.1348		GO:0033643
GO:0044248	cellular catabolic process	3595	90	86.36	0.93658		GO:0031300	intrinsic component of organelle membrane	313	5	7.85	0.64539		GO:0046983	protein dimerization activity	2234	19	53.4	0.99999		GO:0048523	negative regulation of cellular process	2598	213	180.37	0.34259		GO:0005887	integral component of plasma membrane	379	20	26.36	0.14416		GO:0015291	secondary active transmembrane transporter activity	772	53	55.85	0.01514		GO:0065008	regulation of biological quality	2905	213	199.49	0.98693		GO:0044451
GO:0009791	post-embryonic development	3425	88	82.28	0.42276		GO:0031301	integral component of organelle membrane	312	5	7.82	0.63863		GO:0004857	enzyme inhibitor activity	839	18	20.06	0.64877		GO:0033993	response to lipid	1748	211	121.36	0.13404		GO:0005768	endosome	760	20	52.86	0.62238		GO:0046527	glucosyltransferase activity	315	53	22.79	0.06419		GO:0043207	response to external biotic stimulus	2152	207	147.78	0.01116		GO:0005938
GO:0055114	oxidation-reduction process	2952	86	70.92	9.1e-05		GO:0042170	plastid membrane	326	5	8.17	0.2601		GO:0008233	peptidase activity	2073	18	49.56	0.76581		GO:0065008	regulation of biological quality	2905	207	201.68	0.98047		GO:0005871	kinesin complex	140	19	9.74	0.40906		GO:0015114	phosphate ion transmembrane transporter activity	733	52	53.03	0.07495		GO:0051707	response to other organism	2141	203	147.02	0.0177		GO:0005743
GO:1901575	organic substance catabolic process	3966	83	95.28	0.88499		GO:0044437	vacuolar part	900	5	22.57	0.07452		GO:0008168	methyltransferase activity	1273	17	30.43	0.16479		GO:0009755	hormone-mediated signaling pathway	1686	207	117.05	0.07657		GO:0016604	nuclear body	296	19	20.59	0.53043		GO:0016765	transferase activity, transferring alkyl or aryl (other than methyl) groups	399	52	28.87	0.54271		GO:0048869	cellular developmental process	2217	200	152.24	0.3758		GO:0044454
GO:0009620	response to fungus	829	82	19.92	0.00031		GO:0000139	Golgi membrane	485	4	12.16	0.08792		GO:0016741	transferase activity, transferring one-carbon groups	1315	17	31.44	0.22961		GO:0009314	response to radiation	1663	200	115.45	0.49721		GO:0005819	spindle	173	18	12.03	0.00965		GO:0008017	microtubule binding	434	50	31.4	0.04252		GO:0009057	macromolecule catabolic process	2700	199	185.41	0.36779		GO:0005768
GO:0003006	developmental process involved in reproduction	3149	82	75.65	0.55112		GO:0005694	chromosome	1251	4	31.37	0.97052		GO:0070011	peptidase activity, acting on L-amino acid peptides	1944	17	46.47	0.6783		GO:0006629	lipid metabolic process	2758	198	191.47	0.22476		GO:0019005	SCF ubiquitin ligase complex	187	18	13.01	0.17688		GO:0015318	inorganic solute uptake transmembrane transporter activity	730	50	52.81	0.0847		GO:0050793	regulation of developmental process	1961	197	134.66	0.12699		GO:0031988
GO:0042742	defense response to bacterium	863	81	20.73	0.04168		GO:0005788	endoplasmic reticulum lumen	65	4	1.63	0.32148		GO:0004721	phosphoprotein phosphatase activity	439	16	10.49	0.10355		GO:0019752	carboxylic acid metabolic process	2785	197	193.35	0.25775		GO:0000785	chromatin	632	18	43.95	0.89366		GO:0015563	uptake transmembrane transporter activity	730	50	52.81	0.0847		GO:0016310	phosphorylation	2380	197	163.43	0.24051		GO:0016023
GO:0006970	response to osmotic stress	1290	79	30.99	0.02258		GO:0015630	microtubule cytoskeleton	723	4	18.13	0.10147		GO:0005216	ion channel activity	437	16	10.45	0.03645		GO:0016310	phosphorylation	2380	195	165.23	0.24519		GO:0044433	cytoplasmic vesicle part	413	18	28.72	0.97022		GO:0015631	tubulin binding	479	50	34.65	0.07927		GO:0048522	positive regulation of cellular process	2676	193	183.76	0.24439		GO:0009524
GO:0009636	response to toxic substance	846	78	20.32	0.18021		GO:0019897	extrinsic component of plasma membrane	102	4	2.56	0.00741		GO:0042802	identical protein binding	960	16	22.95	0.1038		GO:0009416	response to light stimulus	1570	193	109	0.00829		GO:0000228	nuclear chromosome	477	18	33.17	0.98595		GO:0071949	FAD binding	218	50	15.77	2.2e-12		GO:0009636	response to toxic substance	846	189	58.09	7.2e-07		GO:0005819
GO:0048523	negative regulation of cellular process	2598	77	62.41	0.24412		GO:0030529	ribonucleoprotein complex	2371	4	59.46	0.38808		GO:0071949	FAD binding	218	16	5.21	8.4e-13		GO:0042493	response to drug	1181	192	81.99	3.3e-10		GO:0000325	plant-type vacuole	267	17	18.57	0.06189		GO:0016791	phosphatase activity	847	49	61.28	0.29831		GO:0019752	carboxylic acid metabolic process	2785	188	191.25	0.30595		GO:0042170
GO:0043436	oxoacid metabolic process	3156	77	75.82	0.31476		GO:0031304	intrinsic component of mitochondrial inner membrane	40	4	1	0.56943		GO:0005057	receptor signaling protein activity	128	15	3.06	0.14805		GO:0009892	negative regulation of metabolic process	2132	191	148.01	0.77155		GO:0098590	plasma membrane region	193	17	13.42	0.18967		GO:0016407	acetyltransferase activity	356	48	25.75	0.01802		GO:0006970	response to osmotic stress	1290	187	88.58	0.00852		GO:0005887
GO:0002376	immune system process	1205	77	28.95	0.31775		GO:0031305	integral component of mitochondrial inner membrane	40	4	1	0.56943		GO:0015238	drug transmembrane transporter activity	136	15	3.25	0.1064		GO:0009737	response to abscisic acid	1333	188	92.54	2.6e-06		GO:0005811	lipid particle	152	17	10.57	0.44012		GO:0008144	drug binding	433	47	31.33	0.03055		GO:0032870	cellular response to hormone stimulus	1883	185	129.31	0.10786		GO:0044448
GO:0006082	organic acid metabolic process	3160	77	75.91	0.32202		GO:0032592	integral component of mitochondrial membrane	70	4	1.76	0.85732		GO:0043531	ADP binding	1491	15	35.64	0.0075		GO:1901701	cellular response to oxygen-containing compound	1786	187	123.99	0.02815		GO:0000148	1,3-beta-D-glucan synthase complex	53	16	3.69	3.6e-06		GO:0016614	oxidoreductase activity, acting on CH-OH group of donors	610	47	44.13	0.00715		GO:0071495	cellular response to endogenous stimulus	1931	185	132.6	0.11008		GO:1990204
GO:0006955	immune response	1047	77	25.15	0.36667		GO:0043230	extracellular organelle	23	4	0.58	0.2872		GO:0046873	metal ion transmembrane transporter activity	667	15	15.94	0.01455		GO:0061458	reproductive system development	2691	187	186.82	0.06162		GO:0005788	endoplasmic reticulum lumen	65	16	4.52	0.00274		GO:0016853	isomerase activity	1002	46	72.49	0.72617		GO:0009653	anatomical structure morphogenesis	2207	179	151.55	0.40899		GO:0042995
GO:0048367	shoot system development	1801	77	43.27	0.60844		GO:0044455	mitochondrial membrane part	364	4	9.13	0.35555		GO:0090484	drug transporter activity	136	15	3.25	0.1064		GO:0048608	reproductive structure development	2691	187	186.82	0.06162		GO:0042170	plastid membrane	326	16	22.67	0.26977		GO:0035251	UDP-glucosyltransferase activity	289	46	20.91	0.22994		GO:0042493	response to drug	1181	178	81.1	5.1e-08		GO:0000139
GO:0006629	lipid metabolic process	2758	76	66.26	0.14684		GO:0065010	extracellular membrane-bounded organelle	23	4	0.58	0.2872		GO:0004175	endopeptidase activity	1075	14	25.7	0.3474		GO:0048522	positive regulation of cellular process	2676	187	185.78	0.44621		GO:0005777	peroxisome	405	16	28.17	0.40937		GO:0004601	peroxidase activity	424	45	30.67	0.00014		GO:0006259	DNA metabolic process	2393	178	164.33	0.99996		GO:0005635
GO:0006811	ion transport	1964	75	47.18	0.00135		GO:0070062	extracellular vesicular exosome	23	4	0.58	0.2872		GO:0004888	transmembrane signaling receptor activity	422	14	10.09	0.0504		GO:0010605	negative regulation of macromolecule metabolic process	1957	182	135.87	0.33657		GO:0042579	microbody	405	16	28.17	0.40937		GO:0016684	oxidoreductase activity, acting on peroxide as acceptor	431	45	31.18	0.13007		GO:0009755	hormone-mediated signaling pathway	1686	177	115.78	0.02186		GO:0000325
GO:0045087	innate immune response	963	75	23.13	0.12364		GO:0098573	intrinsic component of mitochondrial membrane	70	4	1.76	0.85732		GO:0005310	dicarboxylic acid transmembrane transporter activity	57	14	1.36	0.82206		GO:0006468	protein phosphorylation	2008	182	139.41	0.00179		GO:0044454	nuclear chromosome part	424	16	29.49	0.9701		GO:0008236	serine-type peptidase activity	615	44	44.49	0.00777		GO:0061458	reproductive system development	2691	177	184.79	0.07955		GO:0031969
GO:0048522	positive regulation of cellular process	2676	75	64.29	0.33526		GO:0098589	membrane region	1097	4	27.51	0.17855		GO:0005507	copper ion binding	483	14	11.55	0.13433		GO:0009057	macromolecule catabolic process	2700	179	187.45	0.86415		GO:0005802	trans-Golgi network	425	15	29.56	0.52931		GO:0017171	serine hydrolase activity	615	44	44.49	1		GO:0048608	reproductive structure development	2691	177	184.79	0.07955		GO:0016604
GO:0071229	cellular response to acid chemical	1184	74	28.44	0.05054		GO:0000228	nuclear chromosome	477	3	11.96	0.99631		GO:0008289	lipid binding	665	14	15.9	0.2671		GO:0098542	defense response to other organism	1666	175	115.66	0.01734		GO:0005681	spliceosomal complex	333	15	23.16	0.56089		GO:0004386	helicase activity	682	43	49.34	0.61464		GO:0009737	response to abscisic acid	1333	176	91.54	4.9e-05		GO:0044463
GO:0070647	protein modification by small protein conjugation or removal	1843	74	44.27	0.0561		GO:0000322	storage vacuole	63	3	1.58	0.90879		GO:0015077	monovalent inorganic cation transmembrane transporter activity	671	14	16.04	0.09152		GO:0050793	regulation of developmental process	1961	175	136.14	0.16909		GO:0015629	actin cytoskeleton	209	15	14.54	0.63776		GO:0031406	carboxylic acid binding	252	43	18.23	0.70592		GO:0009266	response to temperature stimulus	1319	176	90.58	0.0559		GO:0005840
GO:0009266	response to temperature stimulus	1319	74	31.69	0.07439		GO:0000326	protein storage vacuole	48	3	1.2	0.77757		GO:0015116	sulfate transmembrane transporter activity	64	14	1.53	0.00581		GO:0006970	response to osmotic stress	1290	167	89.56	0.03205		GO:0042995	cell projection	342	15	23.78	0.76415		GO:0043177	organic acid binding	252	43	18.23	0.70592		GO:0071554	cell wall organization or biogenesis	1412	174	96.96	0.08454		GO:0019898
GO:0032446	protein modification by small protein conjugation	1635	73	39.28	0.16632		GO:0005789	endoplasmic reticulum membrane	877	3	21.99	0.29239		GO:0015117	thiosulfate transmembrane transporter activity	19	14	0.45	3e-09		GO:0048869	cellular developmental process	2217	166	153.92	0.65245		GO:0031301	integral component of organelle membrane	312	15	21.7	0.84163		GO:0051082	unfolded protein binding	267	43	19.32	0.01049		GO:0006979	response to oxidative stress	1275	173	87.55	0.00095		GO:0005777
GO:0016567	protein ubiquitination	1562	72	37.52	0.00716		GO:0005840	ribosome	1369	3	34.33	0.598		GO:0015131	oxaloacetate transmembrane transporter activity	19	14	0.45	3e-09		GO:0009653	anatomical structure morphogenesis	2207	166	153.22	0.37661		GO:0031300	intrinsic component of organelle membrane	313	15	21.77	0.84224		GO:0004540	ribonuclease activity	1549	42	112.06	0.99991		GO:0006629	lipid metabolic process	2758	173	189.39	0.2304		GO:0042579
GO:0065008	regulation of biological quality	2905	72	69.79	0.86769		GO:0009897	external side of plasma membrane	34	3	0.85	0.34065		GO:0015140	malate transmembrane transporter activity	48	14	1.15	0.00025		GO:0009636	response to toxic substance	846	164	58.73	2.6e-09		GO:0000139	Golgi membrane	485	14	33.73	0.13872		GO:0008289	lipid binding	665	42	48.11	0.40179		GO:0044085	cellular component biogenesis	3012	173	206.83	0.23418		GO:0005802
GO:0044702	single organism reproductive process	2883	71	69.26	0.10826		GO:0009986	cell surface	75	3	1.88	0.89946		GO:0015141	succinate transmembrane transporter activity	22	14	0.53	5e-08		GO:1901698	response to nitrogen compound	1138	163	79.01	0.71644		GO:0019867	outer membrane	280	14	19.47	0.86903		GO:0042803	protein homodimerization activity	566	42	40.95	0.58614		GO:1901701	cellular response to oxygen-containing compound	1786	171	122.64	0.02294		GO:0009521
GO:0009416	response to light stimulus	1570	71	37.72	0.12611		GO:0031012	extracellular matrix	54	3	1.35	0.0534		GO:0015276	ligand-gated ion channel activity	153	14	3.66	0.02187		GO:0009266	response to temperature stimulus	1319	163	91.57	0.08643		GO:0019898	extrinsic component of membrane	253	13	17.6	0.01953		GO:0016616	oxidoreductase activity, acting on the CH-OH group of donors, NAD or NADP as acceptor	511	41	36.97	0.06156		GO:0006468	protein phosphorylation	2008	169	137.89	0.0032		GO:0005811
GO:0009314	response to radiation	1663	71	39.95	0.19612		GO:0042175	nuclear outer membrane-endoplasmic reticulum membrane network	883	3	22.14	0.31924		GO:0015556	C4-dicarboxylate transmembrane transporter activity	52	14	1.24	0.22222		GO:0048367	shoot system development	1801	157	125.03	0.74768		GO:0044463	cell projection part	134	13	9.32	0.70451		GO:0008374	O-acyltransferase activity	339	40	24.52	0.14766		GO:1901565	organonitrogen compound catabolic process	1693	164	116.26	0.08408		GO:0019867
GO:0050793	regulation of developmental process	1961	71	47.11	0.47399		GO:0044427	chromosomal part	1047	3	26.25	0.95676		GO:0022834	ligand-gated channel activity	153	14	3.66	0.02187		GO:0044723	single-organism carbohydrate metabolic process	1867	156	129.62	0.39392		GO:0051286	cell tip	57	12	3.96	0.02019		GO:0016835	carbon-oxygen lyase activity	612	40	44.28	0.56499		GO:0044712	single-organism catabolic process	1772	161	121.68	0.39482		GO:0031977
GO:0046677	response to antibiotic	575	69	13.81	9.2e-06		GO:0044433	cytoplasmic vesicle part	413	3	10.36	0.92661		GO:0022836	gated channel activity	331	14	7.91	0.01399		GO:0044712	single-organism catabolic process	1772	153	123.02	0.66861		GO:0060187	cell pole	57	12	3.96	0.02019		GO:0003774	motor activity	341	39	24.67	0.16055		GO:0055085	transmembrane transport	2297	160	157.73	0.17497		GO:0098590
GO:0080134	regulation of response to stress	1112	69	26.71	0.55593		GO:0044454	nuclear chromosome part	424	3	10.63	0.98767		GO:1901682	sulfur compound transmembrane transporter activity	74	14	1.77	0.70944		GO:0071702	organic substance transport	2974	151	206.47	0.75954		GO:0005635	nuclear envelope	218	12	15.16	0.05128		GO:0003729	mRNA binding	638	38	46.16	0.24238		GO:0051239	regulation of multicellular organismal process	1857	160	127.52	0.31421		GO:0009523
GO:0061458	reproductive system development	2691	68	64.65	0.48985		GO:0098552	side of membrane	83	3	2.08	0.21498		GO:0008081	phosphoric diester hydrolase activity	188	13	4.49	0.3578		GO:0071229	cellular response to acid chemical	1184	151	82.2	0.02034		GO:0032993	protein-DNA complex	491	12	34.15	0.30896		GO:0004364	glutathione transferase activity	93	38	6.73	5.6e-10		GO:0009651	response to salt stress	1100	157	75.54	1.1e-05		GO:0080008
GO:0048608	reproductive structure development	2691	68	64.65	0.48985		GO:0000148	1,3-beta-D-glucan synthase complex	53	2	1.33	0.01024		GO:0016407	acetyltransferase activity	356	13	8.51	0.10069		GO:0044283	small molecule biosynthetic process	2003	151	139.06	0.0191		GO:0044462	external encapsulating structure part	79	11	5.49	0.1154		GO:0044822	poly(A) RNA binding	638	38	46.16	0.24238		GO:0098542	defense response to other organism	1666	154	114.4	0.0761		GO:0051286
GO:0009057	macromolecule catabolic process	2700	68	64.86	0.95263		GO:0005635	nuclear envelope	218	2	5.47	0.05321		GO:0016779	nucleotidyltransferase activity	762	13	18.22	0.99921		GO:1901565	organonitrogen compound catabolic process	1693	150	117.54	0.26202		GO:0009521	photosystem	191	11	13.28	0.31228		GO:0000988	protein binding transcription factor activity	386	37	27.93	0.10267		GO:0007049	cell cycle	1708	152	117.29	0.38732		GO:0060187
GO:0006979	response to oxidative stress	1275	67	30.63	0.00917		GO:0005643	nuclear pore	98	2	2.46	0.50741		GO:0051213	dioxygenase activity	316	13	7.55	0.24695		GO:0051239	regulation of multicellular organismal process	1857	150	128.92	0.30821		GO:0031969	chloroplast membrane	301	11	20.93	0.47522		GO:0004521	endoribonuclease activity	1403	36	101.5	0.99992		GO:0006811	ion transport	1964	145	134.87	0.02719		GO:0044433
GO:0055085	transmembrane transport	2297	66	55.18	0.0148		GO:0005769	early endosome	165	2	4.14	0.85464		GO:0008061	chitin binding	73	12	1.75	0.0543		GO:0006979	response to oxidative stress	1275	148	88.52	0.0263		GO:0030880	RNA polymerase complex	349	11	24.27	0.9488		GO:0015267	channel activity	578	36	41.82	0.07351		GO:0044723	single-organism carbohydrate metabolic process	1867	145	128.21	0.2676		GO:0042555
GO:0009611	response to wounding	544	65	13.07	2.1e-06		GO:0005777	peroxisome	405	2	10.16	0.4513		GO:0008092	cytoskeletal protein binding	891	12	21.3	0.42451		GO:0006811	ion transport	1964	147	136.35	0.00483		GO:0000428	DNA-directed RNA polymerase complex	340	11	23.65	0.95346		GO:0022803	passive transmembrane transporter activity	578	36	41.82	0.07351		GO:1902589	single-organism organelle organization	2308	145	158.49	0.99923		GO:0070469
GO:0000003	reproduction	3081	65	74.02	0.02559		GO:0005826	actomyosin contractile ring	24	2	0.6	0.53812		GO:0008374	O-acyltransferase activity	339	12	8.1	0.34009		GO:0051641	cellular localization	2990	145	207.58	0.40971		GO:1990204	oxidoreductase complex	256	10	17.8	0.0552		GO:0008047	enzyme activator activity	300	34	21.7	0.66051		GO:0030154	cell differentiation	1714	144	117.7	0.76843		GO:0035770
GO:1901565	organonitrogen compound catabolic process	1693	65	40.67	0.14388		GO:0005874	microtubule	368	2	9.23	0.19883		GO:0016835	carbon-oxygen lyase activity	612	12	14.63	0.50758		GO:0010629	negative regulation of gene expression	1497	143	103.93	0.57187		GO:0000145	exocyst	129	10	8.97	0.06215		GO:0030170	pyridoxal phosphate binding	310	34	22.43	0.18372		GO:2000026	regulation of multicellular organismal development	1535	142	105.41	0.36081		GO:0036464
GO:0016310	phosphorylation	2380	65	57.18	0.26093		GO:0009535	chloroplast thylakoid membrane	572	2	14.34	0.86209		GO:0052689	carboxylic ester hydrolase activity	505	12	12.07	0.52752		GO:0002376	immune system process	1205	142	83.66	0.09718		GO:0016324	apical plasma membrane	109	10	7.58	0.07934		GO:0015077	monovalent inorganic cation transmembrane transporter activity	671	32	48.54	0.19306		GO:0048367	shoot system development	1801	142	123.67	0.6254		GO:0000793
GO:0006468	protein phosphorylation	2008	64	48.24	0.00206		GO:0009705	plant-type vacuole membrane	161	2	4.04	0.37249		GO:0004568	chitinase activity	66	11	1.58	0.05178		GO:0055085	transmembrane transport	2297	141	159.47	0.04837		GO:0009295	nucleoid	88	10	6.12	0.132		GO:0000989	transcription factor binding transcription factor activity	345	31	24.96	0.15492		GO:0051641	cellular localization	2990	141	205.32	0.34827		GO:0030135
GO:0014070	response to organic cyclic compound	961	64	23.09	0.06212		GO:0009930	longitudinal side of cell surface	10	2	0.25	0.18963		GO:0004702	receptor signaling protein serine/threonine kinase activity	84	11	2.01	0.44046		GO:0010646	regulation of cell communication	1270	141	88.17	0.34961		GO:0045177	apical part of cell	121	10	8.42	0.15143		GO:0003777	microtubule motor activity	269	31	19.46	0.17778		GO:0005976	polysaccharide metabolic process	1033	140	70.94	0.05304		GO:0019005
GO:0048827	phyllome development	1096	64	26.33	0.80558		GO:0012506	vesicle membrane	271	2	6.8	0.96093		GO:0016701	oxidoreductase activity, acting on single donors with incorporation of molecular oxygen	213	11	5.09	0.95101		GO:0009651	response to salt stress	1100	141	76.37	0.00012		GO:0009523	photosystem II	141	10	9.81	0.33297		GO:0004190	aspartic-type endopeptidase activity	279	31	20.18	0.18216		GO:0010646	regulation of cell communication	1270	140	87.21	0.23762		GO:0015629
GO:0006508	proteolysis	2551	62	61.28	0.0239		GO:0015629	actin cytoskeleton	209	2	5.24	0.82843		GO:0016702	oxidoreductase activity, acting on single donors with incorporation of molecular oxygen, incorporation of two atoms of oxygen	159	11	3.8	5.3e-06		GO:0044085	cellular component biogenesis	3012	140	209.11	0.31968		GO:0044455	mitochondrial membrane part	364	10	25.31	0.45496		GO:0005516	calmodulin binding	351	31	25.39	0.09011		GO:0023051	regulation of signaling	1241	139	85.22	0.18573		GO:0000932
GO:0009651	response to salt stress	1100	61	26.43	0.137		GO:0016592	mediator complex	172	2	4.31	0.6402		GO:0016709	oxidoreductase activity, acting on paired donors, with incorporation or reduction of molecular oxygen, NAD(P)H as one donor, and incorporation of one atom of oxygen	318	11	7.6	0.11662		GO:0023051	regulation of signaling	1241	140	86.16	0.31078		GO:0009524	phragmoplast	127	10	8.83	0.48451		GO:0015297	antiporter activity	566	31	40.95	0.16057		GO:0009888	tissue development	1619	138	111.18	0.46626		GO:0005657
GO:0051239	regulation of multicellular organismal process	1857	60	44.61	0.25651		GO:0030139	endocytic vesicle	49	2	1.23	0.66967		GO:0019899	enzyme binding	1117	11	26.7	0.72619		GO:0009888	tissue development	1619	140	112.4	0.6571		GO:0030863	cortical cytoskeleton	86	10	5.98	0.5775		GO:0016709	oxidoreductase activity, acting on paired donors, with incorporation or reduction of molecular oxygen, NAD(P)H as one donor, and incorporation of one atom of oxygen	318	31	23.01	0.07458		GO:0040007	growth	1313	137	90.16	0.07505		GO:0098687
GO:0010605	negative regulation of macromolecule metabolic process	1957	58	47.01	0.24212		GO:0030659	cytoplasmic vesicle membrane	264	2	6.62	0.96227		GO:0032403	protein complex binding	698	11	16.69	0.70037		GO:0035556	intracellular signal transduction	1265	139	87.82	0.35188		GO:0055029	nuclear DNA-directed RNA polymerase complex	312	10	21.7	0.9672		GO:0070001	aspartic-type peptidase activity	279	31	20.18	0.18216		GO:0009892	negative regulation of metabolic process	2132	136	146.4	0.78172		GO:0055028
GO:0023051	regulation of signaling	1241	58	29.81	0.42686		GO:0030666	endocytic vesicle membrane	15	2	0.38	0.03864		GO:0034062	RNA polymerase activity	306	11	7.32	0.57173		GO:0006259	DNA metabolic process	2393	137	166.13	0.99996		GO:0030141	secretory granule	42	9	2.92	0.01353		GO:0003712	transcription cofactor activity	306	30	22.14	0.04722		GO:0022402	cell cycle process	1356	135	93.12	0.18283		GO:0000347
GO:0010646	regulation of cell communication	1270	58	30.51	0.45309		GO:0030863	cortical cytoskeleton	86	2	2.16	0.91733		GO:0072509	divalent inorganic cation transmembrane transporter activity	347	11	8.3	0.02423		GO:0009966	regulation of signal transduction	1108	136	76.92	0.37084		GO:0016442	RISC complex	30	9	2.09	0.02747		GO:0004252	serine-type endopeptidase activity	352	30	25.47	0.29918		GO:0071702	organic substance transport	2974	135	204.22	0.77511		GO:0009295
GO:0009892	negative regulation of metabolic process	2132	58	51.22	0.74052		GO:0030864	cortical actin cytoskeleton	32	2	0.8	0.57634		GO:0004518	nuclease activity	3555	10	84.98	0.75401		GO:0006508	proteolysis	2551	135	177.1	0.13223		GO:0031332	RNAi effector complex	30	9	2.09	0.02747		GO:0016891	endoribonuclease activity, producing 5'-phosphomonoesters	1304	30	94.34	0.99992		GO:0044283	small molecule biosynthetic process	2003	134	137.55	0.04704		GO:0030981
GO:0050832	defense response to fungus	622	57	14.94	0.00079		GO:0030880	RNA polymerase complex	349	2	8.75	0.93792		GO:0008144	drug binding	433	10	10.35	0.08904		GO:0044262	cellular carbohydrate metabolic process	1124	131	78.03	0.26233		GO:0005881	cytoplasmic microtubule	62	9	4.31	0.10805		GO:0016893	endonuclease activity, active with either ribo- or deoxyribonucleic acids and producing 5'-phosphomonoesters	1318	30	95.35	0.99992		GO:0022607	cellular component assembly	2092	134	143.66	0.19751		GO:0005681
GO:0019752	carboxylic acid metabolic process	2785	57	66.9	0.28661		GO:0034357	photosynthetic membrane	719	2	18.03	0.80284		GO:0008375	acetylglucosaminyltransferase activity	115	10	2.75	0.00046		GO:0031324	negative regulation of cellular metabolic process	1519	131	105.46	0.10236		GO:0000793	condensed chromosome	168	9	11.68	0.27987		GO:0046873	metal ion transmembrane transporter activity	667	30	48.25	0.42968		GO:0006508	proteolysis	2551	134	175.18	0.2289		GO:0005881
GO:0071702	organic substance transport	2974	57	71.45	0.70791		GO:0042579	microbody	405	2	10.16	0.4513		GO:0015085	calcium ion transmembrane transporter activity	195	10	4.66	0.10041		GO:1901566	organonitrogen compound biosynthetic process	2351	130	163.22	0.38522		GO:0044452	nucleolar part	224	9	15.58	0.7893		GO:0051087	chaperone binding	119	30	8.61	0.00021		GO:0009966	regulation of signal transduction	1108	133	76.09	0.24134		GO:0030863
GO:0048366	leaf development	831	57	19.96	0.74028		GO:0042651	thylakoid membrane	673	2	16.88	0.8925		GO:0016298	lipase activity	169	10	4.04	0.13115		GO:2000026	regulation of multicellular organismal development	1535	129	106.57	0.27544		GO:0044440	endosomal part	172	9	11.96	0.92017		GO:0005525	GTP binding	1013	29	73.29	0.51754		GO:1901566	organonitrogen compound biosynthetic process	2351	131	161.44	0.34566		GO:0012506
GO:0048584	positive regulation of response to stimulus	812	56	19.51	0.0178		GO:0042995	cell projection	342	2	8.58	0.68048		GO:0016667	oxidoreductase activity, acting on a sulfur group of donors	371	10	8.87	0.65558		GO:0070647	protein modification by small protein conjugation or removal	1843	128	127.95	0.10563		GO:0012506	vesicle membrane	271	9	18.85	0.96396		GO:0016679	oxidoreductase activity, acting on diphenols and related substances as donors	203	29	14.69	0.05211		GO:0045229	external encapsulating structure organization	1083	130	74.37	0.56376		GO:0005876
GO:0009814	defense response, incompatible interaction	520	56	12.49	0.03496		GO:0043659	symbiosome	8	2	0.2	0.11551		GO:0016830	carbon-carbon lyase activity	276	10	6.6	0.67661		GO:0051649	establishment of localization in cell	2588	128	179.67	0.64484		GO:0030659	cytoplasmic vesicle membrane	264	9	18.36	0.96519		GO:0016682	oxidoreductase activity, acting on diphenols and related substances as donors, oxygen as acceptor	169	29	12.23	0.06962		GO:0071229	cellular response to acid chemical	1184	129	81.3	0.02205		GO:0044438
GO:0009414	response to water deprivation	939	56	22.56	0.05318		GO:0043660	bacteroid-containing symbiosome	8	2	0.2	0.11551		GO:0016831	carboxy-lyase activity	177	10	4.23	0.28472		GO:0030154	cell differentiation	1714	128	118.99	0.52843		GO:0042644	chloroplast nucleoid	57	8	3.96	0.04488		GO:0019001	guanyl nucleotide binding	1028	29	74.37	0.49079		GO:0071555	cell wall organization	1001	127	68.74	0.44776		GO:0044439
GO:0009415	response to water	974	56	23.4	0.06881		GO:0043661	peribacteroid membrane	8	2	0.2	0.11551		GO:0042803	protein homodimerization activity	566	10	13.53	0.49699		GO:0009415	response to water	974	125	67.62	0.12435		GO:0055028	cortical microtubule	42	8	2.92	0.10527		GO:0032561	guanyl ribonucleotide binding	1013	29	73.29	0.51754		GO:1901135	carbohydrate derivative metabolic process	2023	126	138.92	0.02316		GO:0009654
GO:0051641	cellular localization	2990	56	71.83	0.27445		GO:0044436	thylakoid part	785	2	19.68	0.91206		GO:0043566	structure-specific DNA binding	987	10	23.59	0.55477		GO:0009414	response to water deprivation	939	125	65.19	0.00455		GO:0042646	plastid nucleoid	69	8	4.8	0.13077		GO:0043566	structure-specific DNA binding	987	29	71.4	0.91749		GO:0010605	negative regulation of macromolecule metabolic process	1957	126	134.39	0.81847		GO:0042646
GO:2000026	regulation of multicellular organismal development	1535	56	36.88	0.29815		GO:0046930	pore complex	102	2	2.56	0.52463		GO:0000988	protein binding transcription factor activity	386	9	9.23	0.0882		GO:0008610	lipid biosynthetic process	1537	125	106.71	0.44073		GO:0030981	cortical microtubule cytoskeleton	47	8	3.27	0.15098		GO:0003690	double-stranded DNA binding	821	28	59.4	0.78521		GO:0044262	cellular carbohydrate metabolic process	1124	125	77.18	0.34692		GO:0044462
GO:0009966	regulation of signal transduction	1108	56	26.62	0.536		GO:0055035	plastid thylakoid membrane	579	2	14.52	0.85572		GO:0000989	transcription factor binding transcription factor activity	345	9	8.25	0.12569		GO:0006955	immune response	1047	125	72.69	0.20721		GO:0005615	extracellular space	221	8	15.37	0.21714		GO:0004721	phosphoprotein phosphatase activity	439	28	31.76	0.26066		GO:0035556	intracellular signal transduction	1265	125	86.87	0.41691		GO:0005798
GO:0071554	cell wall organization or biogenesis	1412	52	33.92	0.41682		GO:0070938	contractile ring	24	2	0.6	0.53812		GO:0003690	double-stranded DNA binding	821	9	19.63	0.43559		GO:0051172	negative regulation of nitrogen compound metabolic process	1395	123	96.85	0.00993		GO:0009705	plant-type vacuole membrane	161	8	11.2	0.29885		GO:0008757	S-adenosylmethionine-dependent methyltransferase activity	481	28	34.8	0.26977		GO:0043933	macromolecular complex subunit organization	1925	123	132.19	0.48141		GO:0010319
GO:0000302	response to reactive oxygen species	674	51	16.19	0.01922		GO:0000109	nucleotide-excision repair complex	32	1	0.8	0.70979		GO:0003712	transcription cofactor activity	306	9	7.32	0.04335		GO:0010243	response to organonitrogen compound	646	123	44.85	0.46144		GO:0032153	cell division site	49	8	3.41	0.32861		GO:0016667	oxidoreductase activity, acting on a sulfur group of donors	371	28	26.84	0.75921		GO:0009415	response to water	974	121	66.88	0.01759		GO:0044455
GO:0031347	regulation of defense response	713	50	17.13	0.00188		GO:0000323	lytic vacuole	155	1	3.89	0.45076		GO:0015035	protein disulfide oxidoreductase activity	228	9	5.45	0.49406		GO:1902589	single-organism organelle organization	2308	122	160.23	0.99413		GO:0032155	cell division site part	45	8	3.13	0.34441		GO:0033293	monocarboxylic acid binding	107	28	7.74	0.45763		GO:0051301	cell division	1385	121	95.11	0.40825		GO:0031300
GO:0044283	small molecule biosynthetic process	2003	50	48.12	0.05826		GO:0000407	pre-autophagosomal structure	37	1	0.93	0.02118		GO:0015036	disulfide oxidoreductase activity	270	9	6.45	0.73811		GO:0032446	protein modification by small protein conjugation	1635	121	113.51	0.14224		GO:0044445	cytosolic part	428	8	29.77	0.38528		GO:0034062	RNA polymerase activity	306	28	22.14	0.61206		GO:0044265	cellular macromolecule catabolic process	2166	121	148.74	0.52029		GO:0031301
GO:0031325	positive regulation of cellular metabolic process	1786	50	42.91	0.47585		GO:0000418	DNA-directed RNA polymerase IV complex	43	1	1.08	0.56958		GO:0016620	oxidoreductase activity, acting on the aldehyde or oxo group of donors, NAD or NADP as acceptor	263	9	6.29	0.70937		GO:0006520	cellular amino acid metabolic process	1406	120	97.61	0.14471		GO:0005798	Golgi-associated vesicle	170	8	11.82	0.46862		GO:0043178	alcohol binding	107	28	7.74	0.19032		GO:1901698	response to nitrogen compound	1138	121	78.15	0.90151		GO:0030659
GO:0009893	positive regulation of metabolic process	1951	50	46.87	0.57116		GO:0000419	DNA-directed RNA polymerase V complex	42	1	1.05	0.76461		GO:0016903	oxidoreductase activity, acting on the aldehyde or oxo group of donors	319	9	7.63	0.74671		GO:0080134	regulation of response to stress	1112	119	77.2	0.5969		GO:0031977	thylakoid lumen	137	8	9.53	0.48429		GO:0004888	transmembrane signaling receptor activity	422	27	30.53	0.1617		GO:0007017	microtubule-based process	763	119	52.39	0.00262		GO:0005901
GO:0044262	cellular carbohydrate metabolic process	1124	49	27	0.46307		GO:0000428	DNA-directed RNA polymerase complex	340	1	8.53	0.94316		GO:0030145	manganese ion binding	137	9	3.28	0.00056		GO:0016567	protein ubiquitination	1562	119	108.44	0.12121		GO:0000790	nuclear chromatin	221	8	15.37	0.54907		GO:0004864	protein phosphatase inhibitor activity	92	26	6.66	1.5e-05		GO:0009414	response to water deprivation	939	119	64.48	0.02797		GO:0042644
GO:0051172	negative regulation of nitrogen compound metabolic process	1395	48	33.51	0.00768		GO:0000781	chromosome, telomeric region	94	1	2.36	0.98855		GO:0051082	unfolded protein binding	267	9	6.38	0.89555		GO:0045087	innate immune response	963	118	66.86	0.06232		GO:0022626	cytosolic ribosome	350	8	24.34	0.63807		GO:0008514	organic anion transmembrane transporter activity	354	26	25.61	0.25166		GO:0019748	secondary metabolic process	826	119	56.72	0.06047		GO:0000145
GO:0031324	negative regulation of cellular metabolic process	1519	48	36.49	0.01223		GO:0000784	nuclear chromosome, telomeric region	74	1	1.86	0.99098		GO:0003968	RNA-directed RNA polymerase activity	45	8	1.08	0.05403		GO:0044265	cellular macromolecule catabolic process	2166	118	150.38	0.90692		GO:0005759	mitochondrial matrix	195	8	13.56	0.66747		GO:0010427	abscisic acid binding	73	26	5.28	1.3e-08		GO:0009893	positive regulation of metabolic process	1951	119	133.97	0.631		GO:0016324
GO:0019748	secondary metabolic process	826	48	19.84	0.10502		GO:0000785	chromatin	632	1	15.85	0.74777		GO:0004519	endonuclease activity	3094	8	73.96	0.51419		GO:0033036	macromolecule localization	2801	118	194.46	0.80854		GO:0032592	integral component of mitochondrial membrane	70	8	4.87	0.74752		GO:0016830	carbon-carbon lyase activity	276	26	19.97	0.56282		GO:0051649	establishment of localization in cell	2588	119	177.72	0.68815		GO:0030424
GO:1901566	organonitrogen compound biosynthetic process	2351	48	56.48	0.36687		GO:0000790	nuclear chromatin	221	1	5.54	0.60539		GO:0004709	MAP kinase kinase kinase activity	34	8	0.81	0.00303		GO:0019748	secondary metabolic process	826	118	57.35	0.06468		GO:0098573	intrinsic component of mitochondrial membrane	70	8	4.87	0.74752		GO:0019208	phosphatase regulator activity	170	26	12.3	0.95464		GO:0030163	protein catabolic process	1827	116	125.46	0.17457		GO:0045177
GO:0051649	establishment of localization in cell	2588	48	62.17	0.58628		GO:0000792	heterochromatin	47	1	1.18	0.75471		GO:0004725	protein tyrosine phosphatase activity	83	8	1.98	0.00101		GO:0005976	polysaccharide metabolic process	1033	118	71.72	0.10621		GO:0030135	coated vesicle	246	8	17.11	0.787		GO:0019212	phosphatase inhibitor activity	99	26	7.16	0.80365		GO:0071822	protein complex subunit organization	1371	116	94.15	0.52097		GO:0097458
GO:0043161	proteasome-mediated ubiquitin-dependent protein catabolic process	987	47	23.71	0.00161		GO:0005657	replication fork	114	1	2.86	0.82157		GO:0004970	ionotropic glutamate receptor activity	36	8	0.86	0.05736		GO:0071554	cell wall organization or biogenesis	1412	117	98.03	0.14148		GO:0009279	cell outer membrane	8	7	0.56	2.5e-05		GO:0019840	isoprenoid binding	77	26	5.57	0.5475		GO:0046677	response to antibiotic	575	113	39.49	3.8e-09		GO:0043005
GO:0010498	proteasomal protein catabolic process	1013	47	24.34	0.14215		GO:0005667	transcription factor complex	314	1	7.87	0.21624		GO:0005230	extracellular ligand-gated ion channel activity	36	8	0.86	0.05736		GO:0006790	sulfur compound metabolic process	744	117	51.65	0.00147		GO:0016323	basolateral plasma membrane	69	7	4.8	0.00147		GO:0019888	protein phosphatase regulator activity	158	26	11.43	0.96957		GO:0006520	cellular amino acid metabolic process	1406	113	96.55	0.08243		GO:0000794
GO:0006511	ubiquitin-dependent protein catabolic process	1441	47	34.62	0.14314		GO:0005681	spliceosomal complex	333	1	8.35	0.5114		GO:0008066	glutamate receptor activity	43	8	1.03	0.09064		GO:1901135	carbohydrate derivative metabolic process	2023	115	140.45	0.03343		GO:0005901	caveola	18	7	1.25	0.01735		GO:0031625	ubiquitin protein ligase binding	264	26	19.1	0.30878		GO:0002376	immune system process	1205	112	82.75	0.17416		GO:0005667
GO:0019941	modification-dependent protein catabolic process	1462	47	35.12	0.27046		GO:0005720	nuclear heterochromatin	27	1	0.68	0.94129		GO:0016413	O-acetyltransferase activity	113	8	2.7	0.12903		GO:0051186	cofactor metabolic process	1214	114	84.28	0.02097		GO:0005813	centrosome	80	7	5.56	0.02311		GO:0042562	hormone binding	125	26	9.04	0.07252		GO:0031325	positive regulation of cellular metabolic process	1786	112	122.64	0.59704		GO:0005759
GO:0043632	modification-dependent macromolecule catabolic process	1494	47	35.89	0.34437		GO:0005736	DNA-directed RNA polymerase I complex	58	1	1.45	0.41619		GO:0016765	transferase activity, transferring alkyl or aryl (other than methyl) groups	399	8	9.54	0.41446		GO:0009617	response to bacterium	1024	114	71.09	0.00057		GO:0005815	microtubule organizing center	134	7	9.32	0.08291		GO:0044389	small conjugating protein ligase binding	268	26	19.39	0.30157		GO:0044703	multi-organism reproductive process	1204	111	82.68	0.03055		GO:0005769
GO:0035556	intracellular signal transduction	1265	47	30.39	0.5728		GO:0005741	mitochondrial outer membrane	121	1	3.03	0.75526		GO:0016836	hydro-lyase activity	238	8	5.69	0.47482		GO:0040007	growth	1313	111	91.16	0.32965		GO:0045121	membrane raft	25	7	1.74	0.09553		GO:0051213	dioxygenase activity	316	26	22.86	0.2788		GO:0031324	negative regulation of cellular metabolic process	1519	111	104.31	0.11327		GO:0031968
GO:0051603	proteolysis involved in cellular protein catabolic process	1633	47	39.23	0.63054		GO:0005764	lysosome	119	1	2.98	0.55689		GO:0030170	pyridoxal phosphate binding	310	8	7.41	0.75964		GO:0046394	carboxylic acid biosynthetic process	1498	110	104	0.16681		GO:0070469	respiratory chain	206	7	14.33	0.12765		GO:0060589	nucleoside-triphosphatase regulator activity	263	26	19.03	0.86986		GO:0032989	cellular component morphogenesis	1122	111	77.05	0.33781		GO:0045121
GO:0044257	cellular protein catabolic process	1668	47	40.07	0.68382		GO:0005798	Golgi-associated vesicle	170	1	4.26	0.35743		GO:0031406	carboxylic acid binding	252	8	6.02	0.47758		GO:0044255	cellular lipid metabolic process	1910	110	132.6	0.69006		GO:0071013	catalytic step 2 spliceosome	117	7	8.14	0.58022		GO:0061134	peptidase regulator activity	315	26	22.79	0.2861		GO:0009408	response to heat	624	110	42.85	1.4e-07		GO:0070971
GO:0044265	cellular macromolecule catabolic process	2166	47	52.03	0.73395		GO:0005813	centrosome	80	1	2.01	0.10638		GO:0043177	organic acid binding	252	8	6.02	0.47758		GO:0016053	organic acid biosynthetic process	1498	110	104	0.16681		GO:0009986	cell surface	75	7	5.22	0.82095		GO:0003779	actin binding	302	25	21.85	0.18759		GO:0042592	homeostatic process	1400	109	96.14	0.84467		GO:0035838
GO:0030163	protein catabolic process	1827	47	43.89	0.9105		GO:0005815	microtubule organizing center	134	1	3.36	0.15241		GO:0003779	actin binding	302	7	7.22	0.41003		GO:0009893	positive regulation of metabolic process	1951	108	135.45	0.7507		GO:0005657	replication fork	114	7	7.93	0.87856		GO:0008080	N-acetyltransferase activity	219	25	15.84	0.01153		GO:0044257	cellular protein catabolic process	1668	107	114.54	0.13141		GO:0005813
GO:0010629	negative regulation of gene expression	1497	46	35.96	0.59779		GO:0005819	spindle	173	1	4.34	0.33599		GO:0004620	phospholipase activity	124	7	2.96	0.29547		GO:0065009	regulation of molecular function	1327	107	92.13	0.84575		GO:0031968	organelle outer membrane	257	7	17.87	0.89503		GO:0016410	N-acyltransferase activity	238	25	17.22	0.01154		GO:0033036	macromolecule localization	2801	107	192.34	0.79299		GO:0048475
GO:0071215	cellular response to abscisic acid stimulus	611	45	14.68	0.04952		GO:0005853	eukaryotic translation elongation factor 1 complex	8	1	0.2	0.48512		GO:0004722	protein serine/threonine phosphatase activity	211	7	5.04	0.05442		GO:0030163	protein catabolic process	1827	107	126.84	0.98228		GO:0016607	nuclear speck	188	7	13.07	0.90923		GO:0022838	substrate-specific channel activity	483	25	34.94	0.17742		GO:0070647	protein modification by small protein conjugation or removal	1843	106	126.56	0.1026		GO:0030117
GO:0071396	cellular response to lipid	879	45	21.12	0.10797		GO:0005871	kinesin complex	140	1	3.51	0.69738		GO:0004805	trehalose-phosphatase activity	31	7	0.74	0.06956		GO:0048827	phyllome development	1096	105	76.09	0.95777		GO:0030313	cell envelope	8	7	0.56	1		GO:0051536	iron-sulfur cluster binding	380	24	27.49	0.41846		GO:0000902	cell morphogenesis	1010	106	69.36	0.21151		GO:0090404
GO:0097306	cellular response to alcohol	745	45	17.9	0.14954		GO:0005875	microtubule associated complex	260	1	6.52	0.82256		GO:0005388	calcium-transporting ATPase activity	82	7	1.96	0.25047		GO:0046907	intracellular transport	2289	105	158.91	0.68271		GO:0005873	plus-end kinesin complex	7	6	0.49	0.00016		GO:0051540	metal cluster binding	380	24	27.49	0.41846		GO:0065009	regulation of molecular function	1327	105	91.12	0.76598		GO:0000148
GO:1901135	carbohydrate derivative metabolic process	2023	44	48.6	0.0132		GO:0005876	spindle microtubule	59	1	1.48	0.0965		GO:0008236	serine-type peptidase activity	615	7	14.7	0.00802		GO:0046677	response to antibiotic	575	105	39.92	1.2e-07		GO:0044815	DNA packaging complex	255	6	17.73	0.01247		GO:0000287	magnesium ion binding	558	23	40.37	0.52012		GO:0009617	response to bacterium	1024	102	70.32	0.03061		GO:0030660
GO:0051173	positive regulation of nitrogen compound metabolic process	1639	44	39.37	0.30422		GO:0005929	cilium	79	1	1.98	0.90263		GO:0015662	ATPase activity, coupled to transmembrane movement of ions, phosphorylative mechanism	109	7	2.61	0.39066		GO:0031325	positive regulation of cellular metabolic process	1786	105	123.99	0.91004		GO:1990104	DNA bending complex	247	6	17.18	0.01327		GO:0005198	structural molecule activity	1602	23	115.9	0.25851		GO:0008610	lipid biosynthetic process	1537	102	105.55	0.37276		GO:0005815
GO:0005976	polysaccharide metabolic process	1033	44	24.82	0.51658		GO:0005930	axoneme	33	1	0.83	0.47858		GO:0016679	oxidoreductase activity, acting on diphenols and related substances as donors	203	7	4.85	0.12874		GO:0022607	cellular component assembly	2092	104	145.24	0.2695		GO:0000786	nucleosome	247	6	17.18	0.01327		GO:0008238	exopeptidase activity	346	23	25.03	0.0036		GO:0051128	regulation of cellular component organization	1201	102	82.47	0.56157		GO:0030662
GO:0006790	sulfur compound metabolic process	744	43	17.87	0.07106		GO:0008622	epsilon DNA polymerase complex	20	1	0.5	0.00386		GO:0016682	oxidoreductase activity, acting on diphenols and related substances as donors, oxygen as acceptor	169	7	4.04	0.20495		GO:0009408	response to heat	624	104	43.32	2.2e-06		GO:0035838	growing cell tip	34	6	2.36	0.02011		GO:0016701	oxidoreductase activity, acting on single donors with incorporation of molecular oxygen	213	23	15.41	0.15164		GO:0051173	positive regulation of nitrogen compound metabolic process	1639	102	112.55	0.65614		GO:0090406
GO:0071496	cellular response to external stimulus	574	43	13.79	0.66084		GO:0009524	phragmoplast	127	1	3.18	0.80657		GO:0017171	serine hydrolase activity	615	7	14.7	1		GO:0022622	root system development	1195	103	82.96	0.19854		GO:0005876	spindle microtubule	59	6	4.1	0.02815		GO:0030414	peptidase inhibitor activity	309	23	22.35	0.30057		GO:0051172	negative regulation of nitrogen compound metabolic process	1395	101	95.79	0.03702		GO:0098552
GO:0031668	cellular response to extracellular stimulus	545	43	13.09	0.68701		GO:0015030	Cajal body	31	1	0.78	0.51899		GO:0019203	carbohydrate phosphatase activity	64	7	1.53	0.27258		GO:0007049	cell cycle	1708	103	118.58	0.99115		GO:0048475	coated membrane	222	6	15.44	0.02865		GO:0031072	heat shock protein binding	127	23	9.19	0.35847		GO:0048589	developmental growth	1000	101	68.67	0.13799		GO:0009504
GO:0009991	response to extracellular stimulus	714	43	17.15	0.79516		GO:0016324	apical plasma membrane	109	1	2.73	0.14142		GO:0019829	cation-transporting ATPase activity	243	7	5.81	0.76524		GO:0071396	cellular response to lipid	879	102	61.02	0.02223		GO:0030117	membrane coat	222	6	15.44	0.02865		GO:0003924	GTPase activity	760	22	54.98	0.52265		GO:0010604	positive regulation of macromolecule metabolic process	1768	101	121.41	0.77888		GO:0030427
GO:0006812	cation transport	1184	41	28.44	0.02066		GO:0016469	proton-transporting two-sector ATPase complex	183	1	4.59	0.88586		GO:0031625	ubiquitin protein ligase binding	264	7	6.31	0.50566		GO:0048585	negative regulation of response to stimulus	814	102	56.51	0.29035		GO:0030427	site of polarized growth	44	6	3.06	0.07622		GO:0004866	endopeptidase inhibitor activity	305	22	22.07	0.3481		GO:0046394	carboxylic acid biosynthetic process	1498	100	102.87	0.26389		GO:0000152
GO:0009738	abscisic acid-activated signaling pathway	559	41	13.43	0.0518		GO:0019867	outer membrane	280	1	7.02	0.78659		GO:0035251	UDP-glucosyltransferase activity	289	7	6.91	0.70369		GO:0044257	cellular protein catabolic process	1668	102	115.8	0.88897		GO:0030660	Golgi-associated vesicle membrane	142	6	9.88	0.09054		GO:0010181	FMN binding	124	22	8.97	0.05383		GO:0016053	organic acid biosynthetic process	1498	100	102.87	0.26389		GO:0000775
GO:0045934	negative regulation of nucleobase-containing compound metabolic process	942	41	22.63	0.14704		GO:0022626	cytosolic ribosome	350	1	8.78	0.60658		GO:0042625	ATPase activity, coupled to transmembrane movement of ions	244	7	5.83	0.74271		GO:0010038	response to metal ion	850	102	59.01	0.21802		GO:0090404	pollen tube tip	31	6	2.16	0.10311		GO:0016759	cellulose synthase activity	129	22	9.33	0.05294		GO:0046907	intracellular transport	2289	100	157.18	0.62179		GO:0048471
GO:0022622	root system development	1195	41	28.71	0.23646		GO:0030016	myofibril	66	1	1.66	1		GO:0044389	small conjugating protein ligase binding	268	7	6.41	0.48306		GO:0009611	response to wounding	544	102	37.77	7.7e-09		GO:0044438	microbody part	102	6	7.09	0.15147		GO:0016760	cellulose synthase (UDP-forming) activity	128	22	9.26	0.04884		GO:0051186	cofactor metabolic process	1214	99	83.37	0.02489		GO:0010287
GO:0048364	root development	1191	41	28.61	0.25061		GO:0030017	sarcomere	66	1	1.66	1		GO:0046527	glucosyltransferase activity	315	7	7.53	0.53568		GO:0031327	negative regulation of cellular biosynthetic process	1094	101	75.95	0.02507		GO:0044439	peroxisomal part	102	6	7.09	0.15147		GO:0050661	NADP binding	290	22	20.98	0.37592		GO:0051603	proteolysis involved in cellular protein catabolic process	1633	99	112.14	0.18649		GO:0043601
GO:0010038	response to metal ion	850	41	20.42	0.25096		GO:0030018	Z disc	64	1	1.6	0.00218		GO:0051015	actin filament binding	118	7	2.82	0.56469		GO:0009890	negative regulation of biosynthetic process	1107	101	76.85	0.02385		GO:0009654	photosystem II oxygen evolving complex	74	6	5.15	0.15477		GO:0061135	endopeptidase regulator activity	305	22	22.07	0.3481		GO:0032446	protein modification by small protein conjugation	1635	98	112.27	0.14291		GO:0030894
GO:0009653	anatomical structure morphogenesis	2207	41	53.02	0.36479		GO:0030135	coated vesicle	246	1	6.17	0.73556		GO:0051087	chaperone binding	119	7	2.84	0.54776		GO:0006396	RNA processing	2464	101	171.06	0.2026		GO:0030424	axon	84	6	5.84	0.22102		GO:0005216	ion channel activity	437	21	31.61	0.17851		GO:0022622	root system development	1195	98	82.06	0.19303		GO:0043596
GO:1902679	negative regulation of RNA biosynthetic process	788	40	18.93	0.01439		GO:0030136	clathrin-coated vesicle	132	1	3.31	0.70556		GO:0000287	magnesium ion binding	558	6	13.34	0.50265		GO:0010558	negative regulation of macromolecule biosynthetic process	994	100	69.01	0.02107		GO:0097458	neuron part	116	6	8.07	0.25509		GO:0008061	chitin binding	73	21	5.28	0.00094		GO:0043632	modification-dependent macromolecule catabolic process	1494	97	102.59	0.04358		GO:0009279
GO:0009890	negative regulation of biosynthetic process	1107	40	26.59	0.01827		GO:0030141	secretory granule	42	1	1.05	0.26461		GO:0004252	serine-type endopeptidase activity	352	6	8.41	0.38398		GO:0048364	root development	1191	99	82.69	0.21041		GO:0043005	neuron projection	103	6	7.16	0.29818		GO:0015036	disulfide oxidoreductase activity	270	21	19.53	0.77218		GO:0014070	response to organic cyclic compound	961	97	65.99	0.22059		GO:0030120
GO:0031327	negative regulation of cellular biosynthetic process	1094	40	26.28	0.01994		GO:0030176	integral component of endoplasmic reticulum membrane	148	1	3.71	0.21228		GO:0004866	endopeptidase inhibitor activity	305	6	7.29	0.29564		GO:0042742	defense response to bacterium	863	99	59.91	0.01361		GO:0090406	pollen tube	147	6	10.22	0.31895		GO:0015932	nucleobase-containing compound transmembrane transporter activity	243	21	17.58	0.38486		GO:0080134	regulation of response to stress	1112	97	76.36	0.53203		GO:0030141
GO:0010558	negative regulation of macromolecule biosynthetic process	994	40	23.88	0.02231		GO:0030424	axon	84	1	2.11	0.17024		GO:0005198	structural molecule activity	1602	6	38.3	0.07559		GO:0032989	cellular component morphogenesis	1122	99	77.9	0.36442		GO:0030662	coated vesicle membrane	183	6	12.73	0.37619		GO:0016413	O-acetyltransferase activity	113	21	8.17	0.33684		GO:0006790	sulfur compound metabolic process	744	96	51.09	0.00035		GO:0031903
GO:0051253	negative regulation of RNA metabolic process	858	40	20.61	0.16328		GO:0030894	replisome	51	1	1.28	0.99623		GO:0005319	lipid transporter activity	102	6	2.44	0.01995		GO:0043933	macromolecular complex subunit organization	1925	98	133.64	0.46094		GO:0000418	DNA-directed RNA polymerase IV complex	43	6	2.99	0.45812		GO:0005342	organic acid transmembrane transporter activity	210	20	15.19	0.32435		GO:0006511	ubiquitin-dependent protein catabolic process	1441	96	98.95	0.01778		GO:0005778
GO:0044255	cellular lipid metabolic process	1910	40	45.88	0.61571		GO:0031227	intrinsic component of endoplasmic reticulum membrane	149	1	3.74	0.22002		GO:0005543	phospholipid binding	356	6	8.51	0.13082		GO:0008104	protein localization	2273	98	157.8	0.84778		GO:0031304	intrinsic component of mitochondrial inner membrane	40	6	2.78	0.51879		GO:0016763	transferase activity, transferring pentosyl groups	228	20	16.49	0.69013		GO:0071396	cellular response to lipid	879	96	60.36	0.03073		GO:0005746
GO:0009408	response to heat	624	39	14.99	0.00278		GO:0031514	motile cilium	22	1	0.55	0.5933		GO:0008047	enzyme activator activity	300	6	7.17	0.85721		GO:0048584	positive regulation of response to stimulus	812	96	56.37	0.01348		GO:0031305	integral component of mitochondrial inner membrane	40	6	2.78	0.51879		GO:0046943	carboxylic acid transmembrane transporter activity	210	20	15.19	0.32435		GO:0019941	modification-dependent protein catabolic process	1462	96	100.4	0.03409		GO:0005615
GO:0009753	response to jasmonic acid	535	39	12.85	0.01015		GO:0031674	I band	64	1	1.6	1		GO:0008519	ammonium transmembrane transporter activity	33	6	0.79	0.09376		GO:0043632	modification-dependent macromolecule catabolic process	1494	96	103.72	0.58182		GO:0080008	Cul4-RING E3 ubiquitin ligase complex	142	6	9.88	0.666		GO:0004525	ribonuclease III activity	79	19	5.72	0.0001		GO:0016049	cell growth	818	96	56.17	0.07374		GO:0009705
GO:0042542	response to hydrogen peroxide	470	39	11.29	0.01529		GO:0031968	organelle outer membrane	257	1	6.44	0.86893		GO:0008757	S-adenosylmethionine-dependent methyltransferase activity	481	6	11.5	0.15794		GO:0042592	homeostatic process	1400	96	97.2	0.99903		GO:0000502	proteasome complex	245	6	17.04	0.81938		GO:0004722	protein serine/threonine phosphatase activity	211	19	15.26	0.07163		GO:0016567	protein ubiquitination	1562	96	107.26	0.1204		GO:0030137
GO:0006820	anion transport	800	39	19.22	0.10971		GO:0031969	chloroplast membrane	301	1	7.55	0.48851		GO:0015078	hydrogen ion transmembrane transporter activity	473	6	11.31	0.04868		GO:0000902	cell morphogenesis	1010	96	70.12	0.20349		GO:0010008	endosome membrane	129	6	8.97	0.93176		GO:0022836	gated channel activity	331	19	23.95	0.05147		GO:0000302	response to reactive oxygen species	674	96	46.28	0.49399		GO:0030663
GO:0048869	cellular developmental process	2217	39	53.26	0.62639		GO:0031983	vesicle lumen	13	1	0.33	0.3565		GO:0015101	organic cation transmembrane transporter activity	33	6	0.79	0.09376		GO:0051603	proteolysis involved in cellular protein catabolic process	1633	95	113.37	0.93021		GO:0098687	chromosomal region	199	6	13.84	0.97798		GO:0032296	double-stranded RNA-specific ribonuclease activity	79	19	5.72	1		GO:0010243	response to organonitrogen compound	646	96	44.36	0.73301		GO:0016607
GO:0010604	positive regulation of macromolecule metabolic process	1768	39	42.47	0.70834		GO:0032421	stereocilium bundle	56	1	1.4	0.38454		GO:0015292	uniporter activity	14	6	0.33	0.00221		GO:0044703	multi-organism reproductive process	1204	95	83.59	0.21429		GO:0045178	basal part of cell	6	5	0.42	0.00015		GO:0051015	actin filament binding	118	19	8.54	0.11036		GO:0048580	regulation of post-embryonic development	930	95	63.86	0.35794		GO:0030313
GO:0010150	leaf senescence	322	38	7.74	0.00091		GO:0032838	cell projection cytoplasm	35	1	0.88	0.42299		GO:0015932	nucleobase-containing compound transmembrane transporter activity	243	6	5.81	0.20153		GO:0019941	modification-dependent protein catabolic process	1462	95	101.5	0.48978		GO:0070971	endoplasmic reticulum exit site	10	5	0.7	0.02381		GO:0004675	transmembrane receptor protein serine/threonine kinase activity	283	18	20.47	0.08151		GO:0010629	negative regulation of gene expression	1497	95	102.8	0.87588		GO:0005873
GO:0009751	response to salicylic acid	291	38	6.99	0.01098		GO:0032993	protein-DNA complex	491	1	12.31	0.85173		GO:0022853	active ion transmembrane transporter activity	70	6	1.67	0.07307		GO:0006812	cation transport	1184	94	82.2	0.08497		GO:0030428	cell septum	12	5	0.83	0.04496		GO:0005085	guanyl-nucleotide exchange factor activity	112	18	8.1	0.16068		GO:0006812	cation transport	1184	94	81.3	0.02336		GO:0016323
GO:0046394	carboxylic acid biosynthetic process	1498	38	35.99	0.25647		GO:0033176	proton-transporting V-type ATPase complex	66	1	1.66	0.93654		GO:0030414	peptidase inhibitor activity	309	6	7.39	0.2504		GO:0006511	ubiquitin-dependent protein catabolic process	1441	94	100.04	0.31756		GO:0000935	barrier septum	12	5	0.83	0.04496		GO:0008237	metallopeptidase activity	353	18	25.54	0.11341		GO:0048364	root development	1191	94	81.79	0.20468		GO:0032432
GO:0016053	organic acid biosynthetic process	1498	38	35.99	0.25647		GO:0033177	proton-transporting two-sector ATPase complex, proton-transporting domain	70	1	1.76	0.07343		GO:0030599	pectinesterase activity	230	6	5.5	0.43781		GO:0051173	positive regulation of nitrogen compound metabolic process	1639	93	113.79	0.91356		GO:0030120	vesicle coat	157	5	10.92	0.04675		GO:0016903	oxidoreductase activity, acting on the aldehyde or oxo group of donors	319	18	23.08	0.70338		GO:0010038	response to metal ion	850	94	58.37	0.28651		GO:0030286
GO:2000241	regulation of reproductive process	857	38	20.59	0.31923		GO:0033179	proton-transporting V-type ATPase, V0 domain	37	1	0.93	0.24123		GO:0033293	monocarboxylic acid binding	107	6	2.56	0.11253		GO:0048468	cell development	1015	93	70.47	0.34243		GO:0030286	dynein complex	39	5	2.71	0.08496		GO:0019199	transmembrane receptor protein kinase activity	294	18	21.27	0.10687		GO:0044264	cellular polysaccharide metabolic process	722	94	49.58	0.57833		GO:0009528
GO:0044264	cellular polysaccharide metabolic process	722	38	17.34	0.36003		GO:0034045	pre-autophagosomal structure membrane	25	1	0.63	0.52083		GO:0042562	hormone binding	125	6	2.99	0.01408		GO:0045934	negative regulation of nucleobase-containing compound metabolic process	942	93	65.4	0.11151		GO:0005663	DNA replication factor C complex	31	5	2.16	0.10703		GO:0019842	vitamin binding	171	18	12.37	0.7263		GO:0044255	cellular lipid metabolic process	1910	94	131.16	0.66094		GO:0030126
GO:0008610	lipid biosynthetic process	1537	38	36.92	0.36841		GO:0034774	secretory granule lumen	13	1	0.33	0.3565		GO:0045735	nutrient reservoir activity	209	6	5	0.0005		GO:0009620	response to fungus	829	92	57.55	0.00153		GO:0030532	small nuclear ribonucleoprotein complex	186	5	12.94	0.13267		GO:0019900	kinase binding	294	18	21.27	0.06197		GO:0048468	cell development	1015	94	69.7	0.69712		GO:0005884
GO:0007568	aging	364	38	8.74	0.53829		GO:0035580	specific granule lumen	3	1	0.08	0.54893		GO:0046910	pectinesterase inhibitor activity	141	6	3.37	0.12033		GO:0097306	cellular response to alcohol	745	91	51.72	0.07639		GO:0097525	spliceosomal snRNP complex	158	5	10.99	0.25575		GO:0019901	protein kinase binding	265	18	19.17	0.01135		GO:1901361	organic cyclic compound catabolic process	1015	94	69.7	0.85608		GO:0009522
GO:0010260	organ senescence	322	38	7.74	1		GO:0036126	sperm flagellum	18	1	0.45	0.6524		GO:0061134	peptidase regulator activity	315	6	7.53	0.28234		GO:0010604	positive regulation of macromolecule metabolic process	1768	91	122.74	0.93152		GO:0098552	side of membrane	83	5	5.77	0.25643		GO:0030145	manganese ion binding	137	18	9.91	0.00031		GO:0019439	aromatic compound catabolic process	986	93	67.71	0.84114		GO:0010494
GO:0031328	positive regulation of cellular biosynthetic process	1359	37	32.65	0.17448		GO:0042575	DNA polymerase complex	38	1	0.95	0.78791		GO:0061135	endopeptidase regulator activity	305	6	7.29	0.29564		GO:0051253	negative regulation of RNA metabolic process	858	90	59.57	0.07342		GO:0097223	sperm part	27	5	1.88	0.35543		GO:0034061	DNA polymerase activity	202	18	14.61	0.89202		GO:0008104	protein localization	2273	93	156.09	0.84594		GO:1902911
GO:0009891	positive regulation of biosynthetic process	1411	37	33.9	0.2469		GO:0042581	specific granule	8	1	0.2	0.20796		GO:1901681	sulfur compound binding	128	6	3.06	0.23398		GO:0048316	seed development	1488	90	103.3	0.02309		GO:0009897	external side of plasma membrane	34	5	2.36	0.37707		GO:0042910	xenobiotic transporter activity	263	18	19.03	0.42976		GO:0019637	organophosphate metabolic process	1832	92	125.8	0.39301		GO:0032155
GO:0071555	cell wall organization	1001	37	24.05	0.30467		GO:0042807	central vacuole	20	1	0.5	0.27497		GO:0004190	aspartic-type endopeptidase activity	279	5	6.67	0.18899		GO:0010154	fruit development	1513	90	105.04	0.02096		GO:0000932	cytoplasmic mRNA processing body	151	5	10.5	0.3786		GO:0045735	nutrient reservoir activity	209	18	15.12	0.0014		GO:0016051	carbohydrate biosynthetic process	771	91	52.94	0.35414		GO:0032153
GO:0045229	external encapsulating structure organization	1083	37	26.02	0.37415		GO:0043005	neuron projection	103	1	2.58	0.22233		GO:0004521	endoribonuclease activity	1403	5	33.54	0.99991		GO:0048366	leaf development	831	89	57.69	0.90356		GO:0035770	ribonucleoprotein granule	217	5	15.09	0.41027		GO:0051020	GTPase binding	240	18	17.36	0.39294		GO:0009611	response to wounding	544	90	37.36	2.3e-06		GO:0030136
GO:0006996	organelle organization	4344	37	104.36	0.98078		GO:0043292	contractile fiber	66	1	1.66	1		GO:0004540	ribonuclease activity	1549	5	37.03	0.9999		GO:0014070	response to organic cyclic compound	961	89	66.72	0.34258		GO:0036464	cytoplasmic ribonucleoprotein granule	213	5	14.81	0.42939		GO:0051287	NAD binding	269	18	19.46	0.48872		GO:0006073	cellular glucan metabolic process	609	90	41.82	0.38557		GO:0045202
GO:0009816	defense response to bacterium, incompatible interaction	129	36	3.1	6.8e-12		GO:0043596	nuclear replication fork	68	1	1.71	0.99959		GO:0004864	protein phosphatase inhibitor activity	92	5	2.2	0.12301		GO:0010200	response to chitin	365	89	25.34	6.8e-11		GO:0030137	COPI-coated vesicle	67	5	4.66	0.43618		GO:1901681	sulfur compound binding	128	18	9.26	0.16672		GO:0044042	glucan metabolic process	617	90	42.37	0.42715		GO:0042575
GO:0030001	metal ion transport	857	36	20.59	0.02096		GO:0043601	nuclear replisome	51	1	1.28	0.99623		GO:0005345	purine nucleobase transmembrane transporter activity	44	5	1.05	0.00014		GO:1902679	negative regulation of RNA biosynthetic process	788	88	54.71	0.02095		GO:0030663	COPI-coated vesicle membrane	67	5	4.66	0.43618		GO:0005057	receptor signaling protein activity	128	17	9.26	0.09762		GO:0009620	response to fungus	829	89	56.93	0.01855		GO:0000790
GO:0045892	negative regulation of transcription, DNA-templated	737	36	17.71	0.04749		GO:0043680	filiform apparatus	7	1	0.18	0.1941		GO:0005525	GTP binding	1013	5	24.22	0.47505		GO:0051301	cell division	1385	88	96.15	0.80689		GO:0000794	condensed nuclear chromosome	113	5	7.86	0.53468		GO:0015925	galactosidase activity	126	17	9.12	0.2093		GO:0042742	defense response to bacterium	863	88	59.26	0.00521		GO:0009986
GO:2000113	negative regulation of cellular macromolecule biosynthetic process	938	36	22.53	0.06501		GO:0044426	cell wall part	71	1	1.78	0.0856		GO:0008080	N-acetyltransferase activity	219	5	5.24	0.08473		GO:0016051	carbohydrate biosynthetic process	771	88	53.53	0.41959		GO:0000323	lytic vacuole	155	5	10.78	0.53815		GO:0016620	oxidoreductase activity, acting on the aldehyde or oxo group of donors, NAD or NADP as acceptor	263	17	19.03	0.84252		GO:0006955	immune response	1047	88	71.9	0.32867		GO:0008622
GO:0006073	cellular glucan metabolic process	609	36	14.63	0.27203		GO:0044441	ciliary part	58	1	1.45	0.77435		GO:0008422	beta-glucosidase activity	105	5	2.51	0.52208		GO:2000113	negative regulation of cellular macromolecule biosynthetic process	938	87	65.12	0.07277		GO:0016592	mediator complex	172	5	11.96	0.71531		GO:0016651	oxidoreductase activity, acting on NAD(P)H	302	17	21.85	0.36175		GO:0071669	plant-type cell wall organization or biogenesis	546	88	37.49	0.4779		GO:0035619
GO:0044042	glucan metabolic process	617	36	14.82	0.28408		GO:0044445	cytosolic part	428	1	10.73	0.28767		GO:0009001	serine O-acetyltransferase activity	21	5	0.5	0.02554		GO:0071822	protein complex subunit organization	1371	87	95.18	0.52516		GO:0000326	protein storage vacuole	48	5	3.34	0.79267		GO:0003843	1,3-beta-D-glucan synthase activity	54	16	3.91	6.7e-06		GO:0048827	phyllome development	1096	88	75.26	0.83206		GO:0030428
GO:0048831	regulation of shoot system development	598	35	14.37	0.05757		GO:0044449	contractile fiber part	66	1	1.66	1		GO:0010427	abscisic acid binding	73	5	1.75	0.01816		GO:0044264	cellular polysaccharide metabolic process	722	87	50.13	0.19842		GO:0005741	mitochondrial outer membrane	121	5	8.42	0.79508		GO:0008081	phosphoric diester hydrolase activity	188	16	13.6	0.85536		GO:0048584	positive regulation of response to stimulus	812	86	55.76	0.00619		GO:0000935
GO:0032787	monocarboxylic acid metabolic process	1162	35	27.92	0.29326		GO:0044452	nucleolar part	224	1	5.62	0.7334		GO:0015205	nucleobase transmembrane transporter activity	44	5	1.05	1		GO:0022402	cell cycle process	1356	87	94.14	0.86028		GO:0016459	myosin complex	57	5	3.96	0.85533		GO:0015035	protein disulfide oxidoreductase activity	228	16	16.49	0.78237		GO:0009891	positive regulation of biosynthetic process	1411	86	96.89	0.53589		GO:0009574
GO:0046907	intracellular transport	2289	35	54.99	0.42916		GO:0044462	external encapsulating structure part	79	1	1.98	0.47367		GO:0015298	solute:cation antiporter activity	172	5	4.11	0.03374		GO:0071215	cellular response to abscisic acid stimulus	611	86	42.42	0.01583		GO:0005769	early endosome	165	5	11.48	0.8767		GO:0015171	amino acid transmembrane transporter activity	113	16	8.17	0.30329		GO:0097306	cellular response to alcohol	745	85	51.16	0.15486		GO:0009501
GO:0048580	regulation of post-embryonic development	930	35	22.34	0.43735		GO:0044463	cell projection part	134	1	3.36	0.82043		GO:0015299	solute:proton antiporter activity	165	5	3.94	0.03956		GO:0000302	response to reactive oxygen species	674	86	46.79	0.38638		GO:0000322	storage vacuole	63	5	4.38	0.90839		GO:0016702	oxidoreductase activity, acting on single donors with incorporation of molecular oxygen, incorporation of two atoms of oxygen	159	16	11.5	0.00058		GO:0071705	nitrogen compound transport	1245	85	85.49	0.81691		GO:0033267
GO:0044723	single-organism carbohydrate metabolic process	1867	35	44.85	0.45098		GO:0045177	apical part of cell	121	1	3.03	0.22976		GO:0015926	glucosidase activity	152	5	3.63	0.86715		GO:0045229	external encapsulating structure organization	1083	85	75.19	0.10871		GO:0010319	stromule	68	5	4.73	0.94658		GO:0052689	carboxylic ester hydrolase activity	505	16	36.53	0.72898		GO:2000241	regulation of reproductive process	857	83	58.85	0.20752		GO:0010598
GO:0009888	tissue development	1619	35	38.89	0.51381		GO:0055029	nuclear DNA-directed RNA polymerase complex	312	1	7.82	0.95876		GO:0016410	N-acyltransferase activity	238	5	5.69	0.07724		GO:1902582	single-organism intracellular transport	1710	84	118.72	0.91332		GO:0030018	Z disc	64	4	4.45	0.00244		GO:0003735	structural constituent of ribosome	1213	15	87.75	0.27099		GO:0045935	positive regulation of nucleobase-containing compound metabolic process	1313	83	90.16	0.43275		GO:1990351
GO:0031669	cellular response to nutrient levels	481	35	11.56	0.74749		GO:0060205	cytoplasmic membrane-bounded vesicle lumen	13	1	0.33	0.3565		GO:0016412	serine O-acyltransferase activity	21	5	0.5	0.02554		GO:0048589	developmental growth	1000	84	69.43	0.16717		GO:0034663	endoplasmic reticulum chaperone complex	10	4	0.7	0.02769		GO:0003968	RNA-directed RNA polymerase activity	45	15	3.26	0.00099		GO:0031328	positive regulation of cellular biosynthetic process	1359	83	93.32	0.46266		GO:1902495
GO:0065009	regulation of molecular function	1327	35	31.88	0.8224		GO:0070820	tertiary granule	3	1	0.08	0.54893		GO:0016645	oxidoreductase activity, acting on the CH-NH group of donors	91	5	2.18	0.08894		GO:0045184	establishment of protein localization	1917	84	133.09	0.83326		GO:0002177	manchette	9	4	0.63	0.03039		GO:0004565	beta-galactosidase activity	99	15	7.16	0.25422		GO:0048585	negative regulation of response to stimulus	814	83	55.9	0.67213		GO:0030015
GO:0031667	response to nutrient levels	647	35	15.54	0.82513		GO:0097014	ciliary cytoplasm	33	1	0.83	0.47858		GO:0016717	oxidoreductase activity, acting on paired donors, with oxidation of a pair of donors resulting in the reduction of molecular oxygen to two molecules of water	91	5	2.18	0.00969		GO:0044042	glucan metabolic process	617	84	42.84	0.06613		GO:0001669	acrosomal vesicle	9	4	0.63	0.03039		GO:0004568	chitinase activity	66	15	4.77	0.02743		GO:0010558	negative regulation of macromolecule biosynthetic process	994	82	68.26	0.06398		GO:0005664
GO:0009409	response to cold	813	34	19.53	0.0915		GO:0097223	sperm part	27	1	0.68	0.4447		GO:0016853	isomerase activity	1002	5	23.95	0.66633		GO:0019637	organophosphate metabolic process	1832	84	127.19	0.46013		GO:0035618	root hair	11	4	0.77	0.03308		GO:0008026	ATP-dependent helicase activity	259	15	18.74	0.22163		GO:0009890	negative regulation of biosynthetic process	1107	82	76.02	0.0678		GO:0000323
GO:0044712	single-organism catabolic process	1772	34	42.57	0.5572		GO:0097224	sperm connecting piece	18	1	0.45	0.6524		GO:0019001	guanyl nucleotide binding	1028	5	24.57	0.42801		GO:0015031	protein transport	1874	84	130.1	0.84544		GO:0035619	root hair tip	11	4	0.77	0.03308		GO:0017016	Ras GTPase binding	203	15	14.69	0.16891		GO:0031327	negative regulation of cellular biosynthetic process	1094	82	75.12	0.0711		GO:0030014
GO:0034220	ion transmembrane transport	1129	33	27.12	0.02185		GO:0097458	neuron part	116	1	2.91	0.18998		GO:0019139	cytokinin dehydrogenase activity	14	5	0.33	0.01091		GO:0006073	cellular glucan metabolic process	609	84	42.28	0.05661		GO:0016328	lateral plasma membrane	9	4	0.63	0.03446		GO:0031267	small GTPase binding	203	15	14.69	0.16891		GO:0007010	cytoskeleton organization	774	81	53.15	0.50263		GO:0009897
GO:0010817	regulation of hormone levels	936	33	22.49	0.1619		GO:0098590	plasma membrane region	193	1	4.84	0.04468		GO:0019207	kinase regulator activity	118	5	2.82	0.43006		GO:0090567	reproductive shoot system development	1016	83	70.54	0.158		GO:0009531	secondary cell wall	68	4	4.73	0.04534		GO:0043621	protein self-association	254	15	18.38	0.71747		GO:1902582	single-organism intracellular transport	1710	81	117.43	0.89696		GO:0000109
GO:0040007	growth	1313	33	31.54	0.6185		GO:0098687	chromosomal region	199	1	4.99	0.97585		GO:0019208	phosphatase regulator activity	170	5	4.06	0.43679		GO:0071705	nitrogen compound transport	1245	83	86.43	0.86901		GO:0031903	microbody membrane	79	4	5.49	0.06847		GO:0052716	hydroquinone:oxygen oxidoreductase activity	87	15	6.29	0.09942		GO:0009409	response to cold	813	80	55.83	0.07301		GO:0000808
GO:0033036	macromolecule localization	2801	33	67.29	0.74844		GO:1990391	DNA repair complex	57	1	1.43	0.96582		GO:0019212	phosphatase inhibitor activity	99	5	2.37	0.17118		GO:0009908	flower development	1006	83	69.84	0.15801		GO:0005778	peroxisomal membrane	79	4	5.49	0.06847		GO:0070035	purine NTP-dependent helicase activity	259	15	18.74	0.22163		GO:0045087	innate immune response	963	80	66.13	0.12288		GO:0005741
GO:0002682	regulation of immune system process	457	32	10.98	0.06897		GO:0000015	phosphopyruvate hydratase complex	13	0	0.33	0.06441		GO:0019840	isoprenoid binding	77	5	1.84	0.02643		GO:0006974	cellular response to DNA damage stimulus	1212	83	84.14	0.99235		GO:0048226	Casparian strip	63	4	4.38	0.08064		GO:1901505	carbohydrate derivative transporter activity	235	15	17	0.06098		GO:1901657	glycosyl compound metabolic process	977	80	67.09	0.26487		GO:0000502
GO:0050776	regulation of immune response	382	32	9.18	0.22233		GO:0000110	nucleotide-excision repair factor 1 complex	4	0	0.1	0.40545		GO:0019888	protein phosphatase regulator activity	158	5	3.78	0.42604		GO:2000241	regulation of reproductive process	857	82	59.5	0.1555		GO:0031012	extracellular matrix	54	4	3.76	0.09094		GO:0003714	transcription corepressor activity	101	14	7.31	0.03948		GO:0048316	seed development	1488	79	102.18	0.06333		GO:0009527
GO:0045088	regulation of innate immune response	329	31	7.9	0.02169		GO:0000111	nucleotide-excision repair factor 2 complex	4	0	0.1	0.89209		GO:0032561	guanyl ribonucleotide binding	1013	5	24.22	0.47505		GO:0071555	cell wall organization	1001	82	69.49	0.09919		GO:0044426	cell wall part	71	4	4.94	0.11565		GO:0003887	DNA-directed DNA polymerase activity	86	14	6.22	0.02118		GO:0010154	fruit development	1513	79	103.9	0.09124		GO:1990391
GO:0090567	reproductive shoot system development	1016	31	24.41	0.14876		GO:0000118	histone deacetylase complex	56	0	1.4	0.28242		GO:0042973	glucan endo-1,3-beta-D-glucosidase activity	46	5	1.1	0.08354		GO:0051128	regulation of cellular component organization	1201	82	83.38	0.97693		GO:0009574	preprophase band	21	4	1.46	0.12084		GO:0003950	NAD+ ADP-ribosyltransferase activity	110	14	7.96	0.39117		GO:0006974	cellular response to DNA damage stimulus	1212	79	83.23	0.99835		GO:0000781
GO:0009908	flower development	1006	31	24.17	0.15006		GO:0000120	RNA polymerase I transcription factor complex	26	0	0.65	0.95727		GO:0043178	alcohol binding	107	5	2.56	0.02835		GO:0051246	regulation of protein metabolic process	1173	81	81.44	0.96032		GO:0072686	mitotic spindle	42	4	2.92	0.2537		GO:0004222	metalloendopeptidase activity	245	14	17.72	0.00014		GO:0048229	gametophyte development	931	78	63.93	0.02533		GO:0000784
GO:0009787	regulation of abscisic acid-activated signaling pathway	343	31	8.24	0.15152		GO:0000123	histone acetyltransferase complex	123	0	3.08	0.94236		GO:0050661	NADP binding	290	5	6.93	0.54269		GO:0043161	proteasome-mediated ubiquitin-dependent protein catabolic process	987	81	68.52	0.00846		GO:0000776	kinetochore	82	4	5.7	0.31952		GO:0015078	hydrogen ion transmembrane transporter activity	473	14	34.22	0.02591		GO:0071215	cellular response to abscisic acid stimulus	611	78	41.96	0.09646		GO:0035618
GO:0048569	post-embryonic organ development	821	31	19.72	0.18302		GO:0000124	SAGA complex	34	0	0.85	0.97228		GO:0070001	aspartic-type peptidase activity	279	5	6.67	0.18899		GO:0010498	proteasomal protein catabolic process	1013	81	70.33	0.3067		GO:0031594	neuromuscular junction	17	4	1.18	0.33475		GO:0015276	ligand-gated ion channel activity	153	14	11.07	0.06259		GO:0051254	positive regulation of RNA metabolic process	1224	78	84.05	0.31438		GO:0030018
GO:0009723	response to ethylene	441	31	10.59	0.24726		GO:0000126	transcription factor TFIIIB complex	18	0	0.45	0.54739		GO:0000156	phosphorelay response regulator activity	44	4	1.05	0.14959		GO:0009733	response to auxin	920	80	63.87	0.21457		GO:0009522	photosystem I	95	4	6.61	0.38855		GO:0015926	glucosidase activity	152	14	11	0.47851		GO:0010557	positive regulation of macromolecule biosynthetic process	1307	78	89.75	0.5181		GO:0045178
GO:0010557	positive regulation of macromolecule biosynthetic process	1307	31	31.4	0.29352		GO:0000127	transcription factor TFIIIC complex	3	0	0.08	0.38503		GO:0002083	4-hydroxybenzoate decaprenyltransferase activity	9	4	0.22	0.04076		GO:0048580	regulation of post-embryonic development	930	79	64.57	0.31311		GO:0005667	transcription factor complex	314	4	21.84	0.39818		GO:0016208	AMP binding	60	14	4.34	0.00829		GO:0034220	ion transmembrane transport	1129	76	77.53	0.00846		GO:0031965
GO:1901419	regulation of response to alcohol	404	31	9.71	0.34335		GO:0000131	incipient cellular bud site	2	0	0.05	0.81461		GO:0002094	polyprenyltransferase activity	23	4	0.55	0.04489		GO:0043603	cellular amide metabolic process	999	79	69.36	0.30458		GO:0042575	DNA polymerase complex	38	4	2.64	0.40441		GO:0016597	amino acid binding	96	14	6.95	0.26816		GO:0009908	flower development	1006	76	69.08	0.08139		GO:0000922
GO:0030154	cell differentiation	1714	31	41.18	0.7249		GO:0000137	Golgi cis cisterna	4	0	0.1	0.74196		GO:0003713	transcription coactivator activity	93	4	2.22	0.14975		GO:0034637	cellular carbohydrate biosynthetic process	518	79	35.96	0.21968		GO:0005736	DNA-directed RNA polymerase I complex	58	4	4.03	0.42007		GO:0016831	carboxy-lyase activity	177	14	12.81	0.3869		GO:0090567	reproductive shoot system development	1016	76	69.77	0.11076		GO:0051233
GO:0048585	negative regulation of response to stimulus	814	31	19.55	0.82003		GO:0000138	Golgi trans cisterna	5	0	0.13	0.97737		GO:0003714	transcription corepressor activity	101	4	2.41	0.10198		GO:0030001	metal ion transport	857	79	59.5	0.09083		GO:0030126	COPI vesicle coat	62	4	4.31	0.4619		GO:0016836	hydro-lyase activity	238	14	17.22	0.64125		GO:2000113	negative regulation of cellular macromolecule biosynthetic process	938	76	64.41	0.12495		GO:0016328
GO:0016192	vesicle-mediated transport	1602	31	38.49	0.88986		GO:0000152	nuclear ubiquitin ligase complex	90	0	2.26	0.80389		GO:0003830	beta-1,4-mannosylglycoprotein 4-beta-N-acetylglucosaminyltransferase activity	21	4	0.5	0.04455		GO:0009738	abscisic acid-activated signaling pathway	559	78	38.81	0.0179		GO:0005779	integral component of peroxisomal membrane	27	4	1.88	0.48731		GO:0016860	intramolecular oxidoreductase activity	201	14	14.54	0.92794		GO:0048366	leaf development	831	76	57.06	0.89685		GO:0009533
GO:0010628	positive regulation of gene expression	1272	30	30.56	0.055		GO:0000153	cytoplasmic ubiquitin ligase complex	5	0	0.13	0.0278		GO:0003924	GTPase activity	760	4	18.17	0.50956		GO:0050790	regulation of catalytic activity	997	77	69.22	0.88494		GO:0031231	intrinsic component of peroxisomal membrane	27	4	1.88	0.48731		GO:0019200	carbohydrate kinase activity	113	14	8.17	0.1406		GO:0006091	generation of precursor metabolites and energy	807	75	55.42	0.17438		GO:0000779
GO:0044703	multi-organism reproductive process	1204	30	28.92	0.17207		GO:0000159	protein phosphatase type 2A complex	62	0	1.55	0.75273		GO:0003950	NAD+ ADP-ribosyltransferase activity	110	4	2.63	0.76676		GO:0031328	positive regulation of cellular biosynthetic process	1359	77	94.35	0.76369		GO:0045202	synapse	45	4	3.13	0.62135		GO:0022834	ligand-gated channel activity	153	14	11.07	0.06259		GO:0065003	macromolecular complex assembly	1506	75	103.42	0.2564		GO:0000795
GO:0045935	positive regulation of nucleobase-containing compound metabolic process	1313	30	31.54	0.34736		GO:0000164	protein phosphatase type 1 complex	10	0	0.25	0.03361		GO:0003993	acid phosphatase activity	120	4	2.87	0.13487		GO:0009891	positive regulation of biosynthetic process	1411	77	97.96	0.79654		GO:0000419	DNA-directed RNA polymerase V complex	42	4	2.92	0.65403		GO:0051537	2 iron, 2 sulfur cluster binding	84	14	6.08	0.04902		GO:0050790	regulation of catalytic activity	997	75	68.46	0.8135		GO:0005663
GO:0050790	regulation of catalytic activity	997	30	23.95	0.83287		GO:0000172	ribonuclease MRP complex	8	0	0.2	0.75497		GO:0004012	phospholipid-translocating ATPase activity	37	4	0.88	0.14919		GO:0048569	post-embryonic organ development	821	76	57	0.21124		GO:0005720	nuclear heterochromatin	27	4	1.88	0.66035		GO:0000976	transcription regulatory region sequence-specific DNA binding	464	13	33.57	0.15387		GO:0042542	response to hydrogen peroxide	470	74	32.27	9.3e-05		GO:0035861
GO:0045893	positive regulation of transcription, DNA-templated	1108	29	26.62	0.06		GO:0000176	nuclear exosome (RNase complex)	33	0	0.83	0.65656		GO:0004364	glutathione transferase activity	93	4	2.22	0.16341		GO:0045892	negative regulation of transcription, DNA-templated	737	75	51.17	0.08038		GO:0000792	heterochromatin	47	4	3.27	0.73542		GO:0003678	DNA helicase activity	225	13	16.28	0.97306		GO:0010628	positive regulation of gene expression	1272	74	87.35	0.1124		GO:0045273
GO:1902680	positive regulation of RNA biosynthetic process	1162	29	27.92	0.14947		GO:0000177	cytoplasmic exosome (RNase complex)	38	0	0.95	0.90838		GO:0004435	phosphatidylinositol phospholipase C activity	17	4	0.41	0.09683		GO:1901657	glycosyl compound metabolic process	977	74	67.83	0.31508		GO:0005643	nuclear pore	98	4	6.82	0.78308		GO:0003899	DNA-directed RNA polymerase activity	261	13	18.88	0.61256		GO:0006396	RNA processing	2464	74	169.2	0.2417		GO:0036477
GO:0051254	positive regulation of RNA metabolic process	1224	29	29.4	0.16227		GO:0000178	exosome (RNase complex)	53	0	1.33	0.91033		GO:0004506	squalene monooxygenase activity	19	4	0.45	0.24444		GO:0045935	positive regulation of nucleobase-containing compound metabolic process	1313	73	91.16	0.84137		GO:0046930	pore complex	102	4	7.09	0.80811		GO:0004867	serine-type endopeptidase inhibitor activity	136	13	9.84	0.05331		GO:0009733	response to auxin	920	74	63.18	0.33923		GO:0030425
GO:0010647	positive regulation of cell communication	464	29	11.15	0.19316		GO:0000214	tRNA-intron endonuclease complex	3	0	0.08	0.12738		GO:0004629	phospholipase C activity	30	4	0.72	0.05375		GO:0031347	regulation of defense response	713	73	49.5	0.00335		GO:0000775	chromosome, centromeric region	126	4	8.76	0.86943		GO:0005088	Ras guanyl-nucleotide exchange factor activity	79	13	5.72	0.22949		GO:0045934	negative regulation of nucleobase-containing compound metabolic process	942	74	64.69	0.46645		GO:0097447
GO:0023056	positive regulation of signaling	437	29	10.5	0.21922		GO:0000220	vacuolar proton-transporting V-type ATPase, V0 domain	7	0	0.18	0.66893		GO:0004659	prenyltransferase activity	101	4	2.41	0.02083		GO:0070727	cellular macromolecule localization	1832	72	127.19	0.63772		GO:0000152	nuclear ubiquitin ligase complex	90	4	6.26	0.88082		GO:0005089	Rho guanyl-nucleotide exchange factor activity	75	13	5.43	0.17913		GO:0009738	abscisic acid-activated signaling pathway	559	73	38.39	0.06541		GO:0005749
GO:0015711	organic anion transport	474	29	11.39	0.55871		GO:0000221	vacuolar proton-transporting V-type ATPase, V1 domain	3	0	0.08	0.98688		GO:0004683	calmodulin-dependent protein kinase activity	64	4	1.53	0.25467		GO:1901361	organic cyclic compound catabolic process	1015	71	70.47	0.8817		GO:0016591	DNA-directed RNA polymerase II, holoenzyme	216	4	15.02	0.95022		GO:0008135	translation factor activity, nucleic acid binding	497	13	35.96	0.59839		GO:0034637	cellular carbohydrate biosynthetic process	518	72	35.57	0.11115		GO:0045257
GO:0042592	homeostatic process	1400	29	33.63	0.96169		GO:0000229	cytoplasmic chromosome	18	0	0.45	0.08431		GO:0004708	MAP kinase kinase activity	15	4	0.36	0.08059		GO:0071496	cellular response to external stimulus	574	71	39.85	0.35769		GO:0030016	myofibril	66	4	4.59	1		GO:0016810	hydrolase activity, acting on carbon-nitrogen (but not peptide) bonds	281	13	20.33	0.41673		GO:0060560	developmental growth involved in morphogenesis	652	72	44.77	0.25539		GO:0045281
GO:0044085	cellular component biogenesis	3012	28	72.36	0.24817		GO:0000242	pericentriolar material	4	0	0.1	0.56762		GO:0004712	protein serine/threonine/tyrosine kinase activity	73	4	1.75	0.22972		GO:0006457	protein folding	571	71	39.64	0.00636		GO:0030017	sarcomere	66	4	4.59	1		GO:0019207	kinase regulator activity	118	13	8.54	0.14464		GO:0032787	monocarboxylic acid metabolic process	1162	72	79.79	0.49083		GO:0045283
GO:0048468	cell development	1015	28	24.38	0.69994		GO:0000243	commitment complex	38	0	0.95	0.48371		GO:0005372	water transmembrane transporter activity	46	4	1.1	1		GO:0051254	positive regulation of RNA metabolic process	1224	70	84.98	0.57163		GO:0044449	contractile fiber part	66	4	4.59	1		GO:0019829	cation-transporting ATPase activity	243	13	17.58	0.44307		GO:0006928	cellular component movement	496	72	34.06	0.82954		GO:0000776
GO:0006520	cellular amino acid metabolic process	1406	27	33.78	0.11145		GO:0000274	mitochondrial proton-transporting ATP synthase, stator stalk	7	0	0.18	0.653		GO:0005548	phospholipid transporter activity	49	4	1.17	0.07738		GO:0016049	cell growth	818	70	56.79	0.50015		GO:0031674	I band	64	4	4.45	1		GO:0030695	GTPase regulator activity	203	13	14.69	0.877		GO:0030001	metal ion transport	857	71	58.85	0.03783		GO:0031594
GO:0009967	positive regulation of signal transduction	367	27	8.82	0.1422		GO:0000275	mitochondrial proton-transporting ATP synthase complex, catalytic core F(1)	23	0	0.58	0.11921		GO:0008172	S-methyltransferase activity	13	4	0.31	0.59933		GO:0009991	response to extracellular stimulus	714	70	49.57	0.78692		GO:0043292	contractile fiber	66	4	4.59	1		GO:0042625	ATPase activity, coupled to transmembrane movement of ions	244	13	17.65	0.42672		GO:0000271	polysaccharide biosynthetic process	495	71	33.99	0.18752		GO:0016442
GO:0072330	monocarboxylic acid biosynthetic process	660	27	15.86	0.31766		GO:0000276	mitochondrial proton-transporting ATP synthase complex, coupling factor F(o)	22	0	0.55	0.23781		GO:0008199	ferric iron binding	24	4	0.57	0.0953		GO:0032787	monocarboxylic acid metabolic process	1162	69	80.67	0.48958		GO:0045252	oxoglutarate dehydrogenase complex	9	3	0.63	0.00295		GO:0046915	transition metal ion transmembrane transporter activity	141	13	10.2	0.34762		GO:0016192	vesicle-mediated transport	1602	71	110.01	0.70335		GO:0031332
GO:1902582	single-organism intracellular transport	1710	27	41.08	0.74054		GO:0000307	cyclin-dependent protein kinase holoenzyme complex	23	0	0.58	0.10122		GO:0008883	glutamyl-tRNA reductase activity	18	4	0.43	0.22807		GO:0019439	aromatic compound catabolic process	986	68	68.45	0.86811		GO:0016327	apicolateral plasma membrane	3	3	0.21	0.00476		GO:0060590	ATPase regulator activity	60	13	4.34	0.77055		GO:0048878	chemical homeostasis	831	70	57.06	0.15234		GO:0030176
GO:0048316	seed development	1488	26	35.75	0.00815		GO:0000311	plastid large ribosomal subunit	14	0	0.35	0.63953		GO:0008898	S-adenosylmethionine-homocysteine S-methyltransferase activity	5	4	0.12	0.00201		GO:0010557	positive regulation of macromolecule biosynthetic process	1307	68	90.74	0.85417		GO:0005923	tight junction	3	3	0.21	0.00476		GO:0070008	serine-type exopeptidase activity	183	13	13.24	0.1956		GO:1902680	positive regulation of RNA biosynthetic process	1162	70	79.79	0.35974		GO:0031227
GO:0044036	cell wall macromolecule metabolic process	338	26	8.12	0.10419		GO:0000312	plastid small ribosomal subunit	3	0	0.08	0.41048		GO:0009916	alternative oxidase activity	28	4	0.67	0.00169		GO:0009409	response to cold	813	68	56.44	0.17925		GO:0005918	septate junction	3	3	0.21	0.00476		GO:0001671	ATPase activator activity	37	12	2.68	0.00072		GO:0019725	cellular homeostasis	830	70	57	0.488		GO:0097223
GO:0051186	cofactor metabolic process	1214	26	29.16	0.3079		GO:0000313	organellar ribosome	37	0	0.93	0.71654		GO:0015171	amino acid transmembrane transporter activity	113	4	2.7	0.71275		GO:0031668	cellular response to extracellular stimulus	545	67	37.84	0.34091		GO:0097574	lateral part of cell	3	3	0.21	0.00476		GO:0003680	AT DNA binding	56	12	4.05	0.02529		GO:0009664	plant-type cell wall organization	362	69	24.86	5.5e-07		GO:0005788
GO:0010154	fruit development	1513	26	36.35	0.33489		GO:0000314	organellar small ribosomal subunit	11	0	0.28	0.39718		GO:0015250	water channel activity	46	4	1.1	0.00225		GO:0010628	positive regulation of gene expression	1272	67	88.31	0.22201		GO:0045169	fusome	3	3	0.21	0.00476		GO:0004527	exonuclease activity	393	12	28.43	0.65222		GO:0010498	proteasomal protein catabolic process	1013	69	69.56	0.02593		GO:0005764
GO:0051301	cell division	1385	26	33.27	0.65213		GO:0000315	organellar large ribosomal subunit	20	0	0.5	0.7975		GO:0016165	linoleate 13S-lipoxygenase activity	12	4	0.29	0.03149		GO:0009753	response to jasmonic acid	535	67	37.14	0.01874		GO:0005828	kinetochore microtubule	19	3	1.32	0.01186		GO:0008422	beta-glucosidase activity	105	12	7.6	0.45498		GO:0043161	proteasome-mediated ubiquitin-dependent protein catabolic process	987	69	67.78	0.03725		GO:0000326
GO:0071705	nitrogen compound transport	1245	26	29.91	0.85136		GO:0000324	fungal-type vacuole	15	0	0.38	0.9809		GO:0016651	oxidoreductase activity, acting on NAD(P)H	302	4	7.22	0.39718		GO:0007017	microtubule-based process	763	67	52.97	0.10667		GO:0005849	mRNA cleavage factor complex	64	3	4.45	0.02777		GO:0016627	oxidoreductase activity, acting on the CH-CH group of donors	216	12	15.63	0.55368		GO:1901615	organic hydroxy compound metabolic process	718	69	49.3	0.06708		GO:0009707
GO:0051246	regulation of protein metabolic process	1173	26	28.18	0.97331		GO:0000327	lytic vacuole within protein storage vacuole	8	0	0.2	0.57745		GO:0016759	cellulose synthase activity	129	4	3.08	0.90176		GO:0044706	multi-multicellular organism process	872	66	60.54	0.04054		GO:0009501	amyloplast	32	3	2.23	0.02884		GO:0016638	oxidoreductase activity, acting on the CH-NH2 group of donors	114	12	8.25	0.08425		GO:0009826	unidimensional cell growth	589	69	40.45	0.10433		GO:0000322
GO:0051093	negative regulation of developmental process	545	25	13.09	0.12673		GO:0000329	fungal-type vacuole membrane	6	0	0.15	0.82917		GO:0016760	cellulose synthase (UDP-forming) activity	128	4	3.06	0.8945		GO:0016192	vesicle-mediated transport	1602	66	111.22	0.62422		GO:0019897	extrinsic component of plasma membrane	102	3	7.09	0.04246		GO:0016762	xyloglucan:xyloglucosyl transferase activity	121	12	8.75	0.53006		GO:0000278	mitotic cell cycle	742	69	50.95	0.59753		GO:0030016
GO:0048589	developmental growth	1000	25	24.02	0.33359		GO:0000331	contractile vacuole	2	0	0.05	0.80207		GO:0016763	transferase activity, transferring pentosyl groups	228	4	5.45	0.65645		GO:0010817	regulation of hormone levels	936	66	64.98	0.20791		GO:0033267	axon part	16	3	1.11	0.109		GO:0019887	protein kinase regulator activity	110	12	7.96	0.10104		GO:0048569	post-embryonic organ development	821	68	56.38	0.09896		GO:0030017
GO:0015849	organic acid transport	333	25	8	0.68584		GO:0000346	transcription export complex	13	0	0.33	0.43162		GO:0016846	carbon-sulfur lyase activity	104	4	2.49	0.2673		GO:0009856	pollination	864	66	59.98	0.04485		GO:0043296	apical junction complex	4	3	0.28	0.20834		GO:0046912	transferase activity, transferring acyl groups, acyl groups converted into alkyl on transfer	39	12	2.82	0.51279		GO:0045893	positive regulation of transcription, DNA-templated	1108	68	76.09	0.16595		GO:0044449
GO:0046942	carboxylic acid transport	333	25	8	0.68584		GO:0000347	THO complex	42	0	1.05	0.29744		GO:0016891	endoribonuclease activity, producing 5'-phosphomonoesters	1304	4	31.17	0.99992		GO:0019725	cellular homeostasis	830	65	57.62	0.81703		GO:0030496	midbody	12	3	0.83	0.22859		GO:0003724	RNA helicase activity	239	11	17.29	0.31418		GO:0070727	cellular macromolecule localization	1832	68	125.8	0.5365		GO:0031674
GO:0015698	inorganic anion transport	199	24	4.78	0.21294		GO:0000408	EKC/KEOPS complex	4	0	0.1	0.6419		GO:0016893	endonuclease activity, active with either ribo- or deoxyribonucleic acids and producing 5'-phosphomonoesters	1318	4	31.51	0.99992		GO:0016458	gene silencing	648	65	44.99	0.635		GO:0000795	synaptonemal complex	20	3	1.39	0.23472		GO:0004523	RNA-DNA hybrid ribonuclease activity	1173	11	84.86	0.99993		GO:0006260	DNA replication	633	68	43.47	0.85154		GO:0043292
GO:0042445	hormone metabolic process	576	24	13.84	0.28874		GO:0000421	autophagic vacuole membrane	6	0	0.15	0.82844		GO:0019209	kinase activator activity	20	4	0.48	0.06711		GO:0055086	nucleobase-containing small molecule metabolic process	1312	64	91.09	0.58452		GO:0008023	transcription elongation factor complex	69	3	4.8	0.25559		GO:0008276	protein methyltransferase activity	216	11	15.63	0.95734		GO:0051246	regulation of protein metabolic process	1173	68	80.55	0.95409		GO:0045252
GO:1901657	glycosyl compound metabolic process	977	24	23.47	0.3603		GO:0000427	plastid-encoded plastid RNA polymerase complex	13	0	0.33	0.34644		GO:0019842	vitamin binding	171	4	4.09	0.9241		GO:0051276	chromosome organization	1573	64	109.21	0.99717		GO:0097526	spliceosomal tri-snRNP complex	96	3	6.68	0.26829		GO:0008375	acetylglucosaminyltransferase activity	115	11	8.32	0.00741		GO:0070271	protein complex biogenesis	971	67	66.68	0.34547		GO:0016327
GO:0009733	response to auxin	920	24	22.1	0.44208		GO:0000439	core TFIIH complex	28	0	0.7	0.30284		GO:0019887	protein kinase regulator activity	110	4	2.63	0.37203		GO:0048878	chemical homeostasis	831	64	57.69	0.41578		GO:0000813	ESCRT I complex	22	3	1.53	0.32612		GO:0008519	ammonium transmembrane transporter activity	33	11	2.39	0.00994		GO:0006461	protein complex assembly	970	67	66.61	0.346		GO:0005923
GO:0044272	sulfur compound biosynthetic process	322	24	7.74	0.479		GO:0000444	MIS12/MIND type complex	4	0	0.1	0.42075		GO:0030295	protein kinase activator activity	20	4	0.48	0.06711		GO:0048229	gametophyte development	931	64	64.63	0.08411		GO:0005684	U2-type spliceosomal complex	93	3	6.47	0.36686		GO:0009001	serine O-acetyltransferase activity	21	11	1.52	0.00016		GO:0045184	establishment of protein localization	1917	67	131.64	0.8457		GO:0005918
GO:0019725	cellular homeostasis	830	24	19.94	0.53241		GO:0000445	THO complex part of transcription export complex	13	0	0.33	0.43162		GO:0030976	thiamine pyrophosphate binding	66	4	1.58	0.00051		GO:0016052	carbohydrate catabolic process	660	64	45.82	0.32102		GO:0036477	somatodendritic compartment	24	3	1.67	0.4239		GO:0015101	organic cation transmembrane transporter activity	33	11	2.39	1		GO:0015031	protein transport	1874	67	128.69	0.85784		GO:0097574
GO:0023057	negative regulation of signaling	409	24	9.83	0.67704		GO:0000500	RNA polymerase I upstream activating factor complex	18	0	0.45	0.86618		GO:0035091	phosphatidylinositol binding	184	4	4.4	0.12899		GO:0007010	cytoskeleton organization	774	64	53.74	0.70979		GO:0030425	dendrite	24	3	1.67	0.4239		GO:0015144	carbohydrate transmembrane transporter activity	130	11	9.4	0.03709		GO:0051276	chromosome organization	1573	67	108.02	0.99771		GO:0045169
GO:0010648	negative regulation of cell communication	409	24	9.83	0.67704		GO:0000502	proteasome complex	245	0	6.14	0.74116		GO:0042389	omega-3 fatty acid desaturase activity	7	4	0.17	0.00066		GO:0000160	phosphorelay signal transduction system	354	64	24.58	0.00042		GO:0097447	dendritic tree	24	3	1.67	0.4239		GO:0016412	serine O-acyltransferase activity	21	11	1.52	1		GO:0009642	response to light intensity	349	66	23.97	0.25193		GO:0032133
GO:0009968	negative regulation of signal transduction	404	24	9.71	0.70108		GO:0000506	glycosylphosphatidylinositol-N-acetylglucosaminyltransferase (GPI-GnT) complex	8	0	0.2	0.10608		GO:0047293	4-hydroxybenzoate nonaprenyltransferase activity	9	4	0.22	0.04076		GO:1902680	positive regulation of RNA biosynthetic process	1162	63	80.67	0.44729		GO:0030015	CCR4-NOT core complex	66	3	4.59	0.42914		GO:0016645	oxidoreductase activity, acting on the CH-NH group of donors	91	11	6.58	0.18956		GO:0006281	DNA repair	1059	66	72.72	0.9957		GO:0009569
GO:1901617	organic hydroxy compound biosynthetic process	434	23	10.43	0.07844		GO:0000775	chromosome, centromeric region	126	0	3.16	0.79066		GO:0047987	hydroperoxide dehydratase activity	17	4	0.41	0.12613		GO:0050832	defense response to fungus	622	63	43.18	0.10049		GO:0046540	U4/U6 x U5 tri-snRNP complex	83	3	5.77	0.42964		GO:0016838	carbon-oxygen lyase activity, acting on phosphates	238	11	17.22	0.3908		GO:0055086	nucleobase-containing small molecule metabolic process	1312	65	90.09	0.53686		GO:0043036
GO:0043900	regulation of multi-organism process	486	23	11.68	0.08303		GO:0000776	kinetochore	82	0	2.06	0.3048		GO:0050664	oxidoreductase activity, acting on NAD(P)H, oxygen as acceptor	24	4	0.57	0.02552		GO:0042542	response to hydrogen peroxide	470	63	32.63	0.00034		GO:0032838	cell projection cytoplasm	35	3	2.43	0.48683		GO:0042054	histone methyltransferase activity	133	11	9.62	0.86408		GO:1902679	negative regulation of RNA biosynthetic process	788	64	54.11	0.07478		GO:0000229
GO:0012501	programmed cell death	524	23	12.59	0.17956		GO:0000777	condensed chromosome kinetochore	42	0	1.05	0.16108		GO:1901981	phosphatidylinositol phosphate binding	94	4	2.25	0.04556		GO:0032268	regulation of cellular protein metabolic process	1019	63	70.74	0.98013		GO:1902555	endoribonuclease complex	49	3	3.41	0.48912		GO:0042973	glucan endo-1,3-beta-D-glucosidase activity	46	11	3.33	0.00349		GO:0050832	defense response to fungus	622	64	42.71	0.111		GO:0005849
GO:1901615	organic hydroxy compound metabolic process	718	23	17.25	0.1929		GO:0000778	condensed nuclear chromosome kinetochore	38	0	0.95	0.16608		GO:1902936	phosphatidylinositol bisphosphate binding	43	4	1.03	0.05141		GO:0009814	defense response, incompatible interaction	520	63	36.1	0.03087		GO:0036452	ESCRT complex	44	3	3.06	0.49567		GO:0051119	sugar transmembrane transporter activity	125	11	9.04	0.03445		GO:0010817	regulation of hormone levels	936	64	64.27	0.13535		GO:0002177
GO:0046686	response to cadmium ion	532	23	12.78	0.22404		GO:0000779	condensed chromosome, centromeric region	55	0	1.38	0.16112		GO:0000976	transcription regulatory region sequence-specific DNA binding	464	3	11.09	0.1157		GO:0009735	response to cytokinin	525	63	36.45	0.13693		GO:0016035	zeta DNA polymerase complex	14	3	0.97	0.52593		GO:0051879	Hsp90 protein binding	29	11	2.1	0.00288		GO:0051253	negative regulation of RNA metabolic process	858	64	58.92	0.47739		GO:0001669
GO:0016265	death	630	23	15.13	0.26964		GO:0000780	condensed nuclear chromosome, centromeric region	43	0	1.08	0.10036		GO:0000981	sequence-specific DNA binding RNA polymerase II transcription factor activity	175	3	4.18	0.29624		GO:0006281	DNA repair	1059	63	73.52	0.97622		GO:0005655	nucleolar ribonuclease P complex	46	3	3.2	0.53253		GO:1901476	carbohydrate transporter activity	130	11	9.4	0.03709		GO:0007018	microtubule-based movement	308	63	21.15	6.7e-05		GO:0009531
GO:0008219	cell death	630	23	15.13	0.26964		GO:0000782	telomere cap complex	26	0	0.65	0.75867		GO:0003680	AT DNA binding	56	3	1.34	0.2321		GO:0065003	macromolecular complex assembly	1506	62	104.55	0.34727		GO:0030681	multimeric ribonuclease P complex	46	3	3.2	0.53253		GO:0000156	phosphorelay response regulator activity	44	10	3.18	0.04089		GO:0016052	carbohydrate catabolic process	660	63	45.32	0.25156		GO:0070069
GO:0007049	cell cycle	1708	23	41.03	0.99215		GO:0000783	nuclear telomere cap complex	26	0	0.65	0.75867		GO:0003729	mRNA binding	638	3	15.25	0.1442		GO:0000271	polysaccharide biosynthetic process	495	62	34.37	0.27064		GO:0030014	CCR4-NOT complex	78	3	5.42	0.56777		GO:0003743	translation initiation factor activity	355	10	25.68	0.72917		GO:0009639	response to red or far red light	404	63	27.74	0.33144		GO:0031907
GO:0051241	negative regulation of multicellular organismal process	397	22	9.54	0.08246		GO:0000786	nucleosome	247	0	6.19	0.00758		GO:0003735	structural constituent of ribosome	1213	3	29	0.20344		GO:0045893	positive regulation of transcription, DNA-templated	1108	61	76.92	0.27054		GO:0030677	ribonuclease P complex	50	3	3.48	0.64489		GO:0003755	peptidyl-prolyl cis-trans isomerase activity	230	10	16.64	0.18962		GO:0009856	pollination	864	63	59.33	0.38054		GO:0005782
GO:0016143	S-glycoside metabolic process	196	22	4.71	0.13282		GO:0000789	cytoplasmic chromatin	5	0	0.13	0.04301		GO:0003872	6-phosphofructokinase activity	36	3	0.86	0.27302		GO:0034613	cellular protein localization	1703	61	118.23	0.87816		GO:0045239	tricarboxylic acid cycle enzyme complex	14	3	0.97	0.69662		GO:0004004	ATP-dependent RNA helicase activity	202	10	14.61	0.3284		GO:0044706	multi-multicellular organism process	872	63	59.88	0.38516		GO:0000780
GO:0019760	glucosinolate metabolic process	196	22	4.71	0.13282		GO:0000791	euchromatin	15	0	0.38	0.80232		GO:0003899	DNA-directed RNA polymerase activity	261	3	6.24	0.57578		GO:0034220	ion transmembrane transport	1129	61	78.38	0.04802		GO:0005764	lysosome	119	3	8.28	0.71145		GO:0005096	GTPase activator activity	163	10	11.79	0.82964		GO:0060429	epithelium development	742	63	50.95	0.56693		GO:0009706
GO:0019757	glycosinolate metabolic process	196	22	4.71	0.13282		GO:0000793	condensed chromosome	168	0	4.21	0.50231		GO:0003989	acetyl-CoA carboxylase activity	12	3	0.29	0.05103		GO:1901605	alpha-amino acid metabolic process	729	60	50.61	0.41157		GO:0045240	dihydrolipoyl dehydrogenase complex	11	3	0.77	0.71412		GO:0005102	receptor binding	248	10	17.94	0.10506		GO:0051726	regulation of cell cycle	756	63	51.91	0.61084		GO:0005750
GO:0098660	inorganic ion transmembrane transport	714	22	17.15	0.14203		GO:0000794	condensed nuclear chromosome	113	0	2.83	0.61674		GO:0004089	carbonate dehydratase activity	34	3	0.81	0.01929		GO:0032259	methylation	1198	60	83.17	0.12864		GO:0030136	clathrin-coated vesicle	132	3	9.18	0.73647		GO:0005319	lipid transporter activity	102	10	7.38	0.05459		GO:0022603	regulation of anatomical structure morphogenesis	467	62	32.07	0.05094		GO:0045275
GO:0098656	anion transmembrane transport	351	22	8.43	0.4352		GO:0000795	synaptonemal complex	20	0	0.5	0.4394		GO:0004222	metalloendopeptidase activity	245	3	5.86	5.2e-05		GO:0031667	response to nutrient levels	647	60	44.92	0.85443		GO:0031312	extrinsic component of organelle membrane	36	3	2.5	0.84958		GO:0005337	nucleoside transmembrane transporter activity	196	10	14.18	0.23655		GO:0046686	response to cadmium ion	532	62	36.53	0.06117		GO:0009508
GO:0009627	systemic acquired resistance	206	21	4.95	0.02279		GO:0000796	condensin complex	8	0	0.2	0.12525		GO:0004325	ferrochelatase activity	9	3	0.22	0.15611		GO:0007568	aging	364	60	25.27	0.43372		GO:0009527	plastid outer membrane	140	3	9.74	0.90883		GO:0005543	phospholipid binding	356	10	25.75	0.17022		GO:0009991	response to extracellular stimulus	714	62	49.03	0.80321		GO:0032580
GO:0009735	response to cytokinin	525	21	12.61	0.09654		GO:0000798	nuclear cohesin complex	13	0	0.33	0.22884		GO:0004351	glutamate decarboxylase activity	10	3	0.24	0.19701		GO:0000904	cell morphogenesis involved in differentiation	585	60	40.61	0.17942		GO:0044798	nuclear transcription factor complex	228	3	15.86	0.95343		GO:0008094	DNA-dependent ATPase activity	204	10	14.76	0.93981		GO:1901419	regulation of response to alcohol	404	61	27.74	0.22167		GO:0031201
GO:0044706	multi-multicellular organism process	872	21	20.95	0.11429		GO:0000799	nuclear condensin complex	1	0	0.03	0.22758		GO:0004523	RNA-DNA hybrid ribonuclease activity	1173	3	28.04	0.99993		GO:0060429	epithelium development	742	59	51.51	0.49325		GO:0005682	U5 snRNP	57	3	3.96	0.96775		GO:0008170	N-methyltransferase activity	234	10	16.93	0.90855		GO:0009555	pollen development	629	61	43.19	0.25183		GO:0030532
GO:0009856	pollination	864	21	20.76	0.13278		GO:0000800	lateral element	3	0	0.08	0.23002		GO:0004675	transmembrane receptor protein serine/threonine kinase activity	283	3	6.77	0.05261		GO:0046686	response to cadmium ion	532	59	36.93	0.0685		GO:0070160	occluding junction	3	3	0.21	1		GO:0008186	RNA-dependent ATPase activity	202	10	14.61	0.3284		GO:0097237	cellular response to toxic substance	279	60	19.16	5.7e-07		GO:0048226
GO:0043067	regulation of programmed cell death	282	21	6.77	0.32461		GO:0000802	transverse filament	2	0	0.05	0.55964		GO:0004707	MAP kinase activity	50	3	1.2	0.44135		GO:0033692	cellular polysaccharide biosynthetic process	429	59	29.78	0.15896		GO:0030315	T-tubule	54	2	3.76	0.00136		GO:0008408	3'-5' exonuclease activity	200	10	14.47	0.44324		GO:0009845	seed germination	423	60	29.05	0.00742		GO:0000307
GO:0010941	regulation of cell death	359	21	8.62	0.43203		GO:0000808	origin recognition complex	45	0	1.13	0.87817		GO:0004806	triglyceride lipase activity	25	3	0.6	0.31873		GO:0016071	mRNA metabolic process	1463	59	101.57	0.33819		GO:0014704	intercalated disc	54	2	3.76	0.00136		GO:0010333	terpene synthase activity	216	10	15.63	0.3189		GO:0032259	methylation	1198	60	82.27	0.02919		GO:0044426
GO:0010228	vegetative to reproductive phase transition of meristem	492	21	11.82	0.56675		GO:0000811	GINS complex	3	0	0.08	0.40233		GO:0004867	serine-type endopeptidase inhibitor activity	136	3	3.25	0.05878		GO:0043588	skin development	664	58	46.1	0.55055		GO:0043034	costamere	54	2	3.76	0.00136		GO:0015211	purine nucleoside transmembrane transporter activity	173	10	12.52	0.19248		GO:0090351	seedling development	453	60	31.11	0.42423		GO:0043296
GO:1901605	alpha-amino acid metabolic process	729	21	17.51	0.56962		GO:0000812	Swr1 complex	4	0	0.1	0.92316		GO:0004869	cysteine-type endopeptidase inhibitor activity	244	3	5.83	0.3381		GO:0009639	response to red or far red light	404	58	28.05	0.25186		GO:0009921	auxin efflux carrier complex	3	2	0.21	0.0121		GO:0016671	oxidoreductase activity, acting on a sulfur group of donors, disulfide as acceptor	104	10	7.52	0.60554		GO:0071214	cellular response to abiotic stimulus	412	60	28.29	0.43376		GO:0097525
GO:0000160	phosphorelay signal transduction system	354	21	8.5	0.84214		GO:0000813	ESCRT I complex	22	0	0.55	0.34842		GO:0005102	receptor binding	248	3	5.93	0.06336		GO:0008544	epidermis development	664	58	46.1	0.55055		GO:0009925	basal plasma membrane	3	2	0.21	0.0121		GO:0016717	oxidoreductase activity, acting on paired donors, with oxidation of a pair of donors resulting in the reduction of molecular oxygen to two molecules of water	91	10	6.58	0.00567		GO:0000904	cell morphogenesis involved in differentiation	585	59	40.17	0.70251		GO:0072686
GO:0031349	positive regulation of defense response	240	20	5.77	0.03617		GO:0000814	ESCRT II complex	12	0	0.3	0.45624		GO:0005261	cation channel activity	172	3	4.11	0.15371		GO:0048831	regulation of shoot system development	598	57	41.52	0.10457		GO:0000229	cytoplasmic chromosome	18	2	1.25	0.05297		GO:0016859	cis-trans isomerase activity	246	10	17.8	0.11362		GO:0034613	cellular protein localization	1703	59	116.94	0.81988		GO:0005795
GO:0045089	positive regulation of innate immune response	179	20	4.3	0.05501		GO:0000815	ESCRT III complex	6	0	0.15	0.97728		GO:0005262	calcium channel activity	98	3	2.34	0.07244		GO:0031669	cellular response to nutrient levels	481	57	33.39	0.46982		GO:0030666	endocytic vesicle membrane	15	2	1.04	0.0633		GO:0017048	Rho GTPase binding	56	10	4.05	0.01723		GO:0046700	heterocycle catabolic process	880	59	60.43	0.83473		GO:0030915
GO:0050778	positive regulation of immune response	184	20	4.42	0.07656		GO:0000818	nuclear MIS12/MIND complex	4	0	0.1	0.42075		GO:0005315	inorganic phosphate transmembrane transporter activity	21	3	0.5	0.11303		GO:0023057	negative regulation of signaling	409	57	28.39	0.07023		GO:0009706	chloroplast inner membrane	106	2	7.37	0.09226		GO:0033218	amide binding	165	10	11.94	0.88233		GO:0010200	response to chitin	365	58	25.06	0.0002		GO:0097526
GO:0002684	positive regulation of immune system process	209	20	5.02	0.11141		GO:0000922	spindle pole	38	0	0.95	0.12568		GO:0005546	phosphatidylinositol-4,5-bisphosphate binding	22	3	0.53	0.02324		GO:0010648	negative regulation of cell communication	409	57	28.39	0.07023		GO:0033263	CORVET complex	23	2	1.6	0.09689		GO:0042277	peptide binding	140	10	10.13	0.90893		GO:0000160	phosphorelay signal transduction system	354	58	24.31	0.00039		GO:0030133
GO:0048878	chemical homeostasis	831	20	19.96	0.19525		GO:0000923	equatorial microtubule organizing center	4	0	0.1	0.26608		GO:0008013	beta-catenin binding	12	3	0.29	0.09475		GO:0009968	negative regulation of signal transduction	404	57	28.05	0.05986		GO:0035580	specific granule lumen	3	2	0.21	0.10098		GO:0046982	protein heterodimerization activity	341	10	24.67	0.43798		GO:0006457	protein folding	571	58	39.21	0.12633		GO:0031985
GO:0048527	lateral root development	317	20	7.62	0.28864		GO:0000930	gamma-tubulin complex	18	0	0.45	0.54912		GO:0008017	microtubule binding	434	3	10.37	0.68404		GO:0006820	anion transport	800	57	55.54	0.07145		GO:0070820	tertiary granule	3	2	0.21	0.10098		GO:0072341	modified amino acid binding	51	10	3.69	0.05393		GO:0045892	negative regulation of transcription, DNA-templated	737	58	50.61	0.14987		GO:0005868
GO:0048528	post-embryonic root development	367	20	8.82	0.30717		GO:0000931	gamma-tubulin large complex	9	0	0.23	0.48138		GO:0008028	monocarboxylic acid transmembrane transporter activity	40	3	0.96	0.11994		GO:0031047	gene silencing by RNA	456	56	31.66	0.00441		GO:0070852	cell body fiber	3	2	0.21	0.10637		GO:0072509	divalent inorganic cation transmembrane transporter activity	347	10	25.1	0.30312		GO:0033692	cellular polysaccharide biosynthetic process	429	58	29.46	0.17771		GO:0030658
GO:0048573	photoperiodism, flowering	331	20	7.95	0.35594		GO:0000932	cytoplasmic mRNA processing body	151	0	3.79	0.51871		GO:0008237	metallopeptidase activity	353	3	8.44	0.16488		GO:0010260	organ senescence	322	56	22.35	1		GO:0042406	extrinsic component of endoplasmic reticulum membrane	11	2	0.77	0.12008		GO:0090353	polygalacturonase inhibitor activity	18	10	1.3	7.8e-05		GO:0008544	epidermis development	664	58	45.6	0.60362		GO:0046540
GO:0009648	photoperiodism	348	20	8.36	0.39174		GO:0000936	primary cell septum	4	0	0.1	0.5906		GO:0008378	galactosyltransferase activity	94	3	2.25	0.74671		GO:0010150	leaf senescence	322	56	22.35	0.00047		GO:0034098	Cdc48p-Npl4p-Ufd1p AAA ATPase complex	7	2	0.49	0.12569		GO:1901677	phosphate transmembrane transporter activity	165	10	11.94	0.21011		GO:0043588	skin development	664	58	45.6	0.60362		GO:0044445
GO:0042546	cell wall biogenesis	390	20	9.37	0.47123		GO:0000938	GARP complex	12	0	0.3	0.20161		GO:0008443	phosphofructokinase activity	40	3	0.96	0.52407		GO:0009790	embryo development	1174	56	81.51	0.03975		GO:0032044	DSIF complex	15	2	1.04	0.12823		GO:0004725	protein tyrosine phosphatase activity	83	9	6	0.00713		GO:0071496	cellular response to external stimulus	574	58	39.42	0.64521		GO:0032838
GO:0071369	cellular response to ethylene stimulus	238	20	5.72	0.63299		GO:0000943	retrotransposon nucleocapsid	5	0	0.13	0.69807		GO:0008792	arginine decarboxylase activity	3	3	0.07	0.00268		GO:0009250	glucan biosynthetic process	320	56	22.22	0.02383		GO:0009528	plastid inner membrane	114	2	7.93	0.16564		GO:0004791	thioredoxin-disulfide reductase activity	75	9	5.43	0.53808		GO:0044270	cellular nitrogen compound catabolic process	878	58	60.29	0.93123		GO:0005779
GO:0009743	response to carbohydrate	326	20	7.83	0.68896		GO:0000974	Prp19 complex	19	0	0.48	0.78382		GO:0008970	phosphatidylcholine 1-acylhydrolase activity	21	3	0.5	0.00101		GO:0051273	beta-glucan metabolic process	302	55	20.97	0.02778		GO:0031907	microbody lumen	23	2	1.6	0.168		GO:0005345	purine nucleobase transmembrane transporter activity	44	9	3.18	5.9e-05		GO:0051273	beta-glucan metabolic process	302	58	20.74	1		GO:0031231
GO:0008104	protein localization	2273	20	54.6	0.79294		GO:0001401	mitochondrial sorting and assembly machinery complex	5	0	0.13	0.31141		GO:0015174	basic amino acid transmembrane transporter activity	13	3	0.31	0.1806		GO:0046700	heterocycle catabolic process	880	55	61.09	0.90102		GO:0005782	peroxisomal matrix	23	2	1.6	0.168		GO:0008565	protein transporter activity	203	9	14.69	0.55331		GO:0080167	response to karrikin	207	57	14.21	2.5e-10		GO:1902554
GO:0032268	regulation of cellular protein metabolic process	1019	20	24.48	0.86876		GO:0001405	presequence translocase-associated import motor	8	0	0.2	0.42759		GO:0015631	tubulin binding	479	3	11.45	0.73236		GO:0040008	regulation of growth	551	55	38.25	0.38155		GO:0043660	bacteroid-containing symbiosome	8	2	0.56	0.16847		GO:0008810	cellulase activity	44	9	3.18	0.10098		GO:0040008	regulation of growth	551	57	37.84	0.15247		GO:0022626
GO:0043562	cellular response to nitrogen levels	64	19	1.54	4.7e-05		GO:0001650	fibrillar center	13	0	0.33	0.56343		GO:0016208	AMP binding	60	3	1.43	0.60317		GO:0006753	nucleoside phosphate metabolic process	1111	55	77.13	0.74936		GO:0043661	peribacteroid membrane	8	2	0.56	0.16847		GO:0009916	alternative oxidase activity	28	9	2.03	0.00034		GO:0031668	cellular response to extracellular stimulus	545	57	37.42	0.59727		GO:0005662
GO:0009741	response to brassinosteroid	274	19	6.58	0.22059		GO:0001652	granular component	4	0	0.1	0.7325		GO:0016229	steroid dehydrogenase activity	52	3	1.24	0.41952		GO:0000278	mitotic cell cycle	742	55	51.51	0.8966		GO:0043659	symbiosome	8	2	0.56	0.16847		GO:0015116	sulfate transmembrane transporter activity	64	9	4.63	0.01929		GO:0006820	anion transport	800	56	54.94	0.1284		GO:0045239
GO:0048229	gametophyte development	931	19	22.37	0.28952		GO:0001669	acrosomal vesicle	9	0	0.23	0.05368		GO:0016421	CoA carboxylase activity	13	3	0.31	0.06973		GO:1901615	organic hydroxy compound metabolic process	718	54	49.85	0.2627		GO:0000779	condensed chromosome, centromeric region	55	2	3.83	0.16967		GO:0015205	nucleobase transmembrane transporter activity	44	9	3.18	1		GO:0048285	organelle fission	629	56	43.19	0.21128		GO:0045240
GO:0032940	secretion by cell	373	19	8.96	0.43844		GO:0001673	male germ cell nucleus	4	0	0.1	0.79339		GO:0016614	oxidoreductase activity, acting on CH-OH group of donors	610	3	14.58	0.00892		GO:0090305	nucleic acid phosphodiester bond hydrolysis	1981	54	137.53	0.26123		GO:0042581	specific granule	8	2	0.56	0.18074		GO:0015293	symporter activity	111	9	8.03	0.0597		GO:0034622	cellular macromolecular complex assembly	1218	54	83.64	0.2818		GO:0044456
GO:0044550	secondary metabolite biosynthetic process	457	19	10.98	0.56914		GO:0001674	female germ cell nucleus	3	0	0.08	0.80468		GO:0016616	oxidoreductase activity, acting on the CH-OH group of donors, NAD or NADP as acceptor	511	3	12.22	0.05646		GO:0072330	monocarboxylic acid biosynthetic process	660	54	45.82	0.50754		GO:0034399	nuclear periphery	48	2	3.34	0.18655		GO:0015294	solute:cation symporter activity	104	9	7.52	0.04551		GO:0044093	positive regulation of molecular function	557	54	38.25	0.3439		GO:0005643
GO:0046903	secretion	393	19	9.44	0.57985		GO:0001891	phagocytic cup	11	0	0.28	0.79734		GO:0016638	oxidoreductase activity, acting on the CH-NH2 group of donors	114	3	2.73	0.18267		GO:0060560	developmental growth involved in morphogenesis	652	54	45.27	0.41694		GO:0016363	nuclear matrix	29	2	2.02	0.18677		GO:0016160	amylase activity	61	9	4.41	0.04316		GO:1903047	mitotic cell cycle process	560	54	38.46	0.578		GO:0046930
GO:0009555	pollen development	629	19	15.11	0.64821		GO:0001931	uropod	11	0	0.28	0.98193		GO:0016641	oxidoreductase activity, acting on the CH-NH2 group of donors, oxygen as acceptor	64	3	1.53	0.13358		GO:0006518	peptide metabolic process	567	54	39.36	0.52599		GO:0009508	plastid chromosome	13	2	0.9	0.20688		GO:0016641	oxidoreductase activity, acting on the CH-NH2 group of donors, oxygen as acceptor	64	9	4.63	0.07132		GO:0006753	nucleoside phosphate metabolic process	1111	54	76.29	0.6617		GO:0071013
GO:0001666	response to hypoxia	171	19	4.11	0.72725		GO:0002177	manchette	9	0	0.23	0.05368		GO:0016837	carbon-oxygen lyase activity, acting on polysaccharides	56	3	1.34	0.38059		GO:0071669	plant-type cell wall organization or biogenesis	546	53	37.91	0.2702		GO:0030133	transport vesicle	163	2	11.34	0.20826		GO:0016668	oxidoreductase activity, acting on a sulfur group of donors, NAD(P) as acceptor	101	9	7.31	0.74327		GO:0032268	regulation of cellular protein metabolic process	1019	54	69.97	0.96929		GO:0030880
GO:0036293	response to decreased oxygen levels	183	19	4.4	0.74063		GO:0002178	palmitoyltransferase complex	4	0	0.1	0.85739		GO:0016885	ligase activity, forming carbon-carbon bonds	13	3	0.31	0.06973		GO:0070271	protein complex biogenesis	971	53	67.41	0.39027		GO:0060205	cytoplasmic membrane-bounded vesicle lumen	13	2	0.9	0.22727		GO:0016837	carbon-oxygen lyase activity, acting on polysaccharides	56	9	4.05	0.35534		GO:0000272	polysaccharide catabolic process	327	53	22.45	0.03603		GO:0000428
GO:0070482	response to oxygen levels	188	19	4.52	0.76103		GO:0002189	ribose phosphate diphosphokinase complex	1	0	0.03	0.62451		GO:0019199	transmembrane receptor protein kinase activity	294	3	7.03	0.07632		GO:0044270	cellular nitrogen compound catabolic process	878	53	60.96	0.95507		GO:0031983	vesicle lumen	13	2	0.9	0.22727		GO:0016840	carbon-nitrogen lyase activity	100	9	7.23	0.32344		GO:0009723	response to ethylene	441	53	30.28	0.21525		GO:0055029
GO:0044093	positive regulation of molecular function	557	19	13.38	0.94148		GO:0002199	zona pellucida receptor complex	3	0	0.08	0.77292		GO:0019200	carbohydrate kinase activity	113	3	2.7	0.42086		GO:0009117	nucleotide metabolic process	1100	53	76.37	0.69874		GO:0034774	secretory granule lumen	13	2	0.9	0.22727		GO:0016846	carbon-sulfur lyase activity	104	9	7.52	0.25484		GO:0043603	cellular amide metabolic process	999	53	68.6	0.43739		GO:0005682
GO:0051865	protein autoubiquitination	98	18	2.35	0.00103		GO:0005628	prospore membrane	3	0	0.08	0.02642		GO:0030570	pectate lyase activity	56	3	1.34	0.38059		GO:0008652	cellular amino acid biosynthetic process	702	53	48.74	0.34286		GO:0005784	Sec61 translocon complex	16	2	1.11	0.23499		GO:0016866	intramolecular transferase activity	215	9	15.55	0.70811		GO:0031667	response to nutrient levels	647	53	44.43	0.83092		GO:0032592
GO:0009873	ethylene-activated signaling pathway	204	18	4.9	0.0012		GO:0005640	nuclear outer membrane	4	0	0.1	0.60532		GO:0031072	heat shock protein binding	127	3	3.04	0.53247		GO:0006886	intracellular protein transport	1365	53	94.77	0.86508		GO:0009930	longitudinal side of cell surface	10	2	0.7	0.25228		GO:0030570	pectate lyase activity	56	9	4.05	0.35534		GO:0009644	response to high light intensity	246	52	16.89	0.00013		GO:0098573
GO:0009867	jasmonic acid mediated signaling pathway	313	18	7.52	0.00147		GO:0005642	annulate lamellae	2	0	0.05	0.53403		GO:0043027	cysteine-type endopeptidase inhibitor activity involved in apoptotic process	22	3	0.53	0.55821		GO:0006461	protein complex assembly	970	53	67.34	0.39084		GO:0042383	sarcolemma	58	2	4.03	0.29828		GO:0030976	thiamine pyrophosphate binding	66	9	4.77	0.00014		GO:0031347	regulation of defense response	713	52	48.96	0.00331		GO:0070160
GO:0050801	ion homeostasis	563	18	13.53	0.01483		GO:0005652	nuclear lamina	12	0	0.3	0.01347		GO:0043028	cysteine-type endopeptidase regulator activity involved in apoptotic process	23	3	0.55	0.57791		GO:0002682	regulation of immune system process	457	53	31.73	0.04994		GO:1990023	mitotic spindle midzone	7	2	0.49	0.30417		GO:0043295	glutathione binding	32	9	2.32	0.04921		GO:0009657	plastid organization	584	52	40.1	0.01538		GO:0030315
GO:0071395	cellular response to jasmonic acid stimulus	333	18	8	0.02199		GO:0005655	nucleolar ribonuclease P complex	46	0	1.15	0.48178		GO:0044822	poly(A) RNA binding	638	3	15.25	0.1442		GO:0016482	cytoplasmic transport	1244	52	86.37	0.92596		GO:0051233	spindle midzone	12	2	0.83	0.31251		GO:0043424	protein histidine kinase binding	77	9	5.57	0.19164		GO:0000910	cytokinesis	486	52	33.37	0.10515		GO:0014704
GO:0009909	regulation of flower development	431	18	10.35	0.04021		GO:0005656	nuclear pre-replicative complex	7	0	0.18	0.59872		GO:0047372	acylglycerol lipase activity	21	3	0.5	0.00018		GO:0009723	response to ethylene	441	52	30.62	0.48094		GO:0035861	site of double-strand break	42	2	2.92	0.33407		GO:0060090	binding, bridging	102	9	7.38	0.50393		GO:0009250	glucan biosynthetic process	320	52	21.97	0.23734		GO:0043034
GO:0015893	drug transport	199	18	4.78	0.08997		GO:0005658	alpha DNA polymerase:primase complex	4	0	0.1	0.6234		GO:0047714	galactolipase activity	3	3	0.07	0.00313		GO:1901419	regulation of response to alcohol	404	51	28.05	0.57799		GO:0030658	transport vesicle membrane	147	2	10.22	0.33939		GO:1900750	oligopeptide binding	32	9	2.32	0.04921		GO:0017144	drug metabolic process	552	52	37.91	0.4595		GO:0070531
GO:0006855	drug transmembrane transport	193	18	4.64	0.11164		GO:0005662	DNA replication factor A complex	25	0	0.63	0.96496		GO:0051287	NAD binding	269	3	6.43	0.52743		GO:0090558	plant epidermis development	598	51	41.52	0.48535		GO:0071010	prespliceosome	44	2	3.06	0.41558		GO:1901682	sulfur compound transmembrane transporter activity	74	9	5.35	0.02598		GO:0009117	nucleotide metabolic process	1100	52	75.54	0.60845		GO:0005828
GO:0007166	cell surface receptor signaling pathway	600	18	14.41	0.37225		GO:0005663	DNA replication factor C complex	31	0	0.78	0.05719		GO:0051787	misfolded protein binding	21	3	0.5	0.11625		GO:0051174	regulation of phosphorus metabolic process	560	51	38.88	0.40034		GO:0030915	Smc5-Smc6 complex	23	2	1.6	0.47517		GO:0003682	chromatin binding	394	8	28.5	0.86212		GO:0042886	amide transport	926	52	63.59	0.85852		GO:0031436
GO:0016051	carbohydrate biosynthetic process	771	18	18.52	0.58809		GO:0005664	nuclear origin of replication recognition complex	32	0	0.8	0.9697		GO:1901677	phosphate transmembrane transporter activity	165	3	3.94	0.10078		GO:0044093	positive regulation of molecular function	557	51	38.67	0.4653		GO:0071256	translocon complex	23	2	1.6	0.52921		GO:0003878	ATP citrate synthase activity	12	8	0.87	0.00019		GO:0033043	regulation of organelle organization	742	52	50.95	0.9643		GO:0042406
GO:0032989	cellular component morphogenesis	1122	18	26.95	0.67619		GO:0005665	DNA-directed RNA polymerase II, core complex	57	0	1.43	0.85531		GO:0000250	lanosterol synthase activity	56	2	1.34	0.91283		GO:0030855	epithelial cell differentiation	542	51	37.63	0.3641		GO:0071004	U2-type prespliceosome	30	2	2.09	0.53966		GO:0004177	aminopeptidase activity	134	8	9.69	0.03068		GO:0009787	regulation of abscisic acid-activated signaling pathway	343	51	23.55	0.00652		GO:0035580
GO:0000902	cell morphogenesis	1010	18	24.26	0.71117		GO:0005666	DNA-directed RNA polymerase III complex	81	0	2.03	0.5563		GO:0000987	core promoter proximal region sequence-specific DNA binding	78	2	1.86	0.1742		GO:0019220	regulation of phosphate metabolic process	560	51	38.88	0.40034		GO:0070938	contractile ring	24	2	1.67	0.61274		GO:0004180	carboxypeptidase activity	171	8	12.37	0.02309		GO:0015979	photosynthesis	459	51	31.52	0.01829		GO:0070820
GO:0022402	cell cycle process	1356	18	32.58	0.73777		GO:0005668	RNA polymerase transcription factor SL1 complex	8	0	0.2	0.0222		GO:0001159	core promoter proximal region DNA binding	78	2	1.86	0.1742		GO:0009642	response to light intensity	349	51	24.23	0.41081		GO:0005826	actomyosin contractile ring	24	2	1.67	0.61274		GO:0004185	serine-type carboxypeptidase activity	150	8	10.85	0.04128		GO:0010647	positive regulation of cell communication	464	51	31.86	0.09604		GO:0070852
GO:0034637	cellular carbohydrate biosynthetic process	518	18	12.44	0.75408		GO:0005669	transcription factor TFIID complex	72	0	1.81	0.99867		GO:0003682	chromatin binding	394	2	9.42	0.5014		GO:0009913	epidermal cell differentiation	512	50	35.55	0.28052		GO:0005666	DNA-directed RNA polymerase III complex	81	2	5.63	0.63315		GO:0004402	histone acetyltransferase activity	79	8	5.72	0.07104		GO:0009968	negative regulation of signal transduction	404	51	27.74	0.11312		GO:0034399
GO:0045184	establishment of protein localization	1917	18	46.05	0.77972		GO:0005672	transcription factor TFIIA complex	18	0	0.45	0.70505		GO:0003843	1,3-beta-D-glucan synthase activity	54	2	1.29	0.01186		GO:0006720	isoprenoid metabolic process	556	50	38.6	0.39883		GO:0030176	integral component of endoplasmic reticulum membrane	148	2	10.29	0.64771		GO:0004506	squalene monooxygenase activity	19	8	1.37	0.00645		GO:0023057	negative regulation of signaling	409	51	28.09	0.12978		GO:0031012
GO:0016049	cell growth	818	18	19.65	0.79433		GO:0005673	transcription factor TFIIE complex	7	0	0.18	0.51092		GO:0004305	ethanolamine kinase activity	7	2	0.17	0.19336		GO:1901607	alpha-amino acid biosynthetic process	540	49	37.49	0.41712		GO:0005744	mitochondrial inner membrane presequence translocase complex	62	2	4.31	0.65935		GO:0004659	prenyltransferase activity	101	8	7.31	0.03548		GO:0010648	negative regulation of cell communication	409	51	28.09	0.12978		GO:0043679
GO:0015031	protein transport	1874	18	45.02	0.79916		GO:0005674	transcription factor TFIIF complex	4	0	0.1	0.25649		GO:0004386	helicase activity	682	2	16.3	0.82909		GO:0071214	cellular response to abiotic stimulus	412	49	28.6	0.23043		GO:0044391	ribosomal subunit	394	2	27.4	0.66048		GO:0004673	protein histidine kinase activity	66	8	4.77	0.21805		GO:0000280	nuclear division	534	51	36.67	0.56675		GO:0044306
GO:1902589	single-organism organelle organization	2308	18	55.45	0.99916		GO:0005675	holo TFIIH complex	6	0	0.15	0.79756		GO:0004470	malic enzyme activity	26	2	0.62	0.40134		GO:0034622	cellular macromolecular complex assembly	1218	49	84.56	0.27124		GO:0030864	cortical actin cytoskeleton	32	2	2.23	0.66265		GO:0004805	trehalose-phosphatase activity	31	8	2.24	0.08683		GO:0015833	peptide transport	900	51	61.8	0.72196		GO:0043195
GO:0006887	exocytosis	251	17	6.03	0.00121		GO:0005677	chromatin silencing complex	39	0	0.98	0.97229		GO:0004471	malate dehydrogenase (decarboxylating) (NAD+) activity	26	2	0.62	0.40134		GO:0010608	posttranscriptional regulation of gene expression	709	49	49.22	0.76591		GO:0031227	intrinsic component of endoplasmic reticulum membrane	149	2	10.36	0.66385		GO:0008134	transcription factor binding	300	8	21.7	0.06017		GO:0023056	positive regulation of signaling	437	50	30.01	0.09466		GO:0016363
GO:0042446	hormone biosynthetic process	442	17	10.62	0.01892		GO:0005680	anaphase-promoting complex	53	0	1.33	0.84497		GO:0004843	ubiquitin-specific protease activity	179	2	4.28	0.00553		GO:0009826	unidimensional cell growth	589	49	40.89	0.27285		GO:0005868	cytoplasmic dynein complex	11	2	0.77	0.67945		GO:0015145	monosaccharide transmembrane transporter activity	64	8	4.63	0.06016		GO:0048831	regulation of shoot system development	598	50	41.06	0.12444		GO:0005872
GO:0002237	response to molecule of bacterial origin	93	17	2.23	0.02085		GO:0005682	U5 snRNP	57	0	1.43	0.96246		GO:0005096	GTPase activator activity	163	2	3.9	0.58585		GO:0006575	cellular modified amino acid metabolic process	303	49	21.04	0.21116		GO:0010494	cytoplasmic stress granule	65	2	4.52	0.71224		GO:0016161	beta-amylase activity	47	8	3.4	0.01993		GO:0008283	cell proliferation	384	49	26.37	0.00499		GO:0042581
GO:0035690	cellular response to drug	242	17	5.81	0.0232		GO:0005684	U2-type spliceosomal complex	93	0	2.33	0.31142		GO:0005484	SNAP receptor activity	123	2	2.94	0.75452		GO:0071407	cellular response to organic cyclic compound	513	48	35.62	0.15966		GO:0044441	ciliary part	58	2	4.03	0.7245		GO:0016278	lysine N-methyltransferase activity	137	8	9.91	0.98524		GO:0050801	ion homeostasis	563	49	38.66	0.01356		GO:0036449
GO:0055080	cation homeostasis	498	17	11.96	0.03506		GO:0005685	U1 snRNP	59	0	1.48	0.14375		GO:0008083	growth factor activity	37	2	0.88	0.17721		GO:0042886	amide transport	926	48	64.29	0.86455		GO:0005680	anaphase-promoting complex	53	2	3.69	0.80226		GO:0016279	protein-lysine N-methyltransferase activity	137	8	9.91	0.98524		GO:0009735	response to cytokinin	525	49	36.05	0.06442		GO:0060205
GO:0006817	phosphate ion transport	65	17	1.56	0.06826		GO:0005686	U2 snRNP	16	0	0.4	0.08113		GO:0008234	cysteine-type peptidase activity	548	2	13.1	0.91835		GO:0010647	positive regulation of cell communication	464	48	32.21	0.19903		GO:0030139	endocytic vesicle	49	2	3.41	0.80982		GO:0016298	lipase activity	169	8	12.23	0.44452		GO:0019953	sexual reproduction	370	49	25.41	0.23581		GO:0031983
GO:2000024	regulation of leaf development	159	17	3.82	0.0802		GO:0005687	U4 snRNP	8	0	0.2	0.04406		GO:0008320	protein transmembrane transporter activity	78	2	1.86	0.71023		GO:0009787	regulation of abscisic acid-activated signaling pathway	343	48	23.81	0.00953		GO:0090575	RNA polymerase II transcription factor complex	180	2	12.52	0.84477		GO:0016615	malate dehydrogenase activity	60	8	4.34	0.53375		GO:0045595	regulation of cell differentiation	493	49	33.85	0.34796		GO:0034774
GO:0055082	cellular chemical homeostasis	459	17	11.03	0.17448		GO:0005688	U6 snRNP	14	0	0.35	0.44619		GO:0008447	L-ascorbate oxidase activity	8	2	0.19	0.41885		GO:0009555	pollen development	629	48	43.67	0.6457		GO:0005929	cilium	79	2	5.49	0.87554		GO:0016775	phosphotransferase activity, nitrogenous group as acceptor	66	8	4.77	0.21805		GO:0009698	phenylpropanoid metabolic process	372	49	25.55	0.37188		GO:0030496
GO:0006873	cellular ion homeostasis	408	17	9.8	0.20842		GO:0005689	U12-type spliceosomal complex	35	0	0.88	0.45496		GO:0008565	protein transporter activity	203	2	4.85	0.54596		GO:0006091	generation of precursor metabolites and energy	807	48	56.03	0.55153		GO:0009707	chloroplast outer membrane	128	2	8.9	0.91633		GO:0016782	transferase activity, transferring sulfur-containing groups	159	8	11.5	0.84032		GO:0016071	mRNA metabolic process	1463	49	100.46	0.41753		GO:0009930
GO:0009736	cytokinin-activated signaling pathway	189	17	4.54	0.22065		GO:0005697	telomerase holoenzyme complex	11	0	0.28	0.11251		GO:0008661	1-deoxy-D-xylulose-5-phosphate synthase activity	21	2	0.5	0.10126		GO:1901617	organic hydroxy compound biosynthetic process	434	47	30.13	0.06425		GO:0030867	rough endoplasmic reticulum membrane	65	2	4.52	0.94979		GO:0016811	hydrolase activity, acting on carbon-nitrogen (but not peptide) bonds, in linear amides	155	8	11.21	0.19999		GO:0008652	cellular amino acid biosynthetic process	702	49	48.21	0.45958		GO:0048786
GO:0071368	cellular response to cytokinin stimulus	192	17	4.61	0.24859		GO:0005700	polytene chromosome	8	0	0.2	0.53562		GO:0009815	1-aminocyclopropane-1-carboxylate oxidase activity	9	2	0.22	0.02536		GO:0051093	negative regulation of developmental process	545	47	37.84	0.28978		GO:0005791	rough endoplasmic reticulum	65	2	4.52	0.94979		GO:0018024	histone-lysine N-methyltransferase activity	114	8	8.25	0.97905		GO:0072330	monocarboxylic acid biosynthetic process	660	49	45.32	0.50429		GO:0042383
GO:0070727	cellular macromolecule localization	1832	17	44.01	0.43428		GO:0005701	polytene chromosome chromocenter	3	0	0.08	0.80468		GO:0009931	calcium-dependent protein serine/threonine kinase activity	49	2	1.17	0.25154		GO:0050801	ion homeostasis	563	47	39.09	0.02852		GO:1990391	DNA repair complex	57	2	3.96	0.96213		GO:0019203	carbohydrate phosphatase activity	64	8	4.63	0.27052		GO:0009753	response to jasmonic acid	535	48	36.74	0.00559		GO:0031004
GO:0006631	fatty acid metabolic process	608	17	14.61	0.63886		GO:0005712	chiasma	5	0	0.13	0.85059		GO:0010857	calcium-dependent protein kinase activity	49	2	1.17	0.25154		GO:0050776	regulation of immune response	382	47	26.52	0.15535		GO:0009543	chloroplast thylakoid lumen	46	2	3.2	0.96955		GO:0030599	pectinesterase activity	230	8	16.64	0.54042		GO:0042440	pigment metabolic process	447	48	30.7	0.11745		GO:0090533
GO:0009267	cellular response to starvation	419	17	10.07	0.63965		GO:0005719	nuclear euchromatin	11	0	0.28	0.85087		GO:0015079	potassium ion transmembrane transporter activity	170	2	4.06	0.4085		GO:0023056	positive regulation of signaling	437	47	30.34	0.17905		GO:0031978	plastid thylakoid lumen	46	2	3.2	0.96955		GO:0036459	ubiquitinyl hydrolase activity	293	8	21.2	0.07023		GO:0000226	microtubule cytoskeleton organization	407	48	27.95	0.12325		GO:0098562
GO:0006720	isoprenoid metabolic process	556	17	13.36	0.66338		GO:0005721	pericentric heterochromatin	4	0	0.1	0.54932		GO:0015105	arsenite transmembrane transporter activity	16	2	0.38	0.08074		GO:0015833	peptide transport	900	47	62.48	0.86972		GO:0000781	chromosome, telomeric region	94	2	6.54	0.98956		GO:0070566	adenylyltransferase activity	83	8	6	0.41486		GO:0061640	cytoskeleton-dependent cytokinesis	462	48	31.73	0.15187		GO:0034274
GO:0042594	response to starvation	514	17	12.35	0.84861		GO:0005722	beta-heterochromatin	3	0	0.08	0.80468		GO:0015129	lactate transmembrane transporter activity	3	2	0.07	0.08074		GO:0006397	mRNA processing	1022	47	70.95	0.44519		GO:0000784	nuclear chromosome, telomeric region	74	2	5.15	0.99178		GO:0090595	acetyl-CoA:L-lysine N6-acetyltransferase	79	8	5.72	0.07104		GO:0048646	anatomical structure formation involved in morphogenesis	578	48	39.69	0.34222		GO:0000421
GO:1902074	response to salt	50	16	1.2	0.00014		GO:0005731	nucleolus organizer region	4	0	0.1	0.05296		GO:0015450	P-P-bond-hydrolysis-driven protein transmembrane transporter activity	42	2	1	0.94098		GO:0048528	post-embryonic root development	367	46	25.48	0.0863		GO:0005669	transcription factor TFIID complex	72	2	5.01	0.9922		GO:0003756	protein disulfide isomerase activity	79	7	5.72	0.65008		GO:0071478	cellular response to radiation	269	48	18.47	0.42791		GO:0098533
GO:0009788	negative regulation of abscisic acid-activated signaling pathway	153	16	3.68	0.00468		GO:0005732	small nucleolar ribonucleoprotein complex	65	0	1.63	0.84284		GO:0016160	amylase activity	61	2	1.46	0.17153		GO:0048527	lateral root development	317	46	22.01	0.02202		GO:0043596	nuclear replication fork	68	2	4.73	0.99643		GO:0003993	acid phosphatase activity	120	7	8.68	0.19555		GO:0030855	epithelial cell differentiation	542	48	37.22	0.53938		GO:0010330
GO:0009682	induced systemic resistance	67	16	1.61	0.00961		GO:0005742	mitochondrial outer membrane translocase complex	16	0	0.4	0.77345		GO:0016161	beta-amylase activity	47	2	1.12	0.16099		GO:0040029	regulation of gene expression, epigenetic	623	46	43.25	0.55411		GO:0044291	cell-cell contact zone	54	2	3.76	1		GO:0004176	ATP-dependent peptidase activity	49	7	3.54	0.45829		GO:0090558	plant epidermis development	598	48	41.06	0.61398		GO:0005666
GO:1900055	regulation of leaf senescence	88	16	2.11	0.01048		GO:0005744	mitochondrial inner membrane presequence translocase complex	62	0	1.55	0.60249		GO:0016597	amino acid binding	96	2	2.29	0.52803		GO:0009793	embryo development ending in seed dormancy	1010	46	70.12	0.08653		GO:0008622	epsilon DNA polymerase complex	20	1	1.39	0.00696		GO:0004702	receptor signaling protein serine/threonine kinase activity	84	7	6.08	0.59749		GO:0031669	cellular response to nutrient levels	481	48	33.03	0.75507		GO:0009898
GO:0055065	metal ion homeostasis	446	16	10.71	0.09645		GO:0005746	mitochondrial respiratory chain	147	0	3.69	0.20915		GO:0016615	malate dehydrogenase activity	60	2	1.43	0.35069		GO:0008299	isoprenoid biosynthetic process	478	46	33.19	0.51512		GO:0031430	M band	56	1	3.89	0.00899		GO:0005351	sugar:proton symporter activity	74	7	5.35	0.06837		GO:0009751	response to salicylic acid	291	47	19.98	0.00468		GO:0030672
GO:0006875	cellular metal ion homeostasis	357	16	8.58	0.14367		GO:0005747	mitochondrial respiratory chain complex I	73	0	1.83	0.63992		GO:0016621	cinnamoyl-CoA reductase activity	15	2	0.36	0.01247		GO:1901137	carbohydrate derivative biosynthetic process	1192	45	82.75	0.53869		GO:0030665	clathrin-coated vesicle membrane	69	1	4.8	0.00933		GO:0005355	glucose transmembrane transporter activity	62	7	4.49	0.07761		GO:0009967	positive regulation of signal transduction	367	47	25.2	0.02632		GO:0008021
GO:0071407	cellular response to organic cyclic compound	513	16	12.32	0.19414		GO:0005749	mitochondrial respiratory chain complex II	19	0	0.48	0.30036		GO:0016627	oxidoreductase activity, acting on the CH-CH group of donors	216	2	5.16	0.52787		GO:0006732	coenzyme metabolic process	762	45	52.9	0.02732		GO:0030125	clathrin vesicle coat	62	1	4.31	0.0165		GO:0005402	cation:sugar symporter activity	74	7	5.35	0.06837		GO:0009790	embryo development	1174	47	80.62	0.08353		GO:0044441
GO:0030003	cellular cation homeostasis	383	16	9.2	0.2661		GO:0005750	mitochondrial respiratory chain complex III	42	0	1.05	0.23742		GO:0016628	oxidoreductase activity, acting on the CH-CH group of donors, NAD or NADP as acceptor	83	2	1.98	0.3723		GO:0006412	translation	1990	45	138.16	0.53576		GO:0030118	clathrin coat	87	1	6.05	0.02769		GO:0005527	macrolide binding	42	7	3.04	0.18894		GO:0072521	purine-containing compound metabolic process	864	47	59.33	0.32344		GO:0070382
GO:0010383	cell wall polysaccharide metabolic process	243	16	5.84	0.32121		GO:0005751	mitochondrial respiratory chain complex IV	4	0	0.1	0.77629		GO:0016706	oxidoreductase activity, acting on paired donors, with incorporation or reduction of molecular oxygen, 2-oxoglutarate as one donor, and incorporation of one atom each of oxygen into both donors	76	2	1.82	0.66977		GO:0006066	alcohol metabolic process	503	45	34.92	0.17451		GO:0030874	nucleolar chromatin	8	1	0.56	0.03147		GO:0005528	FK506 binding	42	7	3.04	0.18894		GO:0010015	root morphogenesis	540	47	37.08	0.46663		GO:0005680
GO:0019220	regulation of phosphate metabolic process	560	16	13.45	0.38877		GO:0005753	mitochondrial proton-transporting ATP synthase complex	52	0	1.3	0.07405		GO:0016744	transferase activity, transferring aldehyde or ketonic groups	39	2	0.93	0.44679		GO:0090351	seedling development	453	44	31.45	0.10117		GO:0005686	U2 snRNP	16	1	1.11	0.03378		GO:0008271	secondary active sulfate transmembrane transporter activity	37	7	2.68	0.08156		GO:1901605	alpha-amino acid metabolic process	729	47	50.06	0.54641		GO:0044452
GO:0051174	regulation of phosphorus metabolic process	560	16	13.45	0.38877		GO:0005758	mitochondrial intermembrane space	52	0	1.3	0.88735		GO:0016847	1-aminocyclopropane-1-carboxylate synthase activity	19	2	0.45	0.598		GO:0031399	regulation of protein modification process	549	44	38.11	0.96333		GO:0030140	trans-Golgi network transport vesicle	60	1	4.17	0.0559		GO:0008574	plus-end-directed microtubule motor activity	51	7	3.69	0.53292		GO:0009116	nucleoside metabolic process	730	47	50.13	0.80041		GO:0005776
GO:1901137	carbohydrate derivative biosynthetic process	1192	16	28.64	0.41835		GO:0005759	mitochondrial matrix	195	0	4.89	0.62447		GO:0016860	intramolecular oxidoreductase activity	201	2	4.8	0.9211		GO:0022603	regulation of anatomical structure morphogenesis	467	44	32.42	0.74601		GO:0012510	trans-Golgi network transport vesicle membrane	60	1	4.17	0.0559		GO:0015079	potassium ion transmembrane transporter activity	170	7	12.3	0.75511		GO:0098660	inorganic ion transmembrane transport	714	46	49.03	0.06149		GO:0005929
GO:0072593	reactive oxygen species metabolic process	420	16	10.09	0.62127		GO:0005761	mitochondrial ribosome	19	0	0.48	0.57592		GO:0016866	intramolecular transferase activity	215	2	5.14	0.53251		GO:0009967	positive regulation of signal transduction	367	44	25.48	0.06086		GO:0005905	coated pit	52	1	3.62	0.06651		GO:0015149	hexose transmembrane transporter activity	62	7	4.49	0.07761		GO:0006261	DNA-dependent DNA replication	321	46	22.04	0.14277		GO:0044440
GO:0008299	isoprenoid biosynthetic process	478	16	11.48	0.78884		GO:0005762	mitochondrial large ribosomal subunit	6	0	0.15	0.86092		GO:0016905	myosin heavy chain kinase activity	14	2	0.33	0.32025		GO:0009894	regulation of catabolic process	577	44	40.06	0.927		GO:0030132	clathrin coat of coated pit	52	1	3.62	0.06651		GO:0015295	solute:proton symporter activity	85	7	6.15	0.09406		GO:0072593	reactive oxygen species metabolic process	420	46	28.84	0.24449		GO:0000123
GO:1901420	negative regulation of response to alcohol	177	16	4.25	0.89082		GO:0005763	mitochondrial small ribosomal subunit	8	0	0.2	0.62714		GO:0017022	myosin binding	51	2	1.22	0.73771		GO:0009845	seed germination	423	44	29.37	0.04171		GO:0005731	nucleolus organizer region	4	1	0.28	0.06825		GO:0016796	exonuclease activity, active with either ribo- or deoxyribonucleic acids and producing 5'-phosphomonoesters	123	7	8.9	0.26113		GO:0007568	aging	364	46	25	0.43144		GO:0005839
GO:0042538	hyperosmotic salinity response	105	15	2.52	0.00157		GO:0005765	lysosomal membrane	37	0	0.93	0.64157		GO:0017056	structural constituent of nuclear pore	41	2	0.98	0.49698		GO:0009751	response to salicylic acid	291	44	20.2	0.00586		GO:0030130	clathrin coat of trans-Golgi network vesicle	54	1	3.76	0.07282		GO:0016847	1-aminocyclopropane-1-carboxylate synthase activity	19	7	1.37	0.03036		GO:0010150	leaf senescence	322	45	22.11	0.0008		GO:0031312
GO:0097237	cellular response to toxic substance	279	15	6.7	0.01097		GO:0005766	primary lysosome	8	0	0.2	0.85597		GO:0019783	small conjugating protein-specific protease activity	197	2	4.71	0.74765		GO:0018193	peptidyl-amino acid modification	784	43	54.43	0.67767		GO:0009569	chloroplast starch grain	10	1	0.7	0.09476		GO:0016861	intramolecular oxidoreductase activity, interconverting aldoses and ketoses	76	7	5.5	0.072		GO:0030243	cellulose metabolic process	222	45	15.24	0.00815		GO:0016459
GO:0002831	regulation of response to biotic stimulus	300	15	7.21	0.02786		GO:0005770	late endosome	138	0	3.46	0.95616		GO:0019843	rRNA binding	236	2	5.64	0.34381		GO:0006749	glutathione metabolic process	108	43	7.5	8.3e-09		GO:0043036	starch grain	10	1	0.7	0.09476		GO:0016864	intramolecular oxidoreductase activity, transposing S-S bonds	79	7	5.72	0.65008		GO:0009814	defense response, incompatible interaction	520	45	35.71	0.03996		GO:0010008
GO:0042435	indole-containing compound biosynthetic process	125	15	3	0.05099		GO:0005771	multivesicular body	41	0	1.03	0.49323		GO:0019900	kinase binding	294	2	7.03	0.08724		GO:0071368	cellular response to cytokinin stimulus	192	42	13.33	0.69839		GO:0012511	monolayer-surrounded lipid storage body	42	1	2.92	0.10072		GO:0016872	intramolecular lyase activity	69	7	4.99	0.18		GO:0010564	regulation of cell cycle process	414	45	28.43	0.07127		GO:0031248
GO:0009789	positive regulation of abscisic acid-activated signaling pathway	151	15	3.63	0.06164		GO:0005775	vacuolar lumen	16	0	0.4	0.86945		GO:0019901	protein kinase binding	265	2	6.33	0.0256		GO:0055082	cellular chemical homeostasis	459	42	31.87	0.18738		GO:0000922	spindle pole	38	1	2.64	0.12396		GO:0019904	protein domain specific binding	121	7	8.75	0.05593		GO:0042445	hormone metabolic process	576	45	39.55	0.13161		GO:1902493
GO:0032101	regulation of response to external stimulus	367	15	8.82	0.06253		GO:0005776	autophagic vacuole	23	0	0.58	0.78784		GO:0022884	macromolecule transmembrane transporter activity	78	2	1.86	0.71023		GO:0051274	beta-glucan biosynthetic process	217	42	15.07	0.05491		GO:0070069	cytochrome complex	48	1	3.34	0.1265		GO:0047987	hydroperoxide dehydratase activity	17	7	1.23	0.00701		GO:0010228	vegetative to reproductive phase transition of meristem	492	45	33.79	0.49909		GO:0044291
GO:0002218	activation of innate immune response	114	15	2.74	0.11413		GO:0005778	peroxisomal membrane	79	0	1.98	0.08017		GO:0030695	GTPase regulator activity	203	2	4.85	0.85184		GO:0045595	regulation of cell differentiation	493	42	34.23	0.61539		GO:0036064	ciliary basal body	17	1	1.18	0.12789		GO:0048029	monosaccharide binding	107	7	7.74	0.67552		GO:0032504	multicellular organism reproduction	486	45	33.37	0.6066		GO:0031430
GO:1901421	positive regulation of response to alcohol	176	15	4.23	0.11636		GO:0005779	integral component of peroxisomal membrane	27	0	0.68	0.77939		GO:0031559	oxidosqualene cyclase activity	60	2	1.43	0.85831		GO:0045088	regulation of innate immune response	329	42	22.84	0.01861		GO:0016528	sarcoplasm	17	1	1.18	0.13902		GO:0051539	4 iron, 4 sulfur cluster binding	128	7	9.26	0.74725		GO:0048507	meristem development	594	45	40.79	0.67277		GO:0030665
GO:0016036	cellular response to phosphate starvation	151	15	3.63	0.12177		GO:0005782	peroxisomal matrix	23	0	0.58	0.34119		GO:0033218	amide binding	165	2	3.94	0.84824		GO:0044092	negative regulation of molecular function	524	42	36.38	0.44028		GO:0016529	sarcoplasmic reticulum	17	1	1.18	0.13902		GO:0070279	vitamin B6 binding	36	7	2.6	0.25163		GO:0010260	organ senescence	322	45	22.11	1		GO:0045261
GO:0002253	activation of immune response	116	15	2.79	0.14764		GO:0005784	Sec61 translocon complex	16	0	0.4	0.35553		GO:0034061	DNA polymerase activity	202	2	4.83	0.99458		GO:0031329	regulation of cellular catabolic process	511	42	35.48	0.68945		GO:0000242	pericentriolar material	4	1	0.28	0.1425		GO:0070628	proteasome binding	20	7	1.45	0.00647		GO:0048868	pollen tube development	330	44	22.66	0.14573		GO:0030125
GO:0009845	seed germination	423	15	10.16	0.28304		GO:0005785	signal recognition particle receptor complex	34	0	0.85	0.96451		GO:0035250	UDP-galactosyltransferase activity	48	2	1.15	0.88549		GO:0009736	cytokinin-activated signaling pathway	189	42	13.12	0.0038		GO:0031429	box H/ACA snoRNP complex	15	1	1.04	0.14256		GO:2001070	starch binding	33	7	2.39	0.01347		GO:0051093	negative regulation of developmental process	545	44	37.42	0.45496		GO:0030118
GO:0006633	fatty acid biosynthetic process	417	15	10.02	0.35571		GO:0005786	signal recognition particle, endoplasmic reticulum targeting	44	0	1.1	0.94647		GO:0035671	enone reductase activity	14	2	0.33	0.09635		GO:0009644	response to high light intensity	246	42	17.08	0.00083		GO:0072588	box H/ACA RNP complex	15	1	1.04	0.14256		GO:0000155	phosphorelay sensor kinase activity	58	6	4.2	0.3448		GO:0071482	cellular response to light stimulus	240	44	16.48	0.5564		GO:0045259
GO:0033013	tetrapyrrole metabolic process	282	15	6.77	0.37444		GO:0005787	signal peptidase complex	28	0	0.7	0.60616		GO:0036459	ubiquitinyl hydrolase activity	293	2	7	0.6904		GO:0000272	polysaccharide catabolic process	327	42	22.7	0.09029		GO:0010168	ER body	1	1	0.07	0.14766		GO:0000175	3'-5'-exoribonuclease activity	91	6	6.58	0.49248		GO:0019220	regulation of phosphate metabolic process	560	44	38.46	0.71067		GO:0005801
GO:0090351	seedling development	453	15	10.88	0.39476		GO:0005791	rough endoplasmic reticulum	65	0	1.63	0.82857		GO:0042277	peptide binding	140	2	3.35	0.89622		GO:1903047	mitotic cell cycle process	560	41	38.88	0.8631		GO:1990071	TRAPPII protein complex	3	1	0.21	0.15813		GO:0000990	core RNA polymerase binding transcription factor activity	41	6	2.97	0.08559		GO:0051174	regulation of phosphorus metabolic process	560	44	38.46	0.71067		GO:0019897
GO:0042440	pigment metabolic process	447	15	10.74	0.41638		GO:0005793	endoplasmic reticulum-Golgi intermediate compartment	5	0	0.13	0.02601		GO:0042300	beta-amyrin synthase activity	57	2	1.36	0.80532		GO:0072521	purine-containing compound metabolic process	864	41	59.98	0.20115		GO:0005814	centriole	7	1	0.49	0.17881		GO:0001653	peptide receptor activity	55	6	3.98	0.00548		GO:0006886	intracellular protein transport	1365	44	93.73	0.90625		GO:0030140
GO:0008652	cellular amino acid biosynthetic process	702	15	16.86	0.43728		GO:0005795	Golgi stack	92	0	2.31	0.18732		GO:0042910	xenobiotic transporter activity	263	2	6.29	0.28116		GO:0048507	meristem development	594	41	41.24	0.85345		GO:0005685	U1 snRNP	59	1	4.1	0.18095		GO:0004312	fatty acid synthase activity	79	6	5.72	0.04755		GO:0009658	chloroplast organization	471	43	32.34	0.01178		GO:0012510
GO:0042430	indole-containing compound metabolic process	150	15	3.6	0.5078		GO:0005796	Golgi lumen	1	0	0.03	0.9607		GO:0043295	glutathione binding	32	2	0.76	0.63435		GO:0048285	organelle fission	629	41	43.67	0.81533		GO:0005750	mitochondrial respiratory chain complex III	42	1	2.92	0.1991		GO:0004532	exoribonuclease activity	102	6	7.38	0.15501		GO:1901617	organic hydroxy compound biosynthetic process	434	43	29.8	0.06368		GO:0005905
GO:0051188	cofactor biosynthetic process	655	15	15.74	0.57193		GO:0005797	Golgi medial cisterna	5	0	0.13	0.5621		GO:0045159	myosin II binding	38	2	0.91	0.87904		GO:0042594	response to starvation	514	41	35.68	0.87033		GO:0045275	respiratory chain complex III	42	1	2.92	0.1991		GO:0004683	calmodulin-dependent protein kinase activity	64	6	4.63	0.27703		GO:0042546	cell wall biogenesis	390	43	26.78	0.10026		GO:0030132
GO:0006972	hyperosmotic response	132	15	3.17	0.59017		GO:0005801	cis-Golgi network	24	0	0.6	0.06774		GO:0046912	transferase activity, transferring acyl groups, acyl groups converted into alkyl on transfer	39	2	0.93	0.53876		GO:0042445	hormone metabolic process	576	41	39.99	0.208		GO:0000798	nuclear cohesin complex	13	1	0.9	0.20549		GO:0004869	cysteine-type endopeptidase inhibitor activity	244	6	17.65	0.64308		GO:0043623	cellular protein complex assembly	556	43	38.18	0.47296		GO:0030130
GO:1901607	alpha-amino acid biosynthetic process	540	15	12.97	0.62529		GO:0005814	centriole	7	0	0.18	0.47575		GO:0047216	inositol 3-alpha-galactosyltransferase activity	22	2	0.53	0.56293		GO:0034655	nucleobase-containing compound catabolic process	767	41	53.25	0.88356		GO:0008278	cohesin complex	21	1	1.46	0.21408		GO:0005452	inorganic anion exchanger activity	7	6	0.51	0.00017		GO:0006412	translation	1990	43	136.65	0.55545		GO:0098572
GO:0044092	negative regulation of molecular function	524	15	12.59	0.73426		GO:0005816	spindle pole body	3	0	0.08	0.69687		GO:0050734	hydroxycinnamoyltransferase activity	92	2	2.2	0.20424		GO:0009657	plastid organization	584	41	40.54	0.11462		GO:0035452	extrinsic component of plastid membrane	3	1	0.21	0.21911		GO:0008028	monocarboxylic acid transmembrane transporter activity	40	6	2.89	0.1964		GO:0009913	epidermal cell differentiation	512	43	35.16	0.65705		GO:0035371
GO:0071214	cellular response to abiotic stimulus	412	15	9.9	0.87084		GO:0005828	kinetochore microtubule	19	0	0.48	0.02805		GO:0060589	nucleoside-triphosphatase regulator activity	263	2	6.29	0.7722		GO:0080167	response to karrikin	207	40	14.37	5.3e-06		GO:0051285	cell cortex of cell tip	9	1	0.63	0.23735		GO:0008320	protein transmembrane transporter activity	78	6	5.64	0.68811		GO:0034655	nucleobase-containing compound catabolic process	767	43	52.67	0.80926		GO:0008250
GO:1902531	regulation of intracellular signal transduction	260	15	6.25	0.94728		GO:0005832	chaperonin-containing T-complex	15	0	0.38	0.6158		GO:0072341	modified amino acid binding	51	2	1.22	0.38283		GO:0071395	cellular response to jasmonic acid stimulus	333	40	23.12	0.07429		GO:0000943	retrotransposon nucleocapsid	5	1	0.35	0.249		GO:0008883	glutamyl-tRNA reductase activity	18	6	1.3	0.0664		GO:0016482	cytoplasmic transport	1244	43	85.43	0.94209		GO:0033178
GO:0043085	positive regulation of catalytic activity	432	15	10.38	0.96357		GO:0005834	heterotrimeric G-protein complex	10	0	0.25	0.90886		GO:0090430	caffeoyl-CoA: alcohol caffeoyl transferase activity	33	2	0.79	0.001		GO:0051241	negative regulation of multicellular organismal process	397	40	27.56	0.1441		GO:0090576	RNA polymerase III transcription factor complex	21	1	1.46	0.25011		GO:0009884	cytokinin receptor activity	12	6	0.87	0.00295		GO:0009637	response to blue light	190	42	13.05	0.0001		GO:0009921
GO:0051128	regulation of cellular component organization	1201	15	28.85	0.96763		GO:0005835	fatty acid synthase complex	3	0	0.08	0.99237		GO:1900750	oligopeptide binding	32	2	0.76	0.63435		GO:0033043	regulation of organelle organization	742	40	51.51	0.99005		GO:0071007	U2-type catalytic step 2 spliceosome	23	1	1.6	0.2683		GO:0009905	ent-copalyl diphosphate synthase activity	35	6	2.53	0.06856		GO:0051321	meiotic cell cycle	404	42	27.74	0.20105		GO:0009925
GO:1902356	oxaloacetate(2-) transmembrane transport	15	14	0.36	1.2e-11		GO:0005838	proteasome regulatory particle	71	0	1.78	0.43134		GO:1901618	organic hydroxy compound transmembrane transporter activity	25	2	0.6	0.32508		GO:0032504	multicellular organism reproduction	486	40	33.74	0.70048		GO:0031080	nuclear pore outer ring	14	1	0.97	0.27067		GO:0015215	nucleotide transmembrane transporter activity	142	6	10.27	0.18057		GO:0051188	cofactor biosynthetic process	655	42	44.98	0.32919		GO:0034098
GO:0015709	thiosulfate transport	19	14	0.46	3e-09		GO:0005839	proteasome core complex	102	0	2.56	0.77368		GO:0000155	phosphorelay sensor kinase activity	58	1	1.39	0.57474		GO:0010228	vegetative to reproductive phase transition of meristem	492	40	34.16	0.55899		GO:0009538	photosystem I reaction center	23	1	1.6	0.27285		GO:0015298	solute:cation antiporter activity	172	6	12.44	0.11945		GO:1901137	carbohydrate derivative biosynthetic process	1192	42	81.85	0.41648		GO:0036064
GO:1902358	sulfate transmembrane transport	22	14	0.53	5e-08		GO:0005844	polysome	120	0	3.01	0.64445		GO:0000386	second spliceosomal transesterification activity	15	1	0.36	0.8869		GO:0009867	jasmonic acid mediated signaling pathway	313	40	21.73	0.07447		GO:0005746	mitochondrial respiratory chain	147	1	10.22	0.28045		GO:0015299	solute:proton antiporter activity	165	6	11.94	0.13075		GO:0018193	peptidyl-amino acid modification	784	42	53.84	0.66088		GO:0016528
GO:0071422	succinate transmembrane transport	22	14	0.53	5e-08		GO:0005845	mRNA cap binding complex	3	0	0.08	0.60184		GO:0000977	RNA polymerase II regulatory region sequence-specific DNA binding	337	1	8.06	0.00186		GO:0009664	plant-type cell wall organization	362	40	25.13	0.01216		GO:0030897	HOPS complex	21	1	1.46	0.28249		GO:0015301	anion:anion antiporter activity	53	6	3.83	0.56204		GO:0048609	multicellular organismal reproductive process	433	42	29.73	0.75657		GO:0016529
GO:0035435	phosphate ion transmembrane transport	34	14	0.82	2.8e-06		GO:0005846	nuclear cap binding complex	12	0	0.3	0.77093		GO:0001012	RNA polymerase II regulatory region DNA binding	337	1	8.06	1		GO:0009267	cellular response to starvation	419	40	29.09	0.29431		GO:0005852	eukaryotic translation initiation factor 3 complex	61	1	4.24	0.30379		GO:0015605	organophosphate ester transmembrane transporter activity	144	6	10.42	0.15559		GO:0055080	cation homeostasis	498	41	34.2	0.03401		GO:0031429
GO:0046685	response to arsenic-containing substance	43	14	1.03	0.00014		GO:0005847	mRNA cleavage and polyadenylation specificity factor complex	23	0	0.58	0.09519		GO:0001085	RNA polymerase II transcription factor binding	87	1	2.08	0.00774		GO:0007166	cell surface receptor signaling pathway	600	40	41.66	0.53569		GO:0009368	endopeptidase Clp complex	16	1	1.11	0.3143		GO:0016168	chlorophyll binding	71	6	5.14	0.1561		GO:0009793	embryo development ending in seed dormancy	1010	41	69.36	0.13341		GO:0072588
GO:0071423	malate transmembrane transport	47	14	1.13	0.00015		GO:0005849	mRNA cleavage factor complex	64	0	1.6	0.02843		GO:0001228	RNA polymerase II transcription regulatory region sequence-specific DNA binding transcription factor activity involved in positive regulation of transcription	114	1	2.73	0.10025		GO:0097237	cellular response to toxic substance	279	39	19.37	0.00838		GO:0009840	chloroplastic endopeptidase Clp complex	16	1	1.11	0.3143		GO:0016628	oxidoreductase activity, acting on the CH-CH group of donors, NAD or NADP as acceptor	83	6	6	0.3247		GO:0007166	cell surface receptor signaling pathway	600	41	41.2	0.42918		GO:0000242
GO:0010411	xyloglucan metabolic process	77	14	1.85	0.01118		GO:0005850	eukaryotic translation initiation factor 2 complex	10	0	0.25	0.7024		GO:0001665	alpha-N-acetylgalactosaminide alpha-2,6-sialyltransferase activity	7	1	0.17	0.00601		GO:0090407	organophosphate biosynthetic process	1001	39	69.49	0.78771		GO:0044450	microtubule organizing center part	28	1	1.95	0.3145		GO:0016661	oxidoreductase activity, acting on other nitrogenous compounds as donors	13	6	0.94	0.32346		GO:0019693	ribose phosphate metabolic process	736	41	50.54	0.47215		GO:0010168
GO:2000070	regulation of response to water deprivation	109	14	2.62	0.08999		GO:0005851	eukaryotic translation initiation factor 2B complex	16	0	0.4	0.98819		GO:0003678	DNA helicase activity	225	1	5.38	0.99943		GO:0055080	cation homeostasis	498	39	34.57	0.08054		GO:0000126	transcription factor TFIIIB complex	18	1	1.25	0.33748		GO:0016703	oxidoreductase activity, acting on single donors with incorporation of molecular oxygen, incorporation of one atom of oxygen (internal monooxygenases or internal mixed function oxidases)	19	6	1.37	0.07699		GO:0006397	mRNA processing	1022	41	70.18	0.55843		GO:0005814
GO:0010410	hemicellulose metabolic process	151	14	3.63	0.14128		GO:0005852	eukaryotic translation initiation factor 3 complex	61	0	1.53	0.28314		GO:0003684	damaged DNA binding	97	1	2.32	0.22271		GO:0051726	regulation of cell cycle	756	39	52.49	0.99602		GO:0042807	central vacuole	20	1	1.39	0.34292		GO:0016842	amidine-lyase activity	27	6	1.95	0.15745		GO:0090407	organophosphate biosynthetic process	1001	41	68.74	0.63784		GO:0009544
GO:0034284	response to monosaccharide	170	14	4.08	0.33302		GO:0005854	nascent polypeptide-associated complex	3	0	0.08	0.23263		GO:0003697	single-stranded DNA binding	216	1	5.16	0.91879		GO:0009116	nucleoside metabolic process	730	39	50.68	0.59159		GO:0070652	HAUS complex	30	1	2.09	0.38898		GO:0016896	exoribonuclease activity, producing 5'-phosphomonoesters	98	6	7.09	0.2477		GO:0006066	alcohol metabolic process	503	40	34.54	0.04848		GO:0008278
GO:0015740	C4-dicarboxylate transport	105	14	2.52	0.3469		GO:0005859	muscle myosin complex	2	0	0.05	0.23849		GO:0003727	single-stranded RNA binding	180	1	4.3	0.03701		GO:0048646	anatomical structure formation involved in morphogenesis	578	38	40.13	0.27384		GO:0000118	histone deacetylase complex	56	1	3.89	0.40084		GO:0022884	macromolecule transmembrane transporter activity	78	6	5.64	0.68811		GO:0002682	regulation of immune system process	457	40	31.38	0.05417		GO:0016469
GO:0015743	malate transport	101	14	2.43	0.39791		GO:0005865	striated muscle thin filament	2	0	0.05	0.23849		GO:0003746	translation elongation factor activity	102	1	2.44	0.80142		GO:0046165	alcohol biosynthetic process	297	38	20.62	0.02788		GO:0043564	Ku70:Ku80 complex	2	1	0.14	0.40478		GO:0030544	Hsp70 protein binding	36	6	2.6	0.37798		GO:0019684	photosynthesis, light reaction	275	40	18.88	0.06333		GO:0051285
GO:0019637	organophosphate metabolic process	1832	14	44.01	0.41879		GO:0005868	cytoplasmic dynein complex	11	0	0.28	0.98766		GO:0003756	protein disulfide isomerase activity	79	1	1.89	0.69224		GO:0043900	regulation of multi-organism process	486	38	33.74	0.16133		GO:0033268	node of Ranvier	6	1	0.42	0.42819		GO:0030628	pre-mRNA 3'-splice site binding	35	6	2.53	0.37127		GO:1903046	meiotic cell cycle process	350	40	24.03	0.22888		GO:0000943
GO:0072348	sulfur compound transport	44	14	1.06	0.49575		GO:0005872	minus-end kinesin complex	5	0	0.13	0.93599		GO:0003774	motor activity	341	1	8.15	0.8718		GO:0010087	phloem or xylem histogenesis	237	38	16.45	0.00649		GO:0043194	axon initial segment	6	1	0.42	0.42819		GO:0036002	pre-mRNA binding	76	6	5.5	0.34191		GO:0006163	purine nucleotide metabolic process	718	40	49.3	0.26194		GO:0000798
GO:0006839	mitochondrial transport	271	14	6.51	0.54397		GO:0005873	plus-end kinesin complex	7	0	0.18	0.99383		GO:0003777	microtubule motor activity	269	1	6.43	0.61679		GO:0010015	root morphogenesis	540	38	37.49	0.52476		GO:0032421	stereocilium bundle	56	1	3.89	0.46358		GO:0042393	histone binding	170	6	12.3	0.47282		GO:0009150	purine ribonucleotide metabolic process	655	40	44.98	0.36698		GO:0005852
GO:0045595	regulation of cell differentiation	493	14	11.84	0.58952		GO:0005879	axonemal microtubule	4	0	0.1	0.55928		GO:0003878	ATP citrate synthase activity	12	1	0.29	0.39482		GO:0009743	response to carbohydrate	326	38	22.63	0.17023		GO:0014731	spectrin-associated cytoskeleton	10	1	0.7	0.4899		GO:0000996	core DNA-dependent RNA polymerase binding promoter specificity activity	19	5	1.37	0.06518		GO:0009411	response to UV	250	40	17.17	0.50748		GO:0005880
GO:0043086	negative regulation of catalytic activity	468	14	11.24	0.60963		GO:0005880	nuclear microtubule	4	0	0.1	0.36748		GO:0003887	DNA-directed DNA polymerase activity	86	1	2.06	0.35463		GO:0009698	phenylpropanoid metabolic process	372	38	25.83	0.21331		GO:0044304	main axon	10	1	0.7	0.4899		GO:0003713	transcription coactivator activity	93	5	6.73	0.19019		GO:0009259	ribonucleotide metabolic process	702	40	48.21	0.51554		GO:0044450
GO:0071241	cellular response to inorganic substance	227	14	5.45	0.66431		GO:0005881	cytoplasmic microtubule	62	0	1.55	0.77523		GO:0003964	RNA-directed DNA polymerase activity	121	1	2.89	0.99998		GO:0006873	cellular ion homeostasis	408	38	28.33	0.00262		GO:0005930	axoneme	33	1	2.3	0.54286		GO:0003839	gamma-glutamylcyclotransferase activity	10	5	0.72	0.00947		GO:0043085	positive regulation of catalytic activity	432	40	29.67	0.72381		GO:0032421
GO:0006835	dicarboxylic acid transport	110	14	2.64	0.66869		GO:0005884	actin filament	30	0	0.75	0.76226		GO:0004029	aldehyde dehydrogenase (NAD) activity	28	1	0.67	0.72991		GO:1901699	cellular response to nitrogen compound	321	37	22.29	0.28747		GO:0097014	ciliary cytoplasm	33	1	2.3	0.54286		GO:0003844	1,4-alpha-glucan branching enzyme activity	15	5	1.09	0.00084		GO:0048573	photoperiodism, flowering	331	39	22.73	0.17969		GO:0090568
GO:0040008	regulation of growth	551	14	13.24	0.77476		GO:0005885	Arp2/3 protein complex	27	0	0.68	0.6181		GO:0004033	aldo-keto reductase (NADP) activity	20	1	0.48	0.76342		GO:0043623	cellular protein complex assembly	556	37	38.6	0.48024		GO:0000243	commitment complex	38	1	2.64	0.54687		GO:0003872	6-phosphofructokinase activity	36	5	2.6	0.20302		GO:0055082	cellular chemical homeostasis	459	39	31.52	0.20723		GO:1990023
GO:0016052	carbohydrate catabolic process	660	14	15.86	0.78215		GO:0005901	caveola	18	0	0.45	0.45577		GO:0004121	cystathionine beta-lyase activity	8	1	0.19	0.19433		GO:0019693	ribose phosphate metabolic process	736	37	51.1	0.29189		GO:0016593	Cdc73/Paf1 complex	19	1	1.32	0.55189		GO:0003913	DNA photolyase activity	9	5	0.65	0.00421		GO:0044550	secondary metabolite biosynthetic process	457	39	31.38	0.23737		GO:0042807
GO:0006457	protein folding	571	14	13.72	0.78389		GO:0005905	coated pit	52	0	1.3	0.05996		GO:0004168	dolichol kinase activity	4	1	0.1	0.6544		GO:0009909	regulation of flower development	431	37	29.92	0.04695		GO:0030173	integral component of Golgi membrane	38	1	2.64	0.5867		GO:0003964	RNA-directed DNA polymerase activity	121	5	8.75	0.99998		GO:0009648	photoperiodism	348	39	23.9	0.24197		GO:0031011
GO:0000165	MAPK cascade	102	14	2.45	0.80756		GO:0005912	adherens junction	6	0	0.15	0.82812		GO:0004180	carboxypeptidase activity	171	1	4.09	0.00909		GO:0009259	ribonucleotide metabolic process	702	37	48.74	0.33351		GO:0031228	intrinsic component of Golgi membrane	38	1	2.64	0.5867		GO:0004003	ATP-dependent DNA helicase activity	63	5	4.56	0.37288		GO:0090305	nucleic acid phosphodiester bond hydrolysis	1981	39	136.03	0.28657		GO:0070652
GO:0008272	sulfate transport	31	14	0.74	0.80957		GO:0005913	cell-cell adherens junction	1	0	0.03	0.17857		GO:0004185	serine-type carboxypeptidase activity	150	1	3.59	0.01956		GO:0008202	steroid metabolic process	265	37	18.4	0.12137		GO:0000176	nuclear exosome (RNase complex)	33	1	2.3	0.59803		GO:0004012	phospholipid-translocating ATPase activity	37	5	2.68	0.31892		GO:0007389	pattern specification process	504	39	34.61	0.33898		GO:0070451
GO:0015729	oxaloacetate transport	19	14	0.46	0.91042		GO:0005915	zonula adherens	1	0	0.03	0.17857		GO:0004372	glycine hydroxymethyltransferase activity	34	1	0.81	0.24226		GO:0072593	reactive oxygen species metabolic process	420	36	29.16	0.48105		GO:0031257	cell trailing edge membrane	5	1	0.35	0.61201		GO:0004620	phospholipase activity	124	5	8.97	0.52701		GO:0034599	cellular response to oxidative stress	423	39	29.05	0.37818		GO:0000118
GO:0098661	inorganic anion transmembrane transport	68	14	1.63	0.96997		GO:0005918	septate junction	3	0	0.08	0.8095		GO:0004402	histone acetyltransferase activity	79	1	1.89	0.07323		GO:0055065	metal ion homeostasis	446	36	30.96	0.0097		GO:0022625	cytosolic large ribosomal subunit	178	1	12.38	0.61846		GO:0004709	MAP kinase kinase kinase activity	34	5	2.46	0.16894		GO:0032879	regulation of localization	781	39	53.63	0.44444		GO:0019774
GO:0023014	signal transduction by phosphorylation	150	14	3.6	0.99585		GO:0005923	tight junction	3	0	0.08	0.8095		GO:0004421	hydroxymethylglutaryl-CoA synthase activity	4	1	0.1	0.62546		GO:0051188	cofactor biosynthetic process	655	36	45.47	0.33979		GO:0031514	motile cilium	22	1	1.53	0.62194		GO:0004751	ribose-5-phosphate isomerase activity	19	5	1.37	0.14336		GO:0009119	ribonucleoside metabolic process	648	39	44.5	0.74978		GO:0033268
GO:0006259	DNA metabolic process	2393	14	57.49	0.99996		GO:0005933	cellular bud	2	0	0.05	0.81461		GO:0004462	lactoylglutathione lyase activity	28	1	0.67	0.57069		GO:0048638	regulation of developmental growth	343	36	23.81	0.53811		GO:0070274	RES complex	3	1	0.21	0.62205		GO:0004812	aminoacyl-tRNA ligase activity	271	5	19.61	0.23504		GO:0042278	purine nucleoside metabolic process	607	39	41.68	0.79009		GO:0043194
GO:0015744	succinate transport	22	14	0.53	1		GO:0005934	cellular bud tip	2	0	0.05	0.81461		GO:0004525	ribonuclease III activity	79	1	1.89	0.10705		GO:0044272	sulfur compound biosynthetic process	322	36	22.35	0.53487		GO:0015934	large ribosomal subunit	238	1	16.55	0.62515		GO:0005381	iron ion transmembrane transporter activity	18	5	1.3	0.21627		GO:0009886	post-embryonic morphogenesis	422	38	28.98	0.55306		GO:0000439
GO:0055076	transition metal ion homeostasis	252	13	6.05	0.0112		GO:0005935	cellular bud neck	2	0	0.05	0.81461		GO:0004527	exonuclease activity	393	1	9.39	0.60846		GO:0043086	negative regulation of catalytic activity	468	36	32.49	0.31585		GO:0035327	transcriptionally active chromatin	41	1	2.85	0.63042		GO:0005548	phospholipid transporter activity	49	5	3.54	0.12746		GO:0006310	DNA recombination	527	38	36.19	0.87718		GO:1902555
GO:0046916	cellular transition metal ion homeostasis	191	13	4.59	0.01452		GO:0005937	mating projection	6	0	0.15	0.54053		GO:0004529	exodeoxyribonuclease activity	25	1	0.6	0.58447		GO:0016311	dephosphorylation	546	36	37.91	0.41982		GO:0071011	precatalytic spliceosome	60	1	4.17	0.63652		GO:0008378	galactosyltransferase activity	94	5	6.8	0.90551		GO:1901136	carbohydrate derivative catabolic process	307	38	21.08	0.89899		GO:0009538
GO:2000280	regulation of root development	223	13	5.36	0.0224		GO:0005942	phosphatidylinositol 3-kinase complex	10	0	0.25	0.67532		GO:0004536	deoxyribonuclease activity	124	1	2.96	0.98878		GO:0009658	chloroplast organization	471	36	32.7	0.01289		GO:0045171	intercellular bridge	8	1	0.56	0.66003		GO:0008443	phosphofructokinase activity	40	5	2.89	0.40101		GO:0051274	beta-glucan biosynthetic process	217	37	14.9	0.00549		GO:0014731
GO:0009914	hormone transport	368	13	8.84	0.15937		GO:0005947	mitochondrial alpha-ketoglutarate dehydrogenase complex	2	0	0.05	0.65037		GO:0004566	beta-glucuronidase activity	2	1	0.05	0.39666		GO:0009404	toxin metabolic process	89	36	6.18	0.21627		GO:0036126	sperm flagellum	18	1	1.25	0.67805		GO:0010329	auxin efflux transmembrane transporter activity	44	5	3.18	0.06628		GO:0007623	circadian rhythm	263	37	18.06	0.01753		GO:0044304
GO:1990267	response to transition metal nanoparticle	164	13	3.94	0.16367		GO:0005950	anthranilate synthase complex	5	0	0.13	0.23742		GO:0004656	procollagen-proline 4-dioxygenase activity	8	1	0.19	0.37342		GO:0009150	purine ribonucleotide metabolic process	655	36	45.47	0.26311		GO:0097224	sperm connecting piece	18	1	1.25	0.67805		GO:0010436	carotenoid dioxygenase activity	11	5	0.8	1		GO:0048511	rhythmic process	270	37	18.54	0.02177		GO:0097346
GO:0048646	anatomical structure formation involved in morphogenesis	578	13	13.89	0.1901		GO:0005951	carbamoyl-phosphate synthase complex	1	0	0.03	0.9374		GO:0004673	protein histidine kinase activity	66	1	1.58	0.61072		GO:0006928	cellular component movement	496	36	34.43	0.85135		GO:0048471	perinuclear region of cytoplasm	95	1	6.61	0.68437		GO:0015085	calcium ion transmembrane transporter activity	195	5	14.11	0.62593		GO:0006873	cellular ion homeostasis	408	37	28.02	0.11886		GO:0044297
GO:0042545	cell wall modification	378	13	9.08	0.31352		GO:0005953	CAAX-protein geranylgeranyltransferase complex	4	0	0.1	0.55229		GO:0004751	ribose-5-phosphate isomerase activity	19	1	0.45	0.62297		GO:0006163	purine nucleotide metabolic process	718	36	49.85	0.17233		GO:0042721	mitochondrial inner membrane protein insertion complex	16	1	1.11	0.69285		GO:0015450	P-P-bond-hydrolysis-driven protein transmembrane transporter activity	42	5	3.04	0.82304		GO:0098655	cation transmembrane transport	700	37	48.07	0.12503		GO:0005655
GO:0009642	response to light intensity	349	13	8.38	0.3298		GO:0005955	calcineurin complex	1	0	0.03	0.34298		GO:0004798	thymidylate kinase activity	8	1	0.19	0.61003		GO:0010026	trichome differentiation	292	35	20.27	0.11821		GO:0005885	Arp2/3 protein complex	27	1	1.88	0.69685		GO:0015562	efflux transmembrane transporter activity	58	5	4.2	0.03702		GO:0048638	regulation of developmental growth	343	37	23.55	0.48057		GO:0030681
GO:0032504	multicellular organism reproduction	486	13	11.68	0.41265		GO:0005956	protein kinase CK2 complex	12	0	0.3	0.23499		GO:0004838	L-tyrosine:2-oxoglutarate aminotransferase activity	10	1	0.24	0.3011		GO:0008380	RNA splicing	828	35	57.48	0.2167		GO:0015935	small ribosomal subunit	156	1	10.85	0.71602		GO:0015662	ATPase activity, coupled to transmembrane movement of ions, phosphorylative mechanism	109	5	7.89	0.8835		GO:0009932	cell tip growth	307	37	21.08	0.78008		GO:0005930
GO:0042325	regulation of phosphorylation	296	13	7.11	0.46745		GO:0005960	glycine cleavage complex	11	0	0.28	0.1259		GO:0004846	urate oxidase activity	4	1	0.1	0.1177		GO:0006631	fatty acid metabolic process	608	35	42.21	0.69326		GO:0009341	beta-galactosidase complex	4	1	0.28	0.71808		GO:0016229	steroid dehydrogenase activity	52	5	3.76	0.41987		GO:0010224	response to UV-B	157	36	10.78	0.00028		GO:0097014
GO:0042180	cellular ketone metabolic process	347	13	8.34	0.61695		GO:0005965	protein farnesyltransferase complex	4	0	0.1	0.14235		GO:0004930	G-protein coupled receptor activity	9	1	0.22	0.66518		GO:0048609	multicellular organismal reproductive process	433	34	30.06	0.85554		GO:1902911	protein kinase complex	52	1	3.62	0.72934		GO:0016742	hydroxymethyl-, formyl- and related transferase activity	56	5	4.05	0.25382		GO:0022604	regulation of cell morphogenesis	242	36	16.62	0.04063		GO:0000176
GO:1901136	carbohydrate derivative catabolic process	307	13	7.38	0.63412		GO:0005968	Rab-protein geranylgeranyltransferase complex	20	0	0.5	0.04804		GO:0005034	osmosensor activity	56	1	1.34	0.33142		GO:0048573	photoperiodism, flowering	331	34	22.98	0.29759		GO:0000109	nucleotide-excision repair complex	32	1	2.23	0.73258		GO:0016755	transferase activity, transferring amino-acyl groups	31	5	2.24	0.06781		GO:0010393	galacturonan metabolic process	273	36	18.75	0.09386		GO:0070603
GO:0000904	cell morphogenesis involved in differentiation	585	13	14.05	0.72882		GO:0005971	ribonucleoside-diphosphate reductase complex	3	0	0.08	0.12858		GO:0005200	structural constituent of cytoskeleton	106	1	2.53	0.03003		GO:0043085	positive regulation of catalytic activity	432	34	29.99	0.90083		GO:0097060	synaptic membrane	20	1	1.39	0.7397		GO:0016783	sulfurtransferase activity	42	5	3.04	0.76091		GO:0055065	metal ion homeostasis	446	36	30.63	0.25181		GO:0000418
GO:0051726	regulation of cell cycle	756	13	18.16	0.88638		GO:0008021	synaptic vesicle	17	0	0.43	0.61738		GO:0005217	intracellular ligand-gated ion channel activity	56	1	1.34	0.33142		GO:0030243	cellulose metabolic process	222	34	15.41	0.02867		GO:0005844	polysome	120	1	8.35	0.7495		GO:0016868	intramolecular transferase activity, phosphotransferases	47	5	3.4	0.38135		GO:0009743	response to carbohydrate	326	36	22.39	0.27424		GO:0097255
GO:0031399	regulation of protein modification process	549	13	13.19	0.98204		GO:0008023	transcription elongation factor complex	69	0	1.73	0.18259		GO:0005244	voltage-gated ion channel activity	191	1	4.57	0.57865		GO:0019760	glucosinolate metabolic process	196	34	13.61	0.05884		GO:0045211	postsynaptic membrane	19	1	1.32	0.75094		GO:0016875	ligase activity, forming carbon-oxygen bonds	271	5	19.61	0.23504		GO:0098656	anion transmembrane transport	351	36	24.1	0.3037		GO:0031257
GO:0051338	regulation of transferase activity	275	13	6.61	0.99091		GO:0008180	COP9 signalosome	13	0	0.33	0.25233		GO:0005245	voltage-gated calcium channel activity	56	1	1.34	0.33142		GO:0019757	glycosinolate metabolic process	196	34	13.61	0.05884		GO:0000421	autophagic vacuole membrane	6	1	0.42	0.75677		GO:0016876	ligase activity, forming aminoacyl-tRNA and related compounds	271	5	19.61	0.23504		GO:0046128	purine ribonucleoside metabolic process	603	36	41.41	0.79406		GO:0017053
GO:0051247	positive regulation of protein metabolic process	430	13	10.33	0.99226		GO:0008250	oligosaccharyltransferase complex	22	0	0.55	0.05612		GO:0005337	nucleoside transmembrane transporter activity	196	1	4.69	0.10733		GO:0016143	S-glycoside metabolic process	196	34	13.61	0.05884		GO:0044456	synapse part	38	1	2.64	0.75709		GO:0016884	carbon-nitrogen ligase activity, with glutamine as amido-N-donor	65	5	4.7	0.58139		GO:0044092	negative regulation of molecular function	524	36	35.98	0.84671		GO:0031514
GO:0032270	positive regulation of cellular protein metabolic process	427	13	10.26	0.9928		GO:0008274	gamma-tubulin ring complex	9	0	0.23	0.48138		GO:0005451	monovalent cation:proton antiporter activity	38	1	0.91	0.09598		GO:0009648	photoperiodism	348	34	24.16	0.3621		GO:0030008	TRAPP complex	30	1	2.09	0.76252		GO:0016987	sigma factor activity	19	5	1.37	0.06518		GO:0009894	regulation of catabolic process	577	36	39.62	0.92252		GO:0033202
GO:0051347	positive regulation of transferase activity	174	13	4.18	0.99493		GO:0008275	gamma-tubulin small complex	4	0	0.1	0.26608		GO:0008106	alcohol dehydrogenase (NADP+) activity	13	1	0.31	0.6518		GO:0006325	chromatin organization	998	34	69.29	0.99331		GO:1990351	transporter complex	55	1	3.83	0.76561		GO:0019205	nucleobase-containing compound kinase activity	138	5	9.98	0.84446		GO:0010029	regulation of seed germination	212	35	14.56	0.00278		GO:0030677
GO:0048544	recognition of pollen	481	12	11.56	1.2e-13		GO:0008278	cohesin complex	21	0	0.53	0.15451		GO:0008131	primary amine oxidase activity	44	1	1.05	0.19286		GO:0005996	monosaccharide metabolic process	531	34	36.86	0.73792		GO:1902495	transmembrane transporter complex	55	1	3.83	0.76561		GO:0030674	protein binding, bridging	78	5	5.64	0.00543		GO:0001558	regulation of cell growth	248	35	17.03	0.06757		GO:0044391
GO:0045471	response to ethanol	20	12	0.48	1.4e-06		GO:0008287	protein serine/threonine phosphatase complex	75	0	1.88	0.28158		GO:0008134	transcription factor binding	300	1	7.17	0.07278		GO:1902531	regulation of intracellular signal transduction	260	33	18.05	0.14861		GO:0034274	Atg12-Atg5-Atg16 complex	7	1	0.49	0.77116		GO:0035091	phosphatidylinositol binding	184	5	13.31	0.18047		GO:0045488	pectin metabolic process	261	35	17.92	0.08562		GO:0045171
GO:0071456	cellular response to hypoxia	48	12	1.15	0.00039		GO:0008290	F-actin capping protein complex	8	0	0.2	0.76797		GO:0008135	translation factor activity, nucleic acid binding	497	1	11.88	0.60713		GO:0071482	cellular response to light stimulus	240	33	16.66	0.08829		GO:0005765	lysosomal membrane	37	1	2.57	0.77271		GO:0035671	enone reductase activity	14	5	1.01	0.01437		GO:0048528	post-embryonic root development	367	35	25.2	0.21845		GO:0036126
GO:0043406	positive regulation of MAP kinase activity	42	12	1.01	0.00139		GO:0008352	katanin complex	6	0	0.15	0.00456		GO:0008146	sulfotransferase activity	108	1	2.58	0.55545		GO:0071478	cellular response to radiation	269	33	18.68	0.18211		GO:0000782	telomere cap complex	26	1	1.81	0.77917		GO:0045549	9-cis-epoxycarotenoid dioxygenase activity	11	5	0.8	0.00867		GO:0033013	tetrapyrrole metabolic process	282	35	19.36	0.23165		GO:0097224
GO:0046688	response to copper ion	50	12	1.2	0.00783		GO:0008540	proteasome regulatory particle, base subcomplex	32	0	0.8	0.70544		GO:0008170	N-methyltransferase activity	234	1	5.59	0.83406		GO:0071369	cellular response to ethylene stimulus	238	33	16.52	0.85358		GO:0000783	nuclear telomere cap complex	26	1	1.81	0.77917		GO:0046857	oxidoreductase activity, acting on other nitrogenous compounds as donors, with NAD or NADP as acceptor	5	5	0.36	0.02972		GO:0044036	cell wall macromolecule metabolic process	338	35	23.21	0.26101		GO:0015935
GO:0010193	response to ozone	53	12	1.27	0.01257		GO:0008541	proteasome regulatory particle, lid subcomplex	29	0	0.73	0.53425		GO:0008171	O-methyltransferase activity	173	1	4.14	0.3313		GO:0055076	transition metal ion homeostasis	252	33	17.5	0.01943		GO:0022627	cytosolic small ribosomal subunit	83	1	5.77	0.78272		GO:0050897	cobalt ion binding	72	5	5.21	0.67994		GO:0016311	dephosphorylation	546	35	37.49	0.2706		GO:0097060
GO:0009790	embryo development	1174	12	28.2	0.01279		GO:0008623	CHRAC	4	0	0.1	0.15761		GO:0008238	exopeptidase activity	346	1	8.27	0.20104		GO:0051248	negative regulation of protein metabolic process	496	33	34.43	0.45245		GO:0032300	mismatch repair complex	24	1	1.67	0.82433		GO:0080161	auxin transmembrane transporter activity	45	5	3.26	0.11218		GO:0003002	regionalization	380	35	26.09	0.51762		GO:0045211
GO:0071236	cellular response to antibiotic	110	12	2.64	0.02136		GO:0009279	cell outer membrane	8	0	0.2	0.79785		GO:0008276	protein methyltransferase activity	216	1	5.16	0.94896		GO:0048868	pollen tube development	330	33	22.91	0.06549		GO:0000808	origin recognition complex	45	1	3.13	0.83524		GO:0000030	mannosyltransferase activity	48	4	3.47	0.35404		GO:1901607	alpha-amino acid biosynthetic process	540	35	37.08	0.67268		GO:0035267
GO:0009793	embryo development ending in seed dormancy	1010	12	24.26	0.02661		GO:0009295	nucleoid	88	0	2.21	0.12614		GO:0008373	sialyltransferase activity	15	1	0.36	0.77784		GO:0042440	pigment metabolic process	447	33	31.03	0.74909		GO:0005776	autophagic vacuole	23	1	1.6	0.84412		GO:0000295	adenine nucleotide transmembrane transporter activity	117	4	8.46	0.32119		GO:0031329	regulation of cellular catabolic process	511	35	35.09	0.86904		GO:0000782
GO:0043405	regulation of MAP kinase activity	52	12	1.25	0.03187		GO:0009317	acetyl-CoA carboxylase complex	4	0	0.1	0.21853		GO:0008409	5'-3' exonuclease activity	37	1	0.88	0.4591		GO:0032879	regulation of localization	781	33	54.22	0.53419		GO:0000178	exosome (RNase complex)	53	1	3.69	0.86488		GO:0000977	RNA polymerase II regulatory region sequence-specific DNA binding	337	4	24.38	0.00548		GO:1900140	regulation of seedling development	213	35	14.63	0.92922		GO:0000783
GO:0016311	dephosphorylation	546	12	13.12	0.04141		GO:0009326	formate dehydrogenase complex	1	0	0.03	0.28942		GO:0008483	transaminase activity	181	1	4.33	0.72791		GO:0019318	hexose metabolic process	414	33	28.74	0.8206		GO:0043230	extracellular organelle	23	1	1.6	0.8768		GO:0001012	RNA polymerase II regulatory region DNA binding	337	4	24.38	1		GO:0006778	porphyrin-containing compound metabolic process	254	34	17.44	0.11695		GO:0031970
GO:0046165	alcohol biosynthetic process	297	12	7.13	0.06414		GO:0009328	phenylalanine-tRNA ligase complex	3	0	0.08	0.71421		GO:0008536	Ran GTPase binding	69	1	1.65	0.25971		GO:0007018	microtubule-based movement	308	33	21.38	0.23808		GO:0065010	extracellular membrane-bounded organelle	23	1	1.6	0.8768		GO:0002083	4-hydroxybenzoate decaprenyltransferase activity	9	4	0.65	0.05834		GO:0071407	cellular response to organic cyclic compound	513	34	35.23	0.15904		GO:0005758
GO:0043455	regulation of secondary metabolic process	117	12	2.81	0.08131		GO:0009330	DNA topoisomerase complex (ATP-hydrolyzing)	19	0	0.48	0.86122		GO:0008843	endochitinase activity	3	1	0.07	0.5442		GO:0002252	immune effector process	253	33	17.56	0.52741		GO:0070062	extracellular vesicular exosome	23	1	1.6	0.8768		GO:0002094	polyprenyltransferase activity	23	4	1.66	0.06942		GO:0048527	lateral root development	317	34	21.77	0.1819		GO:0016035
GO:0006396	RNA processing	2464	12	59.19	0.0814		GO:0009331	glycerol-3-phosphate dehydrogenase complex	19	0	0.48	0.49148		GO:0009884	cytokinin receptor activity	12	1	0.29	0.63314		GO:0000280	nuclear division	534	33	37.07	0.99983		GO:0001931	uropod	11	1	0.77	0.88218		GO:0003697	single-stranded DNA binding	216	4	15.63	0.97021		GO:0051049	regulation of transport	642	34	44.09	0.41483		GO:0000178
GO:0006066	alcohol metabolic process	503	12	12.08	0.1016		GO:0009341	beta-galactosidase complex	4	0	0.1	0.88834		GO:0010279	indole-3-acetic acid amido synthetase activity	14	1	0.33	0.17476		GO:0000226	microtubule cytoskeleton organization	407	33	28.26	0.52939		GO:0031254	cell trailing edge	11	1	0.77	0.88218		GO:0003725	double-stranded RNA binding	82	4	5.93	0.76809		GO:0030029	actin filament-based process	365	34	25.06	0.44759		GO:0016592
GO:0034614	cellular response to reactive oxygen species	308	12	7.4	0.11713		GO:0009344	nitrite reductase complex [NAD(P)H]	4	0	0.1	0.20652		GO:0010280	UDP-L-rhamnose synthase activity	12	1	0.29	0.76333		GO:0051049	regulation of transport	642	32	44.57	0.46346		GO:0031306	intrinsic component of mitochondrial outer membrane	14	1	0.97	0.88431		GO:0003916	DNA topoisomerase activity	88	4	6.37	0.84825		GO:0048588	developmental cell growth	327	34	22.45	0.61965		GO:0001931
GO:0009308	amine metabolic process	328	12	7.88	0.12698		GO:0009349	riboflavin synthase complex	1	0	0.03	0.37622		GO:0010307	acetylglutamate kinase regulator activity	2	1	0.05	0.37956		GO:0032269	negative regulation of cellular protein metabolic process	470	32	32.63	0.30365		GO:0031307	integral component of mitochondrial outer membrane	14	1	0.97	0.88431		GO:0003917	DNA topoisomerase type I activity	30	4	2.17	0.52827		GO:0071489	cellular response to red or far red light	133	33	9.13	0.00758		GO:0031254
GO:0008202	steroid metabolic process	265	12	6.37	0.14036		GO:0009360	DNA polymerase III complex	2	0	0.05	0.45965		GO:0010333	terpene synthase activity	216	1	5.16	0.25904		GO:0031349	positive regulation of defense response	240	32	16.66	0.04545		GO:0032807	DNA ligase IV complex	6	1	0.42	0.89043		GO:0003933	GTP cyclohydrolase activity	16	4	1.16	0.30337		GO:0016143	S-glycoside metabolic process	196	33	13.46	0.01592		GO:0032807
GO:0031098	stress-activated protein kinase signaling cascade	102	12	2.45	0.14222		GO:0009361	succinate-CoA ligase complex (ADP-forming)	1	0	0.03	0.8541		GO:0015081	sodium ion transmembrane transporter activity	51	1	1.22	0.08923		GO:0000910	cytokinesis	486	32	33.74	0.44923		GO:0000177	cytoplasmic exosome (RNase complex)	38	1	2.64	0.9064		GO:0003935	GTP cyclohydrolase II activity	9	4	0.65	0.067		GO:0019760	glucosinolate metabolic process	196	33	13.46	0.01592		GO:1902562
GO:0007623	circadian rhythm	263	12	6.32	0.16789		GO:0009368	endopeptidase Clp complex	16	0	0.4	0.2536		GO:0015095	magnesium ion transmembrane transporter activity	76	1	1.82	0.01273		GO:0090487	secondary metabolite catabolic process	59	31	4.1	1		GO:0009504	cell plate	67	1	4.66	0.93842		GO:0004020	adenylylsulfate kinase activity	14	4	1.01	0.26049		GO:0019757	glycosinolate metabolic process	196	33	13.46	0.01592		GO:0043189
GO:0048511	rhythmic process	270	12	6.49	0.1781		GO:0009379	Holliday junction helicase complex	4	0	0.1	0.99964		GO:0015137	citrate transmembrane transporter activity	3	1	0.07	0.56112		GO:0071365	cellular response to auxin stimulus	396	31	27.49	0.07869		GO:0048500	signal recognition particle	51	1	3.55	0.94353		GO:0004033	aldo-keto reductase (NADP) activity	20	4	1.45	0.47727		GO:0071365	cellular response to auxin stimulus	396	33	27.19	0.05966		GO:0000177
GO:0045859	regulation of protein kinase activity	209	12	5.02	0.24025		GO:0009380	excinuclease repair complex	1	0	0.03	0.69041		GO:0015142	tricarboxylic acid transmembrane transporter activity	17	1	0.41	0.17515		GO:0071241	cellular response to inorganic substance	227	31	15.76	0.6604		GO:0042765	GPI-anchor transamidase complex	31	1	2.16	0.94924		GO:0004124	cysteine synthase activity	27	4	1.95	0.55886		GO:0009640	photomorphogenesis	148	33	10.16	0.11157		GO:0019773
GO:0034599	cellular response to oxidative stress	423	12	10.16	0.27317		GO:0009501	amyloplast	32	0	0.8	0.09168		GO:0015204	urea transmembrane transporter activity	25	1	0.6	0.1199		GO:0051336	regulation of hydrolase activity	423	31	29.37	0.35631		GO:0005786	signal recognition particle, endoplasmic reticulum targeting	44	1	3.06	0.95101		GO:0004163	diphosphomevalonate decarboxylase activity	8	4	0.58	0.04456		GO:0006644	phospholipid metabolic process	572	33	39.28	0.13789		GO:0016591
GO:0071900	regulation of protein serine/threonine kinase activity	104	12	2.5	0.27873		GO:0009504	cell plate	67	0	1.68	0.81535		GO:0015211	purine nucleoside transmembrane transporter activity	173	1	4.14	0.08523		GO:0048544	recognition of pollen	481	31	33.39	9.8e-12		GO:0005732	small nucleolar ribonucleoprotein complex	65	1	4.52	0.95465		GO:0004351	glutamate decarboxylase activity	10	4	0.72	0.09359		GO:0007126	meiotic nuclear division	310	33	21.29	0.2394		GO:0042765
GO:0043549	regulation of kinase activity	227	12	5.45	0.27938		GO:0009508	plastid chromosome	13	0	0.33	0.18797		GO:0015245	fatty acid transporter activity	25	1	0.6	0.41408		GO:0042446	hormone biosynthetic process	442	31	30.69	0.01455		GO:0048476	Holliday junction resolvase complex	13	1	0.9	0.97763		GO:0004372	glycine hydroxymethyltransferase activity	34	4	2.46	0.20234		GO:0030003	cellular cation homeostasis	383	33	26.3	0.5076		GO:0005732
GO:0071446	cellular response to salicylic acid stimulus	121	12	2.91	0.29758		GO:0009509	chromoplast	6	0	0.15	0.62089		GO:0015278	calcium-release channel activity	56	1	1.34	0.33142		GO:0030003	cellular cation homeostasis	383	31	26.59	0.02304		GO:0005851	eukaryotic translation initiation factor 2B complex	16	1	1.11	0.98402		GO:0004470	malic enzyme activity	26	4	1.88	0.27289		GO:0006631	fatty acid metabolic process	608	33	41.75	0.68485		GO:0005677
GO:0009644	response to high light intensity	246	12	5.91	0.31245		GO:0009513	etioplast	8	0	0.2	0.62499		GO:0015385	sodium:proton antiporter activity	29	1	0.69	0.16743		GO:0015979	photosynthesis	459	31	31.87	0.16316		GO:0010598	NAD(P)H dehydrogenase complex (plastoquinone)	25	1	1.74	0.98868		GO:0004471	malate dehydrogenase (decarboxylating) (NAD+) activity	26	4	1.88	0.27289		GO:0009141	nucleoside triphosphate metabolic process	499	33	34.27	0.9809		GO:0048476
GO:0009863	salicylic acid mediated signaling pathway	116	12	2.79	0.33152		GO:0009514	glyoxysome	27	0	0.68	0.97592		GO:0015491	cation:cation antiporter activity	60	1	1.43	0.06265		GO:0009875	pollen-pistil interaction	492	31	34.16	0.81174		GO:0043601	nuclear replisome	51	1	3.55	0.99657		GO:0004491	methylmalonate-semialdehyde dehydrogenase (acylating) activity	39	4	2.82	0.88993		GO:0045786	negative regulation of cell cycle	288	32	19.78	0.0251		GO:0031304
GO:0071902	positive regulation of protein serine/threonine kinase activity	55	12	1.32	0.37681		GO:0009521	photosystem	191	0	4.79	0.61515		GO:0016157	sucrose synthase activity	48	1	1.15	0.15576		GO:0009734	auxin-activated signaling pathway	349	31	24.23	0.05088		GO:0030894	replisome	51	1	3.55	0.99657		GO:0004499	N,N-dimethylaniline monooxygenase activity	113	4	8.17	0.06551		GO:0032269	negative regulation of cellular protein metabolic process	470	32	32.27	0.04619		GO:0031305
GO:0032147	activation of protein kinase activity	109	12	2.62	0.38709		GO:0009522	photosystem I	95	0	2.38	0.3773		GO:0016278	lysine N-methyltransferase activity	137	1	3.28	0.98115		GO:0009615	response to virus	238	31	16.52	0.19069		GO:0031463	Cul3-RING ubiquitin ligase complex	36	1	2.5	0.99692		GO:0004619	phosphoglycerate mutase activity	16	4	1.16	0.30485		GO:0046165	alcohol biosynthetic process	297	32	20.39	0.06797		GO:0031463
GO:0009311	oligosaccharide metabolic process	298	12	7.16	0.39857		GO:0009523	photosystem II	141	0	3.54	0.70385		GO:0016279	protein-lysine N-methyltransferase activity	137	1	3.28	0.98115		GO:0009451	RNA modification	1882	31	130.66	0.39788		GO:0031672	A band	56	1	3.89	1		GO:0004645	phosphorylase activity	11	4	0.8	0.11829		GO:0051248	negative regulation of protein metabolic process	496	32	34.06	0.08352		GO:0031672
GO:0006778	porphyrin-containing compound metabolic process	254	12	6.1	0.41289		GO:0009527	plastid outer membrane	140	0	3.51	0.90181		GO:0016500	protein-hormone receptor activity	4	1	0.1	0.65704		GO:0009407	toxin catabolic process	59	31	4.1	1.8e-11		GO:0019034	viral replication complex	4	0	0.28	0.00164		GO:0004650	polygalacturonase activity	165	4	11.94	0.63951		GO:0097435	fibril organization	228	32	15.66	0.08856		GO:0019034
GO:0008037	cell recognition	491	12	11.8	0.41478		GO:0009528	plastid inner membrane	114	0	2.86	0.12234		GO:0016661	oxidoreductase activity, acting on other nitrogenous compounds as donors	13	1	0.31	0.64098		GO:0008283	cell proliferation	384	31	26.66	0.36379		GO:0043078	polar nucleus	58	0	4.03	0.00559		GO:0004708	MAP kinase kinase activity	15	4	1.09	0.11415		GO:0043900	regulation of multi-organism process	486	32	33.37	0.09965		GO:0043078
GO:0043408	regulation of MAPK cascade	68	12	1.63	0.4187		GO:0009531	secondary cell wall	68	0	1.71	0.06027		GO:0016663	oxidoreductase activity, acting on other nitrogenous compounds as donors, oxygen as acceptor	4	1	0.1	0.1177		GO:0008037	cell recognition	491	31	34.09	0.45122		GO:0008352	katanin complex	6	0	0.42	0.00729		GO:0004712	protein serine/threonine/tyrosine kinase activity	73	4	5.28	0.65329		GO:0051241	negative regulation of multicellular organismal process	397	32	27.26	0.2127		GO:0008352
GO:0009404	toxin metabolic process	89	12	2.14	0.42215		GO:0009533	chloroplast stromal thylakoid	18	0	0.45	0.28009		GO:0016671	oxidoreductase activity, acting on a sulfur group of donors, disulfide as acceptor	104	1	2.49	0.74012		GO:0006721	terpenoid metabolic process	410	31	28.46	0.47656		GO:0071012	catalytic step 1 spliceosome	10	0	0.7	0.01493		GO:0004779	sulfate adenylyltransferase activity	15	4	1.09	0.02668		GO:0008380	RNA splicing	828	32	56.86	0.26804		GO:0071012
GO:0048437	floral organ development	450	12	10.81	0.4336		GO:0009538	photosystem I reaction center	23	0	0.58	0.36431		GO:0016688	L-ascorbate peroxidase activity	15	1	0.36	0.11958		GO:0006633	fatty acid biosynthetic process	417	31	28.95	0.53039		GO:0071006	U2-type catalytic step 1 spliceosome	10	0	0.7	0.01493		GO:0004781	sulfate adenylyltransferase (ATP) activity	14	4	1.01	0.01554		GO:0051094	positive regulation of developmental process	350	32	24.03	0.30815		GO:0071006
GO:0001932	regulation of protein phosphorylation	249	12	5.98	0.53443		GO:0009539	photosystem II reaction center	2	0	0.05	0.58634		GO:0016742	hydroxymethyl-, formyl- and related transferase activity	56	1	1.34	0.21097		GO:1990267	response to transition metal nanoparticle	164	30	11.39	0.06068		GO:0045261	proton-transporting ATP synthase complex, catalytic core F(1)	70	0	4.87	0.01566		GO:0004792	thiosulfate sulfurtransferase activity	6	4	0.43	0.01243		GO:0009808	lignin metabolic process	190	32	13.05	0.43093		GO:0030121
GO:0030162	regulation of proteolysis	364	12	8.74	0.55444		GO:0009543	chloroplast thylakoid lumen	46	0	1.15	0.9671		GO:0016769	transferase activity, transferring nitrogenous groups	181	1	4.33	0.72791		GO:1901136	carbohydrate derivative catabolic process	307	30	21.31	0.75264		GO:0030121	AP-1 adaptor complex	9	0	0.63	0.02529		GO:0005086	ARF guanyl-nucleotide exchange factor activity	29	4	2.1	0.56388		GO:0009887	organ morphogenesis	492	32	33.79	0.44285		GO:0005652
GO:1902533	positive regulation of intracellular signal transduction	97	12	2.33	0.74679		GO:0009544	chloroplast ATP synthase complex	8	0	0.2	0.13511		GO:0016775	phosphotransferase activity, nitrogenous group as acceptor	66	1	1.58	0.61072		GO:0098655	cation transmembrane transport	700	30	48.6	0.33115		GO:0005652	nuclear lamina	12	0	0.83	0.02631		GO:0005179	hormone activity	16	4	1.16	0.05656		GO:0051240	positive regulation of multicellular organismal process	424	32	29.12	0.6964		GO:0017101
GO:0009875	pollen-pistil interaction	492	12	11.82	0.77699		GO:0009547	plastid ribosome	18	0	0.45	0.56282		GO:0016776	phosphotransferase activity, phosphate group as acceptor	99	1	2.37	0.8153		GO:0061640	cytoskeleton-dependent cytokinesis	462	30	32.07	0.57841		GO:0045259	proton-transporting ATP synthase complex	103	0	7.16	0.03012		GO:0005244	voltage-gated ion channel activity	191	4	13.82	0.65565		GO:0006518	peptide metabolic process	567	32	38.94	0.7024		GO:0005668
GO:0060560	developmental growth involved in morphogenesis	652	12	15.66	0.81125		GO:0009551	secondary plasmodesma	1	0	0.03	0.99914		GO:0016782	transferase activity, transferring sulfur-containing groups	159	1	3.8	0.88022		GO:0050778	positive regulation of immune response	184	30	12.77	0.07388		GO:0017101	aminoacyl-tRNA synthetase multienzyme complex	12	0	0.83	0.03042		GO:0005315	inorganic phosphate transmembrane transporter activity	21	4	1.52	0.11068		GO:0031399	regulation of protein modification process	549	32	37.7	0.98819		GO:0070860
GO:0048507	meristem development	594	12	14.27	0.83032		GO:0009569	chloroplast starch grain	10	0	0.25	0.22459		GO:0016796	exonuclease activity, active with either ribo- or deoxyribonucleic acids and producing 5'-phosphomonoesters	123	1	2.94	0.32946		GO:0048588	developmental cell growth	327	30	22.7	0.24954		GO:0005668	RNA polymerase transcription factor SL1 complex	8	0	0.56	0.03073		GO:0005346	purine ribonucleotide transmembrane transporter activity	117	4	8.46	0.32119		GO:0009860	pollen tube growth	253	31	17.37	0.00203		GO:0030874
GO:0043410	positive regulation of MAPK cascade	50	12	1.2	0.85439		GO:0009574	preprophase band	21	0	0.53	0.06528		GO:0016838	carbon-oxygen lyase activity, acting on phosphates	238	1	5.69	0.32546		GO:0044550	secondary metabolite biosynthetic process	457	30	31.73	0.50162		GO:0070860	RNA polymerase I core factor complex	8	0	0.56	0.03073		GO:0005347	ATP transmembrane transporter activity	111	4	8.03	0.36277		GO:0006875	cellular metal ion homeostasis	357	31	24.52	0.00837		GO:0033116
GO:0033674	positive regulation of kinase activity	148	12	3.56	0.90725		GO:0009654	photosystem II oxygen evolving complex	74	0	1.86	0.60185		GO:0016840	carbon-nitrogen lyase activity	100	1	2.39	0.50221		GO:0044419	interspecies interaction between organisms	249	30	17.29	0.2395		GO:0033116	endoplasmic reticulum-Golgi intermediate compartment membrane	5	0	0.35	0.03562		GO:0005356	hydrogen:glucose symporter activity	4	4	0.29	1		GO:0010087	phloem or xylem histogenesis	237	31	16.27	0.02875		GO:0005793
GO:0071453	cellular response to oxygen levels	52	12	1.25	0.94311		GO:0009706	chloroplast inner membrane	106	0	2.66	0.06817		GO:0016843	amine-lyase activity	47	1	1.12	0.25394		GO:0044403	symbiosis, encompassing mutualism through parasitism	244	30	16.94	0.18631		GO:0005793	endoplasmic reticulum-Golgi intermediate compartment	5	0	0.35	0.03562		GO:0005358	high-affinity hydrogen:glucose symporter activity	4	4	0.29	0.00094		GO:0022900	electron transport chain	254	31	17.44	0.05509		GO:0042763
GO:0036294	cellular response to decreased oxygen levels	52	12	1.25	0.94311		GO:0009707	chloroplast outer membrane	128	0	3.21	0.90985		GO:0016844	strictosidine synthase activity	47	1	1.12	0.25394		GO:0009886	post-embryonic morphogenesis	422	30	29.3	0.60756		GO:0042763	intracellular immature spore	3	0	0.21	0.03654		GO:0005372	water transmembrane transporter activity	46	4	3.33	1		GO:0009909	regulation of flower development	431	31	29.6	0.06074		GO:0042764
GO:0045860	positive regulation of protein kinase activity	133	12	3.2	0.95298		GO:0009840	chloroplastic endopeptidase Clp complex	16	0	0.4	0.2536		GO:0016851	magnesium chelatase activity	11	1	0.26	0.59105		GO:0009873	ethylene-activated signaling pathway	204	30	14.16	0.00035		GO:0042764	ascospore-type prospore	3	0	0.21	0.03654		GO:0005388	calcium-transporting ATPase activity	82	4	5.93	0.75458		GO:0022412	cellular process involved in reproduction in multicellular organism	231	31	15.86	0.06392		GO:0005628
GO:0031401	positive regulation of protein modification process	326	12	7.83	0.99782		GO:0009898	cytoplasmic side of plasma membrane	31	0	0.78	0.57857		GO:0016861	intramolecular oxidoreductase activity, interconverting aldoses and ketoses	76	1	1.82	0.07248		GO:0009119	ribonucleoside metabolic process	648	30	44.99	0.74294		GO:0005628	prospore membrane	3	0	0.21	0.03654		GO:0005534	galactose binding	23	4	1.66	0.06237		GO:0044272	sulfur compound biosynthetic process	322	31	22.11	0.15557		GO:0030891
GO:0045937	positive regulation of phosphate metabolic process	167	12	4.01	0.99946		GO:0009921	auxin efflux carrier complex	3	0	0.08	0.61416		GO:0016864	intramolecular oxidoreductase activity, transposing S-S bonds	79	1	1.89	0.69224		GO:0007389	pattern specification process	504	30	34.99	0.25846		GO:0030891	VCB complex	5	0	0.35	0.03783		GO:0008106	alcohol dehydrogenase (NADP+) activity	13	4	0.94	0.21355		GO:0007276	gamete generation	217	31	14.9	0.18275		GO:0000153
GO:0010562	positive regulation of phosphorus metabolic process	167	12	4.01	0.99946		GO:0009925	basal plasma membrane	3	0	0.08	0.61416		GO:0016895	exodeoxyribonuclease activity, producing 5'-phosphomonoesters	25	1	0.6	0.58447		GO:0006875	cellular metal ion homeostasis	357	30	24.78	0.01819		GO:0000153	cytoplasmic ubiquitin ligase complex	5	0	0.35	0.03783		GO:0008131	primary amine oxidase activity	44	4	3.18	0.15147		GO:0050776	regulation of immune response	382	31	26.23	0.20491		GO:0034719
GO:0042327	positive regulation of phosphorylation	167	12	4.01	0.99946		GO:0010005	cortical microtubule, transverse to long axis	9	0	0.23	0.42072		GO:0017016	Ras GTPase binding	203	1	4.85	0.12374		GO:0002684	positive regulation of immune system process	209	30	14.51	0.12007		GO:0034719	SMN-Sm protein complex	9	0	0.63	0.04007		GO:0008138	protein tyrosine/serine/threonine phosphatase activity	62	4	4.49	0.25721		GO:0051336	regulation of hydrolase activity	423	31	29.05	0.24355		GO:0000407
GO:0001934	positive regulation of protein phosphorylation	156	12	3.75	0.99951		GO:0010006	Toc complex	5	0	0.13	0.0319		GO:0018024	histone-lysine N-methyltransferase activity	114	1	2.73	0.98933		GO:0051240	positive regulation of multicellular organismal process	424	29	29.44	0.70849		GO:0000407	pre-autophagosomal structure	37	0	2.57	0.04073		GO:0008171	O-methyltransferase activity	173	4	12.52	0.35349		GO:0045454	cell redox homeostasis	357	31	24.52	0.39881		GO:0070775
GO:0042744	hydrogen peroxide catabolic process	226	11	5.43	0.0026		GO:0010007	magnesium chelatase complex	6	0	0.15	0.8181		GO:0019201	nucleotide kinase activity	69	1	1.65	0.8133		GO:0048437	floral organ development	450	29	31.24	0.49471		GO:0070775	H3 histone acetyltransferase complex	7	0	0.49	0.04207		GO:0008172	S-methyltransferase activity	13	4	0.94	0.63175		GO:0006633	fatty acid biosynthetic process	417	31	28.64	0.4078		GO:0070776
GO:0010112	regulation of systemic acquired resistance	88	11	2.11	0.01017		GO:0010008	endosome membrane	129	0	3.23	0.96481		GO:0019205	nucleobase-containing compound kinase activity	138	1	3.3	0.82671		GO:0046128	purine ribonucleoside metabolic process	603	29	41.86	0.79591		GO:0070776	MOZ/MORF histone acetyltransferase complex	7	0	0.49	0.04207		GO:0008173	RNA methyltransferase activity	171	4	12.37	0.61574		GO:0009267	cellular response to starvation	419	31	28.77	0.61737		GO:0031205
GO:0042743	hydrogen peroxide metabolic process	265	11	6.37	0.01781		GO:0010009	cytoplasmic side of endosome membrane	2	0	0.05	0.70619		GO:0019534	toxin transporter activity	3	1	0.07	0.56112		GO:0045089	positive regulation of innate immune response	179	29	12.43	0.05152		GO:0031205	endoplasmic reticulum Sec complex	5	0	0.35	0.04231		GO:0008199	ferric iron binding	24	4	1.74	0.15837		GO:0010608	posttranscriptional regulation of gene expression	709	31	48.69	0.84477		GO:0010006
GO:0046348	amino sugar catabolic process	56	11	1.35	0.02583		GO:0010168	ER body	1	0	0.03	0.4111		GO:0019784	NEDD8-specific protease activity	7	1	0.17	0.64713		GO:0042278	purine nucleoside metabolic process	607	29	42.14	0.79203		GO:0010006	Toc complex	5	0	0.35	0.04291		GO:0008234	cysteine-type peptidase activity	548	4	39.65	0.89155		GO:0042594	response to starvation	514	31	35.3	0.8576		GO:0000164
GO:1901072	glucosamine-containing compound catabolic process	56	11	1.35	0.02583		GO:0010170	glucose-1-phosphate adenylyltransferase complex	1	0	0.03	0.28951		GO:0019788	NEDD8 ligase activity	3	1	0.07	0.20241		GO:0019953	sexual reproduction	370	29	25.69	0.67569		GO:0000164	protein phosphatase type 1 complex	10	0	0.7	0.0447		GO:0008661	1-deoxy-D-xylulose-5-phosphate synthase activity	21	4	1.52	0.0355		GO:0005996	monosaccharide metabolic process	531	31	36.46	0.87118		GO:0030131
GO:0006026	aminoglycan catabolic process	56	11	1.35	0.02583		GO:0010287	plastoglobule	120	0	3.01	0.65295		GO:0019798	procollagen-proline dioxygenase activity	8	1	0.19	0.37342		GO:0016265	death	630	29	43.74	0.672		GO:0030131	clathrin adaptor complex	39	0	2.71	0.05015		GO:0008686	3,4-dihydroxy-2-butanone-4-phosphate synthase activity	14	4	1.01	0.23095		GO:0051052	regulation of DNA metabolic process	421	31	28.91	0.98995		GO:0016581
GO:0006030	chitin metabolic process	56	11	1.35	0.02583		GO:0010319	stromule	68	0	1.71	0.97662		GO:0022832	voltage-gated channel activity	191	1	4.57	0.57865		GO:0009914	hormone transport	368	29	25.55	0.2662		GO:0016581	NuRD complex	21	0	1.46	0.05505		GO:0008898	S-adenosylmethionine-homocysteine S-methyltransferase activity	5	4	0.36	0.00291		GO:0055076	transition metal ion homeostasis	252	30	17.3	0.01795		GO:0090545
GO:0006032	chitin catabolic process	56	11	1.35	0.02583		GO:0010330	cellulose synthase complex	8	0	0.2	0.79874		GO:0022839	ion gated channel activity	97	1	2.32	0.46638		GO:0008219	cell death	630	29	43.74	0.672		GO:0090545	CHD-type complex	21	0	1.46	0.05505		GO:0009044	xylan 1,4-beta-xylosidase activity	10	4	0.72	0.05183		GO:0009739	response to gibberellin	241	30	16.55	0.03462		GO:0005687
GO:0006022	aminoglycan metabolic process	57	11	1.37	0.02929		GO:0010369	chromocenter	11	0	0.28	0.86292		GO:0022843	voltage-gated cation channel activity	125	1	2.99	0.42247		GO:0098660	inorganic ion transmembrane transport	714	28	49.57	0.42285		GO:0005687	U4 snRNP	8	0	0.56	0.05729		GO:0009679	hexose:proton symporter activity	4	4	0.29	1		GO:0009734	auxin-activated signaling pathway	349	30	23.97	0.07045		GO:0000789
GO:1901071	glucosamine-containing compound metabolic process	59	11	1.42	0.03378		GO:0010370	perinucleolar chromocenter	4	0	0.1	0.7447		GO:0030276	clathrin binding	127	1	3.04	0.06214		GO:0098656	anion transmembrane transport	351	28	24.37	0.32812		GO:0000789	cytoplasmic chromatin	5	0	0.35	0.06266		GO:0009922	fatty acid elongase activity	16	4	1.16	0.31177		GO:0015994	chlorophyll metabolic process	181	30	12.43	0.10062		GO:0005731
GO:0006040	amino sugar metabolic process	83	11	1.99	0.06015		GO:0010445	nuclear dicing body	11	0	0.28	0.56521		GO:0030628	pre-mRNA 3'-splice site binding	35	1	0.84	0.50765		GO:0051094	positive regulation of developmental process	350	28	24.3	0.53524		GO:0031464	Cul4A-RING E3 ubiquitin ligase complex	5	0	0.35	0.06997		GO:0009931	calcium-dependent protein serine/threonine kinase activity	49	4	3.54	0.24764		GO:0006575	cellular modified amino acid metabolic process	303	30	20.81	0.20884		GO:0031464
GO:0010087	phloem or xylem histogenesis	237	11	5.69	0.23132		GO:0010494	cytoplasmic stress granule	65	0	1.63	0.7209		GO:0030674	protein binding, bridging	78	1	1.86	0.00591		GO:0022604	regulation of cell morphogenesis	242	28	16.8	0.31968		GO:0098556	cytoplasmic side of rough endoplasmic reticulum membrane	4	0	0.28	0.07077		GO:0010857	calcium-dependent protein kinase activity	49	4	3.54	0.24764		GO:0071103	DNA conformation change	356	30	24.45	0.2641		GO:0005968
GO:0070301	cellular response to hydrogen peroxide	243	11	5.84	0.24655		GO:0010598	NAD(P)H dehydrogenase complex (plastoquinone)	25	0	0.63	0.98962		GO:0031267	small GTPase binding	203	1	4.85	0.12374		GO:0017144	drug metabolic process	552	28	38.32	0.66026		GO:0005968	Rab-protein geranylgeranyltransferase complex	20	0	1.39	0.0708		GO:0015081	sodium ion transmembrane transporter activity	51	4	3.69	0.04412		GO:0007346	regulation of mitotic cell cycle	373	30	25.61	0.27657		GO:0098556
GO:0005984	disaccharide metabolic process	190	11	4.56	0.24888		GO:0012507	ER to Golgi transport vesicle membrane	47	0	1.18	0.4198		GO:0031543	peptidyl-proline dioxygenase activity	8	1	0.19	0.37342		GO:0015711	organic anion transport	474	28	32.91	0.55192		GO:0098572	stromal side of plastid thylakoid membrane	4	0	0.28	0.07285		GO:0015093	ferrous iron transmembrane transporter activity	4	4	0.29	0.00052		GO:0044282	small molecule catabolic process	352	30	24.17	0.28512		GO:0031465
GO:0010224	response to UV-B	157	11	3.77	0.27789		GO:0012510	trans-Golgi network transport vesicle membrane	60	0	1.5	0.04517		GO:0031545	peptidyl-proline 4-dioxygenase activity	8	1	0.19	0.37342		GO:0012501	programmed cell death	524	28	36.38	0.6746		GO:0031465	Cul4B-RING E3 ubiquitin ligase complex	9	0	0.63	0.07546		GO:0015105	arsenite transmembrane transporter activity	16	4	1.16	0.10659		GO:0016265	death	630	30	43.26	0.56537		GO:0030122
GO:0009411	response to UV	250	11	6.01	0.33473		GO:0012511	monolayer-surrounded lipid storage body	42	0	1.05	0.066		GO:0032050	clathrin heavy chain binding	35	1	0.84	0.25344		GO:0009887	organ morphogenesis	492	28	34.16	0.40016		GO:0030122	AP-2 adaptor complex	7	0	0.49	0.07789		GO:0015179	L-amino acid transmembrane transporter activity	41	4	2.97	0.28479		GO:0008219	cell death	630	30	43.26	0.56537		GO:0030128
GO:0043933	macromolecular complex subunit organization	1925	11	46.24	0.45995		GO:0014069	postsynaptic density	3	0	0.08	0.98814		GO:0032182	small conjugating protein binding	116	1	2.77	0.66147		GO:0009816	defense response to bacterium, incompatible interaction	129	28	8.96	1e-05		GO:0030128	clathrin coat of endocytic vesicle	7	0	0.49	0.07789		GO:0015216	purine nucleotide transmembrane transporter activity	117	4	8.46	0.32119		GO:0043086	negative regulation of catalytic activity	468	30	32.14	0.79521		GO:0030669
GO:0002252	immune effector process	253	11	6.08	0.53443		GO:0014704	intercalated disc	54	0	1.35	0.00059		GO:0032266	phosphatidylinositol-3-phosphate binding	42	1	1	0.17804		GO:0009640	photomorphogenesis	148	28	10.27	0.48959		GO:0030669	clathrin-coated endocytic vesicle membrane	7	0	0.49	0.07789		GO:0015250	water channel activity	46	4	3.33	0.00559		GO:0040029	regulation of gene expression, epigenetic	623	30	42.78	0.8973		GO:0031207
GO:1901699	cellular response to nitrogen compound	321	11	7.71	0.55356		GO:0014731	spectrin-associated cytoskeleton	10	0	0.25	0.42709		GO:0032296	double-stranded RNA-specific ribonuclease activity	79	1	1.89	0.10705		GO:0009311	oligosaccharide metabolic process	298	28	20.69	0.44664		GO:0031207	Sec62/Sec63 complex	4	0	0.28	0.07965		GO:0016647	oxidoreductase activity, acting on the CH-NH group of donors, oxygen as acceptor	15	4	1.09	0.3297		GO:0016458	gene silencing	648	30	44.5	0.90262		GO:0070847
GO:0034613	cellular protein localization	1703	11	40.91	0.55562		GO:0015934	large ribosomal subunit	238	0	5.97	0.59998		GO:0035312	5'-3' exodeoxyribonuclease activity	14	1	0.33	0.38897		GO:0006310	DNA recombination	527	28	36.59	0.99999		GO:0055087	Ski complex	14	0	0.97	0.08029		GO:0016706	oxidoreductase activity, acting on paired donors, with incorporation or reduction of molecular oxygen, 2-oxoglutarate as one donor, and incorporation of one atom each of oxygen into both donors	76	4	5.5	0.73684		GO:0046274	lignin catabolic process	98	29	6.73	2.6e-05		GO:0055087
GO:0042981	regulation of apoptotic process	178	11	4.28	0.55915		GO:0015935	small ribosomal subunit	156	0	3.91	0.49916		GO:0036002	pre-mRNA binding	76	1	1.82	0.38835		GO:0001558	regulation of cell growth	248	28	17.22	0.35038		GO:0070847	core mediator complex	14	0	0.97	0.08049		GO:0016744	transferase activity, transferring aldehyde or ketonic groups	39	4	2.82	0.41569		GO:1901420	negative regulation of response to alcohol	177	29	12.15	0.0098		GO:0000015
GO:0017144	drug metabolic process	552	11	13.26	0.58022		GO:0016035	zeta DNA polymerase complex	14	0	0.35	0.80119		GO:0036033	mediator complex binding	3	1	0.07	0.24192		GO:0000398	mRNA splicing, via spliceosome	568	28	39.43	0.52394		GO:0035371	microtubule plus-end	9	0	0.63	0.0806		GO:0016776	phosphotransferase activity, phosphate group as acceptor	99	4	7.16	0.85892		GO:0030244	cellulose biosynthetic process	158	29	10.85	0.01044		GO:0016342
GO:0009826	unidimensional cell growth	589	11	14.15	0.58311		GO:0016234	inclusion body	17	0	0.43	0.5165		GO:0042054	histone methyltransferase activity	133	1	3.18	0.86985		GO:0000377	RNA splicing, via transesterification reactions with bulged adenosine as nucleophile	617	28	42.84	0.47471		GO:0070531	BRCA1-A complex	28	0	1.95	0.08209		GO:0016814	hydrolase activity, acting on carbon-nitrogen (but not peptide) bonds, in cyclic amidines	61	4	4.41	0.40931		GO:0046271	phenylpropanoid catabolic process	106	29	7.28	0.01338		GO:0033263
GO:0006915	apoptotic process	201	11	4.83	0.61763		GO:0016235	aggresome	11	0	0.28	0.41057		GO:0042162	telomeric DNA binding	95	1	2.27	0.97801		GO:0000375	RNA splicing, via transesterification reactions	626	28	43.46	0.53387		GO:0000015	phosphopyruvate hydratase complex	13	0	0.9	0.0854		GO:0016899	oxidoreductase activity, acting on the CH-OH group of donors, oxygen as acceptor	42	4	3.04	0.03719		GO:0008202	steroid metabolic process	265	29	18.2	0.10624		GO:0031082
GO:0009639	response to red or far red light	404	11	9.71	0.70174		GO:0016272	prefoldin complex	29	0	0.73	0.93944		GO:0042887	amide transmembrane transporter activity	102	1	2.44	0.93689		GO:2000070	regulation of response to water deprivation	109	27	7.57	0.55681		GO:0008250	oligosaccharyltransferase complex	22	0	1.53	0.08829		GO:0017056	structural constituent of nuclear pore	41	4	2.97	0.66881		GO:0015980	energy derivation by oxidation of organic compounds	344	29	23.62	0.33294		GO:0031083
GO:0060284	regulation of cell development	216	11	5.19	0.8293		GO:0016282	eukaryotic 43S preinitiation complex	37	0	0.93	0.52836		GO:0042895	antibiotic transporter activity	3	1	0.07	0.56112		GO:1901420	negative regulation of response to alcohol	177	27	12.29	0.02466		GO:0016342	catenin complex	7	0	0.49	0.0951		GO:0019136	deoxynucleoside kinase activity	18	4	1.3	0.10613		GO:0007015	actin filament organization	241	29	16.55	0.35657		GO:0012511
GO:0009864	induced systemic resistance, jasmonic acid mediated signaling pathway	39	10	0.94	0.00096		GO:0016323	basolateral plasma membrane	69	0	1.73	0.02427		GO:0043047	single-stranded telomeric DNA binding	46	1	1.1	0.98886		GO:0043455	regulation of secondary metabolic process	117	27	8.12	0.12814		GO:0031082	BLOC complex	7	0	0.49	0.09572		GO:0019139	cytokinin dehydrogenase activity	14	4	1.01	0.06701		GO:0030036	actin cytoskeleton organization	288	29	19.78	0.59454		GO:0005686
GO:0032259	methylation	1198	10	28.78	0.02981		GO:0016327	apicolateral plasma membrane	3	0	0.08	0.8095		GO:0043130	ubiquitin binding	116	1	2.77	0.66147		GO:0033013	tetrapyrrole metabolic process	282	27	19.58	0.70894		GO:0031083	BLOC-1 complex	7	0	0.49	0.09572		GO:0019187	beta-1,4-mannosyltransferase activity	18	4	1.3	0.38039		GO:0046434	organophosphate catabolic process	361	29	24.79	0.74509		GO:0034715
GO:1902584	positive regulation of response to water deprivation	52	10	1.25	0.03583		GO:0016328	lateral plasma membrane	9	0	0.23	0.55963		GO:0043424	protein histidine kinase binding	77	1	1.84	0.6401		GO:0030029	actin filament-based process	365	27	25.34	0.49939		GO:0005801	cis-Golgi network	24	0	1.67	0.10304		GO:0019206	nucleoside kinase activity	43	4	3.11	0.4311		GO:0034605	cellular response to heat	153	28	10.51	0.01667		GO:0030119
GO:0048581	negative regulation of post-embryonic development	255	10	6.13	0.04114		GO:0016342	catenin complex	7	0	0.18	0.0766		GO:0045543	gibberellin 2-beta-dioxygenase activity	13	1	0.31	0.27199		GO:0016441	posttranscriptional gene silencing	236	27	16.38	0.13472		GO:0031965	nuclear membrane	48	0	3.34	0.10696		GO:0019209	kinase activator activity	20	4	1.45	0.11053		GO:0006732	coenzyme metabolic process	762	28	52.33	0.05457		GO:0005753
GO:0002239	response to oomycetes	149	10	3.58	0.05028		GO:0016363	nuclear matrix	29	0	0.73	0.14833		GO:0048029	monosaccharide binding	107	1	2.56	0.86532		GO:0016114	terpenoid biosynthetic process	324	27	22.49	0.8609		GO:0034715	pICln-Sm protein complex	6	0	0.42	0.11099		GO:0019238	cyclohydrolase activity	37	4	2.68	0.22392		GO:0009404	toxin metabolic process	89	28	6.11	0.10594		GO:0032044
GO:0009910	negative regulation of flower development	110	10	2.64	0.05462		GO:0016442	RISC complex	30	0	0.75	0.37631		GO:0048032	galacturonate binding	13	1	0.31	0.28603		GO:0009606	tropism	225	27	15.62	0.06842		GO:0032580	Golgi cisterna membrane	15	0	1.04	0.11312		GO:0022832	voltage-gated channel activity	191	4	13.82	0.65565		GO:0015698	inorganic anion transport	199	28	13.67	0.15981		GO:0005847
GO:0016998	cell wall macromolecule catabolic process	72	10	1.73	0.05711		GO:0016459	myosin complex	57	0	1.43	0.97902		GO:0048038	quinone binding	71	1	1.7	0.18187		GO:0009411	response to UV	250	27	17.36	0.0747		GO:0033178	proton-transporting two-sector ATPase complex, catalytic domain	96	0	6.68	0.11388		GO:0022839	ion gated channel activity	97	4	7.02	0.63322		GO:0051302	regulation of cell division	398	28	27.33	0.20827		GO:0035579
GO:0005992	trehalose biosynthetic process	69	10	1.66	0.09713		GO:0016460	myosin II complex	8	0	0.2	0.82607		GO:0050183	phosphatidylcholine 12-monooxygenase activity	18	1	0.43	0.00084		GO:0006694	steroid biosynthetic process	180	27	12.5	0.16861		GO:0030119	AP-type membrane coat adaptor complex	49	0	3.41	0.12414		GO:0030295	protein kinase activator activity	20	4	1.45	0.11053		GO:0034614	cellular response to reactive oxygen species	308	28	21.15	0.23199		GO:0071541
GO:0009698	phenylpropanoid metabolic process	372	10	8.94	0.10829		GO:0016471	vacuolar proton-transporting V-type ATPase complex	22	0	0.55	0.99301		GO:0050377	UDP-glucose 4,6-dehydratase activity	12	1	0.29	0.76333		GO:0006605	protein targeting	650	27	45.13	0.92157		GO:0005753	mitochondrial proton-transporting ATP synthase complex	52	0	3.62	0.1247		GO:0030732	methionine S-methyltransferase activity	4	4	0.29	0.00081		GO:0042127	regulation of cell proliferation	256	28	17.58	0.23271		GO:0031510
GO:0043902	positive regulation of multi-organism process	109	10	2.62	0.11786		GO:0016514	SWI/SNF complex	23	0	0.58	0.71918		GO:0051002	ligase activity, forming nitrogen-metal bonds	11	1	0.26	0.59105		GO:0070482	response to oxygen levels	188	26	13.05	0.08915		GO:0005847	mRNA cleavage and polyadenylation specificity factor complex	23	0	1.6	0.12928		GO:0032451	demethylase activity	44	4	3.18	0.32138		GO:0009832	plant-type cell wall biogenesis	274	28	18.82	0.24937		GO:0033177
GO:0080167	response to karrikin	207	10	4.97	0.133		GO:0016528	sarcoplasm	17	0	0.43	0.09595		GO:0051003	ligase activity, forming nitrogen-metal bonds, forming coordination complexes	11	1	0.26	0.59105		GO:0043414	macromolecule methylation	580	26	40.27	0.98094		GO:0035579	specific granule membrane	5	0	0.35	0.12966		GO:0032452	histone demethylase activity	38	4	2.75	0.36751		GO:0042545	cell wall modification	378	28	25.96	0.33567		GO:0032585
GO:0009312	oligosaccharide biosynthetic process	115	10	2.76	0.16572		GO:0016529	sarcoplasmic reticulum	17	0	0.43	0.09595		GO:0051010	microtubule plus-end binding	15	1	0.36	0.25214		GO:0036293	response to decreased oxygen levels	183	26	12.7	0.1039		GO:0071541	eukaryotic translation initiation factor 3 complex, eIF3m	16	0	1.11	0.13053		GO:0034212	peptide N-acetyltransferase activity	61	4	4.41	0.12006		GO:0046148	pigment biosynthetic process	372	28	25.55	0.36385		GO:0031261
GO:0005991	trehalose metabolic process	85	10	2.04	0.18286		GO:0016581	NuRD complex	21	0	0.53	0.02248		GO:0051020	GTPase binding	240	1	5.74	0.36815		GO:0035690	cellular response to drug	242	26	16.8	0.02465		GO:0031510	SUMO activating enzyme complex	2	0	0.14	0.13416		GO:0034593	phosphatidylinositol bisphosphate phosphatase activity	28	4	2.03	0.49753		GO:0012501	programmed cell death	524	28	35.98	0.56143		GO:0032299
GO:0033014	tetrapyrrole biosynthetic process	217	10	5.21	0.18549		GO:0016590	ACF complex	4	0	0.1	0.15761		GO:0051536	iron-sulfur cluster binding	380	1	9.08	0.439		GO:0035194	posttranscriptional gene silencing by RNA	214	26	14.86	0.0743		GO:0032585	multivesicular body membrane	4	0	0.28	0.13646		GO:0034595	phosphatidylinositol phosphate 5-phosphatase activity	24	4	1.74	0.54438		GO:0071369	cellular response to ethylene stimulus	238	28	16.34	0.60854		GO:0031515
GO:0046351	disaccharide biosynthetic process	86	10	2.07	0.18869		GO:0016591	DNA-directed RNA polymerase II, holoenzyme	216	0	5.42	0.94185		GO:0051540	metal cluster binding	380	1	9.08	0.439		GO:0034605	cellular response to heat	153	26	10.62	0.03481		GO:0033177	proton-transporting two-sector ATPase complex, proton-transporting domain	70	0	4.87	0.13737		GO:0035250	UDP-galactosyltransferase activity	48	4	3.47	0.8131		GO:0021700	developmental maturation	356	28	24.45	0.6792		GO:0035101
GO:0006732	coenzyme metabolic process	762	10	18.31	0.23534		GO:0016593	Cdc73/Paf1 complex	19	0	0.48	0.4761		GO:0052634	C-19 gibberellin 2-beta-dioxygenase activity	9	1	0.22	0.53951		GO:0034599	cellular response to oxidative stress	423	26	29.37	0.37323		GO:0031261	DNA replication preinitiation complex	15	0	1.04	0.13852		GO:0042389	omega-3 fatty acid desaturase activity	7	4	0.51	0.00134		GO:0006720	isoprenoid metabolic process	556	28	38.18	0.81302		GO:0000214
GO:0046148	pigment biosynthetic process	372	10	8.94	0.42651		GO:0016602	CCAAT-binding factor complex	27	0	0.68	0.41129		GO:0052716	hydroquinone:oxygen oxidoreductase activity	87	1	2.08	0.12809		GO:0030244	cellulose biosynthetic process	158	26	10.97	0.0558		GO:0032299	ribonuclease H2 complex	8	0	0.56	0.14097		GO:0042826	histone deacetylase binding	35	4	2.53	0.01495		GO:0019318	hexose metabolic process	414	28	28.43	0.90317		GO:0005971
GO:0060429	epithelium development	742	10	17.83	0.44347		GO:0016605	PML body	12	0	0.3	0.6649		GO:0060090	binding, bridging	102	1	2.44	0.6136		GO:0030036	actin cytoskeleton organization	288	26	19.99	0.57711		GO:0000307	cyclin-dependent protein kinase holoenzyme complex	23	0	1.6	0.14156		GO:0042887	amide transmembrane transporter activity	102	4	7.38	0.9026		GO:0009199	ribonucleoside triphosphate metabolic process	465	28	31.93	0.90982		GO:0000506
GO:0034605	cellular response to heat	153	10	3.68	0.48083		GO:0016607	nuclear speck	188	0	4.71	0.86626		GO:0070008	serine-type exopeptidase activity	183	1	4.37	0.29777		GO:0016125	sterol metabolic process	163	26	11.32	0.09912		GO:0031515	tRNA (m1A) methyltransferase complex	6	0	0.42	0.14228		GO:0043021	ribonucleoprotein complex binding	194	4	14.03	0.95671		GO:0009144	purine nucleoside triphosphate metabolic process	444	28	30.49	0.9298		GO:0005697
GO:0071822	protein complex subunit organization	1371	10	32.94	0.51109		GO:0017053	transcriptional repressor complex	85	0	2.13	0.35889		GO:0070547	L-tyrosine aminotransferase activity	10	1	0.24	0.3011		GO:0016036	cellular response to phosphate starvation	151	26	10.48	0.02369		GO:0035101	FACT complex	16	0	1.11	0.14805		GO:0043024	ribosomal small subunit binding	11	4	0.8	0.0235		GO:0009205	purine ribonucleoside triphosphate metabolic process	442	28	30.35	0.93057		GO:0033017
GO:2000242	negative regulation of reproductive process	183	10	4.4	0.51991		GO:0017059	serine C-palmitoyltransferase complex	4	0	0.1	0.85739		GO:0080025	phosphatidylinositol-3,5-bisphosphate binding	25	1	0.6	0.139		GO:0015698	inorganic anion transport	199	26	13.82	0.05112		GO:0000214	tRNA-intron endonuclease complex	3	0	0.21	0.15208		GO:0044183	protein binding involved in protein folding	49	4	3.54	0.31687		GO:0009123	nucleoside monophosphate metabolic process	405	28	27.81	0.98735		GO:0000275
GO:0048609	multicellular organismal reproductive process	433	10	10.4	0.58276		GO:0017086	3-methyl-2-oxobutanoate dehydrogenase (lipoamide) complex	4	0	0.1	0.65279		GO:0080108	S-alkylthiohydroximate lyase activity	7	1	0.17	0.14177		GO:0010564	regulation of cell cycle process	414	26	28.74	0.21854		GO:0005971	ribonucleoside-diphosphate reductase complex	3	0	0.21	0.15337		GO:0045330	aspartyl esterase activity	87	4	6.29	0.03765		GO:0006749	glutathione metabolic process	108	27	7.42	0.00073		GO:0070552
GO:0008544	epidermis development	664	10	15.95	0.62285		GO:0017087	mitochondrial processing peptidase complex	1	0	0.03	0.36725		GO:0090353	polygalacturonase inhibitor activity	18	1	0.43	0.01228		GO:0003002	regionalization	380	26	26.38	0.46269		GO:0000506	glycosylphosphatidylinositol-N-acetylglucosaminyltransferase (GPI-GnT) complex	8	0	0.56	0.15646		GO:0046554	malate dehydrogenase (NADP+) activity	4	4	0.29	0.00064		GO:0046916	cellular transition metal ion homeostasis	191	27	13.12	0.01209		GO:0070545
GO:0043588	skin development	664	10	15.95	0.62285		GO:0017101	aminoacyl-tRNA synthetase multienzyme complex	12	0	0.3	0.02042		GO:0090447	glycerol-3-phosphate 2-O-acyltransferase activity	21	1	0.5	0.4852		GO:0001666	response to hypoxia	171	26	11.87	0.0681		GO:0005697	telomerase holoenzyme complex	11	0	0.77	0.15871		GO:0046577	long-chain-alcohol oxidase activity	19	4	1.37	0.18943		GO:0009072	aromatic amino acid family metabolic process	187	27	12.84	0.01888		GO:0005960
GO:0051240	positive regulation of multicellular organismal process	424	10	10.19	0.64517		GO:0017119	Golgi transport complex	44	0	1.1	0.14059		GO:0090595	acetyl-CoA:L-lysine N6-acetyltransferase	79	1	1.89	0.07323		GO:0051865	protein autoubiquitination	98	25	6.8	0.00023		GO:0033017	sarcoplasmic reticulum membrane	7	0	0.49	0.16337		GO:0046910	pectinesterase inhibitor activity	141	4	10.2	0.52257		GO:0046486	glycerolipid metabolic process	526	27	36.12	0.11066		GO:0005685
GO:0000272	polysaccharide catabolic process	327	10	7.86	0.65166		GO:0018444	translation release factor complex	5	0	0.13	0.99285		GO:0097100	supercoiled DNA binding	5	1	0.12	0.19835		GO:0051817	modification of morphology or physiology of other organism involved in symbiotic interaction	116	25	8.05	0.07329		GO:0000275	mitochondrial proton-transporting ATP synthase complex, catalytic core F(1)	23	0	1.6	0.16381		GO:0047134	protein-disulfide reductase activity	48	4	3.47	0.49432		GO:0010118	stomatal movement	423	27	29.05	0.14281		GO:0030875
GO:0090558	plant epidermis development	598	10	14.37	0.71598		GO:0019008	molybdopterin synthase complex	4	0	0.1	0.58371		GO:0097603	temperature-gated ion channel activity	56	1	1.34	0.33142		GO:0046434	organophosphate catabolic process	361	25	25.06	0.98996		GO:0070552	BRISC complex	11	0	0.77	0.16407		GO:0047216	inositol 3-alpha-galactosyltransferase activity	22	4	1.59	0.32889		GO:1990267	response to transition metal nanoparticle	164	27	11.26	0.2099		GO:0032039
GO:0030855	epithelial cell differentiation	542	10	13.02	0.7415		GO:0019034	viral replication complex	4	0	0.1	0.00087		GO:0097604	temperature-gated cation channel activity	56	1	1.34	0.33142		GO:0044282	small molecule catabolic process	352	25	24.44	0.94186		GO:0070545	PeBoW complex	4	0	0.28	0.16977		GO:0047293	4-hydroxybenzoate nonaprenyltransferase activity	9	4	0.65	0.05834		GO:0061024	membrane organization	627	27	43.06	0.59157		GO:0032116
GO:0071669	plant-type cell wall organization or biogenesis	546	10	13.12	0.75254		GO:0019773	proteasome core complex, alpha-subunit complex	47	0	1.18	0.84239		GO:1901505	carbohydrate derivative transporter activity	235	1	5.62	0.03287		GO:0043331	response to dsRNA	206	25	14.3	0.09346		GO:0005960	glycine cleavage complex	11	0	0.77	0.17472		GO:0048038	quinone binding	71	4	5.14	0.176		GO:0015711	organic anion transport	474	27	32.55	0.75558		GO:0005965
GO:0090407	organophosphate biosynthetic process	1001	10	24.05	0.7617		GO:0019774	proteasome core complex, beta-subunit complex	21	0	0.53	0.37192		GO:0000009	alpha-1,6-mannosyltransferase activity	6	0	0.14	0.309		GO:0042546	cell wall biogenesis	390	25	27.08	0.74408		GO:0030875	rDNA protrusion	4	0	0.28	0.17744		GO:0051538	3 iron, 4 sulfur cluster binding	20	4	1.45	0.01602		GO:0006325	chromatin organization	998	27	68.53	0.90585		GO:0031010
GO:0009913	epidermal cell differentiation	512	10	12.3	0.76511		GO:0022624	proteasome accessory complex	71	0	1.78	0.43134		GO:0000014	single-stranded DNA endodeoxyribonuclease activity	6	0	0.14	0.11371		GO:0035821	modification of morphology or physiology of other organism	116	25	8.05	0.07329		GO:0032039	integrator complex	4	0	0.28	0.18286		GO:0051753	mannan synthase activity	18	4	1.3	0.38039		GO:0042446	hormone biosynthetic process	442	26	30.35	0.01911		GO:0016590
GO:0007010	cytoskeleton organization	774	10	18.59	0.84788		GO:0022625	cytosolic large ribosomal subunit	178	0	4.46	0.59603		GO:0000026	alpha-1,2-mannosyltransferase activity	5	0	0.12	0.96939		GO:0030162	regulation of proteolysis	364	25	25.27	0.8452		GO:0032116	SMC loading complex	4	0	0.28	0.18286		GO:0052866	phosphatidylinositol phosphate phosphatase activity	33	4	2.39	0.46756		GO:1901421	positive regulation of response to alcohol	176	26	12.09	0.05455		GO:0008623
GO:0071248	cellular response to metal ion	133	10	3.2	0.90746		GO:0022627	cytosolic small ribosomal subunit	83	0	2.08	0.6287		GO:0000030	mannosyltransferase activity	48	0	1.15	0.67547		GO:0010090	trichome morphogenesis	185	25	12.84	0.14906		GO:0005965	protein farnesyltransferase complex	4	0	0.28	0.1841		GO:0070577	lysine-acetylated histone binding	20	4	1.45	0.05558		GO:0051640	organelle localization	234	26	16.07	0.08115		GO:0071920
GO:0022603	regulation of anatomical structure morphogenesis	467	10	11.22	0.90952		GO:0030008	TRAPP complex	30	0	0.75	0.76971		GO:0000033	alpha-1,3-mannosyltransferase activity	4	0	0.1	0.22149		GO:0009932	cell tip growth	307	25	21.31	0.39615		GO:0031010	ISWI-type complex	4	0	0.28	0.18425		GO:0097243	flavonoid binding	11	4	0.8	0.09165		GO:0048437	floral organ development	450	26	30.9	0.17329		GO:0030666
GO:0051273	beta-glucan metabolic process	302	10	7.26	0.95331		GO:0030014	CCR4-NOT complex	78	0	1.96	0.79666		GO:0000035	acyl binding	4	0	0.1	0.97402		GO:0009860	pollen tube growth	253	25	17.56	0.01644		GO:0016590	ACF complex	4	0	0.28	0.18425		GO:0097599	xylanase activity	19	4	1.37	0.05182		GO:0098662	inorganic cation transmembrane transport	637	26	43.74	0.2422		GO:0000796
GO:0033043	regulation of organelle organization	742	10	17.83	0.98524		GO:0030015	CCR4-NOT core complex	66	0	1.66	0.70942		GO:0000036	ACP phosphopantetheine attachment site binding involved in fatty acid biosynthetic process	11	0	0.26	0.99934		GO:0009788	negative regulation of abscisic acid-activated signaling pathway	153	25	10.62	0.01503		GO:0008623	CHRAC	4	0	0.28	0.18425		GO:2001147	camalexin binding	11	4	0.8	0.09165		GO:0016999	antibiotic metabolic process	122	26	8.38	0.39147		GO:0030956
GO:0000278	mitotic cell cycle	742	10	17.83	0.99974		GO:0030062	mitochondrial tricarboxylic acid cycle enzyme complex	2	0	0.05	0.65037		GO:0000049	tRNA binding	87	0	2.08	0.28652		GO:0009637	response to blue light	190	25	13.19	0.1186		GO:0071920	cleavage body	4	0	0.28	0.1844		GO:2001227	quercitrin binding	11	4	0.8	0.09165		GO:0009606	tropism	225	26	15.45	0.41382		GO:0017119
GO:0009862	systemic acquired resistance, salicylic acid mediated signaling pathway	48	9	1.15	0.00125		GO:0030117	membrane coat	222	0	5.57	0.03989		GO:0000062	fatty-acyl-CoA binding	25	0	0.6	0.03922		GO:0009141	nucleoside triphosphate metabolic process	499	25	34.64	0.98686		GO:0000796	condensin complex	8	0	0.56	0.19257		GO:0000049	tRNA binding	87	3	6.29	0.33327		GO:0060284	regulation of cell development	216	26	14.83	0.49213		GO:0071439
GO:0010565	regulation of cellular ketone metabolic process	220	9	5.29	0.00347		GO:0030118	clathrin coat	87	0	2.18	0.01582		GO:0000064	L-ornithine transmembrane transporter activity	11	0	0.26	0.953		GO:0006644	phospholipid metabolic process	572	25	39.71	0.10416		GO:0009544	chloroplast ATP synthase complex	8	0	0.56	0.1927		GO:0000250	lanosterol synthase activity	56	3	4.05	0.9381		GO:0044802	single-organism membrane organization	563	26	38.66	0.53856		GO:0005913
GO:0080186	developmental vegetative growth	61	9	1.47	0.01453		GO:0030119	AP-type membrane coat adaptor complex	49	0	1.23	0.06675		GO:0000095	S-adenosyl-L-methionine transmembrane transporter activity	2	0	0.05	0.66197		GO:1900140	regulation of seedling development	213	24	14.79	0.17168		GO:0030956	glutamyl-tRNA(Gln) amidotransferase complex	21	0	1.46	0.19616		GO:0000386	second spliceosomal transesterification activity	15	3	1.09	0.56124		GO:0006270	DNA replication initiation	93	25	6.39	0.00048		GO:0005915
GO:1900056	negative regulation of leaf senescence	37	9	0.89	0.01558		GO:0030120	vesicle coat	157	0	3.94	0.08285		GO:0000104	succinate dehydrogenase activity	11	0	0.26	0.62246		GO:0071248	cellular response to metal ion	133	24	9.23	0.267		GO:0017119	Golgi transport complex	44	0	3.06	0.20483		GO:0000828	inositol hexakisphosphate kinase activity	3	3	0.22	1		GO:0042743	hydrogen peroxide metabolic process	265	25	18.2	0.0325		GO:0031262
GO:0051336	regulation of hydrolase activity	423	9	10.16	0.07735		GO:0030121	AP-1 adaptor complex	9	0	0.23	0.01805		GO:0000107	imidazoleglycerol-phosphate synthase activity	1	0	0.02	0.96828		GO:0051338	regulation of transferase activity	275	24	19.09	0.7089		GO:0005913	cell-cell adherens junction	1	0	0.07	0.20838		GO:0000829	inositol heptakisphosphate kinase activity	3	3	0.22	0.00531		GO:0045088	regulation of innate immune response	329	25	22.59	0.03492		GO:0045263
GO:0098655	cation transmembrane transport	700	9	16.82	0.11847		GO:0030122	AP-2 adaptor complex	7	0	0.18	0.05646		GO:0000146	microfilament motor activity	10	0	0.24	0.97267		GO:0051169	nuclear transport	351	24	24.37	0.41998		GO:0005915	zonula adherens	1	0	0.07	0.20838		GO:0000832	inositol hexakisphosphate 5-kinase activity	3	3	0.22	0.00531		GO:0015672	monovalent inorganic cation transport	423	25	29.05	0.04001		GO:0031897
GO:0018193	peptidyl-amino acid modification	784	9	18.83	0.11988		GO:0030124	AP-4 adaptor complex	8	0	0.2	0.35599		GO:0000149	SNARE binding	72	0	1.72	0.0877		GO:0048509	regulation of meristem development	255	24	17.7	0.56112		GO:0071439	clathrin complex	25	0	1.74	0.20885		GO:0000987	core promoter proximal region sequence-specific DNA binding	78	3	5.64	0.14005		GO:0051510	regulation of unidimensional cell growth	158	25	10.85	0.07404		GO:0045334
GO:0010564	regulation of cell cycle process	414	9	9.95	0.16435		GO:0030125	clathrin vesicle coat	62	0	1.55	0.01243		GO:0000150	recombinase activity	26	0	0.62	0.94183		GO:0021700	developmental maturation	356	24	24.72	0.74853		GO:0031262	Ndc80 complex	11	0	0.77	0.21013		GO:0001085	RNA polymerase II transcription factor binding	87	3	6.29	0.01833		GO:0007167	enzyme linked receptor protein signaling pathway	283	25	19.43	0.12335		GO:0070176
GO:0000097	sulfur amino acid biosynthetic process	87	9	2.09	0.17266		GO:0030126	COPI vesicle coat	62	0	1.55	0.76881		GO:0000171	ribonuclease MRP activity	4	0	0.1	0.35826		GO:0019684	photosynthesis, light reaction	275	24	19.09	0.11994		GO:0031897	Tic complex	8	0	0.56	0.21298		GO:0001159	core promoter proximal region DNA binding	78	3	5.64	0.14005		GO:0009736	cytokinin-activated signaling pathway	189	25	12.98	0.14827		GO:0090571
GO:0051302	regulation of cell division	398	9	9.56	0.27733		GO:0030127	COPII vesicle coat	33	0	0.83	0.3227		GO:0000175	3'-5'-exoribonuclease activity	91	0	2.18	0.64474		GO:0010393	galacturonan metabolic process	273	24	18.95	0.40995		GO:0045263	proton-transporting ATP synthase complex, coupling factor F(o)	28	0	1.95	0.21355		GO:0003727	single-stranded RNA binding	180	3	13.02	0.07467		GO:0071368	cellular response to cytokinin stimulus	192	25	13.18	0.18496		GO:0097361
GO:0010118	stomatal movement	423	9	10.16	0.35478		GO:0030128	clathrin coat of endocytic vesicle	7	0	0.18	0.05646		GO:0000179	rRNA (adenine-N6,N6-)-dimethyltransferase activity	19	0	0.45	0.27815		GO:0010029	regulation of seed germination	212	24	14.72	0.15575		GO:0045334	clathrin-coated endocytic vesicle	11	0	0.77	0.21712		GO:0003730	mRNA 3'-UTR binding	84	3	6.08	0.37462		GO:0070085	glycosylation	421	25	28.91	0.35691		GO:0035452
GO:0047484	regulation of response to osmotic stress	131	9	3.15	0.46255		GO:0030130	clathrin coat of trans-Golgi network vesicle	54	0	1.35	0.06566		GO:0000182	rDNA binding	16	0	0.38	0.26084		GO:0009629	response to gravity	190	24	13.19	0.26462		GO:0070176	DRM complex	9	0	0.63	0.21775		GO:0003830	beta-1,4-mannosylglycoprotein 4-beta-N-acetylglucosaminyltransferase activity	21	3	1.52	0.39698		GO:0000377	RNA splicing, via transesterification reactions with bulged adenosine as nucleophile	617	25	42.37	0.57039		GO:0072687
GO:0019953	sexual reproduction	370	9	8.89	0.47268		GO:0030131	clathrin adaptor complex	39	0	0.98	0.02636		GO:0000213	tRNA-intron endonuclease activity	3	0	0.07	0.1217		GO:0009553	embryo sac development	377	24	26.17	0.01373		GO:0090571	RNA polymerase II transcription repressor complex	9	0	0.63	0.21775		GO:0003854	3-beta-hydroxy-delta5-steroid dehydrogenase activity	32	3	2.32	0.26501		GO:0000375	RNA splicing, via transesterification reactions	626	25	42.99	0.63049		GO:0035974
GO:0000096	sulfur amino acid metabolic process	140	9	3.36	0.52133		GO:0030132	clathrin coat of coated pit	52	0	1.3	0.05996		GO:0000217	DNA secondary structure binding	41	0	0.98	0.93276		GO:0009069	serine family amino acid metabolic process	152	24	10.55	0.55352		GO:0097361	CIA complex	5	0	0.35	0.21878		GO:0003955	NAD(P)H dehydrogenase (quinone) activity	22	3	1.59	0.82218		GO:0009630	gravitropism	184	25	12.64	0.69473		GO:0031617
GO:0048285	organelle fission	629	9	15.11	0.54962		GO:0030133	transport vesicle	163	0	4.09	0.13686		GO:0000224	peptide-N4-(N-acetyl-beta-glucosaminyl)asparagine amidase activity	2	0	0.05	0.64214		GO:0007015	actin filament organization	241	24	16.73	0.48014		GO:0072687	meiotic spindle	1	0	0.07	0.21971		GO:0003958	NADPH-hemoprotein reductase activity	16	3	1.16	0.16467		GO:0010941	regulation of cell death	359	25	24.65	0.71321		GO:0030895
GO:0006721	terpenoid metabolic process	410	9	9.85	0.5728		GO:0030134	ER to Golgi transport vesicle	47	0	1.18	0.4198		GO:0000225	N-acetylglucosaminylphosphatidylinositol deacetylase activity	5	0	0.12	0.54501		GO:0006913	nucleocytoplasmic transport	351	24	24.37	0.41998		GO:0035974	meiotic spindle pole body	1	0	0.07	0.21971		GO:0003989	acetyl-CoA carboxylase activity	12	3	0.87	0.10602		GO:0009629	response to gravity	190	25	13.05	0.80656		GO:0043291
GO:0000910	cytokinesis	486	9	11.68	0.57872		GO:0030137	COPI-coated vesicle	67	0	1.68	0.76179		GO:0000234	phosphoethanolamine N-methyltransferase activity	7	0	0.17	0.71432		GO:2000024	regulation of leaf development	159	23	11.04	0.11093		GO:0031617	NMS complex	1	0	0.07	0.21971		GO:0003999	adenine phosphoribosyltransferase activity	17	3	1.23	0.45771		GO:0008299	isoprenoid biosynthetic process	478	25	32.82	0.81358		GO:0098554
GO:0016458	gene silencing	648	9	15.57	0.61753		GO:0030140	trans-Golgi network transport vesicle	60	0	1.5	0.04517		GO:0000248	C-5 sterol desaturase activity	7	0	0.17	0.28693		GO:1901421	positive regulation of response to alcohol	176	23	12.22	0.11376		GO:0030895	apolipoprotein B mRNA editing enzyme complex	1	0	0.07	0.22246		GO:0004066	asparagine synthase (glutamine-hydrolyzing) activity	18	3	1.3	0.65472		GO:0071695	anatomical structure maturation	310	25	21.29	0.84286		GO:0048770
GO:0031047	gene silencing by RNA	456	9	10.95	0.65449		GO:0030173	integral component of Golgi membrane	38	0	0.95	0.39392		GO:0000253	3-keto sterol reductase activity	1	0	0.02	0.75486		GO:0098662	inorganic cation transmembrane transport	637	23	44.22	0.54727		GO:0043291	RAVE complex	2	0	0.14	0.22376		GO:0004144	diacylglycerol O-acyltransferase activity	70	3	5.06	0.13958		GO:0033365	protein localization to organelle	827	25	56.79	0.93495		GO:0042470
GO:0010026	trichome differentiation	292	9	7.01	0.71499		GO:0030286	dynein complex	39	0	0.98	0.53151		GO:0000254	C-4 methylsterol oxidase activity	11	0	0.26	0.80353		GO:0071359	cellular response to dsRNA	202	23	14.02	0.14219		GO:0098554	cytoplasmic side of endoplasmic reticulum membrane	12	0	0.83	0.22942		GO:0004149	dihydrolipoyllysine-residue succinyltransferase activity	9	3	0.65	0.00314		GO:0042744	hydrogen peroxide catabolic process	226	24	15.52	0.00283		GO:0072379
GO:0019439	aromatic compound catabolic process	986	9	23.69	0.72854		GO:0030289	protein phosphatase 4 complex	2	0	0.05	0.68279		GO:0000268	peroxisome targeting sequence binding	4	0	0.1	0.68182		GO:0070918	production of small RNA involved in gene silencing by RNA	201	23	13.95	0.13677		GO:0048770	pigment granule	1	0	0.07	0.237		GO:0004168	dolichol kinase activity	4	3	0.29	0.02182		GO:0009873	ethylene-activated signaling pathway	204	24	14.01	0.00424		GO:0071818
GO:0061640	cytoskeleton-dependent cytokinesis	462	9	11.1	0.72934		GO:0030313	cell envelope	8	0	0.2	0.79785		GO:0000285	1-phosphatidylinositol-3-phosphate 5-kinase activity	6	0	0.14	0.81433		GO:0070085	glycosylation	421	23	29.23	0.39054		GO:0042470	melanosome	1	0	0.07	0.237		GO:0004305	ethanolamine kinase activity	7	3	0.51	0.05052		GO:0010017	red or far-red light signaling pathway	110	24	7.55	0.00564		GO:0043240
GO:0051094	positive regulation of developmental process	350	9	8.41	0.74103		GO:0030315	T-tubule	54	0	1.35	0.00059		GO:0000293	ferric-chelate reductase activity	4	0	0.1	0.89652		GO:0051321	meiotic cell cycle	404	23	28.05	0.64518		GO:0016469	proton-transporting two-sector ATPase complex	183	0	12.73	0.23753		GO:0004310	farnesyl-diphosphate farnesyltransferase activity	14	3	1.01	0.08985		GO:0010218	response to far red light	119	24	8.17	0.00958		GO:0008023
GO:1901361	organic cyclic compound catabolic process	1015	9	24.38	0.77823		GO:0030425	dendrite	24	0	0.6	0.56636		GO:0000295	adenine nucleotide transmembrane transporter activity	117	0	2.8	0.18962		GO:0048511	rhythmic process	270	23	18.74	0.37019		GO:0072379	ER membrane insertion complex	1	0	0.07	0.24153		GO:0004311	farnesyltranstransferase activity	21	3	1.52	0.1614		GO:0009789	positive regulation of abscisic acid-activated signaling pathway	151	24	10.37	0.03595		GO:0035658
GO:0043069	negative regulation of programmed cell death	134	9	3.22	0.80027		GO:0030427	site of polarized growth	44	0	1.1	0.48961		GO:0000309	nicotinamide-nucleotide adenylyltransferase activity	3	0	0.07	0.92083		GO:0048193	Golgi vesicle transport	466	23	32.35	0.19143		GO:0071818	BAT3 complex	1	0	0.07	0.24153		GO:0004325	ferrochelatase activity	9	3	0.65	0.20509		GO:2000028	regulation of photoperiodism, flowering	197	24	13.53	0.26365		GO:0071005
GO:0046777	protein autophosphorylation	243	9	5.84	0.82656		GO:0030496	midbody	12	0	0.3	0.44649		GO:0000339	RNA cap binding	21	0	0.5	0.93085		GO:0046942	carboxylic acid transport	333	23	23.12	0.54452		GO:0043240	Fanconi anaemia nuclear complex	4	0	0.28	0.24771		GO:0004373	glycogen (starch) synthase activity	17	3	1.23	0.04993		GO:0070301	cellular response to hydrogen peroxide	243	24	16.69	0.2807		GO:0000799
GO:0042886	amide transport	926	9	22.25	0.84594		GO:0030532	small nuclear ribonucleoprotein complex	186	0	4.66	0.08428		GO:0000400	four-way junction DNA binding	29	0	0.69	0.40888		GO:0046916	cellular transition metal ion homeostasis	191	23	13.26	0.01775		GO:0005795	Golgi stack	92	0	6.4	0.25553		GO:0004420	hydroxymethylglutaryl-CoA reductase (NADPH) activity	17	3	1.23	0.01594		GO:0044403	symbiosis, encompassing mutualism through parasitism	244	24	16.76	0.38561		GO:0005854
GO:0006886	intracellular protein transport	1365	9	32.79	0.86424		GO:0030658	transport vesicle membrane	147	0	3.69	0.2566		GO:0000403	Y-form DNA binding	8	0	0.19	0.21594		GO:0046903	secretion	393	23	27.28	0.06077		GO:0035658	Mon1-Ccz1 complex	7	0	0.49	0.25798		GO:0004421	hydroxymethylglutaryl-CoA synthase activity	4	3	0.29	0.02164		GO:0044419	interspecies interaction between organisms	249	24	17.1	0.43287		GO:0043527
GO:0060548	negative regulation of cell death	168	9	4.04	0.88974		GO:0030660	Golgi-associated vesicle membrane	142	0	3.56	0.23089		GO:0000404	heteroduplex DNA loop binding	16	0	0.38	0.97756		GO:0045454	cell redox homeostasis	357	23	24.78	0.78561		GO:0031436	BRCA1-BARD1 complex	17	0	1.18	0.25851		GO:0004536	deoxyribonuclease activity	124	3	8.97	0.98169		GO:0009311	oligosaccharide metabolic process	298	24	20.46	0.43709		GO:0005950
GO:0016482	cytoplasmic transport	1244	9	29.88	0.92132		GO:0030662	coated vesicle membrane	183	0	4.59	0.57159		GO:0000405	bubble DNA binding	8	0	0.19	0.57106		GO:0044724	single-organism carbohydrate catabolic process	344	23	23.88	0.43286		GO:0000780	condensed nuclear chromosome, centromeric region	43	0	2.99	0.25929		GO:0004594	pantothenate kinase activity	18	3	1.3	0.5383		GO:0009167	purine ribonucleoside monophosphate metabolic process	348	24	23.9	0.7497		GO:0031080
GO:0034307	regulation of ascospore formation	8	8	0.19	2.1e-07		GO:0030663	COPI-coated vesicle membrane	67	0	1.68	0.76179		GO:0000406	double-strand/single-strand DNA junction binding	6	0	0.14	0.4228		GO:0042325	regulation of phosphorylation	296	23	20.55	0.38829		GO:0000799	nuclear condensin complex	1	0	0.07	0.25987		GO:0004602	glutathione peroxidase activity	20	3	1.45	0.3657		GO:0009126	purine nucleoside monophosphate metabolic process	348	24	23.9	0.7497		GO:0036379
GO:0010514	induction of conjugation with cellular fusion	8	8	0.19	2.1e-07		GO:0030665	clathrin-coated vesicle membrane	69	0	1.73	0.00622		GO:0000700	mismatch base pair DNA N-glycosylase activity	3	0	0.07	0.11511		GO:0032940	secretion by cell	373	23	25.9	0.03265		GO:0071005	U2-type precatalytic spliceosome	13	0	0.9	0.26193		GO:0004652	polynucleotide adenylyltransferase activity	25	3	1.81	0.86753		GO:0009161	ribonucleoside monophosphate metabolic process	374	24	25.68	0.83206		GO:0005865
GO:0071507	MAPK cascade involved in conjugation with cellular fusion	8	8	0.19	2.1e-07		GO:0030667	secretory granule membrane	10	0	0.25	0.99241		GO:0000701	purine-specific mismatch base pair DNA N-glycosylase activity	3	0	0.07	0.11511		GO:0031050	dsRNA fragmentation	201	23	13.95	0.13677		GO:0005854	nascent polypeptide-associated complex	3	0	0.21	0.26334		GO:0004657	proline dehydrogenase activity	7	3	0.51	0.07018		GO:0042737	drug catabolic process	105	23	7.21	0.00412		GO:0005859
GO:0010120	camalexin biosynthetic process	21	8	0.5	0.00011		GO:0030669	clathrin-coated endocytic vesicle membrane	7	0	0.18	0.05646		GO:0000702	oxidized base lesion DNA N-glycosylase activity	14	0	0.33	0.56468		GO:0022613	ribonucleoprotein complex biogenesis	992	23	68.87	0.64614		GO:0005950	anthranilate synthase complex	5	0	0.35	0.26744		GO:0004664	prephenate dehydratase activity	21	3	1.52	0.79292		GO:0010114	response to red light	146	23	10.03	0.07824		GO:0032389
GO:0009403	toxin biosynthetic process	25	8	0.6	0.00057		GO:0030672	synaptic vesicle membrane	17	0	0.43	0.61738		GO:0000703	oxidized pyrimidine nucleobase lesion DNA N-glycosylase activity	4	0	0.1	0.98985		GO:0022412	cellular process involved in reproduction in multicellular organism	231	23	16.04	0.24932		GO:0043527	tRNA methyltransferase complex	14	0	0.97	0.26847		GO:0004797	thymidine kinase activity	13	3	0.94	0.06719		GO:0051656	establishment of organelle localization	186	23	12.77	0.10299		GO:0000938
GO:0000186	activation of MAPKK activity	26	8	0.62	0.00619		GO:0030673	axolemma	4	0	0.1	0.26706		GO:0000773	phosphatidyl-N-methylethanolamine N-methyltransferase activity	4	0	0.1	0.30943		GO:0016246	RNA interference	152	23	10.55	0.042		GO:0036379	myofilament	2	0	0.14	0.26977		GO:0004806	triglyceride lipase activity	25	3	1.81	0.58147		GO:0009741	response to brassinosteroid	274	23	18.82	0.11398		GO:0009344
GO:0009693	ethylene biosynthetic process	61	8	1.47	0.00664		GO:0030677	ribonuclease P complex	50	0	1.25	0.59061		GO:0000774	adenyl-nucleotide exchange factor activity	20	0	0.48	0.6338		GO:0015849	organic acid transport	333	23	23.12	0.54452		GO:0005865	striated muscle thin filament	2	0	0.14	0.26977		GO:0004843	ubiquitin-specific protease activity	179	3	12.95	0.03302		GO:0009108	coenzyme biosynthetic process	444	23	30.49	0.18311		GO:0030897
GO:0009664	plant-type cell wall organization	362	8	8.7	0.00855		GO:0030681	multimeric ribonuclease P complex	46	0	1.15	0.48178		GO:0000822	inositol hexakisphosphate binding	29	0	0.69	0.45336		GO:0009630	gravitropism	184	23	12.77	0.25908		GO:0005859	muscle myosin complex	2	0	0.14	0.26977		GO:0005083	small GTPase regulator activity	33	3	2.39	0.93208		GO:0048232	male gamete generation	165	23	11.33	0.21007		GO:0097504
GO:0002229	defense response to oomycetes	120	8	2.88	0.01767		GO:0030684	preribosome	200	0	5.02	0.9228		GO:0000823	inositol-1,4,5-trisphosphate 6-kinase activity	4	0	0.1	0.84793		GO:0009205	purine ribonucleoside triphosphate metabolic process	442	23	30.69	0.93232		GO:0032389	MutLalpha complex	3	0	0.21	0.27073		GO:0005092	GDP-dissociation inhibitor activity	33	3	2.39	0.93208		GO:0010948	negative regulation of cell cycle process	197	23	13.53	0.22816		GO:0032797
GO:0030437	ascospore formation	11	8	0.26	0.02562		GO:0030686	90S preribosome	90	0	2.26	0.98114		GO:0000825	inositol tetrakisphosphate 6-kinase activity	4	0	0.1	0.74468		GO:0009199	ribonucleoside triphosphate metabolic process	465	23	32.28	0.89212		GO:0000938	GARP complex	12	0	0.83	0.27396		GO:0005093	Rab GDP-dissociation inhibitor activity	10	3	0.72	0.31073		GO:0043648	dicarboxylic acid metabolic process	224	23	15.38	0.24198		GO:0000800
GO:0043935	sexual sporulation resulting in formation of a cellular spore	11	8	0.26	0.02562		GO:0030687	preribosome, large subunit precursor	52	0	1.3	0.28316		GO:0000828	inositol hexakisphosphate kinase activity	3	0	0.07	0.34937		GO:0009144	purine nucleoside triphosphate metabolic process	444	23	30.82	0.93158		GO:0009344	nitrite reductase complex [NAD(P)H]	4	0	0.28	0.27631		GO:0005253	anion channel activity	69	3	4.99	0.70127		GO:0009914	hormone transport	368	23	25.27	0.2709		GO:0033593
GO:0022413	reproductive process in single-celled organism	13	8	0.31	0.05968		GO:0030688	preribosome, small subunit precursor	12	0	0.3	0.94802		GO:0000829	inositol heptakisphosphate kinase activity	3	0	0.07	0.34937		GO:0009108	coenzyme biosynthetic process	444	23	30.82	0.19225		GO:0097504	Gemini of coiled bodies	3	0	0.21	0.28513		GO:0005326	neurotransmitter transporter activity	7	3	0.51	0.10493		GO:2000070	regulation of response to water deprivation	109	23	7.48	0.30533		GO:0005674
GO:0032505	reproduction of a single-celled organism	13	8	0.31	0.05968		GO:0030689	Noc complex	1	0	0.03	0.70115		GO:0000832	inositol hexakisphosphate 5-kinase activity	3	0	0.07	0.34937		GO:0007623	circadian rhythm	263	23	18.26	0.33813		GO:0032797	SMN complex	3	0	0.21	0.28513		GO:0005384	manganese ion transmembrane transporter activity	22	3	1.59	0.63334		GO:0006650	glycerophospholipid metabolic process	405	23	27.81	0.33283		GO:0035839
GO:0098662	inorganic cation transmembrane transport	637	8	15.3	0.1062		GO:0030690	Noc1p-Noc2p complex	1	0	0.03	0.70115		GO:0000900	translation repressor activity, nucleic acid binding	1	0	0.02	0.46205		GO:0006470	protein dephosphorylation	221	23	15.34	0.38153		GO:0000800	lateral element	3	0	0.21	0.28563		GO:0008083	growth factor activity	37	3	2.68	0.32691		GO:0046395	carboxylic acid catabolic process	220	23	15.11	0.40551		GO:0009317
GO:0034754	cellular hormone metabolic process	165	8	3.96	0.12019		GO:0030691	Noc2p-Noc3p complex	1	0	0.03	0.70115		GO:0000906	6,7-dimethyl-8-ribityllumazine synthase activity	1	0	0.02	0.37277		GO:0006260	DNA replication	633	23	43.95	0.98234		GO:0033593	BRCA2-MAGE-D1 complex	3	0	0.21	0.28563		GO:0008115	sarcosine oxidase activity	3	3	0.22	0.00416		GO:0016054	organic acid catabolic process	220	23	15.11	0.40551		GO:0000276
GO:0070838	divalent metal ion transport	345	8	8.29	0.15161		GO:0030867	rough endoplasmic reticulum membrane	65	0	1.63	0.82857		GO:0000978	RNA polymerase II core promoter proximal region sequence-specific DNA binding	63	0	1.51	0.35299		GO:0005984	disaccharide metabolic process	190	23	13.19	0.31362		GO:0005674	transcription factor TFIIF complex	4	0	0.28	0.28758		GO:0008146	sulfotransferase activity	108	3	7.81	0.77196		GO:0006470	protein dephosphorylation	221	23	15.18	0.49557		GO:0031074
GO:0072511	divalent inorganic cation transport	345	8	8.29	0.15161		GO:0030870	Mre11 complex	10	0	0.25	0.50788		GO:0000979	RNA polymerase II core promoter sequence-specific DNA binding	15	0	0.36	0.62943		GO:0001932	regulation of protein phosphorylation	249	23	17.29	0.29669		GO:0045273	respiratory chain complex II	21	0	1.46	0.28873		GO:0008198	ferrous iron binding	37	3	2.68	0.64983		GO:0044275	cellular carbohydrate catabolic process	184	23	12.64	0.55184		GO:0042564
GO:0048868	pollen tube development	330	8	7.93	0.18705		GO:0030874	nucleolar chromatin	8	0	0.2	0.0228		GO:0000982	RNA polymerase II core promoter proximal region sequence-specific DNA binding transcription factor activity	40	0	0.96	0.47382		GO:2000280	regulation of root development	223	22	15.48	0.0431		GO:0035839	non-growing cell tip	4	0	0.28	0.28926		GO:0008240	tripeptidyl-peptidase activity	4	3	0.29	0.01828		GO:0046034	ATP metabolic process	296	23	20.33	0.60786		GO:0035061
GO:0010119	regulation of stomatal movement	145	8	3.48	0.1985		GO:0030875	rDNA protrusion	4	0	0.1	0.15103		GO:0000990	core RNA polymerase binding transcription factor activity	41	0	0.98	0.31011		GO:2000028	regulation of photoperiodism, flowering	197	22	13.68	0.31621		GO:0009317	acetyl-CoA carboxylase complex	4	0	0.28	0.29058		GO:0008242	omega peptidase activity	18	3	1.3	0.24211		GO:0007059	chromosome segregation	319	23	21.91	0.62615		GO:0000923
GO:0060918	auxin transport	246	8	5.91	0.21421		GO:0030891	VCB complex	5	0	0.13	0.0278		GO:0000991	core RNA polymerase II binding transcription factor activity	16	0	0.38	0.31093		GO:0060284	regulation of cell development	216	22	15	0.83308		GO:0031074	nucleocytoplasmic shuttling complex	9	0	0.63	0.29647		GO:0008308	voltage-gated anion channel activity	66	3	4.77	0.75778		GO:1902531	regulation of intracellular signal transduction	260	23	17.85	0.64814		GO:0008275
GO:0009749	response to glucose	121	8	2.91	0.21523		GO:0030895	apolipoprotein B mRNA editing enzyme complex	1	0	0.03	0.1921		GO:0000993	RNA polymerase II core binding	28	0	0.67	0.54257		GO:0051701	interaction with host	158	22	10.97	0.19821		GO:0042564	NLS-dependent protein nuclear import complex	9	0	0.63	0.29647		GO:0008483	transaminase activity	181	3	13.09	0.79278		GO:0043067	regulation of programmed cell death	282	23	19.36	0.68614		GO:0032589
GO:0009739	response to gibberellin	241	8	5.79	0.21997		GO:0030896	checkpoint clamp complex	7	0	0.18	0.9565		GO:0000995	core RNA polymerase III binding transcription factor activity	6	0	0.14	0.91154		GO:0051302	regulation of cell division	398	22	27.63	0.84405		GO:0035061	interchromatin granule	3	0	0.21	0.29706		GO:0008515	sucrose transmembrane transporter activity	33	3	2.39	0.48239		GO:0010026	trichome differentiation	292	23	20.05	0.73361		GO:0031256
GO:0009746	response to hexose	151	8	3.63	0.33481		GO:0030897	HOPS complex	21	0	0.53	0.23345		GO:0000996	core DNA-dependent RNA polymerase binding promoter specificity activity	19	0	0.45	0.08569		GO:0048581	negative regulation of post-embryonic development	255	22	17.7	0.0494		GO:0000276	mitochondrial proton-transporting ATP synthase complex, coupling factor F(o)	22	0	1.53	0.29733		GO:0008536	Ran GTPase binding	69	3	4.99	0.34083		GO:0006721	terpenoid metabolic process	410	23	28.15	0.85823		GO:0030673
GO:0051321	meiotic cell cycle	404	8	9.71	0.39346		GO:0030904	retromer complex	27	0	0.68	0.48868		GO:0001013	RNA polymerase I regulatory region DNA binding	8	0	0.19	0.02056		GO:0046777	protein autophosphorylation	243	22	16.87	0.75025		GO:0000923	equatorial microtubule organizing center	4	0	0.28	0.29739		GO:0008940	nitrate reductase activity	6	3	0.43	0.10055		GO:0071241	cellular response to inorganic substance	227	23	15.59	0.8854		GO:0044611
GO:0051783	regulation of nuclear division	164	8	3.94	0.40616		GO:0030906	retromer complex, inner shell	11	0	0.28	0.26072		GO:0001016	RNA polymerase III regulatory region DNA binding	1	0	0.02	0.18479		GO:0046685	response to arsenic-containing substance	43	22	2.99	8.4e-09		GO:0008275	gamma-tubulin small complex	4	0	0.28	0.29739		GO:0008942	nitrite reductase [NAD(P)H] activity	3	3	0.22	0.0038		GO:0010016	shoot system morphogenesis	368	23	25.27	0.94935		GO:0005956
GO:1903046	meiotic cell cycle process	350	8	8.41	0.48917		GO:0030914	STAGA complex	3	0	0.08	0.36363		GO:0001025	RNA polymerase III transcription factor binding	11	0	0.26	0.52089		GO:0045859	regulation of protein kinase activity	209	22	14.51	0.1282		GO:0032589	neuron projection membrane	4	0	0.28	0.29824		GO:0008970	phosphatidylcholine 1-acylhydrolase activity	21	3	1.52	0.00263		GO:0009553	embryo sac development	377	22	25.89	0.02487		GO:0009368
GO:0051445	regulation of meiotic cell cycle	49	8	1.18	0.50217		GO:0030915	Smc5-Smc6 complex	23	0	0.58	0.75749		GO:0001032	RNA polymerase III type 3 promoter DNA binding	1	0	0.02	0.18479		GO:0044036	cell wall macromolecule metabolic process	338	22	23.47	0.78523		GO:0031256	leading edge membrane	4	0	0.28	0.29824		GO:0009011	starch synthase activity	11	3	0.8	0.03409		GO:0009788	negative regulation of abscisic acid-activated signaling pathway	153	22	10.51	0.03388		GO:0009840
GO:0000746	conjugation	14	8	0.34	0.52738		GO:0030929	ADPG pyrophosphorylase complex	3	0	0.08	0.52022		GO:0001046	core promoter sequence-specific DNA binding	63	0	1.51	0.19394		GO:0043549	regulation of kinase activity	227	22	15.76	0.18713		GO:0030673	axolemma	4	0	0.28	0.29824		GO:0010277	chlorophyllide a oxygenase [overall] activity	14	3	1.01	0.47289		GO:0051187	cofactor catabolic process	82	22	5.63	0.03413		GO:0033106
GO:0000747	conjugation with cellular fusion	14	8	0.34	0.52738		GO:0030931	heterotetrameric ADPG pyrophosphorylase complex	3	0	0.08	0.52022		GO:0001047	core promoter binding	71	0	1.7	0.28538		GO:0042545	cell wall modification	378	22	26.24	0.41921		GO:0043679	axon terminus	4	0	0.28	0.29961		GO:0015154	disaccharide transmembrane transporter activity	33	3	2.39	0.48239		GO:0007178	transmembrane receptor protein serine/threonine kinase signaling pathway	245	22	16.82	0.04335		GO:0034702
GO:0010015	root morphogenesis	540	8	12.97	0.53426		GO:0030956	glutamyl-tRNA(Gln) amidotransferase complex	21	0	0.53	0.09604		GO:0001055	RNA polymerase II activity	2	0	0.05	0.75078		GO:0042127	regulation of cell proliferation	256	22	17.77	0.47656		GO:0044306	neuron projection terminus	4	0	0.28	0.29961		GO:0015157	oligosaccharide transmembrane transporter activity	33	3	2.39	0.48239		GO:0016036	cellular response to phosphate starvation	151	22	10.37	0.10956		GO:0034703
GO:0040020	regulation of meiosis	37	8	0.89	0.5354		GO:0030964	NADH dehydrogenase complex	73	0	1.83	0.63992		GO:0001076	RNA polymerase II transcription factor binding transcription factor activity	51	0	1.22	0.9651		GO:0034614	cellular response to reactive oxygen species	308	22	21.38	0.1444		GO:0043195	terminal bouton	4	0	0.28	0.29961		GO:0015185	gamma-aminobutyric acid transmembrane transporter activity	5	3	0.36	0.03762		GO:0048193	Golgi vesicle transport	466	22	32	0.18809		GO:0034704
GO:0007186	G-protein coupled receptor signaling pathway	126	8	3.03	0.53564		GO:0030981	cortical microtubule cytoskeleton	47	0	1.18	0.85139		GO:0001077	RNA polymerase II core promoter proximal region sequence-specific DNA binding transcription factor activity involved in positive regulation of transcription	29	0	0.69	0.54329		GO:0033365	protein localization to organelle	827	22	57.41	0.93834		GO:0044611	nuclear pore inner ring	1	0	0.07	0.30646		GO:0015238	drug transmembrane transporter activity	136	3	9.84	0.43854		GO:0045333	cellular respiration	275	22	18.88	0.26194		GO:1990246
GO:0034293	sexual sporulation	54	8	1.3	0.54766		GO:0031004	potassium ion-transporting ATPase complex	9	0	0.23	0.89332		GO:0001078	RNA polymerase II core promoter proximal region sequence-specific DNA binding transcription factor activity involved in negative regulation of transcription	4	0	0.1	0.45479		GO:0030422	production of siRNA involved in RNA interference	147	22	10.21	0.04502		GO:0005956	protein kinase CK2 complex	12	0	0.83	0.31187		GO:0016157	sucrose synthase activity	48	3	3.47	0.25805		GO:0009451	RNA modification	1882	22	129.24	0.40848		GO:0009326
GO:0052314	phytoalexin metabolic process	30	8	0.72	0.55281		GO:0031010	ISWI-type complex	4	0	0.1	0.15761		GO:0001083	RNA polymerase II basal transcription factor binding transcription factor activity	16	0	0.38	0.79633		GO:0010941	regulation of cell death	359	22	24.92	0.7209		GO:0033106	cis-Golgi network membrane	1	0	0.07	0.31664		GO:0016411	acylglycerol O-acyltransferase activity	78	3	5.64	0.05537		GO:0010073	meristem maintenance	300	22	20.6	0.66744		GO:1902503
GO:0052315	phytoalexin biosynthetic process	30	8	0.72	0.55281		GO:0031011	Ino80 complex	41	0	1.03	0.30685		GO:0001091	RNA polymerase II basal transcription factor binding	14	0	0.33	0.02864		GO:0010224	response to UV-B	157	22	10.9	0.08497		GO:0034702	ion channel complex	1	0	0.07	0.32113		GO:0016417	S-acyltransferase activity	82	3	5.93	0.83947		GO:0015849	organic acid transport	333	22	22.87	0.69139		GO:0010170
GO:0044764	multi-organism cellular process	220	8	5.29	0.58692		GO:0031074	nucleocytoplasmic shuttling complex	9	0	0.23	0.25254		GO:0001093	TFIIB-class transcription factor binding	10	0	0.24	0.02379		GO:0009789	positive regulation of abscisic acid-activated signaling pathway	151	22	10.48	0.05709		GO:0034703	cation channel complex	1	0	0.07	0.32113		GO:0016421	CoA carboxylase activity	13	3	0.94	0.14254		GO:0046942	carboxylic acid transport	333	22	22.87	0.69139		GO:0008180
GO:0007126	meiotic nuclear division	310	8	7.45	0.61137		GO:0031080	nuclear pore outer ring	14	0	0.35	0.1737		GO:0001094	TFIID-class transcription factor binding	4	0	0.1	0.15019		GO:0009070	serine family amino acid biosynthetic process	103	22	7.15	0.2189		GO:0034704	calcium channel complex	1	0	0.07	0.32113		GO:0016504	peptidase activator activity	6	3	0.43	0.10217		GO:0051129	negative regulation of cellular component organization	317	22	21.77	0.7352		GO:0030687
GO:2000243	positive regulation of reproductive process	159	8	3.82	0.61494		GO:0031082	BLOC complex	7	0	0.18	0.07722		GO:0001098	basal transcription machinery binding	42	0	1	0.30972		GO:0006778	porphyrin-containing compound metabolic process	254	22	17.63	0.82472		GO:1990246	uniplex complex	1	0	0.07	0.32113		GO:0016635	oxidoreductase activity, acting on the CH-CH group of donors, quinone or related compound as acceptor	19	3	1.37	0.74417		GO:1902580	single-organism cellular localization	464	22	31.86	0.9437		GO:0000778
GO:0009108	coenzyme biosynthetic process	444	8	10.67	0.65399		GO:0031083	BLOC-1 complex	7	0	0.18	0.07722		GO:0001099	basal RNA polymerase II transcription machinery binding	42	0	1	0.30972		GO:0006733	oxidoreduction coenzyme metabolic process	259	22	17.98	0.63011		GO:0009326	formate dehydrogenase complex	1	0	0.07	0.3233		GO:0016653	oxidoreductase activity, acting on NAD(P)H, heme protein as acceptor	23	3	1.66	0.30306		GO:1902578	single-organism localization	464	22	31.86	0.9437		GO:0045495
GO:0031329	regulation of cellular catabolic process	511	8	12.28	0.69596		GO:0031201	SNARE complex	63	0	1.58	0.26355		GO:0001102	RNA polymerase II activating transcription factor binding	7	0	0.17	0.15082		GO:1903046	meiotic cell cycle process	350	21	24.3	0.76787		GO:1902503	adenylyltransferase complex	1	0	0.07	0.32341		GO:0016655	oxidoreductase activity, acting on NAD(P)H, quinone or similar compound as acceptor	115	3	8.32	0.22865		GO:1901292	nucleoside phosphate catabolic process	267	22	18.33	0.97001		GO:0043186
GO:0000271	polysaccharide biosynthetic process	495	8	11.89	0.71495		GO:0031205	endoplasmic reticulum Sec complex	5	0	0.13	0.0314		GO:0001103	RNA polymerase II repressing transcription factor binding	19	0	0.45	0.46363		GO:1902074	response to salt	50	21	3.47	3e-06		GO:0010170	glucose-1-phosphate adenylyltransferase complex	1	0	0.07	0.32341		GO:0016748	succinyltransferase activity	9	3	0.65	1		GO:0009407	toxin catabolic process	59	21	4.05	5.3e-05		GO:0060293
GO:0015994	chlorophyll metabolic process	181	8	4.35	0.75154		GO:0031207	Sec62/Sec63 complex	4	0	0.1	0.06275		GO:0001104	RNA polymerase II transcription cofactor activity	7	0	0.17	0.11733		GO:1901292	nucleoside phosphate catabolic process	267	21	18.54	0.99138		GO:0031985	Golgi cisterna	30	0	2.09	0.3286		GO:0016751	S-succinyltransferase activity	9	3	0.65	1		GO:0010119	regulation of stomatal movement	145	21	9.96	0.02421		GO:0000777
GO:0033692	cellular polysaccharide biosynthetic process	429	8	10.31	0.76212		GO:0031209	SCAR complex	8	0	0.2	0.92864		GO:0001105	RNA polymerase II transcription coactivator activity	7	0	0.17	0.11733		GO:0090501	RNA phosphodiester bond hydrolysis	353	21	24.51	0.14707		GO:0098562	cytoplasmic side of membrane	45	0	3.13	0.33422		GO:0016769	transferase activity, transferring nitrogenous groups	181	3	13.09	0.79278		GO:0048863	stem cell differentiation	162	21	11.12	0.0591		GO:0005684
GO:0043937	regulation of sporulation	17	8	0.41	0.76946		GO:0031211	endoplasmic reticulum palmitoyltransferase complex	4	0	0.1	0.85739		GO:0001128	RNA polymerase II transcription coactivator activity involved in preinitiation complex assembly	7	0	0.17	0.11733		GO:0071695	anatomical structure maturation	310	21	21.52	0.87299		GO:0008180	COP9 signalosome	13	0	0.9	0.34221		GO:0016781	phosphotransferase activity, paired acceptors	12	3	0.87	0.39591		GO:0045490	pectin catabolic process	143	21	9.82	0.12015		GO:0043253
GO:0042173	regulation of sporulation resulting in formation of a cellular spore	17	8	0.41	0.76946		GO:0031228	intrinsic component of Golgi membrane	38	0	0.95	0.39392		GO:0001129	TBP-class protein binding RNA polymerase II transcription factor activity involved in preinitiation complex assembly	16	0	0.38	0.79633		GO:0071489	cellular response to red or far red light	133	21	9.23	0.09501		GO:0005749	mitochondrial respiratory chain complex II	19	0	1.32	0.34669		GO:0016799	hydrolase activity, hydrolyzing N-glycosyl compounds	81	3	5.86	0.2271		GO:0006694	steroid biosynthetic process	180	21	12.36	0.14312		GO:0005955
GO:0030435	sporulation resulting in formation of a cellular spore	76	8	1.83	0.77911		GO:0031231	intrinsic component of peroxisomal membrane	27	0	0.68	0.77939		GO:0001132	TBP-class protein binding RNA polymerase II transcription factor activity	16	0	0.38	0.79633		GO:0070925	organelle assembly	498	21	34.57	0.36032		GO:0045257	succinate dehydrogenase complex (ubiquinone)	19	0	1.32	0.34669		GO:0016832	aldehyde-lyase activity	48	3	3.47	0.92574		GO:0009251	glucan catabolic process	119	21	8.17	0.25122		GO:0030906
GO:0043934	sporulation	76	8	1.83	0.77911		GO:0031234	extrinsic component of cytoplasmic side of plasma membrane	19	0	0.48	0.59701		GO:0001134	transcription factor recruiting transcription factor activity	16	0	0.38	0.87282		GO:0060918	auxin transport	246	21	17.08	0.21641		GO:0045281	succinate dehydrogenase complex	19	0	1.32	0.34669		GO:0016843	amine-lyase activity	47	3	3.4	0.31392		GO:0001666	response to hypoxia	171	21	11.74	0.2948		GO:0030124
GO:0009894	regulation of catabolic process	577	8	13.86	0.82221		GO:0031235	intrinsic component of the cytoplasmic side of the plasma membrane	2	0	0.05	0.99921		GO:0001135	RNA polymerase II transcription factor recruiting transcription factor activity	16	0	0.38	0.87282		GO:0051247	positive regulation of protein metabolic process	430	21	29.85	0.98424		GO:0045283	fumarate reductase complex	19	0	1.32	0.34669		GO:0016844	strictosidine synthase activity	47	3	3.4	0.31392		GO:0070925	organelle assembly	498	21	34.2	0.31027		GO:0033179
GO:0016114	terpenoid biosynthetic process	324	8	7.78	0.84267		GO:0031248	protein acetyltransferase complex	143	0	3.59	0.97685		GO:0001139	core RNA polymerase II recruiting transcription factor activity	4	0	0.1	0.61703		GO:0046486	glycerolipid metabolic process	526	21	36.52	0.07584		GO:0000347	THO complex	42	0	2.92	0.35521		GO:0016851	magnesium chelatase activity	11	3	0.8	0.36985		GO:0036293	response to decreased oxygen levels	183	21	12.57	0.37594		GO:0031932
GO:0030029	actin filament-based process	365	8	8.77	0.84807		GO:0031252	cell leading edge	16	0	0.4	0.81032		GO:0001156	TFIIIC-class transcription factor binding	11	0	0.26	0.52089		GO:0046148	pigment biosynthetic process	372	21	25.83	0.73623		GO:0031011	Ino80 complex	41	0	2.85	0.35821		GO:0016885	ligase activity, forming carbon-carbon bonds	13	3	0.94	0.14254		GO:0048581	negative regulation of post-embryonic development	255	21	17.51	0.3802		GO:0000427
GO:0015833	peptide transport	900	8	21.62	0.8525		GO:0031253	cell projection membrane	5	0	0.13	0.65355		GO:0001158	enhancer sequence-specific DNA binding	4	0	0.1	0.58199		GO:0045488	pectin metabolic process	261	21	18.12	0.36809		GO:0045495	pole plasm	6	0	0.42	0.36173		GO:0017022	myosin binding	51	3	3.69	0.78147		GO:0070482	response to oxygen levels	188	21	12.91	0.40572		GO:0044232
GO:0030036	actin cytoskeleton organization	288	8	6.92	0.90136		GO:0031254	cell trailing edge	11	0	0.28	0.98193		GO:0001163	RNA polymerase I regulatory region sequence-specific DNA binding	8	0	0.19	0.02056		GO:0044003	modification by symbiont of host morphology or physiology	104	21	7.22	0.13672		GO:0043186	P granule	6	0	0.42	0.36173		GO:0017025	TBP-class protein binding	58	3	4.2	0.38937		GO:0032940	secretion by cell	373	21	25.61	0.42825		GO:0042382
GO:0000280	nuclear division	534	8	12.83	0.97065		GO:0031256	leading edge membrane	4	0	0.1	0.26706		GO:0001164	RNA polymerase I CORE element sequence-specific DNA binding	8	0	0.19	0.02056		GO:0043067	regulation of programmed cell death	282	21	19.58	0.74501		GO:0060293	germ plasm	6	0	0.42	0.36173		GO:0018580	nitronate monooxygenase activity	5	3	0.36	0.04172		GO:0046903	secretion	393	21	26.99	0.6331		GO:0017087
GO:0006974	cellular response to DNA damage stimulus	1212	8	29.12	0.99849		GO:0031257	cell trailing edge membrane	5	0	0.13	0.92582		GO:0001190	RNA polymerase II transcription factor binding transcription factor activity involved in positive regulation of transcription	10	0	0.24	0.04683		GO:0032270	positive regulation of cellular protein metabolic process	427	21	29.64	0.98314		GO:0030687	preribosome, large subunit precursor	52	0	3.62	0.36205		GO:0019104	DNA N-glycosylase activity	69	3	4.99	0.37913		GO:0044247	cellular polysaccharide catabolic process	114	21	7.83	0.71697		GO:0070390
GO:0006281	DNA repair	1059	8	25.44	0.99869		GO:0031261	DNA replication preinitiation complex	15	0	0.38	0.09981		GO:0001227	RNA polymerase II transcription regulatory region sequence-specific DNA binding transcription factor activity involved in negative regulation of transcription	6	0	0.14	0.95229		GO:0009739	response to gibberellin	241	21	16.73	0.11699		GO:0000778	condensed nuclear chromosome kinetochore	38	0	2.64	0.36295		GO:0019783	small conjugating protein-specific protease activity	197	3	14.25	0.08559		GO:0006366	transcription from RNA polymerase II promoter	1030	21	70.73	0.75798		GO:0071819
GO:0032005	signal transduction involved in conjugation with cellular fusion	8	8	0.19	1		GO:0031262	Ndc80 complex	11	0	0.28	0.16477		GO:0001530	lipopolysaccharide binding	6	0	0.14	0.99029		GO:0007276	gamete generation	217	21	15.07	0.68254		GO:0043253	chloroplast ribosome	1	0	0.07	0.36649		GO:0022853	active ion transmembrane transporter activity	70	3	5.06	0.54985		GO:0006302	double-strand break repair	291	21	19.98	0.8328		GO:0072546
GO:0046217	indole phytoalexin metabolic process	21	8	0.5	1		GO:0031298	replication fork protection complex	16	0	0.4	0.99204		GO:0001653	peptide receptor activity	55	0	1.31	0.02738		GO:0007167	enzyme linked receptor protein signaling pathway	283	21	19.65	0.29592		GO:0000777	condensed chromosome kinetochore	42	0	2.92	0.36716		GO:0030151	molybdenum ion binding	18	3	1.3	0.59186		GO:0032270	positive regulation of cellular protein metabolic process	427	21	29.32	0.97702		GO:0001401
GO:0043450	alkene biosynthetic process	61	8	1.47	1		GO:0031302	intrinsic component of endosome membrane	2	0	0.05	0.61518		GO:0001664	G-protein coupled receptor binding	17	0	0.41	0.60097		GO:0006563	L-serine metabolic process	96	21	6.66	0.31195		GO:0005955	calcineurin complex	1	0	0.07	0.37703		GO:0030545	receptor regulator activity	14	3	1.01	0.081		GO:0051247	positive regulation of protein metabolic process	430	21	29.53	0.97785		GO:0009349
GO:0043449	cellular alkene metabolic process	61	8	1.47	1		GO:0031303	integral component of endosome membrane	2	0	0.05	0.61518		GO:0001671	ATPase activator activity	37	0	0.88	0.19861		GO:0006366	transcription from RNA polymerase II promoter	1030	21	71.51	0.76931		GO:0009533	chloroplast stromal thylakoid	18	0	1.25	0.38508		GO:0030546	receptor activator activity	14	3	1.01	0.081		GO:0009143	nucleoside triphosphate catabolic process	202	21	13.87	0.98374		GO:0071010
GO:0000750	pheromone-dependent signal transduction involved in conjugation with cellular fusion	8	8	0.19	1		GO:0031306	intrinsic component of mitochondrial outer membrane	14	0	0.35	0.87309		GO:0001716	L-amino-acid oxidase activity	4	0	0.1	0.58787		GO:0006074	(1->3)-beta-D-glucan metabolic process	80	21	5.55	1		GO:0031932	TORC2 complex	2	0	0.14	0.38985		GO:0031559	oxidosqualene cyclase activity	60	3	4.34	0.93382		GO:0090487	secondary metabolite catabolic process	59	21	4.05	1		GO:0034455
GO:0052317	camalexin metabolic process	21	8	0.5	1		GO:0031307	integral component of mitochondrial outer membrane	14	0	0.35	0.87309		GO:0001727	lipid kinase activity	2	0	0.05	0.37532		GO:0000096	sulfur amino acid metabolic process	140	21	9.72	0.33022		GO:0030124	AP-4 adaptor complex	8	0	0.56	0.39003		GO:0032453	histone demethylase activity (H3-K4 specific)	17	3	1.23	0.4726		GO:1902074	response to salt	50	20	3.43	1.2e-05		GO:0000127
GO:0000749	response to pheromone involved in conjugation with cellular fusion	8	8	0.19	1		GO:0031312	extrinsic component of organelle membrane	36	0	0.9	0.92266		GO:0001729	ceramide kinase activity	2	0	0.05	0.37532		GO:0097435	fibril organization	228	20	15.83	0.64225		GO:0030906	retromer complex, inner shell	11	0	0.77	0.39041		GO:0033764	steroid dehydrogenase activity, acting on the CH-OH group of donors, NAD or NADP as acceptor	35	3	2.53	0.17635		GO:2000280	regulation of root development	223	20	15.31	0.02112		GO:0071821
GO:0046999	regulation of conjugation	8	8	0.19	1		GO:0031313	extrinsic component of endosome membrane	3	0	0.08	0.99998		GO:0001735	prenylcysteine oxidase activity	3	0	0.07	0.70306		GO:0072594	establishment of protein localization to organelle	621	20	43.11	0.86333		GO:0044232	organelle membrane contact site	7	0	0.49	0.3916		GO:0033857	diphosphoinositol-pentakisphosphate kinase activity	3	3	0.22	0.00531		GO:0048438	floral whorl development	310	20	21.29	0.08991		GO:0030914
GO:1900673	olefin metabolic process	69	8	1.66	1		GO:0031314	extrinsic component of mitochondrial inner membrane	19	0	0.48	0.63168		GO:0001872	(1->3)-beta-D-glucan binding	12	0	0.29	0.67732		GO:0072524	pyridine-containing compound metabolic process	227	20	15.76	0.88622		GO:0033179	proton-transporting V-type ATPase, V0 domain	37	0	2.57	0.393		GO:0034485	phosphatidylinositol-3,4,5-trisphosphate 5-phosphatase activity	18	3	1.3	0.52762		GO:0033014	tetrapyrrole biosynthetic process	217	20	14.9	0.22498		GO:1903293
GO:1900674	olefin biosynthetic process	61	8	1.47	1		GO:0031332	RNAi effector complex	30	0	0.75	0.37631		GO:0002020	protease binding	45	0	1.08	0.33144		GO:0051607	defense response to virus	169	20	11.73	0.30114		GO:0000427	plastid-encoded plastid RNA polymerase complex	13	0	0.9	0.39366		GO:0034594	phosphatidylinositol trisphosphate phosphatase activity	18	3	1.3	0.52762		GO:2000024	regulation of leaf development	159	20	10.92	0.26249		GO:0008287
GO:0034306	regulation of sexual sporulation	8	8	0.19	1		GO:0031350	intrinsic component of plastid membrane	45	0	1.13	0.93704		GO:0002039	p53 binding	8	0	0.19	0.27052		GO:0051510	regulation of unidimensional cell growth	158	20	10.97	0.32498		GO:0042382	paraspeckles	2	0	0.14	0.3992		GO:0034647	histone demethylase activity (H3-trimethyl-K4 specific)	6	3	0.43	0.06901		GO:0009615	response to virus	238	20	16.34	0.26399		GO:0000811
GO:0071444	cellular response to pheromone	8	8	0.19	1		GO:0031351	integral component of plastid membrane	45	0	1.13	0.93704		GO:0002151	G-quadruplex RNA binding	7	0	0.17	0.77021		GO:0046688	response to copper ion	50	20	3.47	1.4e-05		GO:0017087	mitochondrial processing peptidase complex	1	0	0.07	0.4009		GO:0035197	siRNA binding	23	3	1.66	0.1905		GO:0000281	mitotic cytokinesis	205	20	14.08	0.26857		GO:0000314
GO:0009700	indole phytoalexin biosynthetic process	21	8	0.5	1		GO:0031352	intrinsic component of plastid inner membrane	9	0	0.23	0.82181		GO:0002153	steroid receptor RNA activator RNA binding	4	0	0.1	0.57703		GO:0046395	carboxylic acid catabolic process	220	20	15.27	0.75451		GO:0042555	MCM complex	36	0	2.5	0.40531		GO:0036033	mediator complex binding	3	3	0.22	0.00568		GO:0040011	locomotion	259	20	17.79	0.27173		GO:0000312
GO:0031136	positive regulation of conjugation	8	8	0.19	1		GO:0031353	integral component of plastid inner membrane	9	0	0.23	0.82181		GO:0002161	aminoacyl-tRNA editing activity	32	0	0.76	0.15116		GO:0046351	disaccharide biosynthetic process	86	20	5.97	0.19309		GO:0070390	transcription export complex 2	3	0	0.21	0.40681		GO:0036374	glutathione hydrolase activity	8	3	0.58	0.17165		GO:0002252	immune effector process	253	20	17.37	0.30031		GO:0016235
GO:0031137	regulation of conjugation with cellular fusion	8	8	0.19	1		GO:0031354	intrinsic component of plastid outer membrane	36	0	0.9	0.89109		GO:0003688	DNA replication origin binding	32	0	0.76	0.99491		GO:0044275	cellular carbohydrate catabolic process	184	20	12.77	0.65255		GO:0071819	DUBm complex	3	0	0.21	0.40681		GO:0042300	beta-amyrin synthase activity	57	3	4.12	0.93703		GO:0000398	mRNA splicing, via spliceosome	568	20	39	0.62394		GO:0000818
GO:0031139	positive regulation of conjugation with cellular fusion	8	8	0.19	1		GO:0031355	integral component of plastid outer membrane	36	0	0.9	0.89109		GO:0003689	DNA clamp loader activity	13	0	0.31	0.12391		GO:0042254	ribosome biogenesis	797	20	55.33	0.58856		GO:0009349	riboflavin synthase complex	1	0	0.07	0.40983		GO:0042947	glucoside transmembrane transporter activity	14	3	1.01	0.96972		GO:0006357	regulation of transcription from RNA polymerase II promoter	883	20	60.64	0.7271		GO:0000444
GO:0019236	response to pheromone	8	8	0.19	1		GO:0031356	intrinsic component of chloroplast inner membrane	9	0	0.23	0.82181		GO:0003691	double-stranded telomeric DNA binding	24	0	0.57	0.40418		GO:0034660	ncRNA metabolic process	1208	20	83.87	0.78336		GO:0001401	mitochondrial sorting and assembly machinery complex	5	0	0.35	0.41004		GO:0045552	dihydrokaempferol 4-reductase activity	4	3	0.29	0.01703		GO:0010383	cell wall polysaccharide metabolic process	243	20	16.69	0.76805		GO:0031415
GO:0009692	ethylene metabolic process	61	8	1.47	1		GO:0031357	integral component of chloroplast inner membrane	9	0	0.23	0.82181		GO:0003724	RNA helicase activity	239	0	5.71	0.28737		GO:0034284	response to monosaccharide	170	20	11.8	0.06955		GO:0072546	ER membrane protein complex	14	0	0.97	0.41048		GO:0046030	inositol trisphosphate phosphatase activity	13	3	0.94	0.33093		GO:0016114	terpenoid biosynthetic process	324	20	22.25	0.86287		GO:0005736
GO:0043940	regulation of sexual sporulation resulting in formation of a cellular spore	8	8	0.19	1		GO:0031358	intrinsic component of chloroplast outer membrane	36	0	0.9	0.89109		GO:0003725	double-stranded RNA binding	82	0	1.96	0.74396		GO:0031400	negative regulation of protein modification process	163	20	11.32	0.00344		GO:0034455	t-UTP complex	3	0	0.21	0.41547		GO:0046316	gluconokinase activity	3	3	0.22	0.00406		GO:0009166	nucleotide catabolic process	246	20	16.89	0.96489		GO:0032588
GO:0071289	cellular response to nickel ion	7	7	0.17	1.5e-06		GO:0031359	integral component of chloroplast outer membrane	36	0	0.9	0.89109		GO:0003730	mRNA 3'-UTR binding	84	0	2.01	0.21605		GO:0016568	chromatin modification	671	20	46.58	0.96971		GO:0000127	transcription factor TFIIIC complex	3	0	0.21	0.41703		GO:0048018	receptor agonist activity	14	3	1.01	0.081		GO:0046685	response to arsenic-containing substance	43	19	2.95	2.8e-06		GO:0000110
GO:0080169	cellular response to boron-containing substance deprivation	15	7	0.36	0.00013		GO:0031360	intrinsic component of thylakoid membrane	1	0	0.03	0.96919		GO:0003743	translation initiation factor activity	355	0	8.49	0.64762		GO:0016054	organic acid catabolic process	220	20	15.27	0.75451		GO:0071821	FANCM-MHF complex	8	0	0.56	0.42445		GO:0051002	ligase activity, forming nitrogen-metal bonds	11	3	0.8	0.36985		GO:0046688	response to copper ion	50	19	3.43	2.8e-05		GO:0090576
GO:2000762	regulation of phenylpropanoid metabolic process	45	7	1.08	0.00295		GO:0031361	integral component of thylakoid membrane	1	0	0.03	0.96919		GO:0003747	translation release factor activity	44	0	1.05	0.56506		GO:0015672	monovalent inorganic cation transport	423	20	29.37	0.15108		GO:0005880	nuclear microtubule	4	0	0.28	0.42479		GO:0051003	ligase activity, forming nitrogen-metal bonds, forming coordination complexes	11	3	0.8	0.36985		GO:0009765	photosynthesis, light harvesting	100	19	6.87	0.00348		GO:0034066
GO:0071219	cellular response to molecule of bacterial origin	29	7	0.7	0.00821		GO:0031390	Ctf18 RFC-like complex	13	0	0.33	0.4196		GO:0003755	peptidyl-prolyl cis-trans isomerase activity	230	0	5.5	0.20493		GO:0010118	stomatal movement	423	20	29.37	0.26862		GO:0030914	STAGA complex	3	0	0.21	0.42655		GO:0051117	ATPase binding	80	3	5.79	0.00447		GO:0009867	jasmonic acid mediated signaling pathway	313	19	21.49	0.01272		GO:0032045
GO:0019216	regulation of lipid metabolic process	177	7	4.25	0.00904		GO:0031414	N-terminal protein acetyltransferase complex	20	0	0.5	0.97502		GO:0003785	actin monomer binding	15	0	0.36	0.50558		GO:0009808	lignin metabolic process	190	20	13.19	0.20657		GO:0019774	proteasome core complex, beta-subunit complex	21	0	1.46	0.42838		GO:0051752	phosphoglucan, water dikinase activity	4	3	0.29	0.02063		GO:0071395	cellular response to jasmonic acid stimulus	333	19	22.87	0.01295		GO:0031931
GO:0031407	oxylipin metabolic process	71	7	1.71	0.01357		GO:0031415	NatA complex	8	0	0.2	0.41914		GO:0003796	lysozyme activity	1	0	0.02	0.57381		GO:0009312	oligosaccharide biosynthetic process	115	20	7.98	0.12303		GO:0000811	GINS complex	3	0	0.21	0.43433		GO:0051787	misfolded protein binding	21	3	1.52	0.21351		GO:0035690	cellular response to drug	242	19	16.62	0.04736		GO:0038201
GO:0032269	negative regulation of cellular protein metabolic process	470	7	11.29	0.01457		GO:0031416	NatB complex	4	0	0.1	0.99935		GO:0003823	antigen binding	3	0	0.07	0.60696		GO:0009308	amine metabolic process	328	20	22.77	0.11554		GO:0031201	SNARE complex	63	0	4.38	0.43625		GO:0051996	squalene synthase activity	14	3	1.01	0.08985		GO:1901616	organic hydroxy compound catabolic process	109	19	7.48	0.06695		GO:0033095
GO:0031408	oxylipin biosynthetic process	70	7	1.68	0.02135		GO:0031417	NatC complex	8	0	0.2	0.8592		GO:0003825	alpha,alpha-trehalose-phosphate synthase (UDP-forming) activity	8	0	0.19	0.56329		GO:0009123	nucleoside monophosphate metabolic process	405	20	28.12	0.99042		GO:1903293	phosphatase complex	75	0	5.22	0.43778		GO:0052637	delta 3-trans-hexadecenoic acid phosphatidylglycerol desaturase activity	3	3	0.22	0.00517		GO:0034284	response to monosaccharide	170	19	11.67	0.1304		GO:0043541
GO:0051248	negative regulation of protein metabolic process	496	7	11.92	0.03506		GO:0031428	box C/D snoRNP complex	12	0	0.3	0.50838		GO:0003826	alpha-ketoacid dehydrogenase activity	4	0	0.1	0.63511		GO:0007126	meiotic nuclear division	310	20	21.52	0.87112		GO:0008287	protein serine/threonine phosphatase complex	75	0	5.22	0.43778		GO:0052723	inositol hexakisphosphate 1-kinase activity	3	3	0.22	0.00531		GO:0006779	porphyrin-containing compound biosynthetic process	185	19	12.7	0.13415		GO:0000813
GO:1900057	positive regulation of leaf senescence	40	7	0.96	0.05646		GO:0031429	box H/ACA snoRNP complex	15	0	0.38	0.10834		GO:0003836	beta-galactoside (CMP) alpha-2,3-sialyltransferase activity	4	0	0.1	0.32007		GO:0005992	trehalose biosynthetic process	69	20	4.79	0.00068		GO:0000312	plastid small ribosomal subunit	3	0	0.21	0.44218		GO:0052724	inositol hexakisphosphate 3-kinase activity	3	3	0.22	0.00531		GO:0048582	positive regulation of post-embryonic development	205	19	14.08	0.24732		GO:0033276
GO:0042631	cellular response to water deprivation	44	7	1.06	0.07379		GO:0031430	M band	56	0	1.4	0.00762		GO:0003837	beta-ureidopropionase activity	6	0	0.14	0.034		GO:0005991	trehalose metabolic process	85	20	5.9	0.47836		GO:0000314	organellar small ribosomal subunit	11	0	0.77	0.44475		GO:0052745	inositol phosphate phosphatase activity	39	3	2.82	0.11827		GO:0009699	phenylpropanoid biosynthetic process	236	19	16.21	0.2738		GO:0044279
GO:0030258	lipid modification	305	7	7.33	0.10281		GO:0031436	BRCA1-BARD1 complex	17	0	0.43	0.18709		GO:0003838	sterol 24-C-methyltransferase activity	8	0	0.19	0.35135		GO:0000097	sulfur amino acid biosynthetic process	87	20	6.04	0.46837		GO:0016235	aggresome	11	0	0.77	0.44649		GO:0070678	preprotein binding	10	3	0.72	0.158		GO:0007267	cell-cell signaling	282	19	19.36	0.28429		GO:0044218
GO:0046885	regulation of hormone biosynthetic process	87	7	2.09	0.11019		GO:0031463	Cul3-RING ubiquitin ligase complex	36	0	0.9	0.99664		GO:0003839	gamma-glutamylcyclotransferase activity	10	0	0.24	0.05326		GO:1902580	single-organism cellular localization	464	19	32.21	0.94469		GO:0090568	nuclear transcriptional repressor complex	76	0	5.29	0.44754		GO:0090484	drug transporter activity	136	3	9.84	0.43854		GO:0051193	regulation of cofactor metabolic process	180	19	12.36	0.33876		GO:0033644
GO:0071462	cellular response to water stimulus	48	7	1.15	0.11118		GO:0031464	Cul4A-RING E3 ubiquitin ligase complex	5	0	0.13	0.04871		GO:0003841	1-acylglycerol-3-phosphate O-acyltransferase activity	5	0	0.12	0.01352		GO:1902578	single-organism localization	464	19	32.21	0.94469		GO:0000439	core TFIIH complex	28	0	1.95	0.45199		GO:1902417	(+)-abscisic acid D-glucopyranosyl ester transmembrane transporter activity	13	3	0.94	6e-05		GO:0006972	hyperosmotic response	132	19	9.06	0.34826		GO:0022624
GO:0070588	calcium ion transmembrane transport	201	7	4.83	0.11385		GO:0031465	Cul4B-RING E3 ubiquitin ligase complex	9	0	0.23	0.04658		GO:0003844	1,4-alpha-glucan branching enzyme activity	15	0	0.36	0.00409		GO:1901659	glycosyl compound biosynthetic process	408	19	28.33	0.76131		GO:0000818	nuclear MIS12/MIND complex	4	0	0.28	0.45199		GO:0000064	L-ornithine transmembrane transporter activity	11	2	0.8	0.7113		GO:0010639	negative regulation of organelle organization	261	19	17.92	0.37816		GO:0005838
GO:0032350	regulation of hormone metabolic process	122	7	2.93	0.1286		GO:0031499	TRAMP complex	4	0	0.1	0.87814		GO:0003846	2-acylglycerol O-acyltransferase activity	3	0	0.07	0.39316		GO:0061024	membrane organization	627	19	43.53	0.75807		GO:0000444	MIS12/MIND type complex	4	0	0.28	0.45199		GO:0000104	succinate dehydrogenase activity	11	2	0.8	0.46771		GO:0045596	negative regulation of cell differentiation	205	19	14.08	0.43152		GO:0030127
GO:0006816	calcium ion transport	213	7	5.12	0.13363		GO:0031501	mannosyltransferase complex	6	0	0.15	0.86096		GO:0003848	2-amino-4-hydroxy-6-hydroxymethyldihydropteridine diphosphokinase activity	7	0	0.17	0.1784		GO:0048438	floral whorl development	310	19	21.52	0.35471		GO:0031415	NatA complex	8	0	0.56	0.45406		GO:0000234	phosphoethanolamine N-methyltransferase activity	7	2	0.51	0.32621		GO:0008037	cell recognition	491	19	33.72	0.45041		GO:0005688
GO:0048438	floral whorl development	310	7	7.45	0.13914		GO:0031510	SUMO activating enzyme complex	2	0	0.05	0.11036		GO:0003849	3-deoxy-7-phosphoheptulonate synthase activity	20	0	0.48	0.70231		GO:0044802	single-organism membrane organization	563	19	39.09	0.66385		GO:0032588	trans-Golgi network membrane	31	0	2.16	0.46021		GO:0000254	C-4 methylsterol oxidase activity	11	2	0.8	0.674		GO:0044770	cell cycle phase transition	215	19	14.76	0.50951		GO:0016602
GO:0043413	macromolecule glycosylation	381	7	9.15	0.15799		GO:0031513	nonmotile primary cilium	11	0	0.28	0.72222		GO:0003852	2-isopropylmalate synthase activity	4	0	0.1	0.21979		GO:0044764	multi-organism cellular process	220	19	15.27	0.3772		GO:0000110	nucleotide-excision repair factor 1 complex	4	0	0.28	0.46321		GO:0000822	inositol hexakisphosphate binding	29	2	2.1	0.26594		GO:0044772	mitotic cell cycle phase transition	201	19	13.8	0.54865		GO:0071007
GO:0006486	protein glycosylation	381	7	9.15	0.15799		GO:0031515	tRNA (m1A) methyltransferase complex	6	0	0.15	0.11899		GO:0003854	3-beta-hydroxy-delta5-steroid dehydrogenase activity	32	0	0.76	0.19535		GO:0043413	macromolecule glycosylation	381	19	26.45	0.2758		GO:0034066	RIC1-RGP1 guanyl-nucleotide exchange factor complex	1	0	0.07	0.46643		GO:0000978	RNA polymerase II core promoter proximal region sequence-specific DNA binding	63	2	4.56	0.39037		GO:0048509	regulation of meristem development	255	19	17.51	0.5812		GO:0000445
GO:0009100	glycoprotein metabolic process	405	7	9.73	0.16004		GO:0031519	PcG protein complex	36	0	0.9	0.74262		GO:0003855	3-dehydroquinate dehydratase activity	13	0	0.31	0.19272		GO:0032101	regulation of response to external stimulus	367	19	25.48	0.18765		GO:0032045	guanyl-nucleotide exchange factor complex	1	0	0.07	0.46643		GO:0000981	sequence-specific DNA binding RNA polymerase II transcription factor activity	175	2	12.66	0.57093		GO:0072523	purine-containing compound catabolic process	204	19	14.01	0.64494		GO:0000346
GO:0009926	auxin polar transport	218	7	5.24	0.2042		GO:0031594	neuromuscular junction	17	0	0.43	0.75348		GO:0003856	3-dehydroquinate synthase activity	14	0	0.33	0.59807		GO:0010073	meristem maintenance	300	19	20.83	0.59832		GO:0031931	TORC1 complex	10	0	0.7	0.47134		GO:0001047	core promoter binding	71	2	5.14	0.32071		GO:0031047	gene silencing by RNA	456	19	31.31	0.82998		GO:0032301
GO:0022607	cellular component assembly	2092	7	50.26	0.20678		GO:0031595	nuclear proteasome complex	17	0	0.43	0.78185		GO:0003857	3-hydroxyacyl-CoA dehydrogenase activity	31	0	0.74	0.67826		GO:0009166	nucleotide catabolic process	246	19	17.08	0.99217		GO:0038201	TOR complex	10	0	0.7	0.47134		GO:0001076	RNA polymerase II transcription factor binding transcription factor activity	51	2	3.69	0.97644		GO:0009164	nucleoside catabolic process	175	19	12.02	0.85464		GO:0032302
GO:0009101	glycoprotein biosynthetic process	390	7	9.37	0.21707		GO:0031597	cytosolic proteasome complex	18	0	0.45	0.47987		GO:0003860	3-hydroxyisobutyryl-CoA hydrolase activity	63	0	1.51	0.13679		GO:0009161	ribonucleoside monophosphate metabolic process	374	19	25.97	0.64112		GO:0043541	UDP-N-acetylglucosamine transferase complex	11	0	0.77	0.47181		GO:0001083	RNA polymerase II basal transcription factor binding transcription factor activity	16	2	1.16	0.79416		GO:0042454	ribonucleoside catabolic process	175	19	12.02	0.85464		GO:0045277
GO:0051346	negative regulation of hydrolase activity	226	7	5.43	0.24099		GO:0031617	NMS complex	1	0	0.03	0.18947		GO:0003861	3-isopropylmalate dehydratase activity	4	0	0.1	0.19906		GO:0009101	glycoprotein biosynthetic process	390	19	27.08	0.32483		GO:0033095	aleurone grain	25	0	1.74	0.47403		GO:0001098	basal transcription machinery binding	42	2	3.04	0.74686		GO:0006152	purine nucleoside catabolic process	175	19	12.02	0.85464		GO:0033588
GO:0006779	porphyrin-containing compound biosynthetic process	185	7	4.44	0.26236		GO:0031618	nuclear pericentric heterochromatin	1	0	0.03	0.56082		GO:0003862	3-isopropylmalate dehydrogenase activity	10	0	0.24	0.83447		GO:0009100	glycoprotein metabolic process	405	19	28.12	0.32315		GO:0033276	transcription factor TFTC complex	8	0	0.56	0.47658		GO:0001099	basal RNA polymerase II transcription machinery binding	42	2	3.04	0.74686		GO:1901658	glycosyl compound catabolic process	188	19	12.91	0.90833		GO:0031390
GO:0009064	glutamine family amino acid metabolic process	192	7	4.61	0.26294		GO:0031672	A band	56	0	1.4	1		GO:0003864	3-methyl-2-oxobutanoate hydroxymethyltransferase activity	2	0	0.05	0.18301		GO:0007346	regulation of mitotic cell cycle	373	19	25.9	0.44057		GO:0044279	other organism membrane	21	0	1.46	0.47672		GO:0001129	TBP-class protein binding RNA polymerase II transcription factor activity involved in preinitiation complex assembly	16	2	1.16	0.79416		GO:0043414	macromolecule methylation	580	19	39.83	0.95807		GO:0034245
GO:0045927	positive regulation of growth	143	7	3.44	0.26965		GO:0031897	Tic complex	8	0	0.2	0.16303		GO:0003865	3-oxo-5-alpha-steroid 4-dehydrogenase activity	11	0	0.26	0.39898		GO:0006865	amino acid transport	142	19	9.86	0.0621		GO:0044218	other organism cell membrane	21	0	1.46	0.47672		GO:0001132	TBP-class protein binding RNA polymerase II transcription factor activity	16	2	1.16	0.79416		GO:0048544	recognition of pollen	481	18	33.03	7e-09		GO:0070505
GO:0006865	amino acid transport	142	7	3.41	0.28903		GO:0031901	early endosome membrane	16	0	0.4	0.9999		GO:0003866	3-phosphoshikimate 1-carboxyvinyltransferase activity	7	0	0.17	0.85031		GO:0006486	protein glycosylation	381	19	26.45	0.2758		GO:0033644	host cell membrane	21	0	1.46	0.47672		GO:0001716	L-amino-acid oxidase activity	4	2	0.29	0.17066		GO:0017001	antibiotic catabolic process	37	18	2.54	1.8e-06		GO:0044420
GO:0070085	glycosylation	421	7	10.11	0.30271		GO:0031902	late endosome membrane	32	0	0.8	0.99981		GO:0003868	4-hydroxyphenylpyruvate dioxygenase activity	4	0	0.1	0.59217		GO:0006401	RNA catabolic process	438	19	30.41	0.53324		GO:0022624	proteasome accessory complex	71	0	4.94	0.47958		GO:0002151	G-quadruplex RNA binding	7	2	0.51	0.18818		GO:0009816	defense response to bacterium, incompatible interaction	129	18	8.86	0.00087		GO:0009360
GO:0051193	regulation of cofactor metabolic process	180	7	4.32	0.32277		GO:0031903	microbody membrane	79	0	1.98	0.08017		GO:0003871	5-methyltetrahydropteroyltriglutamate-homocysteine S-methyltransferase activity	4	0	0.1	0.24643		GO:0006357	regulation of transcription from RNA polymerase II promoter	883	19	61.3	0.73713		GO:0005838	proteasome regulatory particle	71	0	4.94	0.47958		GO:0003684	damaged DNA binding	97	2	7.02	0.38396		GO:0006887	exocytosis	251	18	17.24	0.00435		GO:0005784
GO:0080135	regulation of cellular response to stress	242	7	5.81	0.36109		GO:0031904	endosome lumen	6	0	0.15	0.81995		GO:0003873	6-phosphofructo-2-kinase activity	4	0	0.1	0.05997		GO:0002831	regulation of response to biotic stimulus	300	19	20.83	0.13379		GO:0005688	U6 snRNP	14	0	0.97	0.48127		GO:0003746	translation elongation factor activity	102	2	7.38	0.82203		GO:0051606	detection of stimulus	244	18	16.76	0.01472		GO:0071004
GO:0042537	benzene-containing compound metabolic process	119	7	2.86	0.42776		GO:0031907	microbody lumen	23	0	0.58	0.34119		GO:0003876	AMP deaminase activity	8	0	0.19	0.89444		GO:0000041	transition metal ion transport	157	19	10.9	0.77233		GO:0030127	COPII vesicle coat	33	0	2.3	0.48189		GO:0003785	actin monomer binding	15	2	1.09	0.57261		GO:0019827	stem cell maintenance	123	18	8.45	0.04174		GO:0035578
GO:0071216	cellular response to biotic stimulus	67	7	1.61	0.42783		GO:0031931	TORC1 complex	10	0	0.25	0.32557		GO:0003879	ATP phosphoribosyltransferase activity	5	0	0.12	0.19035		GO:2000762	regulation of phenylpropanoid metabolic process	45	18	3.12	0.00032		GO:0016602	CCAAT-binding factor complex	27	0	1.88	0.48455		GO:0003886	DNA (cytosine-5-)-methyltransferase activity	17	2	1.23	0.0174		GO:0031349	positive regulation of defense response	240	18	16.48	0.06418		GO:0000243
GO:0010876	lipid localization	342	7	8.22	0.43806		GO:0031932	TORC2 complex	2	0	0.05	0.35713		GO:0003880	protein C-terminal carboxyl O-methyltransferase activity	4	0	0.1	0.98983		GO:2000242	negative regulation of reproductive process	183	18	12.7	0.42703		GO:0000445	THO complex part of transcription export complex	13	0	0.9	0.48823		GO:0003905	alkylbase DNA N-glycosylase activity	27	2	1.95	0.38583		GO:0016125	sterol metabolic process	163	18	11.19	0.07233		GO:0030929
GO:0006869	lipid transport	288	7	6.92	0.64348		GO:0031965	nuclear membrane	48	0	1.2	0.03686		GO:0003881	CDP-diacylglycerol-inositol 3-phosphatidyltransferase activity	4	0	0.1	0.6094		GO:0071446	cellular response to salicylic acid stimulus	121	18	8.4	0.03033		GO:0000346	transcription export complex	13	0	0.9	0.48823		GO:0003985	acetyl-CoA C-acetyltransferase activity	9	2	0.65	0.15087		GO:0048864	stem cell development	145	18	9.96	0.11052		GO:0030931
GO:0090056	regulation of chlorophyll metabolic process	77	7	1.85	0.67318		GO:0031970	organelle envelope lumen	52	0	1.3	0.88735		GO:0003883	CTP synthase activity	20	0	0.48	0.0233		GO:0051606	detection of stimulus	244	18	16.94	0.02937		GO:0032301	MutSalpha complex	6	0	0.42	0.48839		GO:0003988	acetyl-CoA C-acyltransferase activity	12	2	0.87	0.33648		GO:0009060	aerobic respiration	192	18	13.18	0.21862		GO:0016593
GO:0045454	cell redox homeostasis	357	7	8.58	0.71902		GO:0031977	thylakoid lumen	137	0	3.44	0.68724		GO:0003885	D-arabinono-1,4-lactone oxidase activity	11	0	0.26	0.77413		GO:0051052	regulation of DNA metabolic process	421	18	29.23	0.84753		GO:0032302	MutSbeta complex	6	0	0.42	0.48839		GO:0003998	acylphosphatase activity	2	2	0.14	0.03089		GO:0043413	macromolecule glycosylation	381	18	26.16	0.2963		GO:0043614
GO:2000028	regulation of photoperiodism, flowering	197	7	4.73	0.72675		GO:0031978	plastid thylakoid lumen	46	0	1.15	0.9671		GO:0003886	DNA (cytosine-5-)-methyltransferase activity	17	0	0.41	0.02641		GO:0045927	positive regulation of growth	143	18	9.93	0.12864		GO:0045277	respiratory chain complex IV	6	0	0.42	0.49272		GO:0004032	alditol:NADP+ 1-oxidoreductase activity	2	2	0.14	0.02577		GO:0006486	protein glycosylation	381	18	26.16	0.2963		GO:0001405
GO:1901401	regulation of tetrapyrrole metabolic process	79	7	1.9	0.74842		GO:0031985	Golgi cisterna	30	0	0.75	0.26479		GO:0003896	DNA primase activity	11	0	0.26	0.1568		GO:0045471	response to ethanol	20	18	1.39	4.4e-13		GO:0033588	Elongator holoenzyme complex	18	0	1.25	0.49548		GO:0004089	carbonate dehydratase activity	34	2	2.46	0.07995		GO:0009100	glycoprotein metabolic process	405	18	27.81	0.31935		GO:0070993
GO:1901659	glycosyl compound biosynthetic process	408	7	9.8	0.75945		GO:0032009	early phagosome	6	0	0.15	0.87983		GO:0003904	deoxyribodipyrimidine photo-lyase activity	4	0	0.1	0.77014		GO:0044728	DNA methylation or demethylation	222	18	15.41	0.49932		GO:0031390	Ctf18 RFC-like complex	13	0	0.9	0.50819		GO:0004133	glycogen debranching enzyme activity	12	2	0.87	0.27224		GO:0009101	glycoprotein biosynthetic process	390	18	26.78	0.32109		GO:0008274
GO:0071478	cellular response to radiation	269	7	6.46	0.77134		GO:0032039	integrator complex	4	0	0.1	0.1412		GO:0003905	alkylbase DNA N-glycosylase activity	27	0	0.65	0.30782		GO:0031401	positive regulation of protein modification process	326	18	22.63	0.95228		GO:0097346	INO80-type complex	45	0	3.13	0.51436		GO:0004134	4-alpha-glucanotransferase activity	8	2	0.58	0.47965		GO:1901401	regulation of tetrapyrrole metabolic process	79	18	5.42	0.34963		GO:0000931
GO:0016144	S-glycoside biosynthetic process	65	7	1.56	0.79804		GO:0032040	small-subunit processome	107	0	2.68	0.65097		GO:0003906	DNA-(apurinic or apyrimidinic site) lyase activity	46	0	1.1	0.84947		GO:0031348	negative regulation of defense response	229	18	15.9	0.71482		GO:0044297	cell body	18	0	1.25	0.51436		GO:0004335	galactokinase activity	14	2	1.01	0.28606		GO:0010051	xylem and phloem pattern formation	162	18	11.12	0.35346		GO:0010005
GO:0019761	glucosinolate biosynthetic process	65	7	1.56	0.79804		GO:0032044	DSIF complex	15	0	0.38	0.09618		GO:0003909	DNA ligase activity	21	0	0.5	0.37668		GO:0016126	sterol biosynthetic process	79	18	5.48	0.00641		GO:0034245	mitochondrial DNA-directed RNA polymerase complex	13	0	0.9	0.52376		GO:0004439	phosphatidylinositol-4,5-bisphosphate 5-phosphatase activity	16	2	1.16	0.77827		GO:0034248	regulation of cellular amide metabolic process	257	18	17.65	0.37016		GO:0016234
GO:0019758	glycosinolate biosynthetic process	65	7	1.56	0.79804		GO:0032045	guanyl-nucleotide exchange factor complex	1	0	0.03	0.43381		GO:0003910	DNA ligase (ATP) activity	21	0	0.5	0.37668		GO:0015994	chlorophyll metabolic process	181	18	12.57	0.77325		GO:0070505	pollen coat	1	0	0.07	0.52502		GO:0004476	mannose-6-phosphate isomerase activity	6	2	0.43	0.18214		GO:0090056	regulation of chlorophyll metabolic process	77	18	5.29	0.41111		GO:0035145
GO:0010036	response to boron-containing substance	24	7	0.58	0.85187		GO:0032116	SMC loading complex	4	0	0.1	0.1412		GO:0003913	DNA photolyase activity	9	0	0.22	0.78118		GO:0010218	response to far red light	119	18	8.26	0.15526		GO:0044420	extracellular matrix part	1	0	0.07	0.52502		GO:0004520	endodeoxyribonuclease activity	105	2	7.6	0.98127		GO:0051701	interaction with host	158	18	10.85	0.44983		GO:0033186
GO:0080029	cellular response to boron-containing substance levels	24	7	0.58	0.85187		GO:0032133	chromosome passenger complex	5	0	0.13	0.52133		GO:0003916	DNA topoisomerase activity	88	0	2.1	0.78493		GO:0010016	shoot system morphogenesis	368	18	25.55	0.95346		GO:0009360	DNA polymerase III complex	2	0	0.14	0.53094		GO:0004535	poly(A)-specific ribonuclease activity	52	2	3.76	0.13284		GO:0000725	recombinational repair	215	18	14.76	0.48163		GO:0009331
GO:0071482	cellular response to light stimulus	240	7	5.77	0.88674		GO:0032279	asymmetric synapse	3	0	0.08	0.98814		GO:0003917	DNA topoisomerase type I activity	30	0	0.72	0.90936		GO:0009926	auxin polar transport	218	18	15.13	0.14585		GO:0035578	azurophil granule lumen	4	0	0.28	0.54089		GO:0004551	nucleotide diphosphatase activity	20	2	1.45	0.09524		GO:0000724	double-strand break repair via homologous recombination	211	18	14.49	0.489		GO:0034515
GO:1902580	single-organism cellular localization	464	7	11.15	0.92117		GO:0032299	ribonuclease H2 complex	8	0	0.2	0.094		GO:0003918	DNA topoisomerase type II (ATP-hydrolyzing) activity	47	0	1.12	0.76843		GO:0009863	salicylic acid mediated signaling pathway	116	18	8.05	0.03281		GO:0030929	ADPG pyrophosphorylase complex	3	0	0.21	0.54907		GO:0004557	alpha-galactosidase activity	27	2	1.95	0.39805		GO:0006401	RNA catabolic process	438	18	30.08	0.50227		GO:0030173
GO:1902578	single-organism localization	464	7	11.15	0.92117		GO:0032300	mismatch repair complex	24	0	0.6	0.61645		GO:0003919	FMN adenylyltransferase activity	8	0	0.19	0.41003		GO:0009704	de-etiolation	39	18	2.71	5.5e-06		GO:0030931	heterotetrameric ADPG pyrophosphorylase complex	3	0	0.21	0.54907		GO:0004564	beta-fructofuranosidase activity	35	2	2.53	0.65976		GO:0051493	regulation of cytoskeleton organization	183	18	12.57	0.58601		GO:0031228
GO:0010016	shoot system morphogenesis	368	7	8.84	0.93894		GO:0032301	MutSalpha complex	6	0	0.15	0.43639		GO:0003921	GMP synthase activity	2	0	0.05	0.83179		GO:0009167	purine ribonucleoside monophosphate metabolic process	348	18	24.16	0.56196		GO:0043614	multi-eIF complex	15	0	1.04	0.55422		GO:0004575	sucrose alpha-glucosidase activity	35	2	2.53	0.65976		GO:0009812	flavonoid metabolic process	220	18	15.11	0.72956		GO:0044447
GO:0046700	heterocycle catabolic process	880	7	21.14	0.96621		GO:0032302	MutSbeta complex	6	0	0.15	0.43639		GO:0003922	GMP synthase (glutamine-hydrolyzing) activity	2	0	0.05	0.83179		GO:0009143	nucleoside triphosphate catabolic process	202	18	14.02	0.98919		GO:0001405	presequence translocase-associated import motor	8	0	0.56	0.55721		GO:0004617	phosphoglycerate dehydrogenase activity	6	2	0.43	0.24728		GO:0044764	multi-organism cellular process	220	18	15.11	0.7496		GO:0097540
GO:0044270	cellular nitrogen compound catabolic process	878	7	21.09	0.98755		GO:0032389	MutLalpha complex	3	0	0.08	0.21666		GO:0003923	GPI-anchor transamidase activity	8	0	0.19	0.62111		GO:0009126	purine nucleoside monophosphate metabolic process	348	18	24.16	0.56196		GO:0008274	gamma-tubulin ring complex	9	0	0.63	0.56017		GO:0004693	cyclin-dependent protein serine/threonine kinase activity	68	2	4.92	0.70725		GO:0009165	nucleotide biosynthetic process	599	18	41.13	0.7542		GO:0097545
GO:0010045	response to nickel cation	7	7	0.17	1		GO:0032391	photoreceptor connecting cilium	11	0	0.28	0.72222		GO:0003933	GTP cyclohydrolase activity	16	0	0.38	0.34116		GO:0007267	cell-cell signaling	282	18	19.58	0.28738		GO:0000931	gamma-tubulin large complex	9	0	0.63	0.56017		GO:0004707	MAP kinase activity	50	2	3.62	0.90237		GO:1901293	nucleoside phosphate biosynthetic process	599	18	41.13	0.7542		GO:0005879
GO:0009759	indole glucosinolate biosynthetic process	16	6	0.38	0.00221		GO:0032432	actin filament bundle	12	0	0.3	0.49238		GO:0003934	GTP cyclohydrolase I activity	7	0	0.17	0.61404		GO:0006304	DNA modification	238	18	16.52	0.39906		GO:0010005	cortical microtubule, transverse to long axis	9	0	0.63	0.56258		GO:0004743	pyruvate kinase activity	70	2	5.06	0.52495		GO:0009875	pollen-pistil interaction	492	18	33.79	0.81096		GO:0044352
GO:0009690	cytokinin metabolic process	103	6	2.47	0.00238		GO:0032541	cortical endoplasmic reticulum	2	0	0.05	0.83739		GO:0003935	GTP cyclohydrolase II activity	9	0	0.22	0.54616		GO:1901293	nucleoside phosphate biosynthetic process	599	17	41.59	0.85788		GO:0016234	inclusion body	17	0	1.18	0.56375		GO:0004818	glutamate-tRNA ligase activity	18	2	1.3	0.61154		GO:1901699	cellular response to nitrogen compound	321	18	22.04	0.81217		GO:0044354
GO:0006074	(1->3)-beta-D-glucan metabolic process	80	6	1.92	0.0035		GO:0032578	aleurone grain membrane	6	0	0.15	0.86342		GO:0003937	IMP cyclohydrolase activity	4	0	0.1	0.75619		GO:1900542	regulation of purine nucleotide metabolic process	179	17	12.43	0.77278		GO:0070993	translation preinitiation complex	44	0	3.06	0.56378		GO:0004970	ionotropic glutamate receptor activity	36	2	2.6	0.47131		GO:0006417	regulation of translation	302	18	20.74	0.84748		GO:0031618
GO:0033591	response to L-ascorbic acid	19	6	0.46	0.0041		GO:0032580	Golgi cisterna membrane	15	0	0.38	0.09179		GO:0003938	IMP dehydrogenase activity	6	0	0.14	0.90136		GO:1900055	regulation of leaf senescence	88	17	6.11	0.052		GO:0035145	exon-exon junction complex	12	0	0.83	0.56597		GO:0005049	nuclear export signal receptor activity	12	2	0.87	0.48327		GO:0051338	regulation of transferase activity	275	18	18.88	0.85462		GO:0090577
GO:0034389	lipid particle organization	42	6	1.01	0.02709		GO:0032585	multivesicular body membrane	4	0	0.1	0.11333		GO:0003942	N-acetyl-gamma-glutamyl-phosphate reductase activity	3	0	0.07	0.77073		GO:0080148	negative regulation of response to water deprivation	31	17	2.15	6e-07		GO:0033186	CAF-1 complex	3	0	0.21	0.56642		GO:0005200	structural constituent of cytoskeleton	106	2	7.67	0.05323		GO:0007067	mitotic nuclear division	237	18	16.27	0.92726		GO:0008541
GO:0052545	callose localization	124	6	2.98	0.02756		GO:0032586	protein storage vacuole membrane	7	0	0.18	0.8013		GO:0003949	1-(5-phosphoribosyl)-5-[(5-phosphoribosylamino)methylideneamino]imidazole-4-carboxamide isomerase activity	10	0	0.24	0.61829		GO:0072523	purine-containing compound catabolic process	204	17	14.16	0.73908		GO:0009331	glycerol-3-phosphate dehydrogenase complex	19	0	1.32	0.5804		GO:0005230	extracellular ligand-gated ion channel activity	36	2	2.6	0.47131		GO:0046777	protein autophosphorylation	243	18	16.69	0.93521		GO:0010445
GO:0033037	polysaccharide localization	124	6	2.98	0.02756		GO:0032588	trans-Golgi network membrane	31	0	0.78	0.32502		GO:0003951	NAD+ kinase activity	38	0	0.91	0.83129		GO:0048863	stem cell differentiation	162	17	11.25	0.22236		GO:0034515	proteasome storage granule	3	0	0.21	0.58297		GO:0005287	high-affinity basic amino acid transmembrane transporter activity	4	2	0.29	0.22637		GO:0006605	protein targeting	650	18	44.64	0.94603		GO:0031428
GO:0052542	defense response by callose deposition	94	6	2.26	0.03248		GO:0032589	neuron projection membrane	4	0	0.1	0.26706		GO:0003952	NAD+ synthase (glutamine-hydrolyzing) activity	6	0	0.14	0.57946		GO:0048232	male gamete generation	165	17	11.46	0.81686		GO:0044447	axoneme part	4	0	0.28	0.58839		GO:0005289	high-affinity arginine transmembrane transporter activity	4	2	0.29	0.22637		GO:0030162	regulation of proteolysis	364	18	25	0.95819		GO:0005771
GO:0052547	regulation of peptidase activity	155	6	3.72	0.03392		GO:0032783	ELL-EAF complex	4	0	0.1	0.74636		GO:0003954	NADH dehydrogenase activity	79	0	1.89	0.1873		GO:0046034	ATP metabolic process	296	17	20.55	0.40884		GO:0097540	axonemal central pair	4	0	0.28	0.58839		GO:0005290	L-histidine transmembrane transporter activity	8	2	0.58	0.1501		GO:0072329	monocarboxylic acid catabolic process	99	18	6.8	0.96228		GO:0000126
GO:0052548	regulation of endopeptidase activity	151	6	3.63	0.04675		GO:0032797	SMN complex	3	0	0.08	0.25414		GO:0003955	NAD(P)H dehydrogenase (quinone) activity	22	0	0.53	0.9413		GO:0044247	cellular polysaccharide catabolic process	114	17	7.91	0.38151		GO:0097545	axonemal outer doublet	4	0	0.28	0.58839		GO:0005292	high-affinity lysine transmembrane transporter activity	4	2	0.29	0.22637		GO:0031401	positive regulation of protein modification process	326	18	22.39	0.96649		GO:0005642
GO:0010466	negative regulation of peptidase activity	145	6	3.48	0.0502		GO:0032806	carboxy-terminal domain protein kinase complex	6	0	0.15	0.79756		GO:0003958	NADPH-hemoprotein reductase activity	16	0	0.38	0.49871		GO:0033014	tetrapyrrole biosynthetic process	217	17	15.07	0.35829		GO:0005879	axonemal microtubule	4	0	0.28	0.58839		GO:0005338	nucleotide-sugar transmembrane transporter activity	23	2	1.66	0.17121		GO:0042538	hyperosmotic salinity response	105	17	7.21	0.00793		GO:0005721
GO:0051606	detection of stimulus	244	6	5.86	0.05208		GO:0032807	DNA ligase IV complex	6	0	0.15	0.996		GO:0003959	NADPH dehydrogenase activity	8	0	0.19	0.3674		GO:0016570	histone modification	542	17	37.63	0.90345		GO:0044352	pinosome	5	0	0.35	0.58904		GO:0005451	monovalent cation:proton antiporter activity	38	2	2.75	0.05701		GO:0009825	multidimensional cell growth	81	17	5.56	0.0345		GO:0005953
GO:0010044	response to aluminum ion	40	6	0.96	0.06602		GO:0032982	myosin filament	6	0	0.15	0.87983		GO:0003960	NADPH:quinone reductase activity	2	0	0.05	0.36741		GO:0016569	covalent chromatin modification	555	17	38.53	0.95241		GO:0044354	macropinosome	5	0	0.35	0.58904		GO:0008066	glutamate receptor activity	43	2	3.11	0.23713		GO:0006935	chemotaxis	115	17	7.9	0.15373		GO:0030904
GO:0010951	negative regulation of endopeptidase activity	141	6	3.39	0.0687		GO:0033017	sarcoplasmic reticulum membrane	7	0	0.18	0.12862		GO:0003962	cystathionine gamma-synthase activity	7	0	0.17	0.29593		GO:0015074	DNA integration	319	17	22.15	0.99999		GO:0031618	nuclear pericentric heterochromatin	1	0	0.07	0.58927		GO:0008175	tRNA methyltransferase activity	60	2	4.34	0.66197		GO:0042330	taxis	115	17	7.9	0.15373		GO:0031597
GO:0009268	response to pH	48	6	1.15	0.07684		GO:0033061	DNA recombinase mediator complex	11	0	0.28	0.87609		GO:0003972	RNA ligase (ATP) activity	9	0	0.22	0.54537		GO:0010286	heat acclimation	106	17	7.36	0.05566		GO:0090577	RNA polymerase IV transcription factor complex	1	0	0.07	0.58927		GO:0008177	succinate dehydrogenase (ubiquinone) activity	7	2	0.51	0.39244		GO:0051783	regulation of nuclear division	164	17	11.26	0.29363		GO:0019008
GO:0052482	defense response by cell wall thickening	86	6	2.07	0.07951		GO:0033063	Rad51B-Rad51C-Rad51D-XRCC2 complex	11	0	0.28	0.87609		GO:0003973	(S)-2-hydroxy-acid oxidase activity	11	0	0.26	0.01676		GO:0010102	lateral root morphogenesis	159	17	11.04	0.34394		GO:0008541	proteasome regulatory particle, lid subcomplex	29	0	2.02	0.59548		GO:0008184	glycogen phosphorylase activity	8	2	0.58	0.00496		GO:0005984	disaccharide metabolic process	190	17	13.05	0.31625		GO:0009539
GO:0052544	defense response by callose deposition in cell wall	86	6	2.07	0.07951		GO:0033095	aleurone grain	25	0	0.63	0.4274		GO:0003975	UDP-N-acetylglucosamine-dolichyl-phosphate N-acetylglucosaminephosphotransferase activity	4	0	0.1	0.02291		GO:0010101	post-embryonic root morphogenesis	166	17	11.52	0.38878		GO:0010445	nuclear dicing body	11	0	0.77	0.59645		GO:0008235	metalloexopeptidase activity	52	2	3.76	0.03988		GO:0060918	auxin transport	246	17	16.89	0.32233		GO:0000814
GO:1903318	negative regulation of protein maturation	168	6	4.04	0.08488		GO:0033106	cis-Golgi network membrane	1	0	0.03	0.28279		GO:0003978	UDP-glucose 4-epimerase activity	14	0	0.33	0.98999		GO:0010051	xylem and phloem pattern formation	162	17	11.25	0.44284		GO:0031428	box C/D snoRNP complex	12	0	0.83	0.59901		GO:0008239	dipeptidyl-peptidase activity	10	2	0.72	0.00854		GO:0000075	cell cycle checkpoint	164	17	11.26	0.35963		GO:0022625
GO:0045861	negative regulation of proteolysis	168	6	4.04	0.08488		GO:0033116	endoplasmic reticulum-Golgi intermediate compartment membrane	5	0	0.13	0.02601		GO:0003979	UDP-glucose 6-dehydrogenase activity	5	0	0.12	0.45057		GO:0009682	induced systemic resistance	67	17	4.65	0.0084		GO:0048786	presynaptic active zone	5	0	0.35	0.60155		GO:0008330	protein tyrosine/threonine phosphatase activity	8	2	0.58	0.08076		GO:0032392	DNA geometric change	134	17	9.2	0.46244		GO:0034045
GO:0010955	negative regulation of protein processing	168	6	4.04	0.08488		GO:0033178	proton-transporting two-sector ATPase complex, catalytic domain	96	0	2.41	0.89146		GO:0003980	UDP-glucose:glycoprotein glucosyltransferase activity	4	0	0.1	0.71166		GO:0009627	systemic acquired resistance	206	17	14.3	0.05078		GO:0070603	SWI/SNF superfamily-type complex	93	0	6.47	0.60159		GO:0008381	mechanically-gated ion channel activity	50	2	3.62	0.02372		GO:0009064	glutamine family amino acid metabolic process	192	17	13.18	0.46339		GO:0015934
GO:0018958	phenol-containing compound metabolic process	107	6	2.57	0.1093		GO:0033180	proton-transporting V-type ATPase, V1 domain	17	0	0.43	0.87081		GO:0003983	UTP:glucose-1-phosphate uridylyltransferase activity	16	0	0.38	0.39608		GO:0009251	glucan catabolic process	119	17	8.26	0.20838		GO:0005771	multivesicular body	41	0	2.85	0.60289		GO:0008490	arsenite secondary active transmembrane transporter activity	13	2	0.94	1		GO:0048645	organ formation	217	17	14.9	0.46801		GO:0000327
GO:0009625	response to insect	103	6	2.47	0.11571		GO:0033185	dolichol-phosphate-mannose synthase complex	3	0	0.08	0.80988		GO:0003984	acetolactate synthase activity	4	0	0.1	0.84955		GO:0009165	nucleotide biosynthetic process	599	17	41.59	0.85788		GO:0005642	annulate lamellae	2	0	0.14	0.60343		GO:0008725	DNA-3-methyladenine glycosylase activity	26	2	1.88	0.43169		GO:0018958	phenol-containing compound metabolic process	107	17	7.35	0.49057		GO:0030134
GO:0006575	cellular modified amino acid metabolic process	303	6	7.28	0.1184		GO:0033186	CAF-1 complex	3	0	0.08	0.5044		GO:0003985	acetyl-CoA C-acetyltransferase activity	9	0	0.22	0.29928		GO:0009064	glutamine family amino acid metabolic process	192	17	13.33	0.30624		GO:0005721	pericentric heterochromatin	4	0	0.28	0.6047		GO:0008734	L-aspartate oxidase activity	4	2	0.29	0.17066		GO:0008654	phospholipid biosynthetic process	306	17	21.01	0.50221		GO:0012507
GO:0010447	response to acidic pH	37	6	0.89	0.13246		GO:0033202	DNA helicase complex	45	0	1.13	0.56288		GO:0003987	acetate-CoA ligase activity	7	0	0.17	0.5129		GO:0007178	transmembrane receptor protein serine/threonine kinase signaling pathway	245	17	17.01	0.13861		GO:0005953	CAAX-protein geranylgeranyltransferase complex	4	0	0.28	0.60755		GO:0008843	endochitinase activity	3	2	0.22	0.10213		GO:0042325	regulation of phosphorylation	296	17	20.33	0.58311		GO:0043625
GO:0010229	inflorescence development	59	6	1.42	0.14141		GO:0033263	CORVET complex	23	0	0.58	0.07404		GO:0003988	acetyl-CoA C-acyltransferase activity	12	0	0.29	0.4773		GO:0006650	glycerophospholipid metabolic process	405	17	28.12	0.2464		GO:0030904	retromer complex	27	0	1.88	0.60871		GO:0008905	mannose-phosphate guanylyltransferase activity	7	2	0.51	0.522		GO:0022613	ribonucleoprotein complex biogenesis	992	17	68.12	0.60296		GO:0000802
GO:0071365	cellular response to auxin stimulus	396	6	9.51	0.14384		GO:0033267	axon part	16	0	0.4	0.31223		GO:0003991	acetylglutamate kinase activity	4	0	0.1	0.59758		GO:0006534	cysteine metabolic process	74	17	5.14	0.3946		GO:0031597	cytosolic proteasome complex	18	0	1.25	0.61102		GO:0008928	mannose-1-phosphate guanylyltransferase (GDP) activity	3	2	0.22	0.11831		GO:0006913	nucleocytoplasmic transport	351	17	24.1	0.68313		GO:0005640
GO:0052543	callose deposition in cell wall	108	6	2.59	0.17714		GO:0033268	node of Ranvier	6	0	0.15	0.36276		GO:0003992	N2-acetyl-L-ornithine:2-oxoglutarate 5-aminotransferase activity	3	0	0.07	0.5917		GO:0006306	DNA methylation	210	17	14.58	0.44672		GO:0019008	molybdopterin synthase complex	4	0	0.28	0.61229		GO:0009008	DNA-methyltransferase activity	17	2	1.23	0.0174		GO:0051169	nuclear transport	351	17	24.1	0.68313		GO:0033290
GO:0033273	response to vitamin	39	6	0.94	0.17785		GO:0033276	transcription factor TFTC complex	8	0	0.2	0.42775		GO:0003994	aconitate hydratase activity	12	0	0.29	0.64814		GO:0006305	DNA alkylation	210	17	14.58	0.44672		GO:0097255	R2TP complex	20	0	1.39	0.6128		GO:0009674	potassium:sodium symporter activity	13	2	0.94	0.8023		GO:1900542	regulation of purine nucleotide metabolic process	179	17	12.29	0.76925		GO:0005937
GO:0009734	auxin-activated signaling pathway	349	6	8.38	0.18858		GO:0033290	eukaryotic 48S preinitiation complex	42	0	1.05	0.54773		GO:0003995	acyl-CoA dehydrogenase activity	5	0	0.12	0.02577		GO:0006140	regulation of nucleotide metabolic process	179	17	12.43	0.77278		GO:0009539	photosystem II reaction center	2	0	0.14	0.61305		GO:0009702	L-arabinokinase activity	6	2	0.43	0.16329		GO:0006140	regulation of nucleotide metabolic process	179	17	12.29	0.76925		GO:0043332
GO:0019827	stem cell maintenance	123	6	2.95	0.19024		GO:0033557	Slx1-Slx4 complex	4	0	0.1	0.77394		GO:0003996	acyl-CoA ligase activity	6	0	0.14	0.76418		GO:0000281	mitotic cytokinesis	205	17	14.23	0.34513		GO:0000814	ESCRT II complex	12	0	0.83	0.61569		GO:0009703	nitrate reductase (NADH) activity	2	2	0.14	0.02973		GO:0006275	regulation of DNA replication	187	17	12.84	0.80513		GO:0016282
GO:0052386	cell wall thickening	111	6	2.67	0.21664		GO:0033588	Elongator holoenzyme complex	18	0	0.45	0.41806		GO:0003997	acyl-CoA oxidase activity	14	0	0.33	0.82276		GO:0000209	protein polyubiquitination	319	17	22.15	0.98306		GO:0034045	pre-autophagosomal structure membrane	25	0	1.74	0.62254		GO:0009815	1-aminocyclopropane-1-carboxylate oxidase activity	9	2	0.65	0.03601		GO:0072594	establishment of protein localization to organelle	621	17	42.64	0.89556		GO:0044665
GO:0048193	Golgi vesicle transport	466	6	11.19	0.21727		GO:0033593	BRCA2-MAGE-D1 complex	3	0	0.08	0.23002		GO:0003998	acylphosphatase activity	2	0	0.05	0.46763		GO:1901658	glycosyl compound catabolic process	188	16	13.05	0.91114		GO:0000327	lytic vacuole within protein storage vacuole	8	0	0.56	0.62347		GO:0010295	(+)-abscisic acid 8'-hydroxylase activity	2	2	0.14	0.02875		GO:0033044	regulation of chromosome organization	340	17	23.35	0.97937		GO:0071339
GO:0007267	cell-cell signaling	282	6	6.77	0.22474		GO:0033597	mitotic checkpoint complex	8	0	0.2	0.68546		GO:0003999	adenine phosphoribosyltransferase activity	17	0	0.41	0.93761		GO:1901652	response to peptide	36	16	2.5	0.85811		GO:0070451	cell hair	4	0	0.28	0.62363		GO:0010471	GDP-galactose:mannose-1-phosphate guanylyltransferase activity	3	2	0.22	0.11831		GO:0051275	beta-glucan catabolic process	59	17	4.05	1		GO:0043202
GO:0051604	protein maturation	474	6	11.39	0.27656		GO:0033644	host cell membrane	21	0	0.53	0.39152		GO:0004000	adenosine deaminase activity	11	0	0.26	0.84983		GO:0098586	cellular response to virus	78	16	5.42	0.22673		GO:0043625	delta DNA polymerase complex	2	0	0.14	0.62716		GO:0010472	GDP-galactose:glucose-1-phosphate guanylyltransferase activity	3	2	0.22	0.11831		GO:0045471	response to ethanol	20	16	1.37	2.4e-10		GO:0000930
GO:2000117	negative regulation of cysteine-type endopeptidase activity	51	6	1.23	0.30112		GO:0034066	RIC1-RGP1 guanyl-nucleotide exchange factor complex	1	0	0.03	0.43381		GO:0004001	adenosine kinase activity	9	0	0.22	0.58566		GO:0071322	cellular response to carbohydrate stimulus	183	16	12.7	0.39325		GO:0032133	chromosome passenger complex	5	0	0.35	0.62725		GO:0010473	GDP-galactose:myoinositol-1-phosphate guanylyltransferase activity	3	2	0.22	0.11831		GO:0006032	chitin catabolic process	56	16	3.85	0.00455		GO:0031234
GO:0046189	phenol-containing compound biosynthetic process	59	6	1.42	0.30177		GO:0034098	Cdc48p-Npl4p-Ufd1p AAA ATPase complex	7	0	0.18	0.10404		GO:0004003	ATP-dependent DNA helicase activity	63	0	1.51	0.69875		GO:0071281	cellular response to iron ion	99	16	6.87	0.13208		GO:0030134	ER to Golgi transport vesicle	47	0	3.27	0.62796		GO:0010474	glucose-1-phosphate guanylyltransferase (GDP) activity	3	2	0.22	0.11831		GO:0000819	sister chromatid segregation	181	16	12.43	0.00632		GO:0005761
GO:0045488	pectin metabolic process	261	6	6.27	0.3381		GO:0034245	mitochondrial DNA-directed RNA polymerase complex	13	0	0.33	0.47581		GO:0004004	ATP-dependent RNA helicase activity	202	0	4.83	0.26816		GO:0070301	cellular response to hydrogen peroxide	243	16	16.87	0.28128		GO:0012507	ER to Golgi transport vesicle membrane	47	0	3.27	0.62796		GO:0010475	galactose-1-phosphate guanylyltransferase (GDP) activity	3	2	0.22	0.11831		GO:0030705	cytoskeleton-dependent intracellular transport	40	16	2.75	0.00639		GO:0009547
GO:0006470	protein dephosphorylation	221	6	5.31	0.37298		GO:0034271	phosphatidylinositol 3-kinase complex I	4	0	0.1	0.63054		GO:0004013	adenosylhomocysteinase activity	3	0	0.07	0.396		GO:0061077	chaperone-mediated protein folding	108	16	7.5	0.08642		GO:0000802	transverse filament	2	0	0.14	0.62875		GO:0015129	lactate transmembrane transporter activity	3	2	0.22	0.1066		GO:0043269	regulation of ion transport	259	16	17.79	0.0135		GO:0005797
GO:0016485	protein processing	421	6	10.11	0.37792		GO:0034272	phosphatidylinositol 3-kinase complex II	4	0	0.1	0.63054		GO:0004014	adenosylmethionine decarboxylase activity	11	0	0.26	0.71904		GO:0051345	positive regulation of hydrolase activity	172	16	11.94	0.74144		GO:0033202	DNA helicase complex	45	0	3.13	0.62903		GO:0015165	pyrimidine nucleotide-sugar transmembrane transporter activity	22	2	1.59	0.20444		GO:0042548	regulation of photosynthesis, light reaction	68	16	4.67	0.01634		GO:0031302
GO:1903317	regulation of protein maturation	255	6	6.13	0.38942		GO:0034274	Atg12-Atg5-Atg16 complex	7	0	0.18	0.7327		GO:0004015	adenosylmethionine-8-amino-7-oxononanoate transaminase activity	4	0	0.1	0.9008		GO:0051193	regulation of cofactor metabolic process	180	16	12.5	0.34216		GO:1902554	serine/threonine protein kinase complex	48	0	3.34	0.63144		GO:0015174	basic amino acid transmembrane transporter activity	13	2	0.94	0.04587		GO:0043467	regulation of generation of precursor metabolites and energy	76	16	5.22	0.03399		GO:0031303
GO:0070613	regulation of protein processing	255	6	6.13	0.38942		GO:0034388	Pwp2p-containing subcomplex of 90S preribosome	25	0	0.63	0.75315		GO:0004016	adenylate cyclase activity	40	0	0.96	0.00938		GO:0051187	cofactor catabolic process	82	16	5.69	0.06969		GO:0005640	nuclear outer membrane	4	0	0.28	0.63318		GO:0015181	arginine transmembrane transporter activity	9	2	0.65	0.11842		GO:0010109	regulation of photosynthesis	99	16	6.8	0.0382		GO:0005689
GO:0048864	stem cell development	145	6	3.48	0.39981		GO:0034399	nuclear periphery	48	0	1.2	0.21459		GO:0004017	adenylate kinase activity	39	0	0.93	0.90592		GO:0051168	nuclear export	196	16	13.61	0.45925		GO:0005937	mating projection	6	0	0.42	0.6375		GO:0015189	L-lysine transmembrane transporter activity	9	2	0.65	0.11842		GO:0031400	negative regulation of protein modification process	163	16	11.19	0.04197		GO:0005673
GO:0048863	stem cell differentiation	162	6	3.89	0.40246		GO:0034425	etioplast envelope	8	0	0.2	0.62499		GO:0004018	N6-(1,2-dicarboxyethyl)AMP AMP-lyase (fumarate-forming) activity	11	0	0.26	0.52981		GO:0046496	nicotinamide nucleotide metabolic process	198	16	13.75	0.88028		GO:0043332	mating projection tip	6	0	0.42	0.6375		GO:0015227	acyl carnitine transmembrane transporter activity	4	2	0.29	0.22637		GO:0098727	maintenance of cell number	101	16	6.94	0.05813		GO:0043660
GO:0010029	regulation of seed germination	212	6	5.09	0.46667		GO:0034426	etioplast membrane	8	0	0.2	0.62499		GO:0004019	adenylosuccinate synthase activity	4	0	0.1	0.2062		GO:0046130	purine ribonucleoside catabolic process	171	16	11.87	0.86411		GO:0043202	lysosomal lumen	15	0	1.04	0.63758		GO:0015370	solute:sodium symporter activity	7	2	0.51	0.18356		GO:0045089	positive regulation of innate immune response	179	16	12.29	0.08313		GO:0043661
GO:0045596	negative regulation of cell differentiation	205	6	4.92	0.48355		GO:0034455	t-UTP complex	3	0	0.08	0.38349		GO:0004020	adenylylsulfate kinase activity	14	0	0.33	0.78139		GO:0045490	pectin catabolic process	143	16	9.93	0.25559		GO:0033290	eukaryotic 48S preinitiation complex	42	0	2.92	0.63821		GO:0015385	sodium:proton antiporter activity	29	2	2.1	0.08395		GO:0009073	aromatic amino acid family biosynthetic process	141	16	9.68	0.09756		GO:0043659
GO:2000116	regulation of cysteine-type endopeptidase activity	61	6	1.47	0.48563		GO:0034457	Mpp10 complex	10	0	0.25	0.51644		GO:0004021	L-alanine:2-oxoglutarate aminotransferase activity	3	0	0.07	0.98491		GO:0043562	cellular response to nitrogen levels	64	16	4.44	0.00401		GO:0000930	gamma-tubulin complex	18	0	1.25	0.63882		GO:0015446	arsenite-transmembrane transporting ATPase activity	13	2	0.94	0.00951		GO:0050778	positive regulation of immune response	184	16	12.64	0.10975		GO:0002189
GO:0034440	lipid oxidation	110	6	2.64	0.48981		GO:0034515	proteasome storage granule	3	0	0.08	0.55476		GO:0004022	alcohol dehydrogenase (NAD) activity	14	0	0.33	0.01221		GO:0043434	response to peptide hormone	30	16	2.08	0.58889		GO:0005797	Golgi medial cisterna	5	0	0.35	0.63883		GO:0015491	cation:cation antiporter activity	60	2	4.34	0.06542		GO:0006890	retrograde vesicle-mediated transport, Golgi to ER	100	16	6.87	0.13457		GO:0009513
GO:0009850	auxin metabolic process	119	6	2.86	0.51592		GO:0034518	RNA cap binding complex	13	0	0.33	0.80517		GO:0004024	alcohol dehydrogenase activity, zinc-dependent	2	0	0.05	0.81553		GO:0042744	hydrogen peroxide catabolic process	226	16	15.69	0.00349		GO:0044665	MLL1/2 complex	21	0	1.46	0.6393		GO:0015616	DNA translocase activity	11	2	0.8	0.03538		GO:0015995	chlorophyll biosynthetic process	135	16	9.27	0.15107		GO:0034425
GO:0010393	galacturonan metabolic process	273	6	6.56	0.52503		GO:0034657	GID complex	8	0	0.2	0.74103		GO:0004028	3-chloroallyl aldehyde dehydrogenase activity	2	0	0.05	0.24864		GO:0042743	hydrogen peroxide metabolic process	265	16	18.4	0.03217		GO:0071339	MLL1 complex	21	0	1.46	0.6393		GO:0015651	quaternary ammonium group transmembrane transporter activity	4	2	0.29	0.22637		GO:0031123	RNA 3'-end processing	309	16	21.22	0.15281		GO:0034426
GO:1900140	regulation of seedling development	213	6	5.12	0.52658		GO:0034663	endoplasmic reticulum chaperone complex	10	0	0.25	0.77766		GO:0004030	aldehyde dehydrogenase [NAD(P)+] activity	9	0	0.22	0.94924		GO:0042454	ribonucleoside catabolic process	175	16	12.15	0.85788		GO:0031234	extrinsic component of cytoplasmic side of plasma membrane	19	0	1.32	0.64		GO:0015922	aspartate oxidase activity	4	2	0.29	0.17066		GO:0002684	positive regulation of immune system process	209	16	14.35	0.15535		GO:0005787
GO:0010073	meristem maintenance	300	6	7.21	0.60627		GO:0034702	ion channel complex	1	0	0.03	0.28726		GO:0004031	aldehyde oxidase activity	4	0	0.1	0.05893		GO:0034248	regulation of cellular amide metabolic process	257	16	17.84	0.44256		GO:0031302	intrinsic component of endosome membrane	2	0	0.14	0.64014		GO:0015930	glutamate synthase activity	31	2	2.24	0.12736		GO:0043455	regulation of secondary metabolic process	117	16	8.03	0.20985		GO:0034271
GO:0009832	plant-type cell wall biogenesis	274	6	6.58	0.62299		GO:0034703	cation channel complex	1	0	0.03	0.28726		GO:0004032	alditol:NADP+ 1-oxidoreductase activity	2	0	0.05	0.53297		GO:0033121	regulation of purine nucleotide catabolic process	166	16	11.52	0.8002		GO:0031303	integral component of endosome membrane	2	0	0.14	0.64014		GO:0016040	glutamate synthase (NADH) activity	23	2	1.66	3.6e-05		GO:0006040	amino sugar metabolic process	83	16	5.7	0.21748		GO:0034272
GO:0007584	response to nutrient	95	6	2.28	0.63487		GO:0034704	calcium channel complex	1	0	0.03	0.28726		GO:0004034	aldose 1-epimerase activity	15	0	0.36	0.87298		GO:0031123	RNA 3'-end processing	309	16	21.45	0.19461		GO:0016282	eukaryotic 43S preinitiation complex	37	0	2.57	0.64028		GO:0016307	phosphatidylinositol phosphate kinase activity	28	2	2.03	0.18297		GO:0045927	positive regulation of growth	143	16	9.82	0.23371		GO:0071561
GO:0006563	L-serine metabolic process	96	6	2.31	0.66819		GO:0034708	methyltransferase complex	50	0	1.25	0.97591		GO:0004038	allantoinase activity	4	0	0.1	0.98932		GO:0030811	regulation of nucleotide catabolic process	171	16	11.87	0.78957		GO:0009547	plastid ribosome	18	0	1.25	0.64098		GO:0016308	1-phosphatidylinositol-4-phosphate 5-kinase activity	16	2	1.16	0.08297		GO:0009308	amine metabolic process	328	16	22.52	0.26519		GO:0031314
GO:0009070	serine family amino acid biosynthetic process	103	6	2.47	0.71733		GO:0034715	pICln-Sm protein complex	6	0	0.15	0.07502		GO:0004040	amidase activity	4	0	0.1	0.70419		GO:0022900	electron transport chain	254	16	17.63	0.20282		GO:0005761	mitochondrial ribosome	19	0	1.32	0.64205		GO:0016408	C-acyltransferase activity	32	2	2.32	0.84261		GO:0045859	regulation of protein kinase activity	209	16	14.35	0.27105		GO:0005832
GO:0051274	beta-glucan biosynthetic process	217	6	5.21	0.74318		GO:0034719	SMN-Sm protein complex	9	0	0.23	0.02982		GO:0004042	acetyl-CoA:L-glutamate N-acetyltransferase activity	8	0	0.19	0.57625		GO:0019362	pyridine nucleotide metabolic process	201	16	13.95	0.89086		GO:0005689	U12-type spliceosomal complex	35	0	2.43	0.64746		GO:0016453	C-acetyltransferase activity	9	2	0.65	0.15087		GO:1901990	regulation of mitotic cell cycle phase transition	170	16	11.67	0.2747		GO:0030870
GO:0009581	detection of external stimulus	141	6	3.39	0.74638		GO:0034998	oligosaccharyltransferase I complex	1	0	0.03	0.99964		GO:0004043	L-aminoadipate-semialdehyde dehydrogenase activity	4	0	0.1	0.98322		GO:0019344	cysteine biosynthetic process	51	16	3.54	0.40373		GO:0005673	transcription factor TFIIE complex	7	0	0.49	0.64756		GO:0016530	metallochaperone activity	17	2	1.23	0.49727		GO:1901987	regulation of cell cycle phase transition	182	16	12.5	0.28481		GO:0043680
GO:0009582	detection of abiotic stimulus	141	6	3.39	0.74638		GO:0035032	phosphatidylinositol 3-kinase complex, class III	10	0	0.25	0.67532		GO:0004044	amidophosphoribosyltransferase activity	49	0	1.17	0.25508		GO:0015980	energy derivation by oxidation of organic compounds	344	16	23.88	0.70645		GO:0002189	ribose phosphate diphosphokinase complex	1	0	0.07	0.65016		GO:0016621	cinnamoyl-CoA reductase activity	15	2	1.09	0.01884		GO:0043549	regulation of kinase activity	227	16	15.59	0.35307		GO:0005656
GO:0010090	trichome morphogenesis	185	6	4.44	0.75555		GO:0035061	interchromatin granule	3	0	0.08	0.24037		GO:0004045	aminoacyl-tRNA hydrolase activity	33	0	0.79	0.48737		GO:0010039	response to iron ion	111	16	7.71	0.22036		GO:0009513	etioplast	8	0	0.56	0.65325		GO:0016639	oxidoreductase activity, acting on the CH-NH2 group of donors, NAD or NADP as acceptor	35	2	2.53	0.24997		GO:1901071	glucosamine-containing compound metabolic process	59	16	4.05	0.40958		GO:0036387
GO:0009640	photomorphogenesis	148	6	3.56	0.77598		GO:0035097	histone methyltransferase complex	26	0	0.65	0.99996		GO:0004046	aminoacylase activity	10	0	0.24	0.48682		GO:0010017	red or far-red light signaling pathway	110	16	7.64	0.20605		GO:0034425	etioplast envelope	8	0	0.56	0.65325		GO:0016688	L-ascorbate peroxidase activity	15	2	1.09	0.18621		GO:0008643	carbohydrate transport	248	16	17.03	0.41559		GO:0034457
GO:0010608	posttranscriptional regulation of gene expression	709	6	17.03	0.79271		GO:0035098	ESC/E(Z) complex	4	0	0.1	0.99999		GO:0004047	aminomethyltransferase activity	5	0	0.12	0.02419		GO:0009261	ribonucleotide catabolic process	166	16	11.52	0.8002		GO:0034426	etioplast membrane	8	0	0.56	0.65325		GO:0016780	phosphotransferase activity, for other substituted phosphate groups	46	2	3.33	0.29652		GO:0006402	mRNA catabolic process	383	16	26.3	0.46984		GO:0061617
GO:0009250	glucan biosynthetic process	320	6	7.69	0.79441		GO:0035101	FACT complex	16	0	0.4	0.10892		GO:0004048	anthranilate phosphoribosyltransferase activity	7	0	0.17	0.11713		GO:0009207	purine ribonucleoside triphosphate catabolic process	166	16	11.52	0.8002		GO:0009898	cytoplasmic side of plasma membrane	31	0	2.16	0.65663		GO:0016854	racemase and epimerase activity	97	2	7.02	0.99653		GO:0001932	regulation of protein phosphorylation	249	16	17.1	0.52255		GO:0005763
GO:0009069	serine family amino acid metabolic process	152	6	3.65	0.8526		GO:0035102	PRC1 complex	12	0	0.3	0.79283		GO:0004049	anthranilate synthase activity	10	0	0.24	0.05237		GO:0009203	ribonucleoside triphosphate catabolic process	166	16	11.52	0.8002		GO:0034271	phosphatidylinositol 3-kinase complex I	4	0	0.28	0.65764		GO:0016892	endoribonuclease activity, producing 3'-phosphomonoesters	68	2	4.92	0.46952		GO:0010374	stomatal complex development	148	16	10.16	0.54259		GO:0071458
GO:0071489	cellular response to red or far red light	133	6	3.2	0.8586		GO:0035145	exon-exon junction complex	12	0	0.3	0.49115		GO:0004053	arginase activity	2	0	0.05	0.92527		GO:0009164	nucleoside catabolic process	175	16	12.15	0.85788		GO:0034272	phosphatidylinositol 3-kinase complex II	4	0	0.28	0.65764		GO:0016894	endonuclease activity, active with either ribo- or deoxyribonucleic acids and producing 3'-phosphomonoesters	112	2	8.1	0.64726		GO:0006022	aminoglycan metabolic process	57	16	3.91	0.61449		GO:0036452
GO:0005996	monosaccharide metabolic process	531	6	12.76	0.92041		GO:0035267	NuA4 histone acetyltransferase complex	32	0	0.8	0.73902		GO:0004055	argininosuccinate synthase activity	11	0	0.26	0.2536		GO:0009154	purine ribonucleotide catabolic process	166	16	11.52	0.8002		GO:0071561	nucleus-vacuole junction	4	0	0.28	0.65764		GO:0016905	myosin heavy chain kinase activity	14	2	1.01	0.45739		GO:0051345	positive regulation of hydrolase activity	172	16	11.81	0.73521		GO:0000936
GO:0007015	actin filament organization	241	6	5.79	0.92532		GO:0035327	transcriptionally active chromatin	41	0	1.03	0.48527		GO:0004056	argininosuccinate lyase activity	10	0	0.24	0.30248		GO:0009146	purine nucleoside triphosphate catabolic process	168	16	11.66	0.79594		GO:0005787	signal peptidase complex	28	0	1.95	0.65773		GO:0017069	snRNA binding	79	2	5.72	0.51804		GO:0071897	DNA biosynthetic process	176	16	12.09	0.74449		GO:0044457
GO:0006605	protein targeting	650	6	15.62	0.93277		GO:0035371	microtubule plus-end	9	0	0.23	0.06396		GO:0004057	arginyltransferase activity	5	0	0.12	0.52115		GO:0009118	regulation of nucleoside metabolic process	174	16	12.08	0.78324		GO:0031314	extrinsic component of mitochondrial inner membrane	19	0	1.32	0.65784		GO:0017137	Rab GTPase binding	78	2	5.64	0.87488		GO:0006195	purine nucleotide catabolic process	176	16	12.09	0.77558		GO:0043187
GO:0019318	hexose metabolic process	414	6	9.95	0.96818		GO:0035452	extrinsic component of plastid membrane	3	0	0.08	0.19007		GO:0004058	aromatic-L-amino-acid decarboxylase activity	1	0	0.02	0.9985		GO:0008643	carbohydrate transport	248	16	17.22	0.2399		GO:0005832	chaperonin-containing T-complex	15	0	1.04	0.65941		GO:0019843	rRNA binding	236	2	17.07	0.45213		GO:0009118	regulation of nucleoside metabolic process	174	16	11.95	0.77982		GO:0030964
GO:0042343	indole glucosinolate metabolic process	25	6	0.6	0.96862		GO:0035577	azurophil granule membrane	4	0	0.1	0.99696		GO:0004059	aralkylamine N-acetyltransferase activity	1	0	0.02	0.29619		GO:0006826	iron ion transport	43	16	2.99	0.18935		GO:0030672	synaptic vesicle membrane	17	0	1.18	0.66055		GO:0022820	potassium ion symporter activity	13	2	0.94	0.8023		GO:0030811	regulation of nucleotide catabolic process	171	16	11.74	0.78622		GO:0005747
GO:0006863	purine nucleobase transport	44	5	1.06	0.00013		GO:0035578	azurophil granule lumen	4	0	0.1	0.45317		GO:0004061	arylformamidase activity	5	0	0.12	0.28814		GO:0006417	regulation of translation	302	16	20.97	0.90429		GO:0008021	synaptic vesicle	17	0	1.18	0.66055		GO:0022833	mechanically gated channel activity	50	2	3.62	0.02372		GO:0009146	purine nucleoside triphosphate catabolic process	168	16	11.54	0.79265		GO:0045271
GO:0010271	regulation of chlorophyll catabolic process	18	5	0.43	0.00238		GO:0035579	specific granule membrane	5	0	0.13	0.1075		GO:0004064	arylesterase activity	10	0	0.24	0.97152		GO:0006402	mRNA catabolic process	383	16	26.59	0.55523		GO:0030870	Mre11 complex	10	0	0.7	0.66211		GO:0030235	nitric-oxide synthase regulator activity	2	2	0.14	0.02723		GO:0033121	regulation of purine nucleotide catabolic process	166	16	11.4	0.79696		GO:0017086
GO:0080037	negative regulation of cytokinin-activated signaling pathway	21	5	0.5	0.00667		GO:0035618	root hair	11	0	0.28	0.68969		GO:0004066	asparagine synthase (glutamine-hydrolyzing) activity	18	0	0.43	0.82572		GO:0006302	double-strand break repair	291	16	20.2	0.91077		GO:0043680	filiform apparatus	7	0	0.49	0.66273		GO:0030276	clathrin binding	127	2	9.19	0.10982		GO:0009154	purine ribonucleotide catabolic process	166	16	11.4	0.79696		GO:0000274
GO:0009851	auxin biosynthetic process	74	5	1.78	0.01632		GO:0035619	root hair tip	11	0	0.28	0.68969		GO:0004067	asparaginase activity	8	0	0.19	0.36755		GO:0006195	purine nucleotide catabolic process	176	16	12.22	0.77905		GO:0005656	nuclear pre-replicative complex	7	0	0.49	0.66423		GO:0030507	spectrin binding	58	2	4.2	0.00647		GO:0009261	ribonucleotide catabolic process	166	16	11.4	0.79696		GO:0045265
GO:0015853	adenine transport	15	5	0.36	0.019		GO:0035649	Nrd1 complex	4	0	0.1	0.72751		GO:0004069	L-aspartate:2-oxoglutarate aminotransferase activity	12	0	0.29	0.98498		GO:0006152	purine nucleoside catabolic process	175	16	12.15	0.85788		GO:0036387	pre-replicative complex	7	0	0.49	0.66423		GO:0030619	U1 snRNA binding	38	2	2.75	0.31875		GO:0009203	ribonucleoside triphosphate catabolic process	166	16	11.4	0.79696		GO:0001650
GO:0015854	guanine transport	15	5	0.36	0.019		GO:0035658	Mon1-Ccz1 complex	7	0	0.18	0.21484		GO:0004072	aspartate kinase activity	20	0	0.48	0.74298		GO:0006075	(1->3)-beta-D-glucan biosynthetic process	59	16	4.1	4.3e-05		GO:0032432	actin filament bundle	12	0	0.83	0.66735		GO:0030955	potassium ion binding	70	2	5.06	0.52495		GO:0009207	purine ribonucleoside triphosphate catabolic process	166	16	11.4	0.79696		GO:0042597
GO:0090305	nucleic acid phosphodiester bond hydrolysis	1981	5	47.59	0.02327		GO:0035770	ribonucleoprotein granule	217	0	5.44	0.40715		GO:0004073	aspartate-semialdehyde dehydrogenase activity	3	0	0.07	0.76103		GO:0006006	glucose metabolic process	215	16	14.93	0.1809		GO:0061617	MICOS complex	6	0	0.42	0.66948		GO:0031420	alkali metal ion binding	70	2	5.06	0.52495		GO:0048469	cell maturation	205	16	14.08	0.80263		GO:0005700
GO:0010227	floral organ abscission	46	5	1.11	0.03013		GO:0035838	growing cell tip	34	0	0.85	0.3547		GO:0004075	biotin carboxylase activity	4	0	0.1	0.25745		GO:0003333	amino acid transmembrane transport	119	16	8.26	0.13783		GO:0034457	Mpp10 complex	10	0	0.7	0.67039		GO:0031683	G-protein beta/gamma-subunit complex binding	31	2	2.24	0.02006		GO:0046130	purine ribonucleoside catabolic process	171	16	11.74	0.86098		GO:0005885
GO:0072530	purine-containing compound transmembrane transport	65	5	1.56	0.03056		GO:0035839	non-growing cell tip	4	0	0.1	0.25817		GO:0004076	biotin synthase activity	4	0	0.1	0.14585		GO:0002253	activation of immune response	116	16	8.05	0.32613		GO:0005763	mitochondrial small ribosomal subunit	8	0	0.56	0.67135		GO:0032182	small conjugating protein binding	116	2	8.39	0.67354		GO:0010054	trichoblast differentiation	193	16	13.25	0.87716		GO:0055037
GO:0009451	RNA modification	1882	5	45.21	0.0425		GO:0035861	site of double-strand break	42	0	1.05	0.24863		GO:0004077	biotin-[acetyl-CoA-carboxylase] ligase activity	7	0	0.17	0.18392		GO:0002218	activation of innate immune response	114	16	7.91	0.26729		GO:0071458	integral component of cytoplasmic side of endoplasmic reticulum membrane	8	0	0.56	0.67221		GO:0033170	protein-DNA loading ATPase activity	24	2	1.74	0.02845		GO:0010053	root epidermal cell differentiation	204	16	14.01	0.91551		GO:0005845
GO:0009838	abscission	50	5	1.2	0.05746		GO:0035869	ciliary transition zone	11	0	0.28	0.72222		GO:0004078	biotin-[methylcrotonoyl-CoA-carboxylase] ligase activity	3	0	0.07	0.22674		GO:1901401	regulation of tetrapyrrole metabolic process	79	15	5.48	0.71804		GO:0000936	primary cell septum	4	0	0.28	0.67354		GO:0033549	MAP kinase phosphatase activity	10	2	0.72	0.04305		GO:0015074	DNA integration	319	16	21.91	0.99999		GO:0000408
GO:0051187	cofactor catabolic process	82	5	1.97	0.07978		GO:0035974	meiotic spindle pole body	1	0	0.03	0.18947		GO:0004080	biotin-[propionyl-CoA-carboxylase (ATP-hydrolyzing)] ligase activity	3	0	0.07	0.22674		GO:0090056	regulation of chlorophyll metabolic process	77	15	5.35	0.63687		GO:0044457	cell septum part	4	0	0.28	0.67354		GO:0033858	N-acetylgalactosamine kinase activity	5	2	0.36	0.07187		GO:0046348	amino sugar catabolic process	56	16	3.85	1		GO:0048555
GO:0034050	host programmed cell death induced by symbiont	204	5	4.9	0.09472		GO:0036019	endolysosome	6	0	0.15	0.81995		GO:0004081	bis(5'-nucleosyl)-tetraphosphatase (asymmetrical) activity	6	0	0.14	0.05687		GO:0080135	regulation of cellular response to stress	242	15	16.8	0.7145		GO:0043187	cell septum surface	4	0	0.28	0.67354		GO:0033897	ribonuclease T2 activity	65	2	4.7	0.49187		GO:1901072	glucosamine-containing compound catabolic process	56	16	3.85	1		GO:0031253
GO:0009626	plant-type hypersensitive response	204	5	4.9	0.09472		GO:0036021	endolysosome lumen	6	0	0.15	0.81995		GO:0004084	branched-chain-amino-acid transaminase activity	13	0	0.31	0.89129		GO:0071236	cellular response to antibiotic	110	15	7.64	0.03653		GO:0017086	3-methyl-2-oxobutanoate dehydrogenase (lipoamide) complex	4	0	0.28	0.67908		GO:0035198	miRNA binding	12	2	0.87	0.72797		GO:0006026	aminoglycan catabolic process	56	16	3.85	1		GO:0005658
GO:0019722	calcium-mediated signaling	168	5	4.04	0.11519		GO:0036064	ciliary basal body	17	0	0.43	0.23597		GO:0004087	carbamoyl-phosphate synthase (ammonia) activity	1	0	0.02	0.93179		GO:0060416	response to growth hormone	18	15	1.25	6.8e-10		GO:0000274	mitochondrial proton-transporting ATP synthase, stator stalk	7	0	0.49	0.6799		GO:0035529	NADH pyrophosphatase activity	9	2	0.65	0.01568		GO:0006030	chitin metabolic process	56	16	3.85	1		GO:0009509
GO:0046890	regulation of lipid biosynthetic process	103	5	2.47	0.13266		GO:0036379	myofilament	2	0	0.05	0.23849		GO:0004088	carbamoyl-phosphate synthase (glutamine-hydrolyzing) activity	1	0	0.02	0.93179		GO:0051493	regulation of cytoskeleton organization	183	15	12.7	0.52531		GO:0045265	proton-transporting ATP synthase, stator stalk	7	0	0.49	0.6799		GO:0036310	annealing helicase activity	10	2	0.72	0.19491		GO:0009704	de-etiolation	39	15	2.68	0.00039		GO:0009380
GO:0031331	positive regulation of cellular catabolic process	177	5	4.25	0.16399		GO:0036387	pre-replicative complex	7	0	0.18	0.59872		GO:0004090	carbonyl reductase (NADPH) activity	1	0	0.02	0.75486		GO:0048469	cell maturation	205	15	14.23	0.93064		GO:0001650	fibrillar center	13	0	0.9	0.68082		GO:0042162	telomeric DNA binding	95	2	6.87	0.98069		GO:0046898	response to cycloheximide	44	15	3.02	0.00118		GO:0005947
GO:0009896	positive regulation of catabolic process	177	5	4.25	0.16399		GO:0036396	MIS complex	10	0	0.25	0.93197		GO:0004096	catalase activity	13	0	0.31	0.41161		GO:0046274	lignin catabolic process	98	15	6.8	0.04372		GO:0042597	periplasmic space	8	0	0.56	0.68177		GO:0043130	ubiquitin binding	116	2	8.39	0.67354		GO:0060992	response to fungicide	49	15	3.36	0.00321		GO:0030062
GO:0006694	steroid biosynthetic process	180	5	4.32	0.16516		GO:0036449	microtubule minus-end	4	0	0.1	0.89076		GO:0004097	catechol oxidase activity	25	0	0.6	0.23307		GO:0046271	phenylpropanoid catabolic process	106	15	7.36	0.00674		GO:0030964	NADH dehydrogenase complex	73	0	5.08	0.68196		GO:0043225	anion transmembrane-transporting ATPase activity	14	2	1.01	0.48907		GO:0043562	cellular response to nitrogen levels	64	15	4.39	0.00393		GO:0035032
GO:0080050	regulation of seed development	98	5	2.35	0.19213		GO:0036452	ESCRT complex	44	0	1.1	0.46957		GO:0004103	choline kinase activity	4	0	0.1	0.15178		GO:0045814	negative regulation of gene expression, epigenetic	289	15	20.06	0.80608		GO:0005747	mitochondrial respiratory chain complex I	73	0	5.08	0.68196		GO:0043515	kinetochore binding	7	2	0.51	0.30638		GO:1901654	response to ketone	55	15	3.78	0.00832		GO:0005942
GO:0016125	sterol metabolic process	163	5	3.92	0.19833		GO:0036464	cytoplasmic ribonucleoprotein granule	213	0	5.34	0.42765		GO:0004106	chorismate mutase activity	10	0	0.24	0.16572		GO:0043902	positive regulation of multi-organism process	109	15	7.57	0.08238		GO:0045271	respiratory chain complex I	73	0	5.08	0.68196		GO:0043733	DNA-3-methylbase glycosylase activity	26	2	1.88	0.43169		GO:0034293	sexual sporulation	54	15	3.71	0.01204		GO:0016605
GO:0016126	sterol biosynthetic process	79	5	1.9	0.21341		GO:0036477	somatodendritic compartment	24	0	0.6	0.56636		GO:0004107	chorismate synthase activity	4	0	0.1	0.56616		GO:0034470	ncRNA processing	885	15	61.44	0.89169		GO:0005700	polytene chromosome	8	0	0.56	0.68336		GO:0043813	phosphatidylinositol-3,5-bisphosphate 5-phosphatase activity	4	2	0.29	0.15677		GO:0071483	cellular response to blue light	84	15	5.77	0.01288		GO:0043209
GO:0044106	cellular amine metabolic process	181	5	4.35	0.25311		GO:0038201	TOR complex	10	0	0.25	0.32557		GO:0004108	citrate (Si)-synthase activity	2	0	0.05	0.66425		GO:0031124	mRNA 3'-end processing	216	15	15	0.03908		GO:0055037	recycling endosome	16	0	1.11	0.6926		GO:0044318	L-aspartate:fumarate oxidoreductase activity	4	2	0.29	0.17066		GO:0042435	indole-containing compound biosynthetic process	125	15	8.58	0.01471		GO:0098553
GO:0002213	defense response to insect	77	5	1.85	0.25343		GO:0042382	paraspeckles	2	0	0.05	0.36658		GO:0004109	coproporphyrinogen oxidase activity	3	0	0.07	0.75955		GO:0023014	signal transduction by phosphorylation	150	15	10.41	0.81308		GO:0000408	EKC/KEOPS complex	4	0	0.28	0.69275		GO:0044325	ion channel binding	67	2	4.85	0.00125		GO:0031124	mRNA 3'-end processing	216	15	14.83	0.02717		GO:0098576
GO:0009887	organ morphogenesis	492	5	11.82	0.26199		GO:0042383	sarcolemma	58	0	1.45	0.2671		GO:0004112	cyclic-nucleotide phosphodiesterase activity	3	0	0.07	0.75305		GO:0017038	protein import	339	15	23.54	0.87697		GO:0005845	mRNA cap binding complex	3	0	0.21	0.69295		GO:0044390	small protein conjugating enzyme binding	80	2	5.79	0.50944		GO:0030435	sporulation resulting in formation of a cellular spore	76	15	5.22	0.05187		GO:0071556
GO:0019932	second-messenger-mediated signaling	182	5	4.37	0.27812		GO:0042405	nuclear inclusion body	6	0	0.15	0.95395		GO:0004123	cystathionine gamma-lyase activity	4	0	0.1	0.21865		GO:0009832	plant-type cell wall biogenesis	274	15	19.02	0.63522		GO:0048555	generative cell nucleus	5	0	0.35	0.69845		GO:0045118	azole transporter activity	8	2	0.58	0.1501		GO:0043934	sporulation	76	15	5.22	0.05187		GO:0030690
GO:0048466	androecium development	157	5	3.77	0.2888		GO:0042406	extrinsic component of endoplasmic reticulum membrane	11	0	0.28	0.38056		GO:0004124	cysteine synthase activity	27	0	0.65	0.49694		GO:0009765	photosynthesis, light harvesting	100	15	6.94	0.02293		GO:0031253	cell projection membrane	5	0	0.35	0.69995		GO:0045159	myosin II binding	38	2	2.75	0.90747		GO:0006787	porphyrin-containing compound catabolic process	51	15	3.5	0.07298		GO:0030691
GO:0048443	stamen development	157	5	3.77	0.2888		GO:0042470	melanosome	1	0	0.03	0.20582		GO:0004126	cytidine deaminase activity	4	0	0.1	0.26474		GO:0009582	detection of abiotic stimulus	141	15	9.79	0.40637		GO:0005658	alpha DNA polymerase:primase complex	4	0	0.28	0.7043		GO:0045181	glutamate synthase activity, NAD(P)H as acceptor	23	2	1.66	1		GO:0033015	tetrapyrrole catabolic process	51	15	3.5	0.07298		GO:0030689
GO:0009583	detection of light stimulus	49	5	1.18	0.30076		GO:0042555	MCM complex	36	0	0.9	0.2862		GO:0004127	cytidylate kinase activity	10	0	0.24	0.26147		GO:0009581	detection of external stimulus	141	15	9.79	0.40637		GO:0009380	excinuclease repair complex	1	0	0.07	0.71231		GO:0045431	flavonol synthase activity	4	2	0.29	0.09379		GO:0071446	cellular response to salicylic acid stimulus	121	15	8.31	0.07342		GO:0071782
GO:0009615	response to virus	238	5	5.72	0.31144		GO:0042564	NLS-dependent protein nuclear import complex	9	0	0.23	0.25254		GO:0004128	cytochrome-b5 reductase activity, acting on NAD(P)H	7	0	0.17	0.38167		GO:0008654	phospholipid biosynthetic process	306	15	21.24	0.29208		GO:0009509	chromoplast	6	0	0.42	0.71281		GO:0045485	omega-6 fatty acid desaturase activity	15	2	1.09	0.00318		GO:0009863	salicylic acid mediated signaling pathway	116	15	7.97	0.07973		GO:0033597
[truncated: 6,115 more rows]
[truncated: 47 more columns]

## Sheet: Table 6
Table S6 KEGG pathway of differential expressed genes (DEGs) under UV-B treatment
[truncated: 137 more rows]

## Sheet: Table7
Table S7 The differential expressed genes (DEGs) screened from phenylpropanoid metabolite pathway, plant hormone signal transduction pathway, and transcription factor in WGCNA kMEblue module
[truncated: 38 more rows]
